# Supplementary material for: Generation of a transparent killifish line through multiplex CRISPR/Cas9mediated gene inactivation
Source: eLife journal article supplement (doi:10.7554/elife.81549), 2023-02-23
Supplement: fig1-data1 [file Analysis_qPCR_mitfa,ltk,csf1ra.xlsx]

## Sheet: Panel_a-c_male_1-6wph
1wph	1wph_m3	1wph_m8	1wph_m9				F-Test Two-Sample for Variances				F-Test Two-Sample for Variances				F-Test Two-Sample for Variances
mitfa	0.653685	1.38191	1.10701				mitfa_1vs2wph				mitfa_1vs3wph				mitfa_1vs6wph					t-test	1wph_vs_2wph	1wph_vs_3wph	1wph_vs_6wph
ltk	1.31039	1.3566	0.562529					Variable 1	Variable 2			Variable 1	Variable 2			Variable 1	Variable 2			mitfa	0.37352	0.973535	0.0479279
csf1ra	0.870551	1.42405	0.806642				Mean	1.04754	0.806218		Mean	1.04754	1.03779		Mean	1.04754	1.89105				n.s.	n.s.	*
							Variance	0.135232	0.00595437		Variance	0.135232	0.132952		Variance	0.135232	0.209296			ltk	0.0282574	0.026463	0.00210947
							Observations	3	4		Observations	3	4		Observations	3	4				*	*	**
2wph	2wph_m3	2wph_m5	2wph_m9	2wph_m10			df	2	3		df	2	3		df	2	3			csf1ra	0.599511	0.174014	0.166509
mitfa	0.710382	0.874583	0.777366	0.862542			F	22.7114			F	1.01715			F	0.646129					n.s.	n.s.	n.s.
ltk	1.71713	3.27161	2.54912	2.18859			P(F<=f) one-tail	0.0154208			P(F<=f) one-tail	0.460017			P(F<=f) one-tail	0.415677
csf1ra	0.876606	1.00696	0.747425	1.08673			F Critical one-tail	9.55209			F Critical one-tail	9.55209			F Critical one-tail	0.0521804
							UNEQUAL VARIANCE				EQUAL VARIANCE				EQUAL VARIANCE
3wph	3wph_m2	3wph_m3	3wph_m4	3wph_m5
mitfa	1.26284	0.937354	0.569066	1.38191			F-Test Two-Sample for Variances				F-Test Two-Sample for Variances				F-Test Two-Sample for Variances
ltk	13.0864	8.9383	5.20537	5.89708			ltk_1vs2wph				ltk_1vs3wph				ltk_1vs6wph
csf1ra	3.03143	1.55833	1.04972	1.81504				Variable 1	Variable 2			Variable 1	Variable 2			Variable 1	Variable 2
							Mean	1.07651	2.43161		Mean	1.07651	8.28179		Mean	1.07651	12.3933
							Variance	0.198665	0.429649		Variance	0.198665	12.8889		Variance	0.198665	6.11974
6wph	6wph_m1	6wph_m3	6wph_m4	6wph_m5			Observations	3	4		Observations	3	4		Observations	3	4
mitfa	1.53333	1.96791	1.55473	2.50822			df	2	3		df	2	3		df	2	3
ltk	15.3482	9.91766	10.8528	13.4543			F	0.46239			F	0.0154136			F	0.032463
csf1ra	1.34723	3.34035	1.15669	2.26577			P(F<=f) one-tail	0.331719			P(F<=f) one-tail	0.015218			P(F<=f) one-tail	0.0316065
							F Critical one-tail	0.0521804			F Critical one-tail	0.0521804			F Critical one-tail	0.0521804
							EQUAL VARIANCE				UNEQUAL VARIANCE				UNEQUAL VARIANCE
							F-Test Two-Sample for Variances				F-Test Two-Sample for Variances				F-Test Two-Sample for Variances
							csf1ra_1vs2wph				csf1ra_1vs3wph				csf1ra_1vs6wph
								Variable 1	Variable 2			Variable 1	Variable 2			Variable 1	Variable 2
							Mean	1.03375	0.92943		Mean	1.03375	1.86363		Mean	1.03375	2.02751
							Variance	0.115273	0.0222238		Variance	0.115273	0.707263		Variance	0.115273	1.00048
							Observations	3	4		Observations	3	4		Observations	3	4
							df	2	3		df	2	3		df	2	3
							F	5.18693			F	0.162985			F	0.115218
							P(F<=f) one-tail	0.106242			P(F<=f) one-tail	0.143348			P(F<=f) one-tail	0.105068
							F Critical one-tail	9.55209			F Critical one-tail	0.0521804			F Critical one-tail	0.0521804
							EQUAL VARIANCE				EQUAL VARIANCE				EQUAL VARIANCE

## Sheet: Panel_a-c_female_1-6wph
1wph	1wph_w1	1wph_w2	1wph_w4	1wph_w10			F-Test Two-Sample for Variances				F-Test Two-Sample for Variances				F-Test Two-Sample for Variances
mitfa	0.991373	0.725728	1.0924	1.27235			mitfa_1vs2wph				mitfa_1vs3wph				mitfa_1vs6wph					t-test	1wph_vs_2wph	1wph_vs_3wph	1wph_vs_6wph
ltk	1.11535	1.65577	0.534959	1.0122				Variable 1	Variable 2			Variable 1	Variable 2			Variable 1	Variable 2			mitfa	0.106657	0.1967	0.963423
csf1ra	0.96929	0.982821	0.837987	1.25266			Mean	1.02046	0.740148		Mean	1.02046	0.812898		Mean	1.02046	1.01183				n.s.	n.s.	n.s.
							Variance	0.052113	0.00908007		Variance	0.052113	0.00512754		Variance	0.052113	0.0591859			ltk	0.00183133	0.0186686	0.0326284
							Observations	4	3		Observations	4	3		Observations	4	3				**	*	*
2wph	2wph_w6	2wph_w7	2wph_w8				df	3	2		df	3	2		df	3	2			csf1ra	0.288108	0.106981	0.292793
mitfa	0.777816	0.631783	0.810846				F	5.73927			F	10.1633			F	0.880497					n.s.	n.s.	n.s.
ltk	4.98468	4.04882	3.24338				P(F<=f) one-tail	0.15197			P(F<=f) one-tail	0.0909001			P(F<=f) one-tail	0.429326
csf1ra	1.06069	1.27015	1.11342				F Critical one-tail	19.1643			F Critical one-tail	19.1643			F Critical one-tail	0.104689
							EQUAL VARIANCE				EQUAL VARIANCE				EQUAL VARIANCE
3wph	3wph_w6	3wph_w8	3wph_w9
mitfa	0.893475	0.756546	0.788673				F-Test Two-Sample for Variances				F-Test Two-Sample for Variances				F-Test Two-Sample for Variances
ltk	16.0834	10.1085	12.9735				ltk_1vs2wph				ltk_1vs3wph				ltk_1vs6wph
csf1ra	1.95206	1.04608	1.45902					Variable 1	Variable 2			Variable 1	Variable 2			Variable 1	Variable 2
							Mean	1.07957	4.09229		Mean	1.07957	13.0552		Mean	1.07957	14.1023
							Variance	0.211474	0.759443		Variance	0.211474	8.92977		Variance	0.211474	17.994
6wph	6wph_w6	6wph_w7	6wph_w10				Observations	4	3		Observations	4	3		Observations	4	3
mitfa	1.29012	0.905948	0.839441				df	3	2		df	3	2		df	3	2
ltk	13.5245	18.6035	10.1788				F	0.27846			F	0.0236819			F	0.0117525
csf1ra	1.35191	1.27899	0.929805				P(F<=f) one-tail	0.159922			P(F<=f) one-tail	0.00635365			P(F<=f) one-tail	0.00228006
							F Critical one-tail	0.104689			F Critical one-tail	0.104689			F Critical one-tail	0.104689
							EQUAL VARIANCE				UNEQUAL VARIANCE				UNEQUAL VARIANCE
							F-Test Two-Sample for Variances				F-Test Two-Sample for Variances				F-Test Two-Sample for Variances
							csf1ra_1vs2wph				csf1ra_1vs3wph				csf1ra_1vs6wph
								Variable 1	Variable 2			Variable 1	Variable 2			Variable 1	Variable 2
							Mean	1.01069	1.14809		Mean	1.01069	1.48572		Mean	1.01069	1.1869
							Variance	0.0302895	0.01187		Variance	0.0302895	0.205734		Variance	0.0302895	0.0509031
							Observations	4	3		Observations	4	3		Observations	4	3
							df	3	2		df	3	2		df	3	2
							F	2.55178			F	0.147227			F	0.595043
							P(F<=f) one-tail	0.294015			P(F<=f) one-tail	0.0769358			P(F<=f) one-tail	0.323879
							F Critical one-tail	19.1643			F Critical one-tail	0.104689			F Critical one-tail	0.104689
							EQUAL VARIANCE				EQUAL VARIANCE				EQUAL VARIANCE
