# Supplementary material for: Generation of a transparent killifish line through multiplex CRISPR/Cas9mediated gene inactivation
Source: eLife journal article supplement (doi:10.7554/elife.81549), 2023-02-23
Supplement: fig1-figsupp1-data1 [file Analysis_qPCR_mitfa,ltk,csf1ra.xlsx]

## Sheet: Panel_a-c_female_vs_male
1wph	female	1wph_w1	1wph_w2	1wph_w4	1wph_w10		1wph	male	1wph_m3	1wph_m8	1wph_m9				F-Test Two-Sample for Variances				F-Test Two-Sample for Variances				F-Test Two-Sample for Variances				F-Test Two-Sample for Variances
	mitfa	0.991373	0.725728	1.0924	1.27235			mitfa	0.654062	1.38271	1.10765				mitfa_1wph				mitfa_2wph				mitfa_3wph				mitfa_4wph
	ltk	1.11535	1.65577	0.534959	1.0122			ltk	2.02441	2.0958	0.869043					Variable 1	Variable 2			Variable 1	Variable 2			Variable 1	Variable 2			Variable 1	Variable 2
	csf1ra	0.96929	0.982821	0.837987	1.25266			csf1ra	1.41912	2.32141	1.31494				Mean	1.02046	1.04814		Mean	1.00583	1.09625		Mean	1.00253	1.28063		Mean	1.01828	1.9042
															Variance	0.052113	0.135388		Variance	0.0167687	0.011009		Variance	0.00779888	0.202451		Variance	0.0599428	0.212217
															Observations	4	3		Observations	3	4		Observations	3	4		Observations	3	4
2wph	female	2wph_w6	2wph_w7	2wph_w8			2wph	male	2wph_m3	2wph_m5	2wph_m9	2wph_m10			df	3	2		df	2	3		df	2	3		df	2	3
	mitfa	1.05702	0.858565	1.10191				mitfa	0.965936	1.18921	1.05702	1.17283			F	0.384915			F	1.52318			F	0.0385223			F	0.28246
	ltk	1.23685	1.00463	0.80478				ltk	0.658231	1.25411	0.97716	0.838956			P(F<=f) one-tail	0.221454			P(F<=f) one-tail	0.349495			P(F<=f) one-tail	0.0373217			P(F<=f) one-tail	0.228018
	csf1ra	0.926588	1.10957	0.972655				csf1ra	1.24833	1.43396	1.06437	1.54756			F Critical one-tail	0.104689			F Critical one-tail	9.55209			F Critical one-tail	0.0521804			F Critical one-tail	0.0521804
															EQUAL VARIANCE				EQUAL VARIANCE				UNEQUAL VARIANCE				EQUAL VARIANCE
3wph	female	3wph_w6	3wph_w8	3wph_w9			3wph	male	3wph_m2	3wph_m3	3wph_m4	3wph_m5
	mitfa	1.10191	0.933033	0.972655				mitfa	1.55833	1.15669	0.702222	1.70527			F-Test Two-Sample for Variances				F-Test Two-Sample for Variances				F-Test Two-Sample for Variances				F-Test Two-Sample for Variances
	ltk	1.25411	0.788218	1.01162				ltk	1.57644	1.07674	0.627056	0.710382			ltk_1wph				ltk_2wph				ltk_3wph				ltk_4wph
	csf1ra	1.3566	0.726986	1.01396				csf1ra	3.43426	1.76541	1.18921	2.05623				Variable 1	Variable 2			Variable 1	Variable 2			Variable 1	Variable 2			Variable 1	Variable 2
															Mean	1.07957	1.66308		Mean	1.01542	0.932115		Mean	1.01798	0.997653		Mean	1.03075	1.39941
															Variance	0.211474	0.474149		Variance	0.0467576	0.0631341		Variance	0.0542948	0.187037		Variance	0.0961288	0.0780281
6wph	female	6wph_w6	6wph_w7	6wph_w10			6wph	male	6wph_m1	6wph_m3	6wph_m4	6wph_m5			Observations	4	3		Observations	3	4		Observations	3	4		Observations	3	4
	mitfa	1.29834	0.911722	0.844791				mitfa	1.54399	1.9816	1.56555	2.52567			df	3	2		df	2	3		df	2	3		df	2	3
	ltk	0.988514	1.35974	0.743979				ltk	1.73307	1.11987	1.22547	1.51922			F	0.446009			F	0.740609			F	0.290289			F	1.23198
	csf1ra	1.15402	1.09177	0.793701				csf1ra	1.87471	4.64818	1.60956	3.15287			P(F<=f) one-tail	0.253783			P(F<=f) one-tail	0.452243			P(F<=f) one-tail	0.233076			P(F<=f) one-tail	0.406838
															F Critical one-tail	0.104689			F Critical one-tail	0.0521804			F Critical one-tail	0.0521804			F Critical one-tail	9.55209
															EQUAL VARIANCE				EQUAL VARIANCE				EQUAL VARIANCE				EQUAL VARIANCE
															F-Test Two-Sample for Variances				F-Test Two-Sample for Variances				F-Test Two-Sample for Variances				F-Test Two-Sample for Variances
															csf1ra_1wph				csf1ra_2wph				csf1ra_3wph				csf1ra_4wph
																Variable 1	Variable 2			Variable 1	Variable 2			Variable 1	Variable 2			Variable 1	Variable 2
															Mean	1.01069	1.68516		Mean	1.00294	1.32356		Mean	1.03252	2.11128		Mean	1.01316	2.82133
															Variance	0.0302895	0.306324		Variance	0.00905832	0.0450681		Variance	0.099363	0.90772		Variance	0.0370915	1.93726
															Observations	4	3		Observations	3	4		Observations	3	4		Observations	3	4
															df	3	2		df	2	3		df	2	3		df	2	3
															F	0.0988808			F	0.200992			F	0.109464			F	0.0191463
															P(F<=f) one-tail	0.0464205			P(F<=f) one-tail	0.171899			P(F<=f) one-tail	0.100265			P(F<=f) one-tail	0.0188453
															F Critical one-tail	0.104689			F Critical one-tail	0.0521804			F Critical one-tail	0.0521804			F Critical one-tail	0.0521804
															UNEQUAL VARIANCE				EQUAL VARIANCE				EQUAL VARIANCE				UNEQUAL VARIANCE
																female vs male
															t-test	1 wph	2 wph	3 wph	6 wph
															mitfa	0.906156	0.351922	0.307194	0.0307296
																n.s.	n.s.	n.s.	*
															ltk	0.232553	0.665814	0.944838	0.159234
																n.s.	n.s.	n.s.	n.s.
															csf1ra	0.16177	0.0618306	0.123923	0.0788068
																n.s.	n.s.	n.s.	n.s.
