# Supplementary material for: Generation of a transparent killifish line through multiplex CRISPR/Cas9mediated gene inactivation
Source: eLife journal article supplement (doi:10.7554/elife.81549), 2023-02-23
Supplement: fig1-figsupp1-data1 [file Embryohalter_Fischeier_Gezahnt..pdf › Figure_1_figure_supplement_1_source_data/Figure_1_figure_supplement_1_panel_G_source_data/Embryohalter_Fischeier_Gezahnt..pdf]

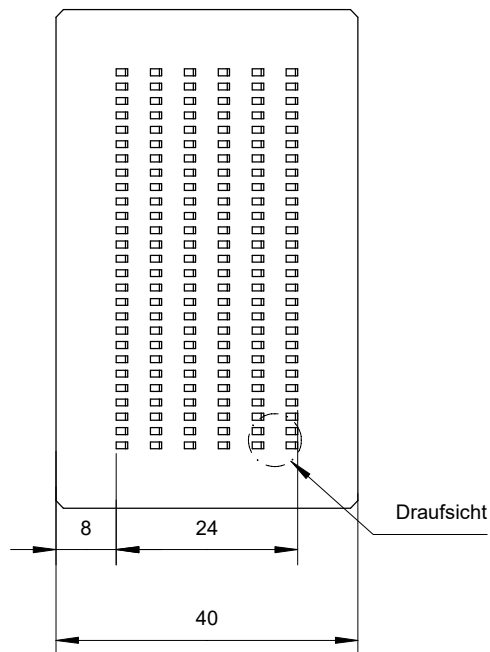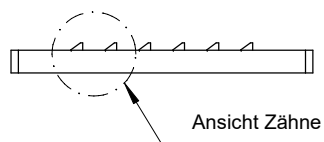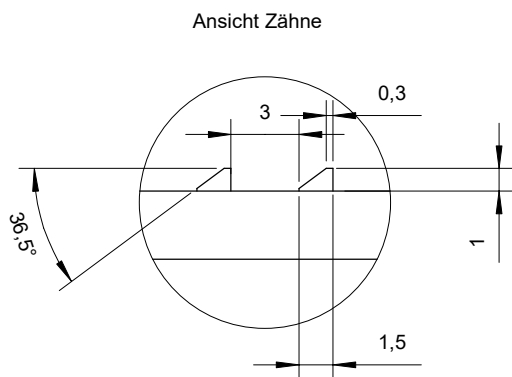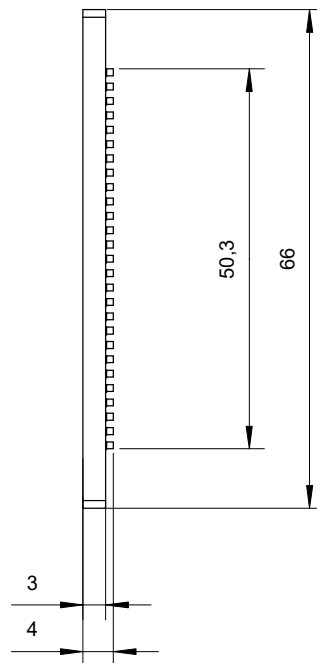

Draufsicht

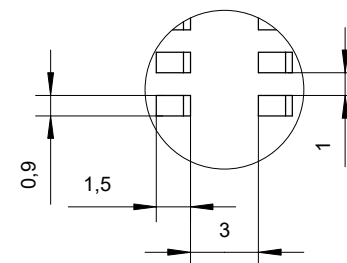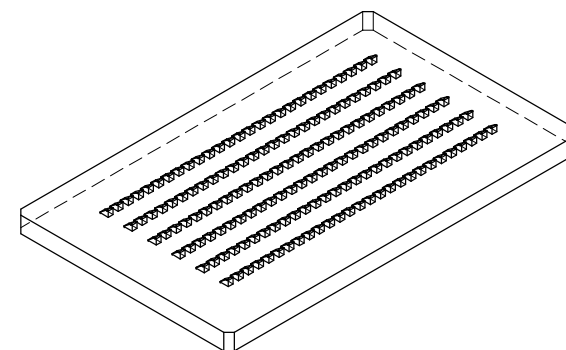

**GT - Labortechnik**  
 Gunther Tietsch  
 Am Artfeld 6  
 97450 Arnstein - Reuchelheim

Tel.: 09363 - 994754  
 Fax: 09363 - 995336  
 Mail: [werkstatt@gt-labortechnik.de](mailto:werkstatt@gt-labortechnik.de)  
 Web: [www.gt-labortechnik.de](http://www.gt-labortechnik.de)

Material: **PSU Natur**

TITEL

**Embryohalter\_Fischeier\_Gezahnt**

GRÖSSE

**A4**

DATUM

**20.04.2017**

NR

GEP

ti

MAßSTAB

BLATT

**1**
