# Supplementary material for: Generation of a transparent killifish line through multiplex CRISPR/Cas9mediated gene inactivation
Source: eLife journal article supplement (doi:10.7554/elife.81549), 2023-02-23
Supplement: fig1-figsupp1-data1 [file Figure_7_egg_counts.xlsx]

## Sheet: Figure_7
Injection
																Panel D
Injection I			Injection II				Injection I+II
injected:	256		injected:	335			injected:	591
GFP+	75		GFP+	136			GFP+	211
GFP-	70		GFP-	109			GFP-	179
dead	111		dead	90			dead	201
																			Panel E
							Alive 7 dpi
								GFP+	GFP-
							alive	137	84
							dead	74	95
