# Supplementary material for: Generation of a transparent killifish line through multiplex CRISPR/Cas9mediated gene inactivation
Source: eLife journal article supplement (doi:10.7554/elife.81549), 2023-02-23
Supplement: fig1-figsupp1-data1 [file qRT-data_calculation_mitfa,ltk,csf1ra_female_vs_male_1wph.xlsx]

## Sheet: (1) primer efficiency
genes meta:	ref. gene 1	ref. gene 2	gene 1	gene 2	gene 3	gene 4	gene 5	gene 6	gene 7	gene 8	gene 9	gene 10	gene 11	gene 12
	rpl13a	ref. gene 2	mitfa	ltk	csf1ra	gene 4	gene 5	gene 6	gene 7	gene 8	gene 9	gene 10	gene 11	gene 12
tec. Rep. = technical replicate		data input				ref. = reference				primer efficiency												Remark: To autofill the names of newly added genes (13+), define a name for the respective data input cell (e.g. cell_name) by selecting it, going to the tab "Formulas" and "Define Name". By entering "=cell_name" into any cell throughout the workbook, you can autofill the gene name from the data input cell. For inspiration on cell names, see "Formulas", "Name Manager".
		Ct values
		rpl13a					y=mx+b			E=10^(-1/m)	E%=(E-1)*100
cDNA input (ng)	log cDNA input	tec. Rep. 1	tec. Rep. 2	tec. Rep. 3	mean		m	b	R2	E	E%
0.234375	-0.630089	17.88			17.88		4.40986	20.3369	0.957822	0.593247	-40.6753
0.9375	-0.0280287	19.57			19.57
3.75	0.574031	23.19			23.19
		ref. gene 2					y=mx+b			E=10^(-1/m)	E%=(E-1)*100
cDNA input (ng)	log cDNA input	tec. Rep. 1	tec. Rep. 2	tec. Rep. 3	mean		m	b	R2	E	E%
0.234375	-0.630089	30.83			30.83		3.91988	33.2199	0.996565	0.555763	-44.4237
0.9375	-0.0280287	32.95			32.95
3.75	0.574031	35.55			35.55
		mitfa					y=mx+b			E=10^(-1/m)	E%=(E-1)*100
cDNA input (ng)	log cDNA input	tec. Rep. 1	tec. Rep. 2	tec. Rep. 3	mean		m	b	R2	E	E%
0.234375	-0.630089	27.04			27.04		3.30532	29.066	0.997573	0.498261	-50.1739
0.9375	-0.0280287	28.86			28.86
3.75	0.574031	31.02			31.02
		ltk					y=mx+b			E=10^(-1/m)	E%=(E-1)*100
cDNA input (ng)	log cDNA input	tec. Rep. 1	tec. Rep. 2	tec. Rep. 3	mean		m	b	R2	E	E%
0.234375	-0.630089	30.01			30.01		3.57938	32.1337	0.988925	0.525559	-47.4441
0.9375	-0.0280287	31.77			31.77
3.75	0.574031	34.32			34.32
		csf1ra					y=mx+b			E=10^(-1/m)	E%=(E-1)*100
cDNA input (ng)	log cDNA input	tec. Rep. 1	tec. Rep. 2	tec. Rep. 3	mean		m	b	R2	E	E%
0.234375	-0.630089				#DIV/0!		#DIV/0!	#DIV/0!	#DIV/0!	#DIV/0!	#DIV/0!
0.9375	-0.0280287				#DIV/0!
3.75	0.574031				#DIV/0!
		gene 4					y=mx+b			E=10^(-1/m)	E%=(E-1)*100
cDNA input (ng)	log cDNA input	tec. Rep. 1	tec. Rep. 2	tec. Rep. 3	mean		m	b	R2	E	E%
0.234375	-0.630089				#DIV/0!		#DIV/0!	#DIV/0!	#DIV/0!	#DIV/0!	#DIV/0!
0.9375	-0.0280287				#DIV/0!
3.75	0.574031				#DIV/0!
#REF!	#REF!				#DIV/0!
		gene 5					y=mx+b			E=10^(-1/m)	E%=(E-1)*100
cDNA input (ng)	log cDNA input	tec. Rep. 1	tec. Rep. 2	tec. Rep. 3	mean		m	b	R2	E	E%
0.234375	-0.630089				#DIV/0!		#DIV/0!	#DIV/0!	#DIV/0!	#DIV/0!	#DIV/0!
0.9375	-0.0280287				#DIV/0!
3.75	0.574031				#DIV/0!
#REF!	#REF!				#DIV/0!
		gene 6					y=mx+b			E=10^(-1/m)	E%=(E-1)*100
cDNA input (ng)	log cDNA input	tec. Rep. 1	tec. Rep. 2	tec. Rep. 3	mean		m	b	R2	E	E%
0.234375	-0.630089				#DIV/0!		#DIV/0!	#DIV/0!	#DIV/0!	#DIV/0!	#DIV/0!
0.9375	-0.0280287				#DIV/0!
3.75	0.574031				#DIV/0!
#REF!	#REF!				#DIV/0!
		gene 7					y=mx+b			E=10^(-1/m)	E%=(E-1)*100
cDNA input (ng)	log cDNA input	tec. Rep. 1	tec. Rep. 2	tec. Rep. 3	mean		m	b	R2	E	E%
0.234375	-0.630089				#DIV/0!		#DIV/0!	#DIV/0!	#DIV/0!	#DIV/0!	#DIV/0!
0.9375	-0.0280287				#DIV/0!
3.75	0.574031				#DIV/0!
#REF!	#REF!				#DIV/0!
		gene 8					y=mx+b			E=10^(-1/m)	E%=(E-1)*100
cDNA input (ng)	log cDNA input	tec. Rep. 1	tec. Rep. 2	tec. Rep. 3	mean		m	b	R2	E	E%
0.234375	-0.630089				#DIV/0!		#DIV/0!	#DIV/0!	#DIV/0!	#DIV/0!	#DIV/0!
0.9375	-0.0280287				#DIV/0!
3.75	0.574031				#DIV/0!
#REF!	#REF!				#DIV/0!
		gene 9					y=mx+b			E=10^(-1/m)	E%=(E-1)*100
cDNA input (ng)	log cDNA input	tec. Rep. 1	tec. Rep. 2	tec. Rep. 3	mean		m	b	R2	E	E%
0.234375	-0.630089				#DIV/0!		#DIV/0!	#DIV/0!	#DIV/0!	#DIV/0!	#DIV/0!
0.9375	-0.0280287				#DIV/0!
3.75	0.574031				#DIV/0!
#REF!	#REF!				#DIV/0!
		gene 10					y=mx+b			E=10^(-1/m)	E%=(E-1)*100
cDNA input (ng)	log cDNA input	tec. Rep. 1	tec. Rep. 2	tec. Rep. 3	mean		m	b	R2	E	E%
0.234375	-0.630089				#DIV/0!		#DIV/0!	#DIV/0!	#DIV/0!	#DIV/0!	#DIV/0!
0.9375	-0.0280287				#DIV/0!
3.75	0.574031				#DIV/0!
#REF!	#REF!				#DIV/0!
		gene 11					y=mx+b			E=10^(-1/m)	E%=(E-1)*100
cDNA input (ng)	log cDNA input	tec. Rep. 1	tec. Rep. 2	tec. Rep. 3	mean		m	b	R2	E	E%
0.234375	-0.630089				#DIV/0!		#DIV/0!	#DIV/0!	#DIV/0!	#DIV/0!	#DIV/0!
0.9375	-0.0280287				#DIV/0!
3.75	0.574031				#DIV/0!
#REF!	#REF!				#DIV/0!
		gene 12					y=mx+b			E=10^(-1/m)	E%=(E-1)*100
cDNA input (ng)	log cDNA input	tec. Rep. 1	tec. Rep. 2	tec. Rep. 3	mean		m	b	R2	E	E%
0.234375	-0.630089				#DIV/0!		#DIV/0!	#DIV/0!	#DIV/0!	#DIV/0!	#DIV/0!
0.9375	-0.0280287				#DIV/0!
3.75	0.574031				#DIV/0!
#REF!	#REF!				#DIV/0!

## Sheet: (2a) fold change n<=12
Cts = means of (1-3) technical replicates per biological replicate, external calculation;								ref.= reference;		cond.= condition;		FC = fold change
data input				data output columns
choose ref. genes (1/2/b for both):				Remark for the addition of further genes by extending the spread sheet to the right: The E formula needs to be altered by changing the row number of the cells from column J and K of tab "(1) primer efficiency" to the respective value in row 10 of the current tab (automatically calculated).
	rpl13a	ref. gene 2	mitfa			ltk			csf1ra			gene 4			gene 5			gene 6			gene 7			gene 8			gene 9			gene 10			gene 11			gene 12
E =	2	2	2	(1) J & K:	24	2	(1) J & K:	31	2	(1) J & K:	38	2	(1) J & K:	45	2	(1) J & K:	52	2	(1) J & K:	59	2	(1) J & K:	66	2	(1) J & K:	73	2	(1) J & K:	80	2	(1) J & K:	87	2	(1) J & K:	94	2	(1) J & K:	101
ref. cond. mean Ct:	16.9725	#DIV/0!	29.77			30.49			29.5175			#DIV/0!			#DIV/0!			#DIV/0!			#DIV/0!			#DIV/0!			#DIV/0!			#DIV/0!			#DIV/0!			#DIV/0!
ref. cond.	Cts	Cts	Cts	FC	log2(FC)	Cts	FC	log2(FC)	Cts	FC	log2(FC)	Cts	FC	log2(FC)	Cts	FC	log2(FC)	Cts	FC	log2(FC)	Cts	FC	log2(FC)	Cts	FC	log2(FC)	Cts	FC	log2(FC)	Cts	FC	log2(FC)	Cts	FC	log2(FC)	Cts	FC	log2(FC)
1wph_w1	16.88		29.69	0.991373	-0.0125	30.24	1.11535	0.1575	29.47	0.96929	-0.045		#N/A	#N/A		#N/A	#N/A		#N/A	#N/A		#N/A	#N/A		#N/A	#N/A		#N/A	#N/A		#N/A	#N/A		#N/A	#N/A		#N/A	#N/A
1wph_w2	16.72		29.98	0.725728	-0.4625	29.51	1.65577	0.7275	29.29	0.982821	-0.025		#N/A	#N/A		#N/A	#N/A		#N/A	#N/A		#N/A	#N/A		#N/A	#N/A		#N/A	#N/A		#N/A	#N/A		#N/A	#N/A		#N/A	#N/A
1wph_w4	17.12		29.79	1.0924	0.1275	31.54	0.534959	-0.9025	29.92	0.837987	-0.255		#N/A	#N/A		#N/A	#N/A		#N/A	#N/A		#N/A	#N/A		#N/A	#N/A		#N/A	#N/A		#N/A	#N/A		#N/A	#N/A		#N/A	#N/A
1wph_w10	17.17		29.62	1.27235	0.3475	30.67	1.0122	0.0175	29.39	1.25266	0.325		#N/A	#N/A		#N/A	#N/A		#N/A	#N/A		#N/A	#N/A		#N/A	#N/A		#N/A	#N/A		#N/A	#N/A		#N/A	#N/A		#N/A	#N/A
				#N/A	#N/A		#N/A	#N/A		#N/A	#N/A		#N/A	#N/A		#N/A	#N/A		#N/A	#N/A		#N/A	#N/A		#N/A	#N/A		#N/A	#N/A		#N/A	#N/A		#N/A	#N/A		#N/A	#N/A
				#N/A	#N/A		#N/A	#N/A		#N/A	#N/A		#N/A	#N/A		#N/A	#N/A		#N/A	#N/A		#N/A	#N/A		#N/A	#N/A		#N/A	#N/A		#N/A	#N/A		#N/A	#N/A		#N/A	#N/A
				#N/A	#N/A		#N/A	#N/A		#N/A	#N/A		#N/A	#N/A		#N/A	#N/A		#N/A	#N/A		#N/A	#N/A		#N/A	#N/A		#N/A	#N/A		#N/A	#N/A		#N/A	#N/A		#N/A	#N/A
				#N/A	#N/A		#N/A	#N/A		#N/A	#N/A		#N/A	#N/A		#N/A	#N/A		#N/A	#N/A		#N/A	#N/A		#N/A	#N/A		#N/A	#N/A		#N/A	#N/A		#N/A	#N/A		#N/A	#N/A
				#N/A	#N/A		#N/A	#N/A		#N/A	#N/A		#N/A	#N/A		#N/A	#N/A		#N/A	#N/A		#N/A	#N/A		#N/A	#N/A		#N/A	#N/A		#N/A	#N/A		#N/A	#N/A		#N/A	#N/A
				#N/A	#N/A		#N/A	#N/A		#N/A	#N/A		#N/A	#N/A		#N/A	#N/A		#N/A	#N/A		#N/A	#N/A		#N/A	#N/A		#N/A	#N/A		#N/A	#N/A		#N/A	#N/A		#N/A	#N/A
				#N/A	#N/A		#N/A	#N/A		#N/A	#N/A		#N/A	#N/A		#N/A	#N/A		#N/A	#N/A		#N/A	#N/A		#N/A	#N/A		#N/A	#N/A		#N/A	#N/A		#N/A	#N/A		#N/A	#N/A
				#N/A	#N/A		#N/A	#N/A		#N/A	#N/A		#N/A	#N/A		#N/A	#N/A		#N/A	#N/A		#N/A	#N/A		#N/A	#N/A		#N/A	#N/A		#N/A	#N/A		#N/A	#N/A		#N/A	#N/A
	rpl13a	ref. gene 2	mitfa			ltk			csf1ra			gene 4			gene 5			gene 6			gene 7			gene 8			gene 9			gene 10			gene 11			gene 12
cond. 1	Cts	Cts	Cts	FC	log2(FC)	Cts	FC	log2(FC)	Cts	FC	log2(FC)	Cts	FC	log2(FC)	Cts	FC	log2(FC)	Cts	FC	log2(FC)	Cts	FC	log2(FC)	Cts	FC	log2(FC)	Cts	FC	log2(FC)	Cts	FC	log2(FC)	Cts	FC	log2(FC)	Cts	FC	log2(FC)
1wph_m3	16.8		30.21	0.654062	-0.6125	29.3	2.02441	1.0175	28.84	1.41912	0.505		#N/A	#N/A		#N/A	#N/A		#N/A	#N/A		#N/A	#N/A		#N/A	#N/A		#N/A	#N/A		#N/A	#N/A		#N/A	#N/A		#N/A	#N/A
1wph_m8	17.25		29.58	1.38271	0.4675	29.7	2.0958	1.0675	28.58	2.32141	1.215		#N/A	#N/A		#N/A	#N/A		#N/A	#N/A		#N/A	#N/A		#N/A	#N/A		#N/A	#N/A		#N/A	#N/A		#N/A	#N/A		#N/A	#N/A
1wph_m9	17.04		29.69	1.10765	0.1475	30.76	0.869043	-0.2025	29.19	1.31494	0.395		#N/A	#N/A		#N/A	#N/A		#N/A	#N/A		#N/A	#N/A		#N/A	#N/A		#N/A	#N/A		#N/A	#N/A		#N/A	#N/A		#N/A	#N/A
				#N/A	#N/A		#N/A	#N/A		#N/A	#N/A		#N/A	#N/A		#N/A	#N/A		#N/A	#N/A		#N/A	#N/A		#N/A	#N/A		#N/A	#N/A		#N/A	#N/A		#N/A	#N/A		#N/A	#N/A
				#N/A	#N/A		#N/A	#N/A		#N/A	#N/A		#N/A	#N/A		#N/A	#N/A		#N/A	#N/A		#N/A	#N/A		#N/A	#N/A		#N/A	#N/A		#N/A	#N/A		#N/A	#N/A		#N/A	#N/A
				#N/A	#N/A		#N/A	#N/A		#N/A	#N/A		#N/A	#N/A		#N/A	#N/A		#N/A	#N/A		#N/A	#N/A		#N/A	#N/A		#N/A	#N/A		#N/A	#N/A		#N/A	#N/A		#N/A	#N/A
				#N/A	#N/A		#N/A	#N/A		#N/A	#N/A		#N/A	#N/A		#N/A	#N/A		#N/A	#N/A		#N/A	#N/A		#N/A	#N/A		#N/A	#N/A		#N/A	#N/A		#N/A	#N/A		#N/A	#N/A
				#N/A	#N/A		#N/A	#N/A		#N/A	#N/A		#N/A	#N/A		#N/A	#N/A		#N/A	#N/A		#N/A	#N/A		#N/A	#N/A		#N/A	#N/A		#N/A	#N/A		#N/A	#N/A		#N/A	#N/A
				#N/A	#N/A		#N/A	#N/A		#N/A	#N/A		#N/A	#N/A		#N/A	#N/A		#N/A	#N/A		#N/A	#N/A		#N/A	#N/A		#N/A	#N/A		#N/A	#N/A		#N/A	#N/A		#N/A	#N/A
				#N/A	#N/A		#N/A	#N/A		#N/A	#N/A		#N/A	#N/A		#N/A	#N/A		#N/A	#N/A		#N/A	#N/A		#N/A	#N/A		#N/A	#N/A		#N/A	#N/A		#N/A	#N/A		#N/A	#N/A
				#N/A	#N/A		#N/A	#N/A		#N/A	#N/A		#N/A	#N/A		#N/A	#N/A		#N/A	#N/A		#N/A	#N/A		#N/A	#N/A		#N/A	#N/A		#N/A	#N/A		#N/A	#N/A		#N/A	#N/A
				#N/A	#N/A		#N/A	#N/A		#N/A	#N/A		#N/A	#N/A		#N/A	#N/A		#N/A	#N/A		#N/A	#N/A		#N/A	#N/A		#N/A	#N/A		#N/A	#N/A		#N/A	#N/A		#N/A	#N/A
	rpl13a	ref. gene 2	mitfa			ltk			csf1ra			gene 4			gene 5			gene 6			gene 7			gene 8			gene 9			gene 10			gene 11			gene 12
cond. 2	Cts	Cts	Cts	FC	log2(FC)	Cts	FC	log2(FC)	Cts	FC	log2(FC)	Cts	FC	log2(FC)	Cts	FC	log2(FC)	Cts	FC	log2(FC)	Cts	FC	log2(FC)	Cts	FC	log2(FC)	Cts	FC	log2(FC)	Cts	FC	log2(FC)	Cts	FC	log2(FC)	Cts	FC	log2(FC)
				#N/A	#N/A		#N/A	#N/A	29.94	5.80207e-06	-17.395		#N/A	#N/A		#N/A	#N/A		#N/A	#N/A		#N/A	#N/A		#N/A	#N/A		#N/A	#N/A		#N/A	#N/A		#N/A	#N/A		#N/A	#N/A
				#N/A	#N/A		#N/A	#N/A	30.53	3.85457e-06	-17.985		#N/A	#N/A		#N/A	#N/A		#N/A	#N/A		#N/A	#N/A		#N/A	#N/A		#N/A	#N/A		#N/A	#N/A		#N/A	#N/A		#N/A	#N/A
				#N/A	#N/A		#N/A	#N/A	29.9	5.96519e-06	-17.355		#N/A	#N/A		#N/A	#N/A		#N/A	#N/A		#N/A	#N/A		#N/A	#N/A		#N/A	#N/A		#N/A	#N/A		#N/A	#N/A		#N/A	#N/A
				#N/A	#N/A		#N/A	#N/A		#N/A	#N/A		#N/A	#N/A		#N/A	#N/A		#N/A	#N/A		#N/A	#N/A		#N/A	#N/A		#N/A	#N/A		#N/A	#N/A		#N/A	#N/A		#N/A	#N/A
				#N/A	#N/A		#N/A	#N/A		#N/A	#N/A		#N/A	#N/A		#N/A	#N/A		#N/A	#N/A		#N/A	#N/A		#N/A	#N/A		#N/A	#N/A		#N/A	#N/A		#N/A	#N/A		#N/A	#N/A
				#N/A	#N/A		#N/A	#N/A		#N/A	#N/A		#N/A	#N/A		#N/A	#N/A		#N/A	#N/A		#N/A	#N/A		#N/A	#N/A		#N/A	#N/A		#N/A	#N/A		#N/A	#N/A		#N/A	#N/A
				#N/A	#N/A		#N/A	#N/A		#N/A	#N/A		#N/A	#N/A		#N/A	#N/A		#N/A	#N/A		#N/A	#N/A		#N/A	#N/A		#N/A	#N/A		#N/A	#N/A		#N/A	#N/A		#N/A	#N/A
				#N/A	#N/A		#N/A	#N/A		#N/A	#N/A		#N/A	#N/A		#N/A	#N/A		#N/A	#N/A		#N/A	#N/A		#N/A	#N/A		#N/A	#N/A		#N/A	#N/A		#N/A	#N/A		#N/A	#N/A
				#N/A	#N/A		#N/A	#N/A		#N/A	#N/A		#N/A	#N/A		#N/A	#N/A		#N/A	#N/A		#N/A	#N/A		#N/A	#N/A		#N/A	#N/A		#N/A	#N/A		#N/A	#N/A		#N/A	#N/A
				#N/A	#N/A		#N/A	#N/A		#N/A	#N/A		#N/A	#N/A		#N/A	#N/A		#N/A	#N/A		#N/A	#N/A		#N/A	#N/A		#N/A	#N/A		#N/A	#N/A		#N/A	#N/A		#N/A	#N/A
				#N/A	#N/A		#N/A	#N/A		#N/A	#N/A		#N/A	#N/A		#N/A	#N/A		#N/A	#N/A		#N/A	#N/A		#N/A	#N/A		#N/A	#N/A		#N/A	#N/A		#N/A	#N/A		#N/A	#N/A
				#N/A	#N/A		#N/A	#N/A		#N/A	#N/A		#N/A	#N/A		#N/A	#N/A		#N/A	#N/A		#N/A	#N/A		#N/A	#N/A		#N/A	#N/A		#N/A	#N/A		#N/A	#N/A		#N/A	#N/A
	rpl13a	ref. gene 2	mitfa			ltk			csf1ra			gene 4			gene 5			gene 6			gene 7			gene 8			gene 9			gene 10			gene 11			gene 12
cond. 3	Cts	Cts	Cts	FC	log2(FC)	Cts	FC	log2(FC)	Cts	FC	log2(FC)	Cts	FC	log2(FC)	Cts	FC	log2(FC)	Cts	FC	log2(FC)	Cts	FC	log2(FC)	Cts	FC	log2(FC)	Cts	FC	log2(FC)	Cts	FC	log2(FC)	Cts	FC	log2(FC)	Cts	FC	log2(FC)
				#N/A	#N/A		#N/A	#N/A		#N/A	#N/A		#N/A	#N/A		#N/A	#N/A		#N/A	#N/A		#N/A	#N/A		#N/A	#N/A		#N/A	#N/A		#N/A	#N/A		#N/A	#N/A		#N/A	#N/A
				#N/A	#N/A		#N/A	#N/A		#N/A	#N/A		#N/A	#N/A		#N/A	#N/A		#N/A	#N/A		#N/A	#N/A		#N/A	#N/A		#N/A	#N/A		#N/A	#N/A		#N/A	#N/A		#N/A	#N/A
				#N/A	#N/A		#N/A	#N/A		#N/A	#N/A		#N/A	#N/A		#N/A	#N/A		#N/A	#N/A		#N/A	#N/A		#N/A	#N/A		#N/A	#N/A		#N/A	#N/A		#N/A	#N/A		#N/A	#N/A
				#N/A	#N/A		#N/A	#N/A		#N/A	#N/A		#N/A	#N/A		#N/A	#N/A		#N/A	#N/A		#N/A	#N/A		#N/A	#N/A		#N/A	#N/A		#N/A	#N/A		#N/A	#N/A		#N/A	#N/A
				#N/A	#N/A		#N/A	#N/A		#N/A	#N/A		#N/A	#N/A		#N/A	#N/A		#N/A	#N/A		#N/A	#N/A		#N/A	#N/A		#N/A	#N/A		#N/A	#N/A		#N/A	#N/A		#N/A	#N/A
				#N/A	#N/A		#N/A	#N/A		#N/A	#N/A		#N/A	#N/A		#N/A	#N/A		#N/A	#N/A		#N/A	#N/A		#N/A	#N/A		#N/A	#N/A		#N/A	#N/A		#N/A	#N/A		#N/A	#N/A
				#N/A	#N/A		#N/A	#N/A		#N/A	#N/A		#N/A	#N/A		#N/A	#N/A		#N/A	#N/A		#N/A	#N/A		#N/A	#N/A		#N/A	#N/A		#N/A	#N/A		#N/A	#N/A		#N/A	#N/A
				#N/A	#N/A		#N/A	#N/A		#N/A	#N/A		#N/A	#N/A		#N/A	#N/A		#N/A	#N/A		#N/A	#N/A		#N/A	#N/A		#N/A	#N/A		#N/A	#N/A		#N/A	#N/A		#N/A	#N/A
				#N/A	#N/A		#N/A	#N/A		#N/A	#N/A		#N/A	#N/A		#N/A	#N/A		#N/A	#N/A		#N/A	#N/A		#N/A	#N/A		#N/A	#N/A		#N/A	#N/A		#N/A	#N/A		#N/A	#N/A
				#N/A	#N/A		#N/A	#N/A		#N/A	#N/A		#N/A	#N/A		#N/A	#N/A		#N/A	#N/A		#N/A	#N/A		#N/A	#N/A		#N/A	#N/A		#N/A	#N/A		#N/A	#N/A		#N/A	#N/A
				#N/A	#N/A		#N/A	#N/A		#N/A	#N/A		#N/A	#N/A		#N/A	#N/A		#N/A	#N/A		#N/A	#N/A		#N/A	#N/A		#N/A	#N/A		#N/A	#N/A		#N/A	#N/A		#N/A	#N/A
				#N/A	#N/A		#N/A	#N/A		#N/A	#N/A		#N/A	#N/A		#N/A	#N/A		#N/A	#N/A		#N/A	#N/A		#N/A	#N/A		#N/A	#N/A		#N/A	#N/A		#N/A	#N/A		#N/A	#N/A
	rpl13a	ref. gene 2	mitfa			ltk			csf1ra			gene 4			gene 5			gene 6			gene 7			gene 8			gene 9			gene 10			gene 11			gene 12
cond. 4	Cts	Cts	Cts	FC	log2(FC)	Cts	FC	log2(FC)	Cts	FC	log2(FC)	Cts	FC	log2(FC)	Cts	FC	log2(FC)	Cts	FC	log2(FC)	Cts	FC	log2(FC)	Cts	FC	log2(FC)	Cts	FC	log2(FC)	Cts	FC	log2(FC)	Cts	FC	log2(FC)	Cts	FC	log2(FC)
				#N/A	#N/A		#N/A	#N/A		#N/A	#N/A		#N/A	#N/A		#N/A	#N/A		#N/A	#N/A		#N/A	#N/A		#N/A	#N/A		#N/A	#N/A		#N/A	#N/A		#N/A	#N/A		#N/A	#N/A
				#N/A	#N/A		#N/A	#N/A		#N/A	#N/A		#N/A	#N/A		#N/A	#N/A		#N/A	#N/A		#N/A	#N/A		#N/A	#N/A		#N/A	#N/A		#N/A	#N/A		#N/A	#N/A		#N/A	#N/A
				#N/A	#N/A		#N/A	#N/A		#N/A	#N/A		#N/A	#N/A		#N/A	#N/A		#N/A	#N/A		#N/A	#N/A		#N/A	#N/A		#N/A	#N/A		#N/A	#N/A		#N/A	#N/A		#N/A	#N/A
				#N/A	#N/A		#N/A	#N/A		#N/A	#N/A		#N/A	#N/A		#N/A	#N/A		#N/A	#N/A		#N/A	#N/A		#N/A	#N/A		#N/A	#N/A		#N/A	#N/A		#N/A	#N/A		#N/A	#N/A
				#N/A	#N/A		#N/A	#N/A		#N/A	#N/A		#N/A	#N/A		#N/A	#N/A		#N/A	#N/A		#N/A	#N/A		#N/A	#N/A		#N/A	#N/A		#N/A	#N/A		#N/A	#N/A		#N/A	#N/A
				#N/A	#N/A		#N/A	#N/A		#N/A	#N/A		#N/A	#N/A		#N/A	#N/A		#N/A	#N/A		#N/A	#N/A		#N/A	#N/A		#N/A	#N/A		#N/A	#N/A		#N/A	#N/A		#N/A	#N/A
				#N/A	#N/A		#N/A	#N/A		#N/A	#N/A		#N/A	#N/A		#N/A	#N/A		#N/A	#N/A		#N/A	#N/A		#N/A	#N/A		#N/A	#N/A		#N/A	#N/A		#N/A	#N/A		#N/A	#N/A
				#N/A	#N/A		#N/A	#N/A		#N/A	#N/A		#N/A	#N/A		#N/A	#N/A		#N/A	#N/A		#N/A	#N/A		#N/A	#N/A		#N/A	#N/A		#N/A	#N/A		#N/A	#N/A		#N/A	#N/A
				#N/A	#N/A		#N/A	#N/A		#N/A	#N/A		#N/A	#N/A		#N/A	#N/A		#N/A	#N/A		#N/A	#N/A		#N/A	#N/A		#N/A	#N/A		#N/A	#N/A		#N/A	#N/A		#N/A	#N/A
				#N/A	#N/A		#N/A	#N/A		#N/A	#N/A		#N/A	#N/A		#N/A	#N/A		#N/A	#N/A		#N/A	#N/A		#N/A	#N/A		#N/A	#N/A		#N/A	#N/A		#N/A	#N/A		#N/A	#N/A
				#N/A	#N/A		#N/A	#N/A		#N/A	#N/A		#N/A	#N/A		#N/A	#N/A		#N/A	#N/A		#N/A	#N/A		#N/A	#N/A		#N/A	#N/A		#N/A	#N/A		#N/A	#N/A		#N/A	#N/A
				#N/A	#N/A		#N/A	#N/A		#N/A	#N/A		#N/A	#N/A		#N/A	#N/A		#N/A	#N/A		#N/A	#N/A		#N/A	#N/A		#N/A	#N/A		#N/A	#N/A		#N/A	#N/A		#N/A	#N/A
	rpl13a	ref. gene 2	mitfa			ltk			csf1ra			gene 4			gene 5			gene 6			gene 7			gene 8			gene 9			gene 10			gene 11			gene 12
cond. 5	Cts	Cts	Cts	FC	log2(FC)	Cts	FC	log2(FC)	Cts	FC	log2(FC)	Cts	FC	log2(FC)	Cts	FC	log2(FC)	Cts	FC	log2(FC)	Cts	FC	log2(FC)	Cts	FC	log2(FC)	Cts	FC	log2(FC)	Cts	FC	log2(FC)	Cts	FC	log2(FC)	Cts	FC	log2(FC)
				#N/A	#N/A		#N/A	#N/A		#N/A	#N/A		#N/A	#N/A		#N/A	#N/A		#N/A	#N/A		#N/A	#N/A		#N/A	#N/A		#N/A	#N/A		#N/A	#N/A		#N/A	#N/A		#N/A	#N/A
				#N/A	#N/A		#N/A	#N/A		#N/A	#N/A		#N/A	#N/A		#N/A	#N/A		#N/A	#N/A		#N/A	#N/A		#N/A	#N/A		#N/A	#N/A		#N/A	#N/A		#N/A	#N/A		#N/A	#N/A
				#N/A	#N/A		#N/A	#N/A		#N/A	#N/A		#N/A	#N/A		#N/A	#N/A		#N/A	#N/A		#N/A	#N/A		#N/A	#N/A		#N/A	#N/A		#N/A	#N/A		#N/A	#N/A		#N/A	#N/A
				#N/A	#N/A		#N/A	#N/A		#N/A	#N/A		#N/A	#N/A		#N/A	#N/A		#N/A	#N/A		#N/A	#N/A		#N/A	#N/A		#N/A	#N/A		#N/A	#N/A		#N/A	#N/A		#N/A	#N/A
				#N/A	#N/A		#N/A	#N/A		#N/A	#N/A		#N/A	#N/A		#N/A	#N/A		#N/A	#N/A		#N/A	#N/A		#N/A	#N/A		#N/A	#N/A		#N/A	#N/A		#N/A	#N/A		#N/A	#N/A
				#N/A	#N/A		#N/A	#N/A		#N/A	#N/A		#N/A	#N/A		#N/A	#N/A		#N/A	#N/A		#N/A	#N/A		#N/A	#N/A		#N/A	#N/A		#N/A	#N/A		#N/A	#N/A		#N/A	#N/A
				#N/A	#N/A		#N/A	#N/A		#N/A	#N/A		#N/A	#N/A		#N/A	#N/A		#N/A	#N/A		#N/A	#N/A		#N/A	#N/A		#N/A	#N/A		#N/A	#N/A		#N/A	#N/A		#N/A	#N/A
				#N/A	#N/A		#N/A	#N/A		#N/A	#N/A		#N/A	#N/A		#N/A	#N/A		#N/A	#N/A		#N/A	#N/A		#N/A	#N/A		#N/A	#N/A		#N/A	#N/A		#N/A	#N/A		#N/A	#N/A
				#N/A	#N/A		#N/A	#N/A		#N/A	#N/A		#N/A	#N/A		#N/A	#N/A		#N/A	#N/A		#N/A	#N/A		#N/A	#N/A		#N/A	#N/A		#N/A	#N/A		#N/A	#N/A		#N/A	#N/A
				#N/A	#N/A		#N/A	#N/A		#N/A	#N/A		#N/A	#N/A		#N/A	#N/A		#N/A	#N/A		#N/A	#N/A		#N/A	#N/A		#N/A	#N/A		#N/A	#N/A		#N/A	#N/A		#N/A	#N/A
				#N/A	#N/A		#N/A	#N/A		#N/A	#N/A		#N/A	#N/A		#N/A	#N/A		#N/A	#N/A		#N/A	#N/A		#N/A	#N/A		#N/A	#N/A		#N/A	#N/A		#N/A	#N/A		#N/A	#N/A
				#N/A	#N/A		#N/A	#N/A		#N/A	#N/A		#N/A	#N/A		#N/A	#N/A		#N/A	#N/A		#N/A	#N/A		#N/A	#N/A		#N/A	#N/A		#N/A	#N/A		#N/A	#N/A		#N/A	#N/A

## Sheet: (3a_1) FC box plot 1 n<=12
gene	condition
	ref. cond.	cond. 1	cond. 2	cond. 3	cond. 4	cond. 5
mitfa	0.991373	0.654062	#N/A	#N/A	#N/A	#N/A
mitfa	0.725728	1.38271	#N/A	#N/A	#N/A	#N/A
mitfa	1.0924	1.10765	#N/A	#N/A	#N/A	#N/A
mitfa	1.27235	#N/A	#N/A	#N/A	#N/A	#N/A
mitfa	#N/A	#N/A	#N/A	#N/A	#N/A	#N/A
mitfa	#N/A	#N/A	#N/A	#N/A	#N/A	#N/A
mitfa	#N/A	#N/A	#N/A	#N/A	#N/A	#N/A
mitfa	#N/A	#N/A	#N/A	#N/A	#N/A	#N/A
mitfa	#N/A	#N/A	#N/A	#N/A	#N/A	#N/A
mitfa	#N/A	#N/A	#N/A	#N/A	#N/A	#N/A
mitfa	#N/A	#N/A	#N/A	#N/A	#N/A	#N/A
mitfa	#N/A	#N/A	#N/A	#N/A	#N/A	#N/A
ltk	1.11535	2.02441	#N/A	#N/A	#N/A	#N/A
ltk	1.65577	2.0958	#N/A	#N/A	#N/A	#N/A
ltk	0.534959	0.869043	#N/A	#N/A	#N/A	#N/A
ltk	1.0122	#N/A	#N/A	#N/A	#N/A	#N/A
ltk	#N/A	#N/A	#N/A	#N/A	#N/A	#N/A
ltk	#N/A	#N/A	#N/A	#N/A	#N/A	#N/A
ltk	#N/A	#N/A	#N/A	#N/A	#N/A	#N/A
ltk	#N/A	#N/A	#N/A	#N/A	#N/A	#N/A
ltk	#N/A	#N/A	#N/A	#N/A	#N/A	#N/A
ltk	#N/A	#N/A	#N/A	#N/A	#N/A	#N/A
ltk	#N/A	#N/A	#N/A	#N/A	#N/A	#N/A
ltk	#N/A	#N/A	#N/A	#N/A	#N/A	#N/A
csf1ra	0.96929	1.41912	5.80207e-06	#N/A	#N/A	#N/A
csf1ra	0.982821	2.32141	3.85457e-06	#N/A	#N/A	#N/A
csf1ra	0.837987	1.31494	5.96519e-06	#N/A	#N/A	#N/A
csf1ra	1.25266	#N/A	#N/A	#N/A	#N/A	#N/A
csf1ra	#N/A	#N/A	#N/A	#N/A	#N/A	#N/A
csf1ra	#N/A	#N/A	#N/A	#N/A	#N/A	#N/A
csf1ra	#N/A	#N/A	#N/A	#N/A	#N/A	#N/A
csf1ra	#N/A	#N/A	#N/A	#N/A	#N/A	#N/A
csf1ra	#N/A	#N/A	#N/A	#N/A	#N/A	#N/A
csf1ra	#N/A	#N/A	#N/A	#N/A	#N/A	#N/A
csf1ra	#N/A	#N/A	#N/A	#N/A	#N/A	#N/A
csf1ra	#N/A	#N/A	#N/A	#N/A	#N/A	#N/A
gene 4	#N/A	#N/A	#N/A	#N/A	#N/A	#N/A
gene 4	#N/A	#N/A	#N/A	#N/A	#N/A	#N/A
gene 4	#N/A	#N/A	#N/A	#N/A	#N/A	#N/A
gene 4	#N/A	#N/A	#N/A	#N/A	#N/A	#N/A
gene 4	#N/A	#N/A	#N/A	#N/A	#N/A	#N/A
gene 4	#N/A	#N/A	#N/A	#N/A	#N/A	#N/A
gene 4	#N/A	#N/A	#N/A	#N/A	#N/A	#N/A
gene 4	#N/A	#N/A	#N/A	#N/A	#N/A	#N/A
gene 4	#N/A	#N/A	#N/A	#N/A	#N/A	#N/A
gene 4	#N/A	#N/A	#N/A	#N/A	#N/A	#N/A
gene 4	#N/A	#N/A	#N/A	#N/A	#N/A	#N/A
gene 4	#N/A	#N/A	#N/A	#N/A	#N/A	#N/A
gene 5	#N/A	#N/A	#N/A	#N/A	#N/A	#N/A
gene 5	#N/A	#N/A	#N/A	#N/A	#N/A	#N/A
gene 5	#N/A	#N/A	#N/A	#N/A	#N/A	#N/A
gene 5	#N/A	#N/A	#N/A	#N/A	#N/A	#N/A
gene 5	#N/A	#N/A	#N/A	#N/A	#N/A	#N/A
gene 5	#N/A	#N/A	#N/A	#N/A	#N/A	#N/A
gene 5	#N/A	#N/A	#N/A	#N/A	#N/A	#N/A
gene 5	#N/A	#N/A	#N/A	#N/A	#N/A	#N/A
gene 5	#N/A	#N/A	#N/A	#N/A	#N/A	#N/A
gene 5	#N/A	#N/A	#N/A	#N/A	#N/A	#N/A
gene 5	#N/A	#N/A	#N/A	#N/A	#N/A	#N/A
gene 5	#N/A	#N/A	#N/A	#N/A	#N/A	#N/A
gene 6	#N/A	#N/A	#N/A	#N/A	#N/A	#N/A
gene 6	#N/A	#N/A	#N/A	#N/A	#N/A	#N/A
gene 6	#N/A	#N/A	#N/A	#N/A	#N/A	#N/A
gene 6	#N/A	#N/A	#N/A	#N/A	#N/A	#N/A
gene 6	#N/A	#N/A	#N/A	#N/A	#N/A	#N/A
gene 6	#N/A	#N/A	#N/A	#N/A	#N/A	#N/A
gene 6	#N/A	#N/A	#N/A	#N/A	#N/A	#N/A
gene 6	#N/A	#N/A	#N/A	#N/A	#N/A	#N/A
gene 6	#N/A	#N/A	#N/A	#N/A	#N/A	#N/A
gene 6	#N/A	#N/A	#N/A	#N/A	#N/A	#N/A
gene 6	#N/A	#N/A	#N/A	#N/A	#N/A	#N/A
gene 6	#N/A	#N/A	#N/A	#N/A	#N/A	#N/A
gene 7	#N/A	#N/A	#N/A	#N/A	#N/A	#N/A
gene 7	#N/A	#N/A	#N/A	#N/A	#N/A	#N/A
gene 7	#N/A	#N/A	#N/A	#N/A	#N/A	#N/A
gene 7	#N/A	#N/A	#N/A	#N/A	#N/A	#N/A
gene 7	#N/A	#N/A	#N/A	#N/A	#N/A	#N/A
gene 7	#N/A	#N/A	#N/A	#N/A	#N/A	#N/A
gene 7	#N/A	#N/A	#N/A	#N/A	#N/A	#N/A
gene 7	#N/A	#N/A	#N/A	#N/A	#N/A	#N/A
gene 7	#N/A	#N/A	#N/A	#N/A	#N/A	#N/A
gene 7	#N/A	#N/A	#N/A	#N/A	#N/A	#N/A
gene 7	#N/A	#N/A	#N/A	#N/A	#N/A	#N/A
gene 7	#N/A	#N/A	#N/A	#N/A	#N/A	#N/A
gene 8	#N/A	#N/A	#N/A	#N/A	#N/A	#N/A
gene 8	#N/A	#N/A	#N/A	#N/A	#N/A	#N/A
gene 8	#N/A	#N/A	#N/A	#N/A	#N/A	#N/A
gene 8	#N/A	#N/A	#N/A	#N/A	#N/A	#N/A
gene 8	#N/A	#N/A	#N/A	#N/A	#N/A	#N/A
gene 8	#N/A	#N/A	#N/A	#N/A	#N/A	#N/A
gene 8	#N/A	#N/A	#N/A	#N/A	#N/A	#N/A
gene 8	#N/A	#N/A	#N/A	#N/A	#N/A	#N/A
gene 8	#N/A	#N/A	#N/A	#N/A	#N/A	#N/A
gene 8	#N/A	#N/A	#N/A	#N/A	#N/A	#N/A
gene 8	#N/A	#N/A	#N/A	#N/A	#N/A	#N/A
gene 8	#N/A	#N/A	#N/A	#N/A	#N/A	#N/A
gene 9	#N/A	#N/A	#N/A	#N/A	#N/A	#N/A
gene 9	#N/A	#N/A	#N/A	#N/A	#N/A	#N/A
gene 9	#N/A	#N/A	#N/A	#N/A	#N/A	#N/A
gene 9	#N/A	#N/A	#N/A	#N/A	#N/A	#N/A
gene 9	#N/A	#N/A	#N/A	#N/A	#N/A	#N/A
gene 9	#N/A	#N/A	#N/A	#N/A	#N/A	#N/A
gene 9	#N/A	#N/A	#N/A	#N/A	#N/A	#N/A
gene 9	#N/A	#N/A	#N/A	#N/A	#N/A	#N/A
gene 9	#N/A	#N/A	#N/A	#N/A	#N/A	#N/A
gene 9	#N/A	#N/A	#N/A	#N/A	#N/A	#N/A
gene 9	#N/A	#N/A	#N/A	#N/A	#N/A	#N/A
gene 9	#N/A	#N/A	#N/A	#N/A	#N/A	#N/A
gene 10	#N/A	#N/A	#N/A	#N/A	#N/A	#N/A
gene 10	#N/A	#N/A	#N/A	#N/A	#N/A	#N/A
gene 10	#N/A	#N/A	#N/A	#N/A	#N/A	#N/A
gene 10	#N/A	#N/A	#N/A	#N/A	#N/A	#N/A
gene 10	#N/A	#N/A	#N/A	#N/A	#N/A	#N/A
gene 10	#N/A	#N/A	#N/A	#N/A	#N/A	#N/A
gene 10	#N/A	#N/A	#N/A	#N/A	#N/A	#N/A
gene 10	#N/A	#N/A	#N/A	#N/A	#N/A	#N/A
gene 10	#N/A	#N/A	#N/A	#N/A	#N/A	#N/A
gene 10	#N/A	#N/A	#N/A	#N/A	#N/A	#N/A
gene 10	#N/A	#N/A	#N/A	#N/A	#N/A	#N/A
gene 10	#N/A	#N/A	#N/A	#N/A	#N/A	#N/A
gene 11	#N/A	#N/A	#N/A	#N/A	#N/A	#N/A
gene 11	#N/A	#N/A	#N/A	#N/A	#N/A	#N/A
gene 11	#N/A	#N/A	#N/A	#N/A	#N/A	#N/A
gene 11	#N/A	#N/A	#N/A	#N/A	#N/A	#N/A
gene 11	#N/A	#N/A	#N/A	#N/A	#N/A	#N/A
gene 11	#N/A	#N/A	#N/A	#N/A	#N/A	#N/A
gene 11	#N/A	#N/A	#N/A	#N/A	#N/A	#N/A
gene 11	#N/A	#N/A	#N/A	#N/A	#N/A	#N/A
gene 11	#N/A	#N/A	#N/A	#N/A	#N/A	#N/A
gene 11	#N/A	#N/A	#N/A	#N/A	#N/A	#N/A
gene 11	#N/A	#N/A	#N/A	#N/A	#N/A	#N/A
gene 11	#N/A	#N/A	#N/A	#N/A	#N/A	#N/A
gene 12	#N/A	#N/A	#N/A	#N/A	#N/A	#N/A
gene 12	#N/A	#N/A	#N/A	#N/A	#N/A	#N/A
gene 12	#N/A	#N/A	#N/A	#N/A	#N/A	#N/A
gene 12	#N/A	#N/A	#N/A	#N/A	#N/A	#N/A
gene 12	#N/A	#N/A	#N/A	#N/A	#N/A	#N/A
gene 12	#N/A	#N/A	#N/A	#N/A	#N/A	#N/A
gene 12	#N/A	#N/A	#N/A	#N/A	#N/A	#N/A
gene 12	#N/A	#N/A	#N/A	#N/A	#N/A	#N/A
gene 12	#N/A	#N/A	#N/A	#N/A	#N/A	#N/A
gene 12	#N/A	#N/A	#N/A	#N/A	#N/A	#N/A
gene 12	#N/A	#N/A	#N/A	#N/A	#N/A	#N/A
gene 12	#N/A	#N/A	#N/A	#N/A	#N/A	#N/A

## Sheet: (2b) fold change open n
Cts = means of (1-3) technical replicates per biological replicate, external calculation;								ref.= reference;		cond.= condition;		FC = fold change
data input		use function AVERAGE on respective ref. cond. Cts							data output colums
choose ref. genes (1/2/b for both):				Remark for the addition of further genes by extending the spread sheet to the right: The E formula needs to be altered by changing the row number of the cells from column J and K of tab "(1) primer efficiency" to the respective value in row 10 of the current tab (automatically calculated).
	rpl13a	ref. gene 2	mitfa			ltk			csf1ra			gene 4			gene 5			gene 6			gene 7			gene 8			gene 9			gene 10			gene 11			gene 12
E =	2	2	2	(1) J & K:	24	2	(1) J & K:	31	2	(1) J & K:	38	2	(1) J & K:	45	2	(1) J & K:	52	2	(1) J & K:	59	2	(1) J & K:	66	2	(1) J & K:	73	2	(1) J & K:	80	2	(1) J & K:	87	2	(1) J & K:	94	2	(1) J & K:	101
ref. cond. mean Ct:
sample	Cts	Cts	Cts	FC	log2(FC)	Cts	FC	log2(FC)	Cts	FC	log2(FC)	Cts	FC	log2(FC)	Cts	FC	log2(FC)	Cts	FC	log2(FC)	Cts	FC	log2(FC)	Cts	FC	log2(FC)	Cts	FC	log2(FC)	Cts	FC	log2(FC)	Cts	FC	log2(FC)	Cts	FC	log2(FC)
				#N/A	#N/A		#N/A	#N/A		#N/A	#N/A		#N/A	#N/A		#N/A	#N/A		#N/A	#N/A		#N/A	#N/A		#N/A	#N/A		#N/A	#N/A		#N/A	#N/A		#N/A	#N/A		#N/A	#N/A
				#N/A	#N/A		#N/A	#N/A		#N/A	#N/A		#N/A	#N/A		#N/A	#N/A		#N/A	#N/A		#N/A	#N/A		#N/A	#N/A		#N/A	#N/A		#N/A	#N/A		#N/A	#N/A		#N/A	#N/A
				#N/A	#N/A		#N/A	#N/A		#N/A	#N/A		#N/A	#N/A		#N/A	#N/A		#N/A	#N/A		#N/A	#N/A		#N/A	#N/A		#N/A	#N/A		#N/A	#N/A		#N/A	#N/A		#N/A	#N/A
				#N/A	#N/A		#N/A	#N/A		#N/A	#N/A		#N/A	#N/A		#N/A	#N/A		#N/A	#N/A		#N/A	#N/A		#N/A	#N/A		#N/A	#N/A		#N/A	#N/A		#N/A	#N/A		#N/A	#N/A
				#N/A	#N/A		#N/A	#N/A		#N/A	#N/A		#N/A	#N/A		#N/A	#N/A		#N/A	#N/A		#N/A	#N/A		#N/A	#N/A		#N/A	#N/A		#N/A	#N/A		#N/A	#N/A		#N/A	#N/A
				#N/A	#N/A		#N/A	#N/A		#N/A	#N/A		#N/A	#N/A		#N/A	#N/A		#N/A	#N/A		#N/A	#N/A		#N/A	#N/A		#N/A	#N/A		#N/A	#N/A		#N/A	#N/A		#N/A	#N/A
				#N/A	#N/A		#N/A	#N/A		#N/A	#N/A		#N/A	#N/A		#N/A	#N/A		#N/A	#N/A		#N/A	#N/A		#N/A	#N/A		#N/A	#N/A		#N/A	#N/A		#N/A	#N/A		#N/A	#N/A
				#N/A	#N/A		#N/A	#N/A		#N/A	#N/A		#N/A	#N/A		#N/A	#N/A		#N/A	#N/A		#N/A	#N/A		#N/A	#N/A		#N/A	#N/A		#N/A	#N/A		#N/A	#N/A		#N/A	#N/A
				#N/A	#N/A		#N/A	#N/A		#N/A	#N/A		#N/A	#N/A		#N/A	#N/A		#N/A	#N/A		#N/A	#N/A		#N/A	#N/A		#N/A	#N/A		#N/A	#N/A		#N/A	#N/A		#N/A	#N/A
				#N/A	#N/A		#N/A	#N/A		#N/A	#N/A		#N/A	#N/A		#N/A	#N/A		#N/A	#N/A		#N/A	#N/A		#N/A	#N/A		#N/A	#N/A		#N/A	#N/A		#N/A	#N/A		#N/A	#N/A
				#N/A	#N/A		#N/A	#N/A		#N/A	#N/A		#N/A	#N/A		#N/A	#N/A		#N/A	#N/A		#N/A	#N/A		#N/A	#N/A		#N/A	#N/A		#N/A	#N/A		#N/A	#N/A		#N/A	#N/A
				#N/A	#N/A		#N/A	#N/A		#N/A	#N/A		#N/A	#N/A		#N/A	#N/A		#N/A	#N/A		#N/A	#N/A		#N/A	#N/A		#N/A	#N/A		#N/A	#N/A		#N/A	#N/A		#N/A	#N/A
				#N/A	#N/A		#N/A	#N/A		#N/A	#N/A		#N/A	#N/A		#N/A	#N/A		#N/A	#N/A		#N/A	#N/A		#N/A	#N/A		#N/A	#N/A		#N/A	#N/A		#N/A	#N/A		#N/A	#N/A
				#N/A	#N/A		#N/A	#N/A		#N/A	#N/A		#N/A	#N/A		#N/A	#N/A		#N/A	#N/A		#N/A	#N/A		#N/A	#N/A		#N/A	#N/A		#N/A	#N/A		#N/A	#N/A		#N/A	#N/A
				#N/A	#N/A		#N/A	#N/A		#N/A	#N/A		#N/A	#N/A		#N/A	#N/A		#N/A	#N/A		#N/A	#N/A		#N/A	#N/A		#N/A	#N/A		#N/A	#N/A		#N/A	#N/A		#N/A	#N/A
				#N/A	#N/A		#N/A	#N/A		#N/A	#N/A		#N/A	#N/A		#N/A	#N/A		#N/A	#N/A		#N/A	#N/A		#N/A	#N/A		#N/A	#N/A		#N/A	#N/A		#N/A	#N/A		#N/A	#N/A
				#N/A	#N/A		#N/A	#N/A		#N/A	#N/A		#N/A	#N/A		#N/A	#N/A		#N/A	#N/A		#N/A	#N/A		#N/A	#N/A		#N/A	#N/A		#N/A	#N/A		#N/A	#N/A		#N/A	#N/A
				#N/A	#N/A		#N/A	#N/A		#N/A	#N/A		#N/A	#N/A		#N/A	#N/A		#N/A	#N/A		#N/A	#N/A		#N/A	#N/A		#N/A	#N/A		#N/A	#N/A		#N/A	#N/A		#N/A	#N/A
				#N/A	#N/A		#N/A	#N/A		#N/A	#N/A		#N/A	#N/A		#N/A	#N/A		#N/A	#N/A		#N/A	#N/A		#N/A	#N/A		#N/A	#N/A		#N/A	#N/A		#N/A	#N/A		#N/A	#N/A
				#N/A	#N/A		#N/A	#N/A		#N/A	#N/A		#N/A	#N/A		#N/A	#N/A		#N/A	#N/A		#N/A	#N/A		#N/A	#N/A		#N/A	#N/A		#N/A	#N/A		#N/A	#N/A		#N/A	#N/A
				#N/A	#N/A		#N/A	#N/A		#N/A	#N/A		#N/A	#N/A		#N/A	#N/A		#N/A	#N/A		#N/A	#N/A		#N/A	#N/A		#N/A	#N/A		#N/A	#N/A		#N/A	#N/A		#N/A	#N/A
				#N/A	#N/A		#N/A	#N/A		#N/A	#N/A		#N/A	#N/A		#N/A	#N/A		#N/A	#N/A		#N/A	#N/A		#N/A	#N/A		#N/A	#N/A		#N/A	#N/A		#N/A	#N/A		#N/A	#N/A
				#N/A	#N/A		#N/A	#N/A		#N/A	#N/A		#N/A	#N/A		#N/A	#N/A		#N/A	#N/A		#N/A	#N/A		#N/A	#N/A		#N/A	#N/A		#N/A	#N/A		#N/A	#N/A		#N/A	#N/A
				#N/A	#N/A		#N/A	#N/A		#N/A	#N/A		#N/A	#N/A		#N/A	#N/A		#N/A	#N/A		#N/A	#N/A		#N/A	#N/A		#N/A	#N/A		#N/A	#N/A		#N/A	#N/A		#N/A	#N/A
				#N/A	#N/A		#N/A	#N/A		#N/A	#N/A		#N/A	#N/A		#N/A	#N/A		#N/A	#N/A		#N/A	#N/A		#N/A	#N/A		#N/A	#N/A		#N/A	#N/A		#N/A	#N/A		#N/A	#N/A
				#N/A	#N/A		#N/A	#N/A		#N/A	#N/A		#N/A	#N/A		#N/A	#N/A		#N/A	#N/A		#N/A	#N/A		#N/A	#N/A		#N/A	#N/A		#N/A	#N/A		#N/A	#N/A		#N/A	#N/A
				#N/A	#N/A		#N/A	#N/A		#N/A	#N/A		#N/A	#N/A		#N/A	#N/A		#N/A	#N/A		#N/A	#N/A		#N/A	#N/A		#N/A	#N/A		#N/A	#N/A		#N/A	#N/A		#N/A	#N/A
				#N/A	#N/A		#N/A	#N/A		#N/A	#N/A		#N/A	#N/A		#N/A	#N/A		#N/A	#N/A		#N/A	#N/A		#N/A	#N/A		#N/A	#N/A		#N/A	#N/A		#N/A	#N/A		#N/A	#N/A

## Sheet: (3b) box plot open n
mean Ct = mean of 3 technical replicates
E	1.97			E	2.01			E	2.05
	rpl13a				dmrt1				cyp19a1a					mean folds
sample	mean Ct	delta Ct		sample	mean Ct	delta Ct	folds	sample	mean Ct	delta Ct	folds			dmrt1	cyp19a1a
ovary 1	17.6448	-0.0462145		ovary 1	26.63	0.486667	1.44932	ovary 1	24.12	-0.38	0.785493		ovary	1.04418	1.0196
ovary 2	16.7081	0.890504		ovary 2	26.75	0.366667	0.706234	ovary 2	22.9	0.84	0.999194		testis	58.3627	0.28763
ovary 3	18.4429	-0.84429		ovary 3	27.97	-0.853333	0.976984	ovary 3	24.2	-0.46	1.27411
testis 1	18.1075	-0.508856		testis 1	21.74	5.37667	60.2595	testis 1	28.17	-4.43	0.058718			SEM
testis 2	18.1201	-0.521473		testis 2	21.52	5.59667	70.8669	testis 2	24.76	-1.02	0.684805			dmrt1	cyp19a1a
testis 3	16.2318	1.36684		testis 3	20.37	6.74667	43.9616	testis 3	25.41	-1.67	0.119366		ovary	0.177282	0.11547
													testis	6.38873	0.162775
average
ovaries	17.5986				27.1167				23.74
	dmrt1
	cyp19a1a
		ovary	testis			dmrt1	cyp19a1a
	dmrt1	1.44932	60.2595		ovary	1.44932	0.785493
	dmrt1	0.706234	70.8669		ovary	0.706234	0.999194
	dmrt1	0.976984	43.9616		ovary	0.976984	1.27411
	cyp19a1a	0.785493	0.058718		testis	60.2595	0.058718
	cyp19a1a	0.999194	0.684805		testis	70.8669	0.684805
	cyp19a1a	1.27411	0.119366		testis	43.9616	0.119366
		ovary	testis			dmrt1	cyp19a1a
	dmrt1	0.535375	5.91312		ovary	0.535375	-0.34833
	dmrt1	-0.501783	6.14704		ovary	-0.501783	-0.00116348
	dmrt1	-0.0335928	5.45817		ovary	-0.0335928	0.349494
	cyp19a1a	-0.34833	-4.09005		testis	5.91312	-4.09005
	cyp19a1a	-0.00116348	-0.546234		testis	6.14704	-0.546234
	cyp19a1a	0.349494	-3.06653		testis	5.45817	-3.06653
