# Supplementary material for: Generation of a transparent killifish line through multiplex CRISPR/Cas9mediated gene inactivation
Source: eLife journal article supplement (doi:10.7554/elife.81549), 2023-02-23
Supplement: fig1-figsupp2-data1 [file Figure_1_figure_supplement_1_panel_abc_source_data.pdf › Figure_1_figure_supplement_2_source_data/Figure_1_figure_supplement_2_panel_ABC_source_data/Figure_1_figure_supplement_1_panel_abc_source_data.pdf]

## Supplement Figure 1

panel i

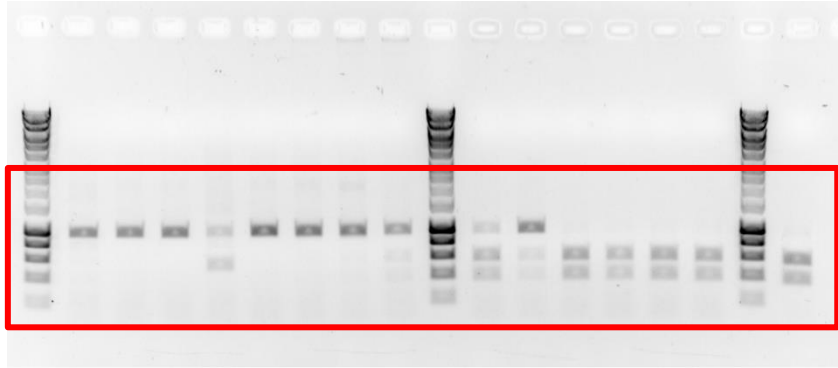

*mitfa*

panel j

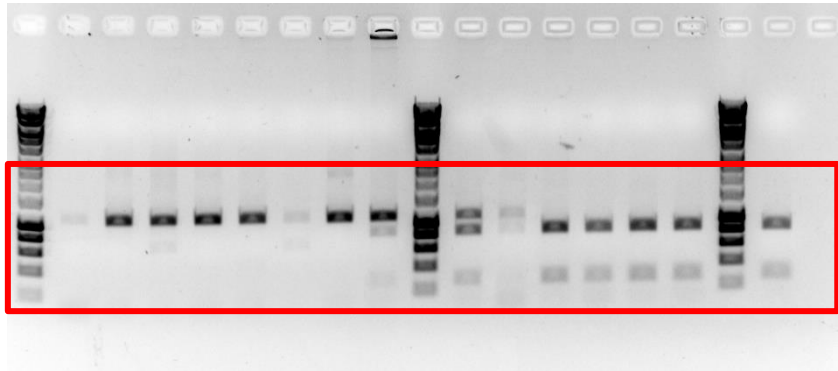

*Itk*

panel k

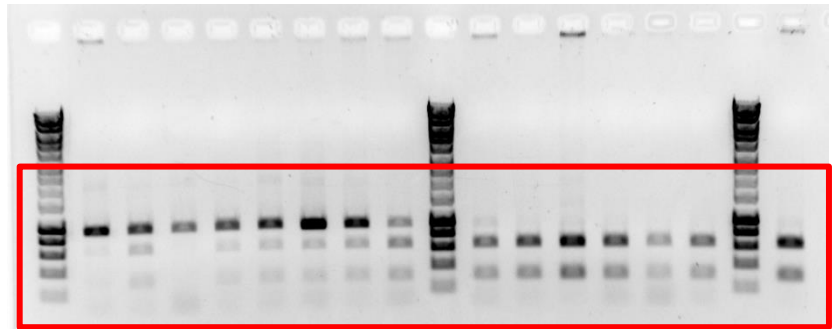

*csf1ra*

The red box surrounds the lanes shown in the respective panel.
