# Supplementary material for: Generation of a transparent killifish line through multiplex CRISPR/Cas9mediated gene inactivation
Source: eLife journal article supplement (doi:10.7554/elife.81549), 2023-02-23
Supplement: fig1-figsupp2-data1 [file Panel_d_data.xlsx]

## Sheet: Figure_10
Fish #	Date of hatching	Sex	Generation	Mutation - Control digest
				mitfa	ltk	csf1ra
1	2017-08-07	female	F0	üü	üü	üx		üü	completely mutated (one undigested band)
2		male	F0	üü	üü	üx		üx	mosaicism (undigested band + two additional smaller fragments)
3		male	F0	üx	üx	üx		n.a.	Assay did not work (also not after repetition) --> Fish completely removed from analysis
4		male	F0	üü	üü	üü
5		male	F0	üü	üü	üx		Assignment was done based on restrcition enzyme digests
6		male	F0	üü	üü	üx
7		male	F0	üx	üx	üx
8		male	F0	üü	üü	üx
9		female	F0	üü	üx	n.a.
10		male	F0	üx	üü	üx
11		female	F0	üx	üx	üx			Amount of fish (total: 85)	mitfa	ltk	csf1ra
12		male	F0	üx	üx	üx			mosaic mutations	44	28	65
13		female	F0	üx	üü	üx			mutated	41	57	20
14		female	F0	üx	üx	üx			Sum	85	85	85
15		female	F0	üü	üü	üü
16		male	F0	üü	üü	üü
17		female	F0	üx	üü	üx
18		male	F0	üx	üx	üx			[%]	mitfa	ltk	csf1ra
19		female	F0	üx	üü	üx			mosaic mutations	51.7647	32.9412	76.4706
20		male	F0	üx	üx	üx			mutated	48.2353	67.0588	23.5294
21		female	F0	üü	üx	üx			Sum	100	100	100
22		male	F0	üx	üx	üx
23		female	F0	üx	üü	üx
24		male	F0	üü	üx	üx
25		female	F0	üü	üü	üx
26		male	F0	üx	üü	üx
27		male	F0	üü	üü	üx
28		male	F0	üx	üü	üx
29		female	F0	üx	üx	üx
30		female	F0	üx	üü	üx
31		female	F0	üx	üü	üx
32		female	F0	üx	n.a.	n.a.
33		female	F0	üx	üx	üx
34		male	F0	üx	üx	üx
35		male	F0	üx	üx	üx
36		male	F0	üü	üü	üx
37		male	F0	üü	üx	üx
38		male	F0	üx	üx	üx
39		female	F0	üü	üü	üx
40		male	F0	üü	üü	üx
41		female	F0	üx	üx	üx
42	2017-08-21	female	F0	üx	üx	üx
43		male	F0	üü	üü	üx
44		female	F0	üx	üx	n.a.
45		female	F0	üü	üü	üx
46		male	F0	üx	üü	üx
47		female	F0	üü	üü	üx
48		male	F0	üx	üx	üx
49		female	F0	üü	üü	üx
50		male	F0	üx	üü	üü
51		female	F0	üx	üü	üx
52		female	F0	üü	üü	üü
53		female	F0	üx	üü	üü
54		female	F0	üx	üx	üx
55		female	F0	üü	üü	üx
56		female	F0	üx	üx	üx
57		male	F0	üx	üü	üü
58		female	F0	üx	üx	üx
59		female	F0	üü	üü	üü
60		female	F0	üx	üü	üx
61		male	F0	üx	üü	üü
62		male	F0	üx	üx	üx
63		male	F0	üü	üü	üx
64		male	F0	üü	üü	üx
65		male	F0	üü	üx	üx
66		female	F0	üü	n.a.	üx
67		male	F0	üü	üü	üx
68		female	F0	üü	üü	üx
69		male	F0	üx	üx	üx
70		female	F0	üü	üü	üü
71		male	F0	üx	üü	üx
72		female	F0	üü	üü	üü
73		male	F0	üx	üü	üü
74		female	F0	üü	üü	üü
75		male	F0	üx	üü	üx
76		female	F0	üx	üü	üx
77		male	F0	üü	üü	üx
78		female	F0	üx	üü	üü
79		female	F0	üü	üü	üü
80		female	F0	üx	üx	üx
81		male	F0	üü	üx	üx
82		female	F0	üü	üü	üx
83		male	F0	üü	üü	üx
84		male	F0	üü	üü	üü
85		female	F0	üü	üü	üü
86		male	F0	üü	üx	üü
87		female	F0	üü	üü	üü
88		male	F0	üx	üü	üx
89		female	F0	üü	üü	üü
