# Supplementary material for: Generation of a transparent killifish line through multiplex CRISPR/Cas9mediated gene inactivation
Source: eLife journal article supplement (doi:10.7554/elife.81549), 2023-02-23

|                      |       |
|----------------------|-------|
| Clipped length:      | 918   |
| Left clip:           | 80    |
| Right clip:          | 997   |
| Avg. qual. in clip.: | 51.92 |

Samples: 12798  
Bases: 1068  
Average spacing: 12.0  
Average quality >= 10: 39, 20: 47, 30: 953

Quality: 0 - 9   
 10 - 19   
 20 - 29   
 >= 30 

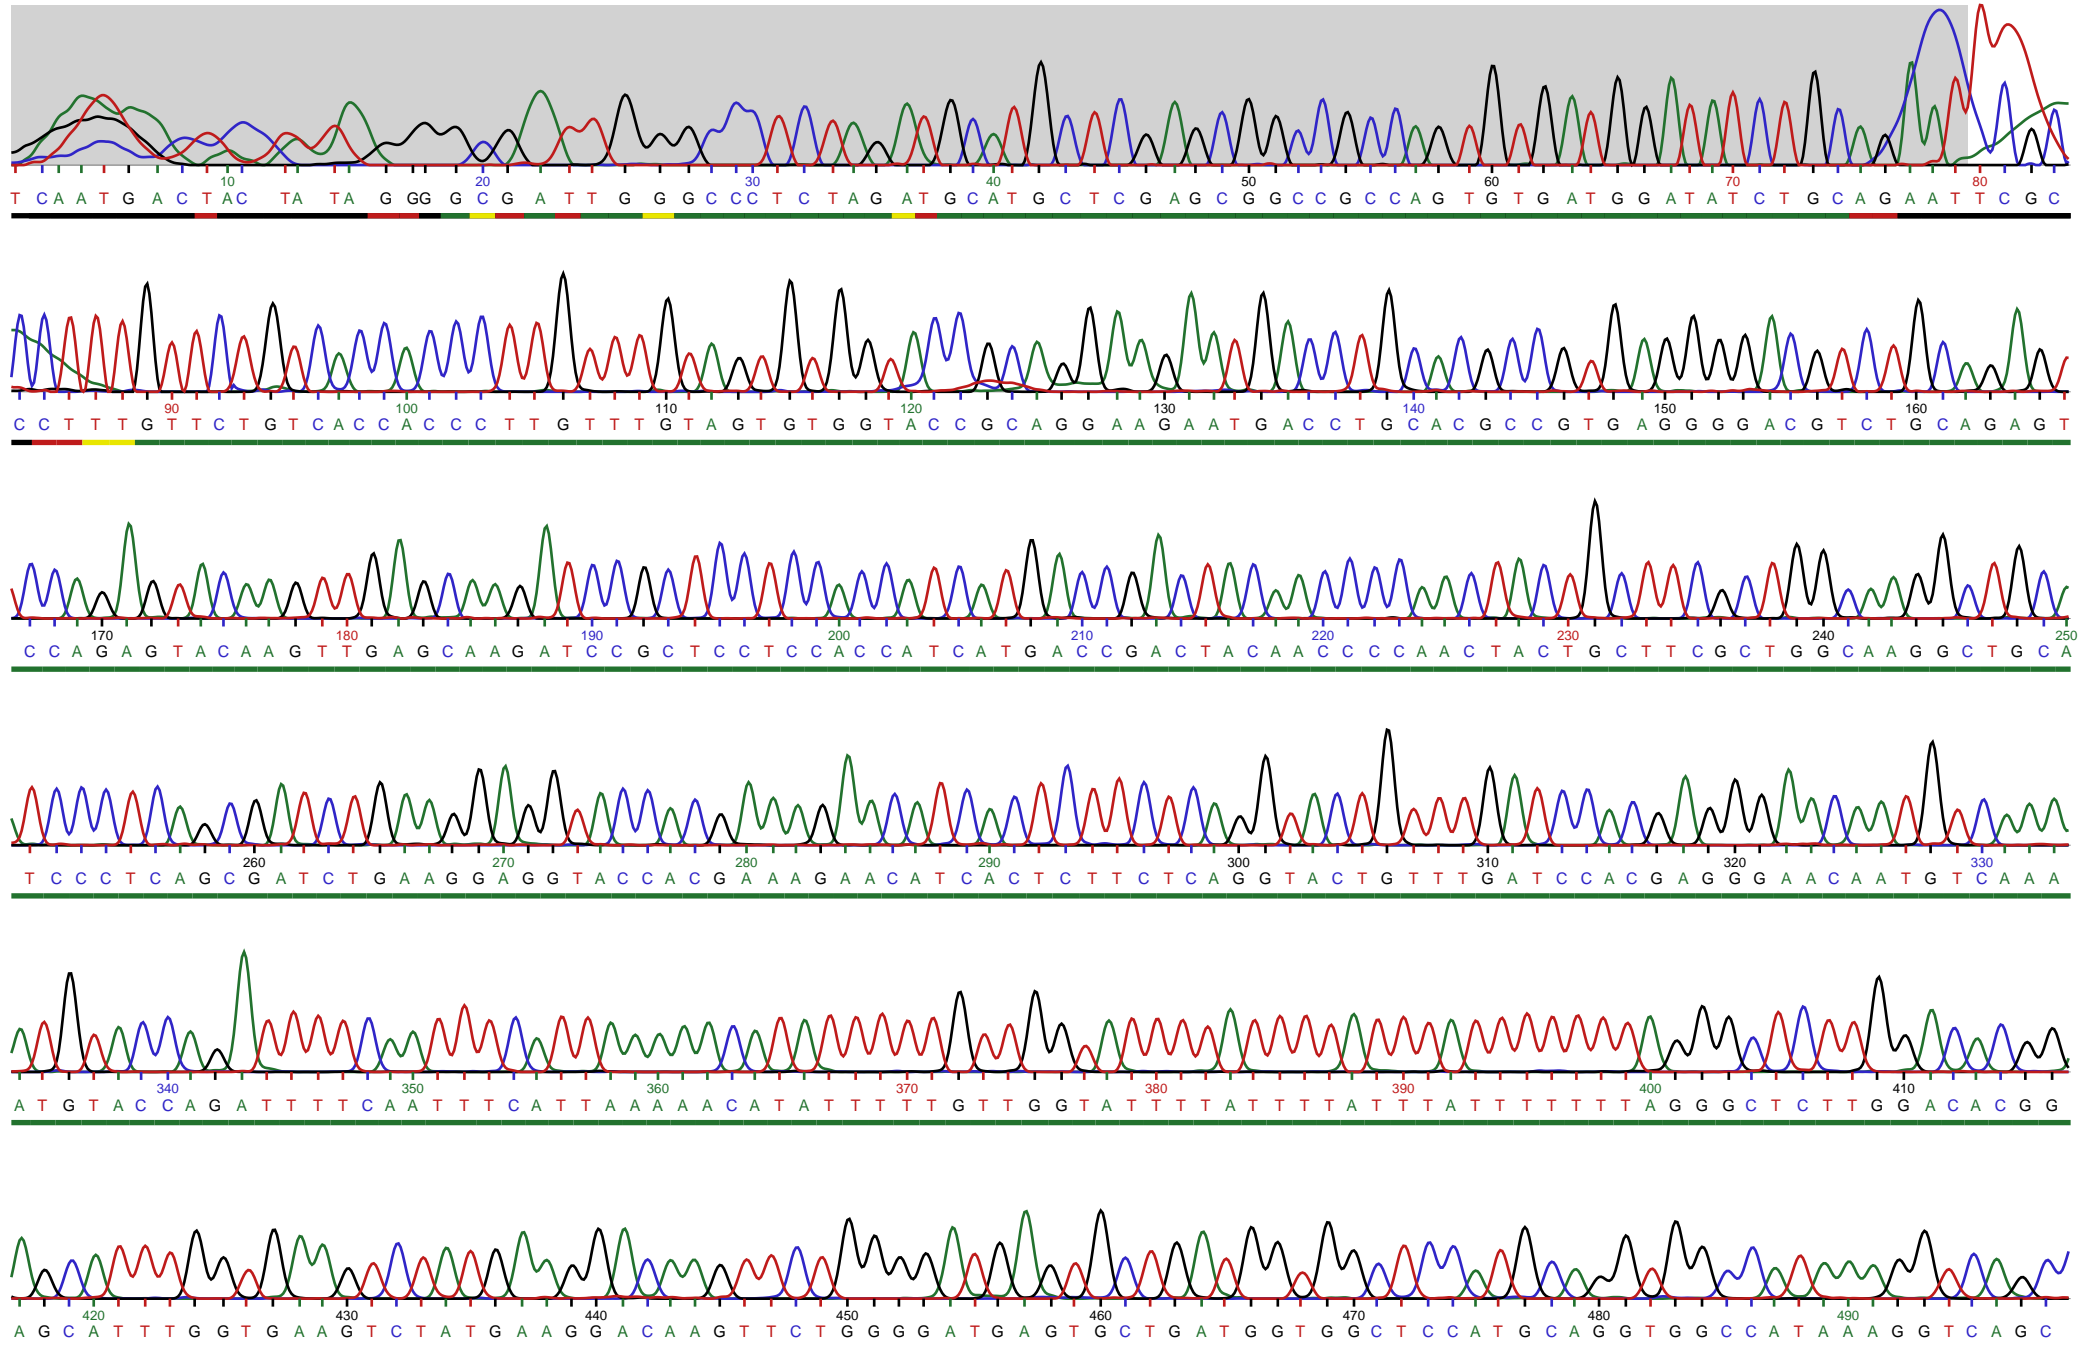

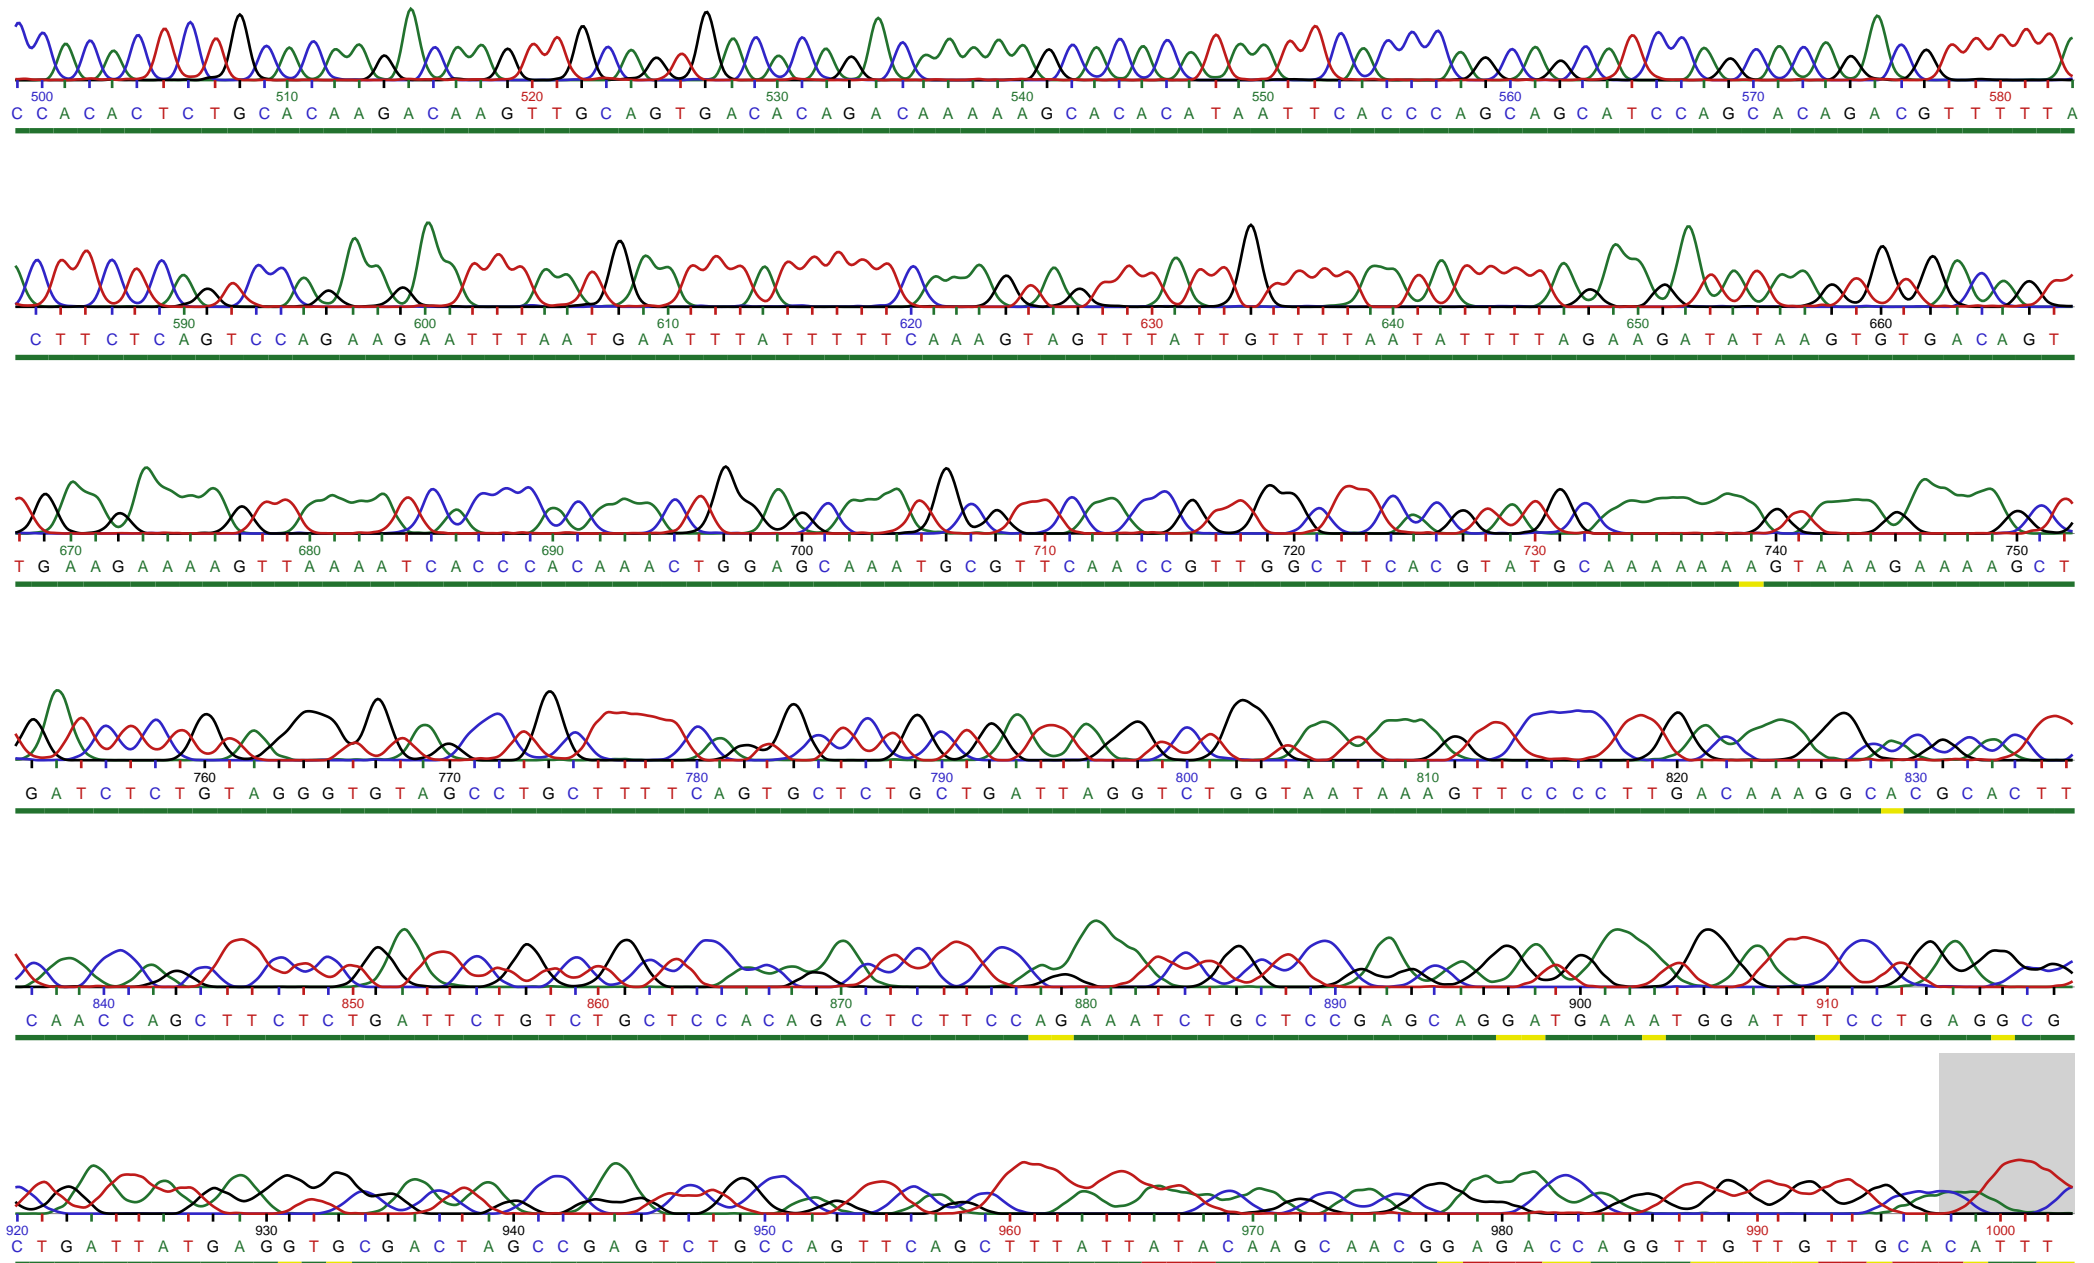

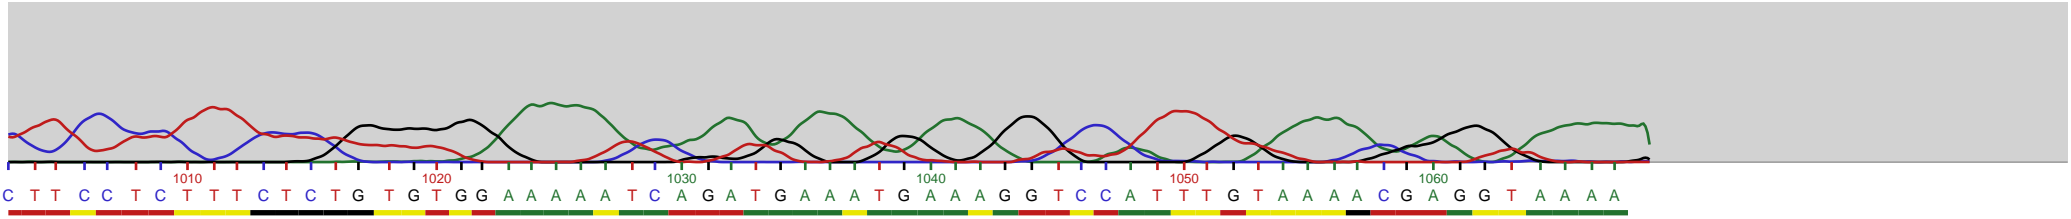

Supplement: fig1-figsupp3-data1 [file 1a_M13uni-21.pdf › Figure_1_figure_supplement_3_source_data/Figure_1_figure_supplement_3_panel_ABC_source_data/Originals_F1_sequencing/Fish_1/ltk/ltk #1a_M13uni-21.pdf]
