# Supplementary material for: Generation of a transparent killifish line through multiplex CRISPR/Cas9mediated gene inactivation
Source: eLife journal article supplement (doi:10.7554/elife.81549), 2023-02-23

Clipped length: 933  
Left clip: 8  
Right clip: 940  
Avg. qual. in clip.: 52.81

Samples: 13106  
Bases: 1084  
Average spacing: 13.0  
Average quality >= 10: 50, 20: 60, 30: 918

Quality: 0 - 9  
10 - 19  
20 - 29  
≥ 30

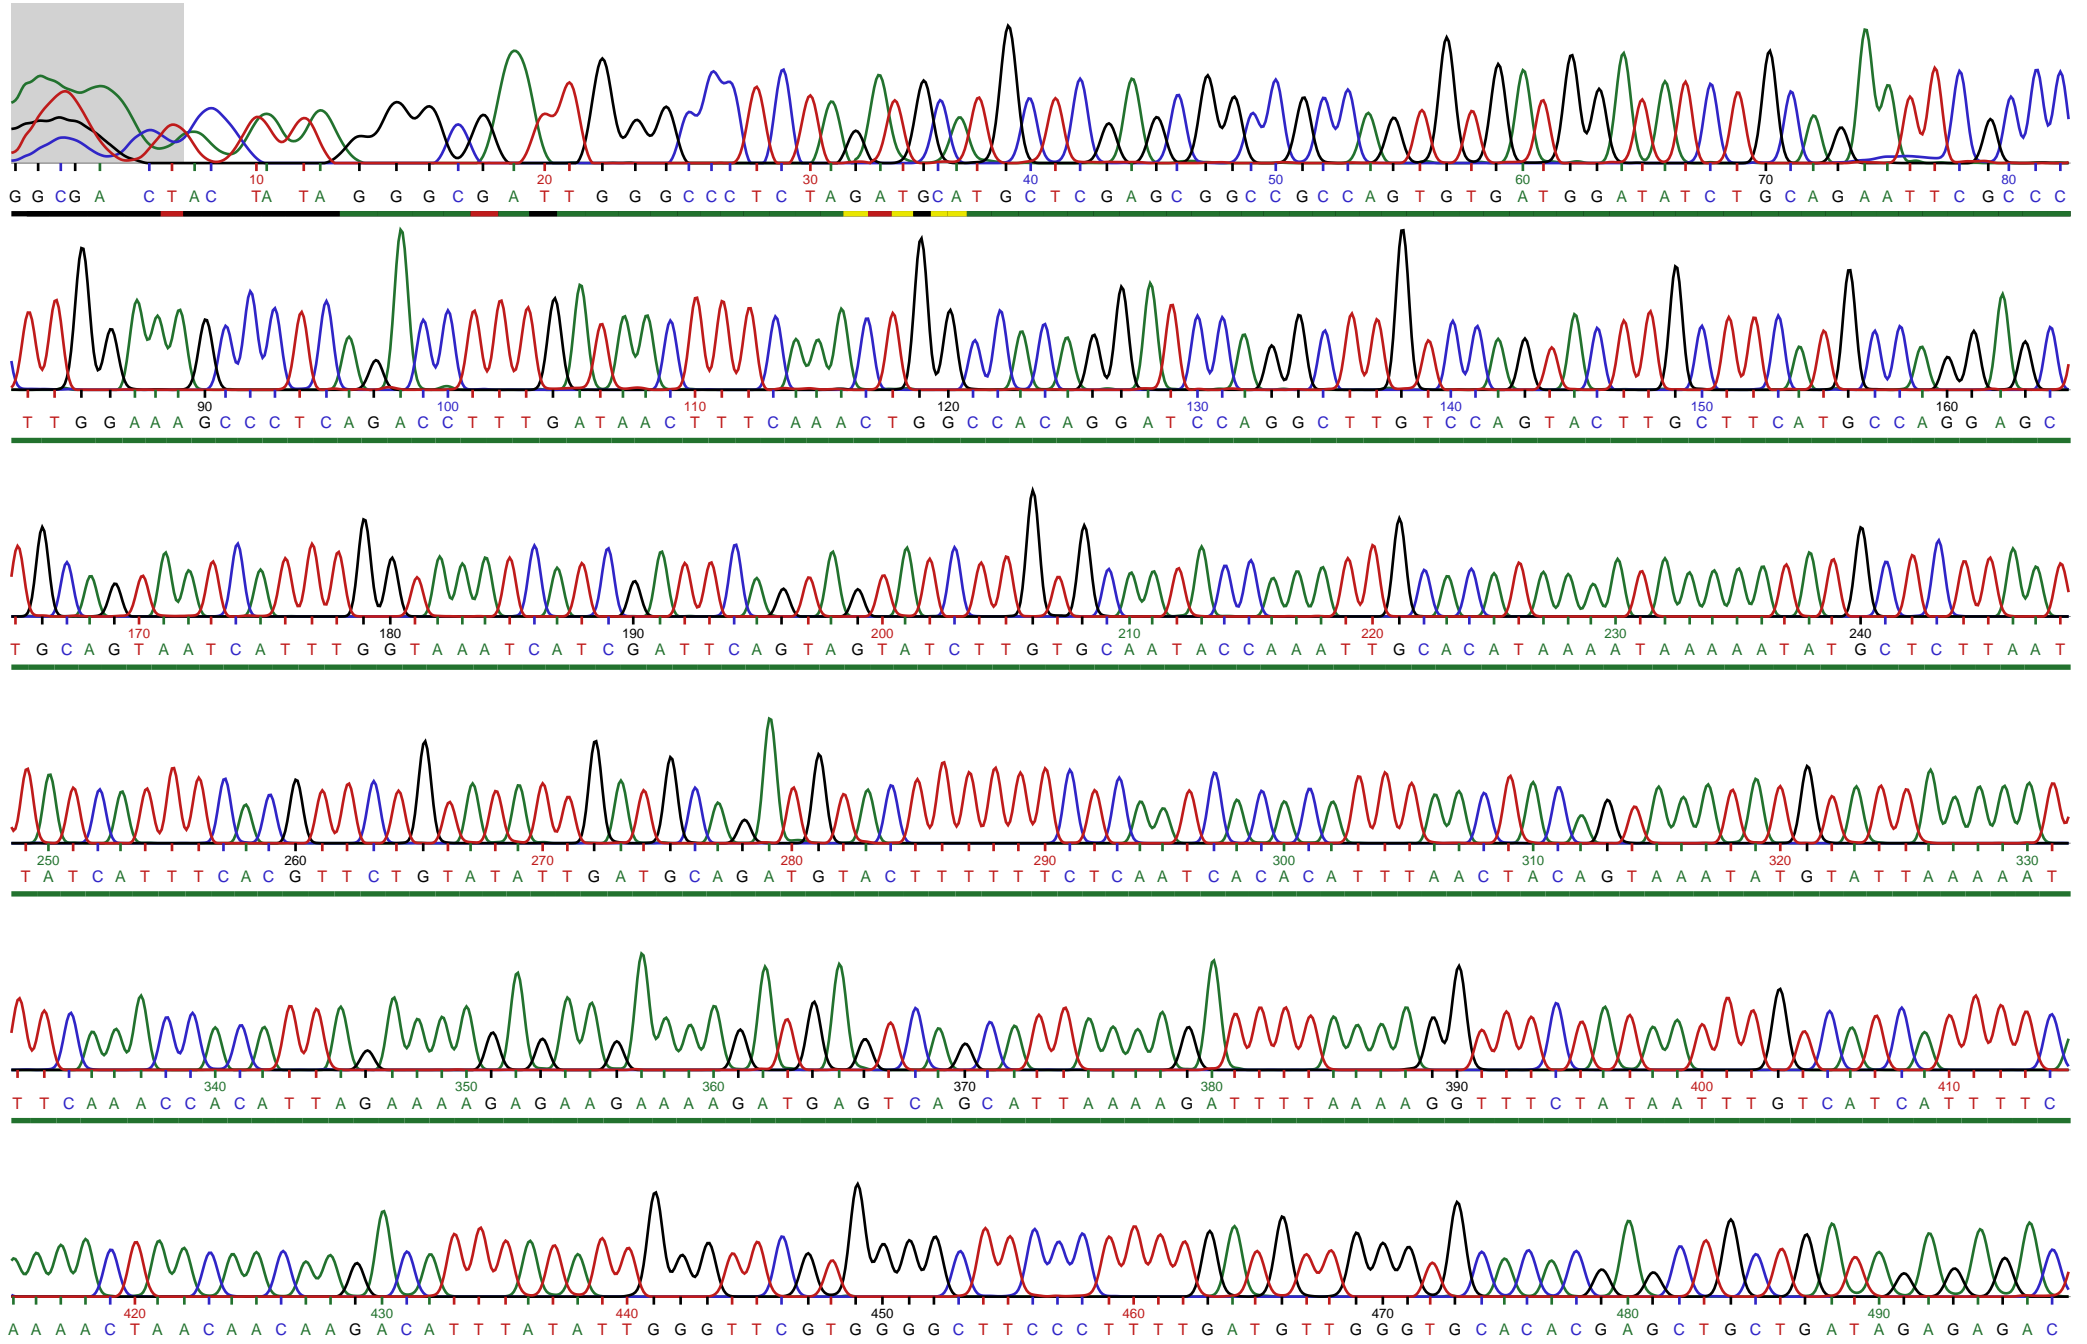

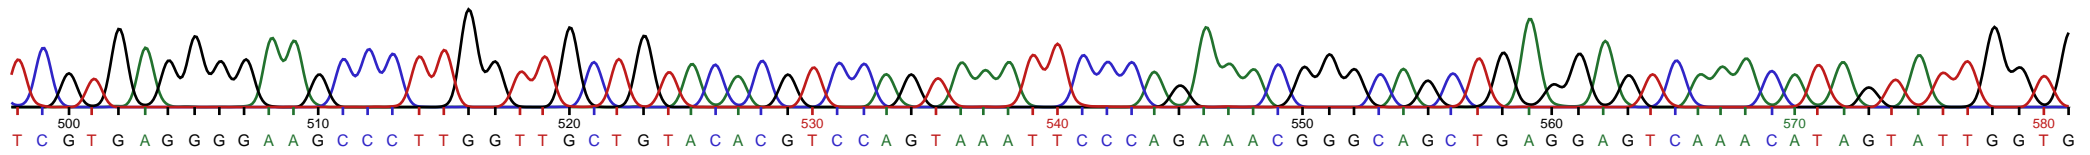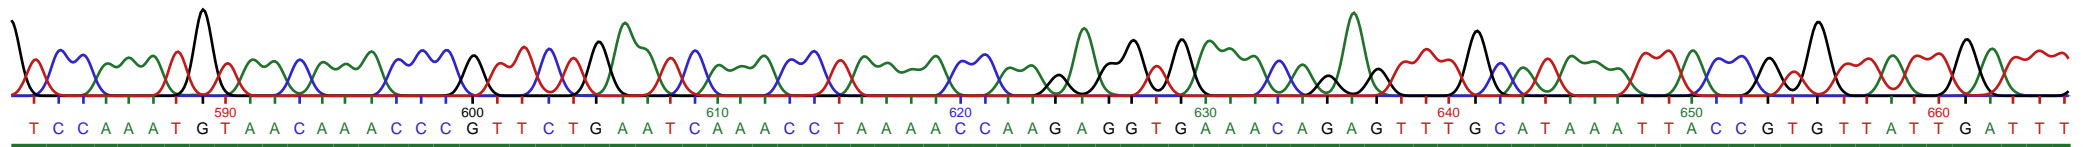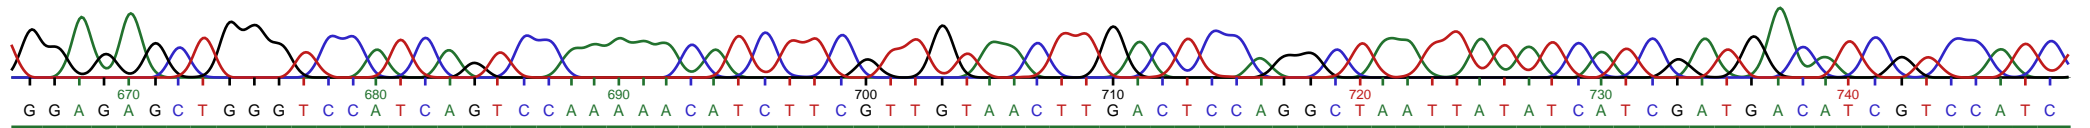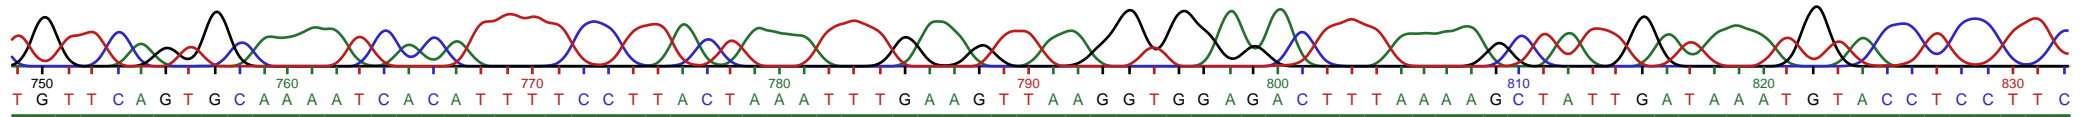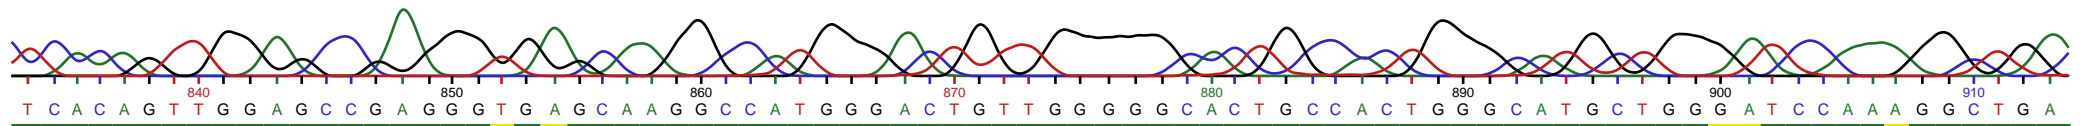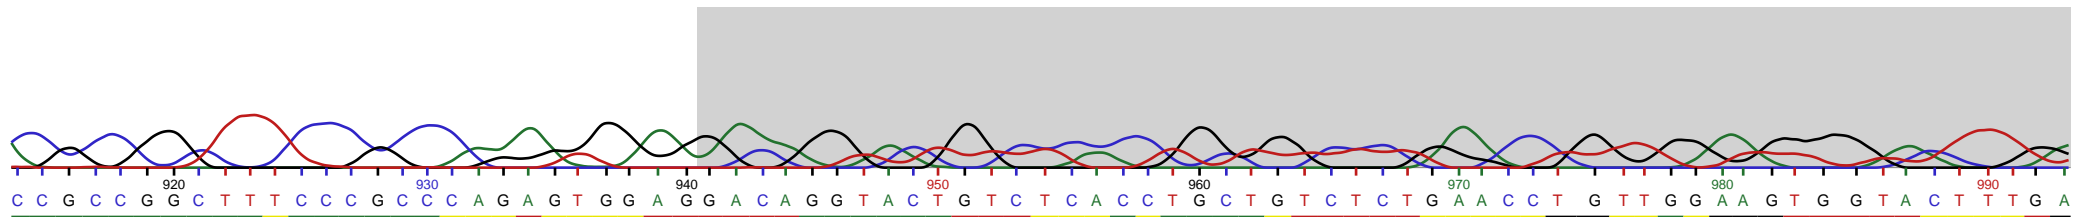

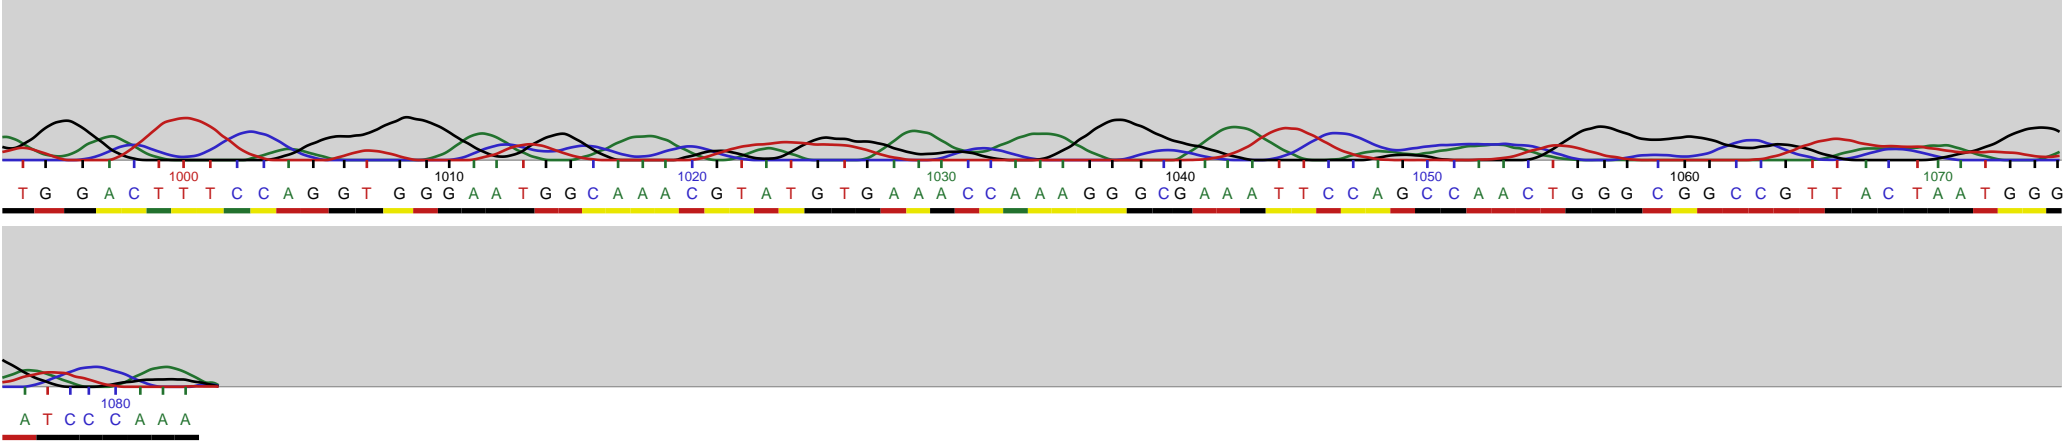

Supplement: fig1-figsupp3-data1 [file 11a_M13uni-21.pdf › Figure_1_figure_supplement_3_source_data/Figure_1_figure_supplement_3_panel_ABC_source_data/Originals_F1_sequencing/Fish_11/mitfa/mitfa #11a_M13uni-21.pdf]
