# Supplementary material for: Generation of a transparent killifish line through multiplex CRISPR/Cas9mediated gene inactivation
Source: eLife journal article supplement (doi:10.7554/elife.81549), 2023-02-23

Page: 1 / 2  
26.02.2018

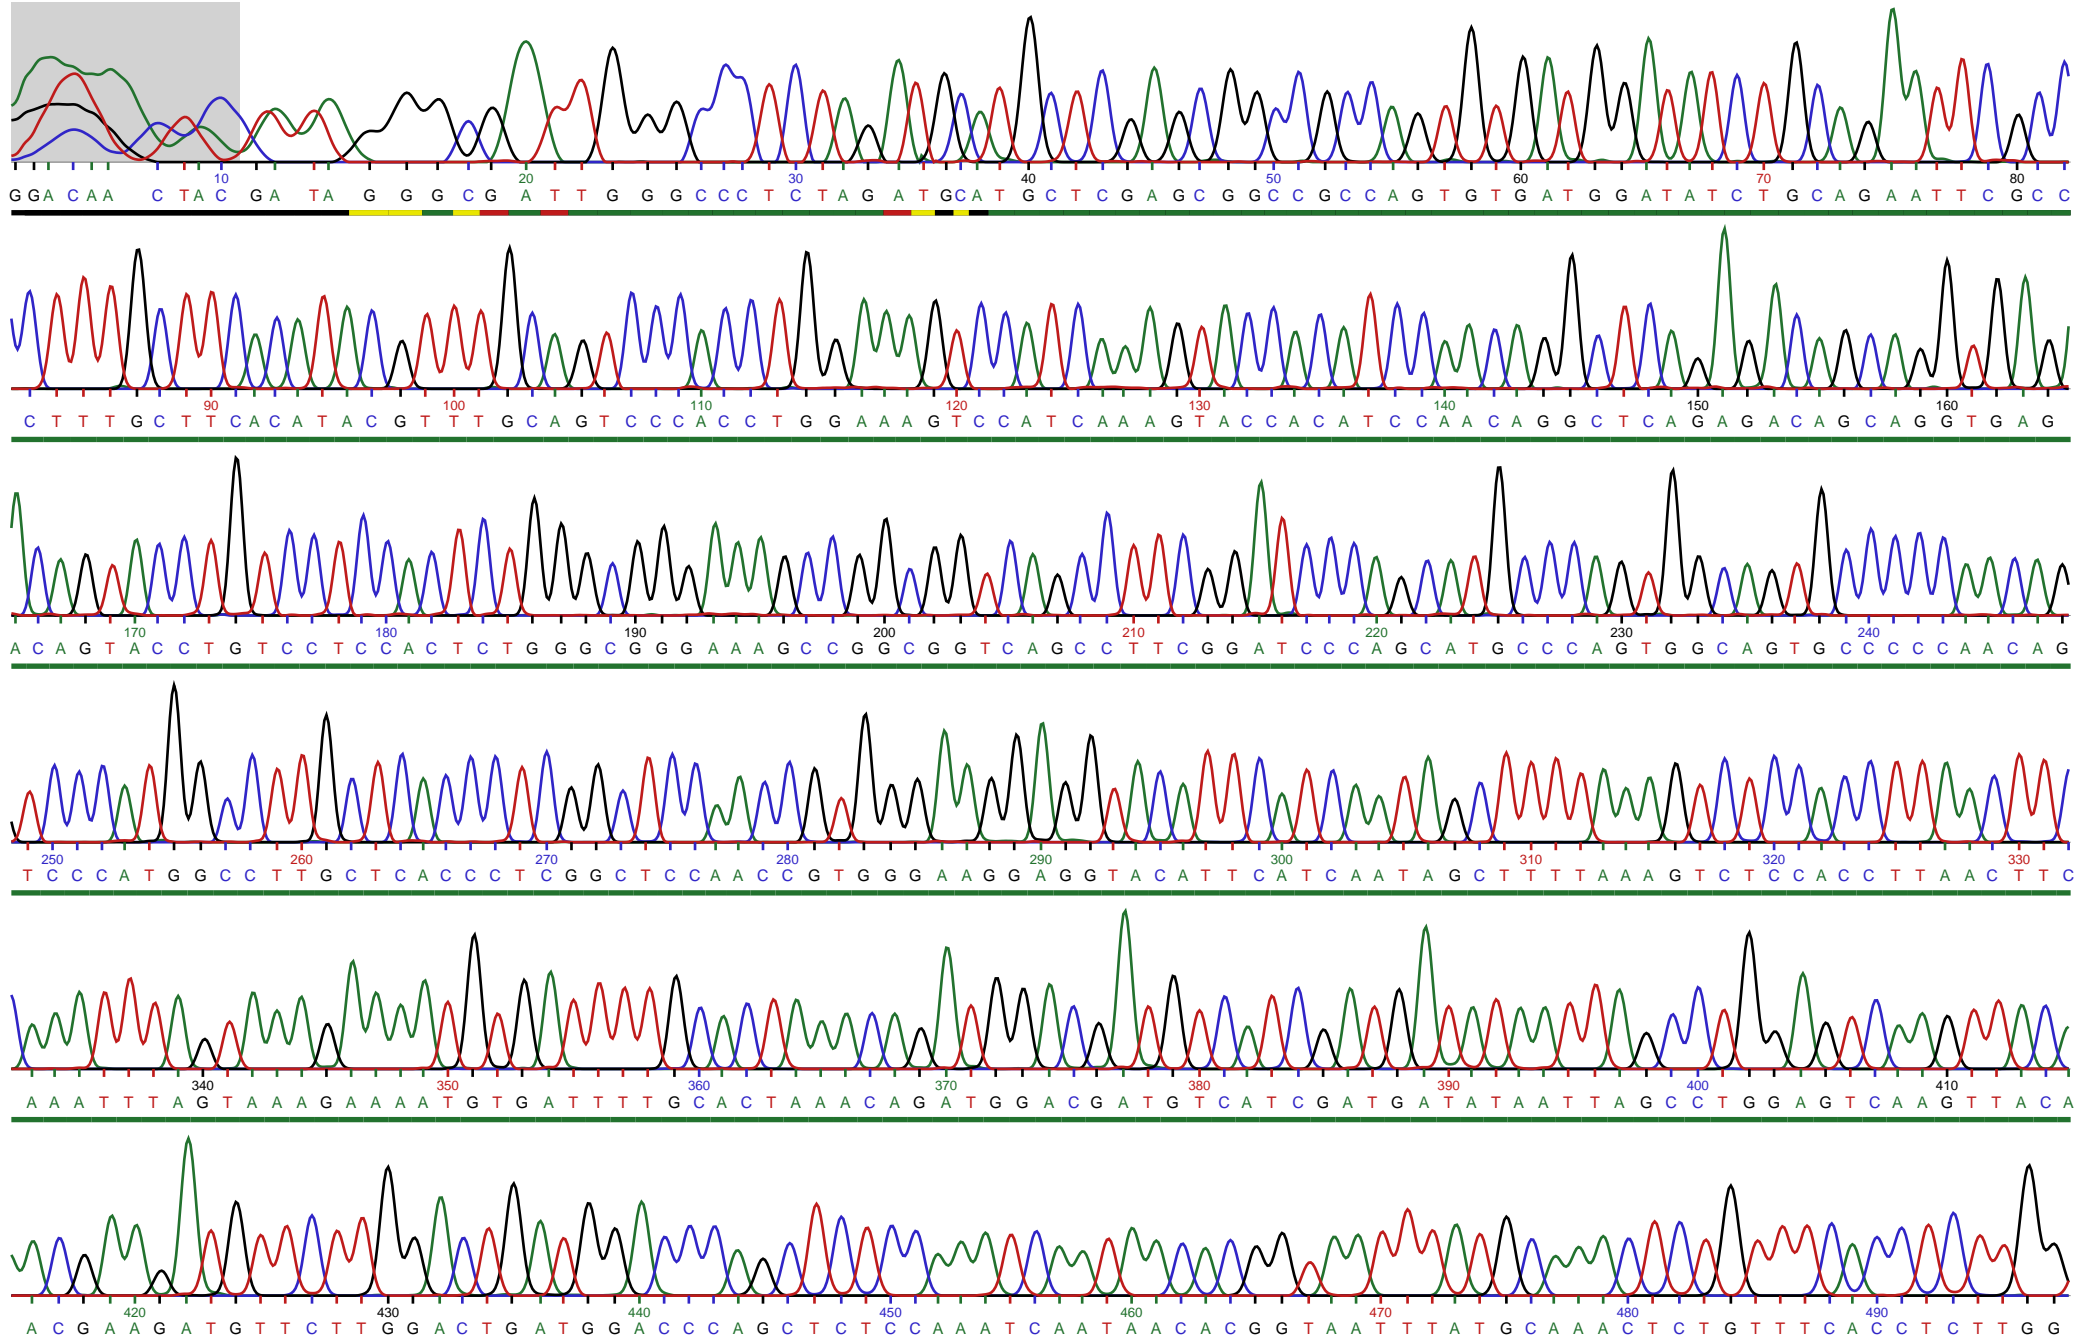

Clipped length: 912  
Left clip: 11  
Right clip: 922  
Avg. qual. in clip.: 51.75

Samples: 11859  
Bases: 989  
Average spacing: 12.0  
Average quality >= 10: 10, 20: 51, 30: 901

Quality: 0 - 9  
10 - 19  
20 - 29  
≥ 30

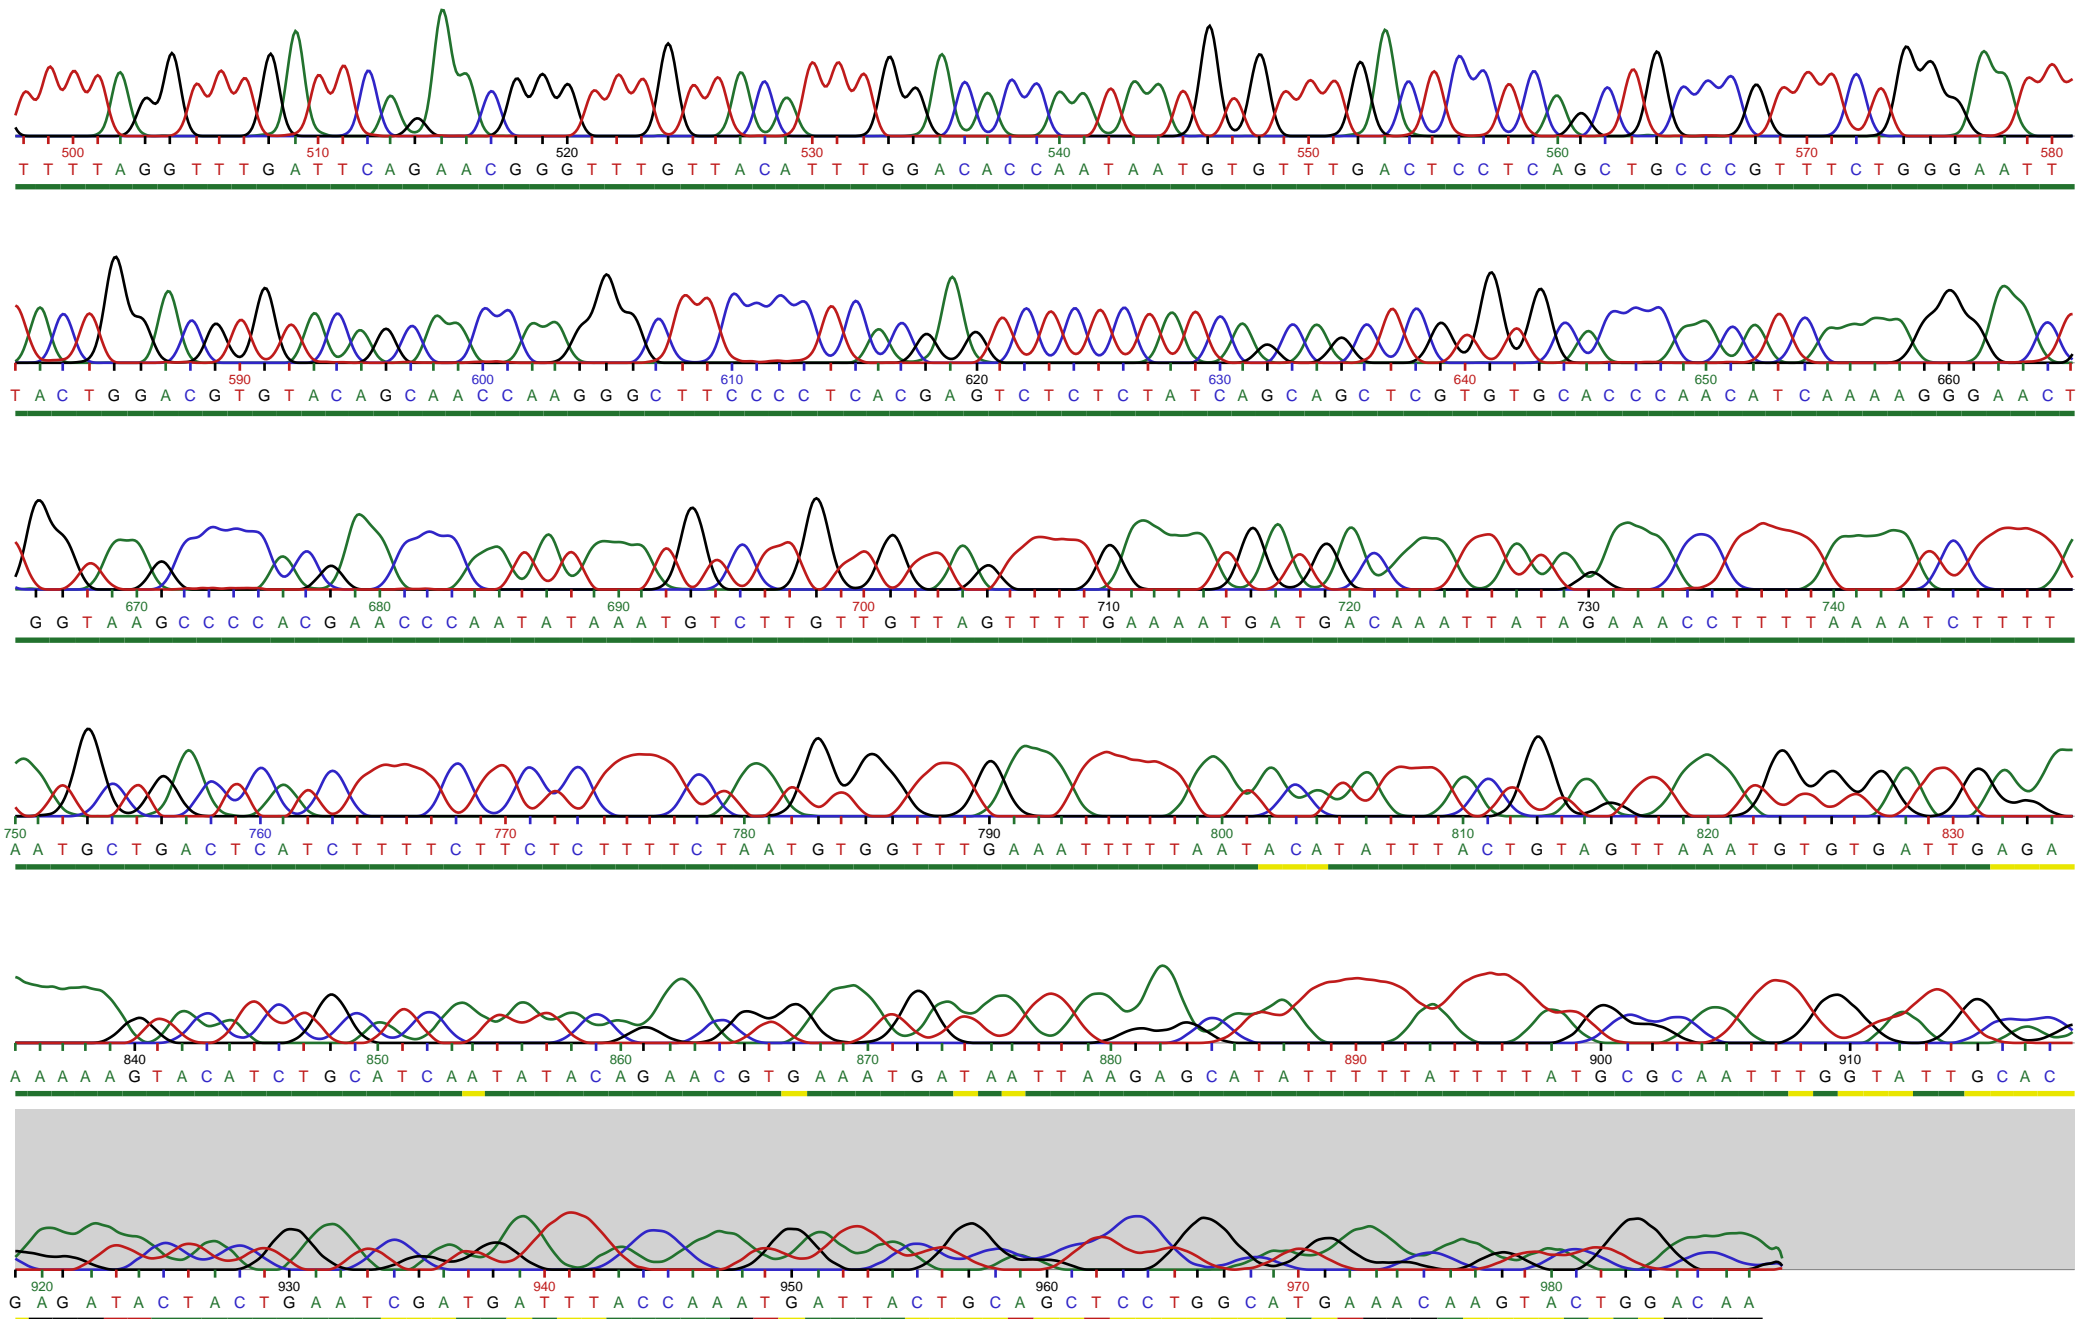

Supplement: fig1-figsupp3-data1 [file 19a_M13uni-21.pdf › Figure_1_figure_supplement_3_source_data/Figure_1_figure_supplement_3_panel_ABC_source_data/Originals_F1_sequencing/Fish_19/mitfa/mitfa #19a_M13uni-21.pdf]
