# Supplementary material for: Generation of a transparent killifish line through multiplex CRISPR/Cas9mediated gene inactivation
Source: eLife journal article supplement (doi:10.7554/elife.81549), 2023-02-23

Clip: 1 BQ 20 WL 10 Sequence: Itk #19b\_M13uni-21

Clipped length: 974  
Left clip: 12  
Right clip: 985  
Avg. qual. in clip.: 51.94

Samples: 11940  
Bases: 994  
Average spacing: 13.0  
Average quality >= 10: 8, 20: 28, 30: 940

Quality: 0 - 9  
10 - 19  
20 - 29  
≥ 30

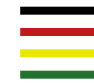

Page: 1 / 2  
26.02.2018

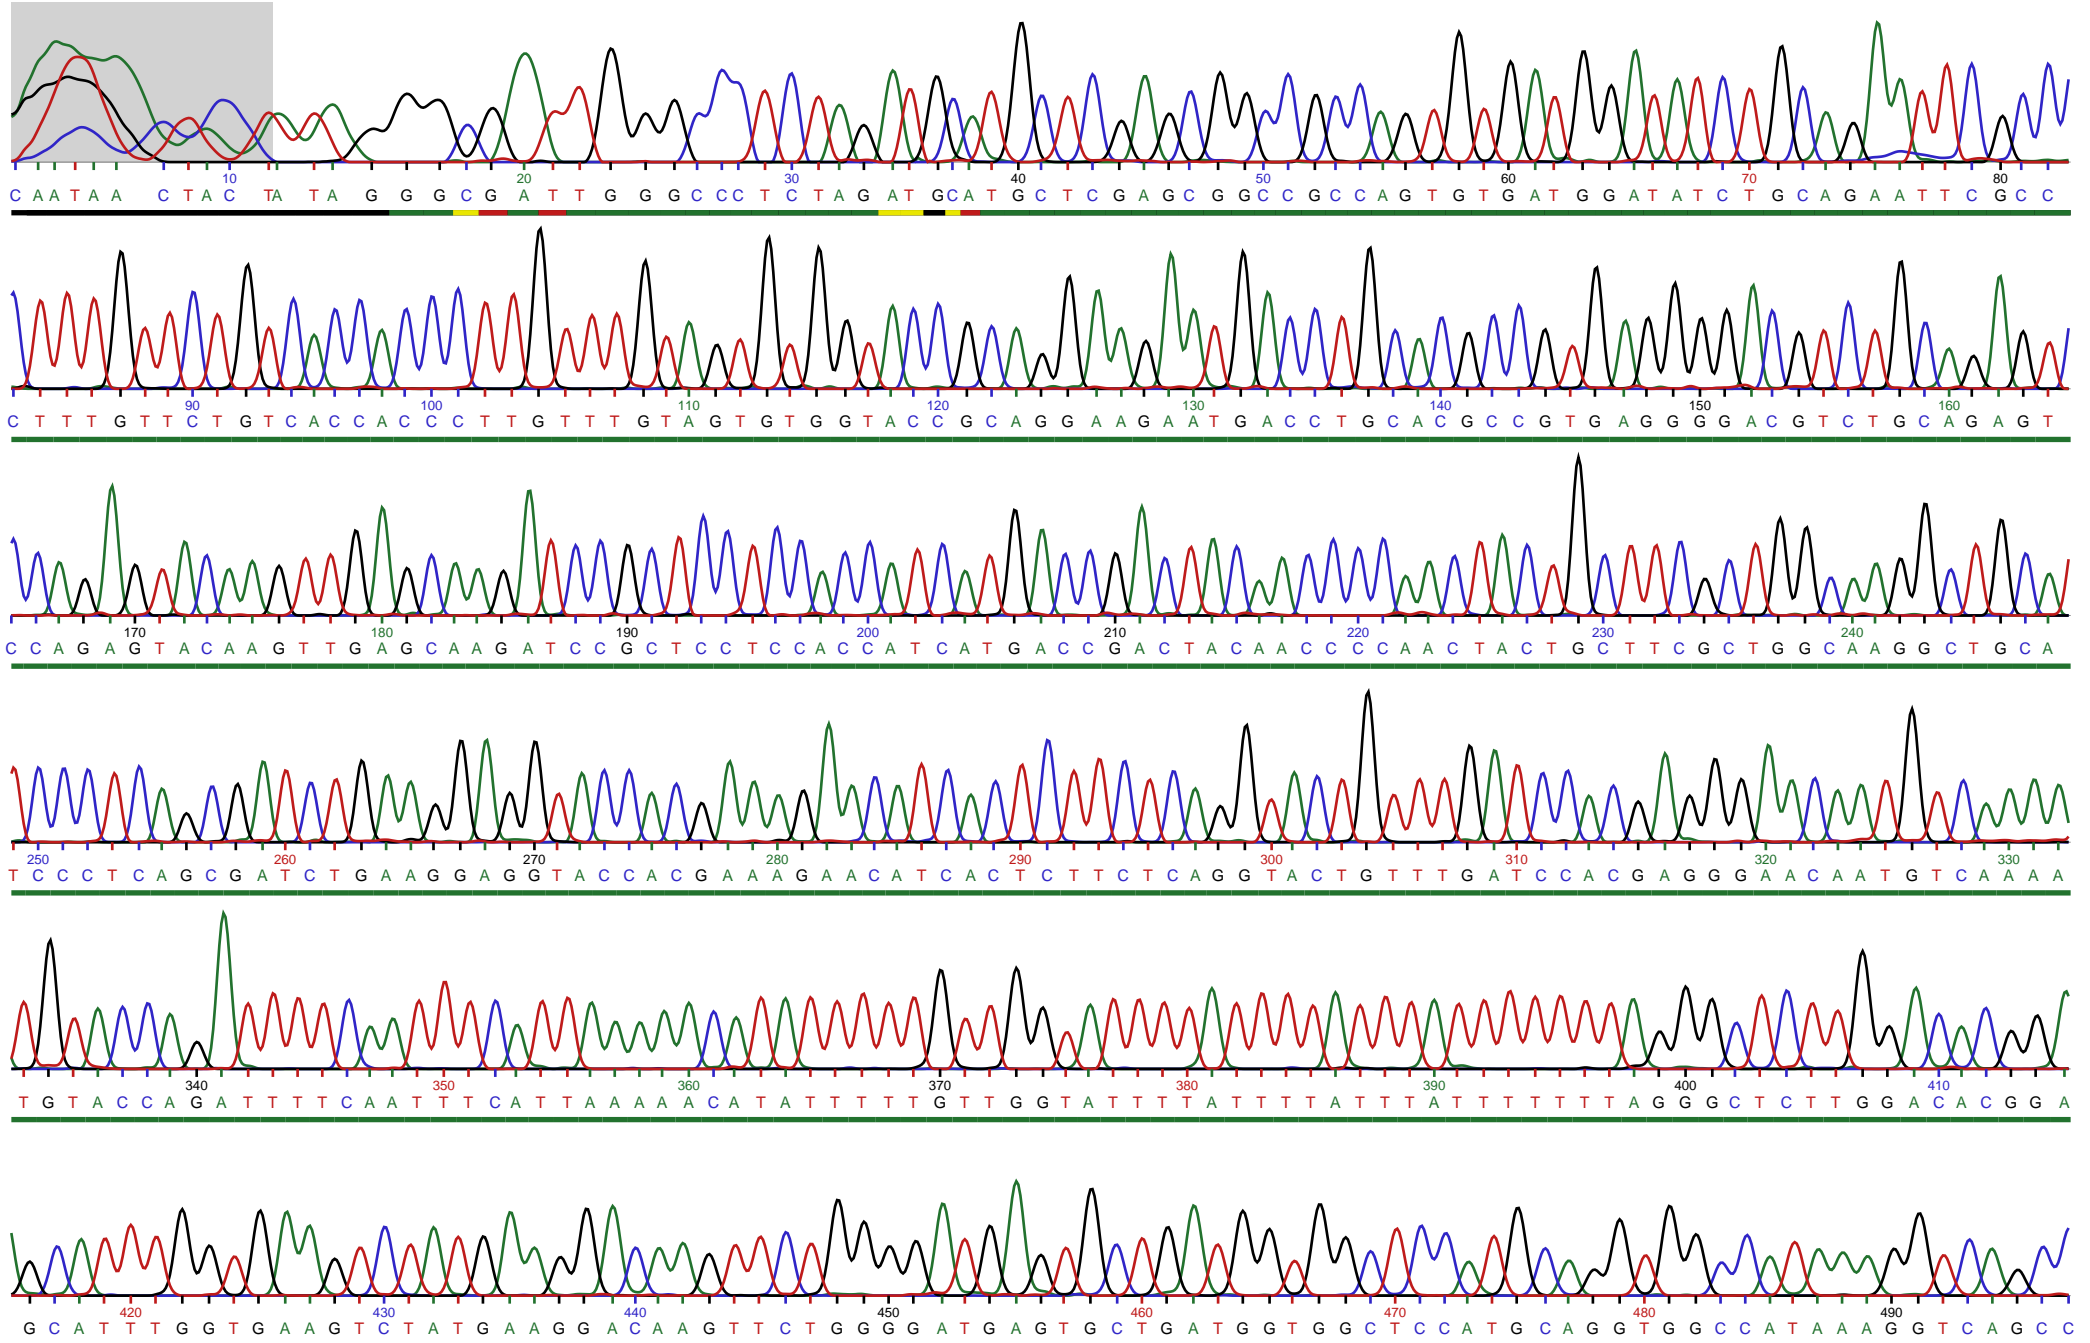

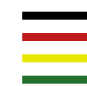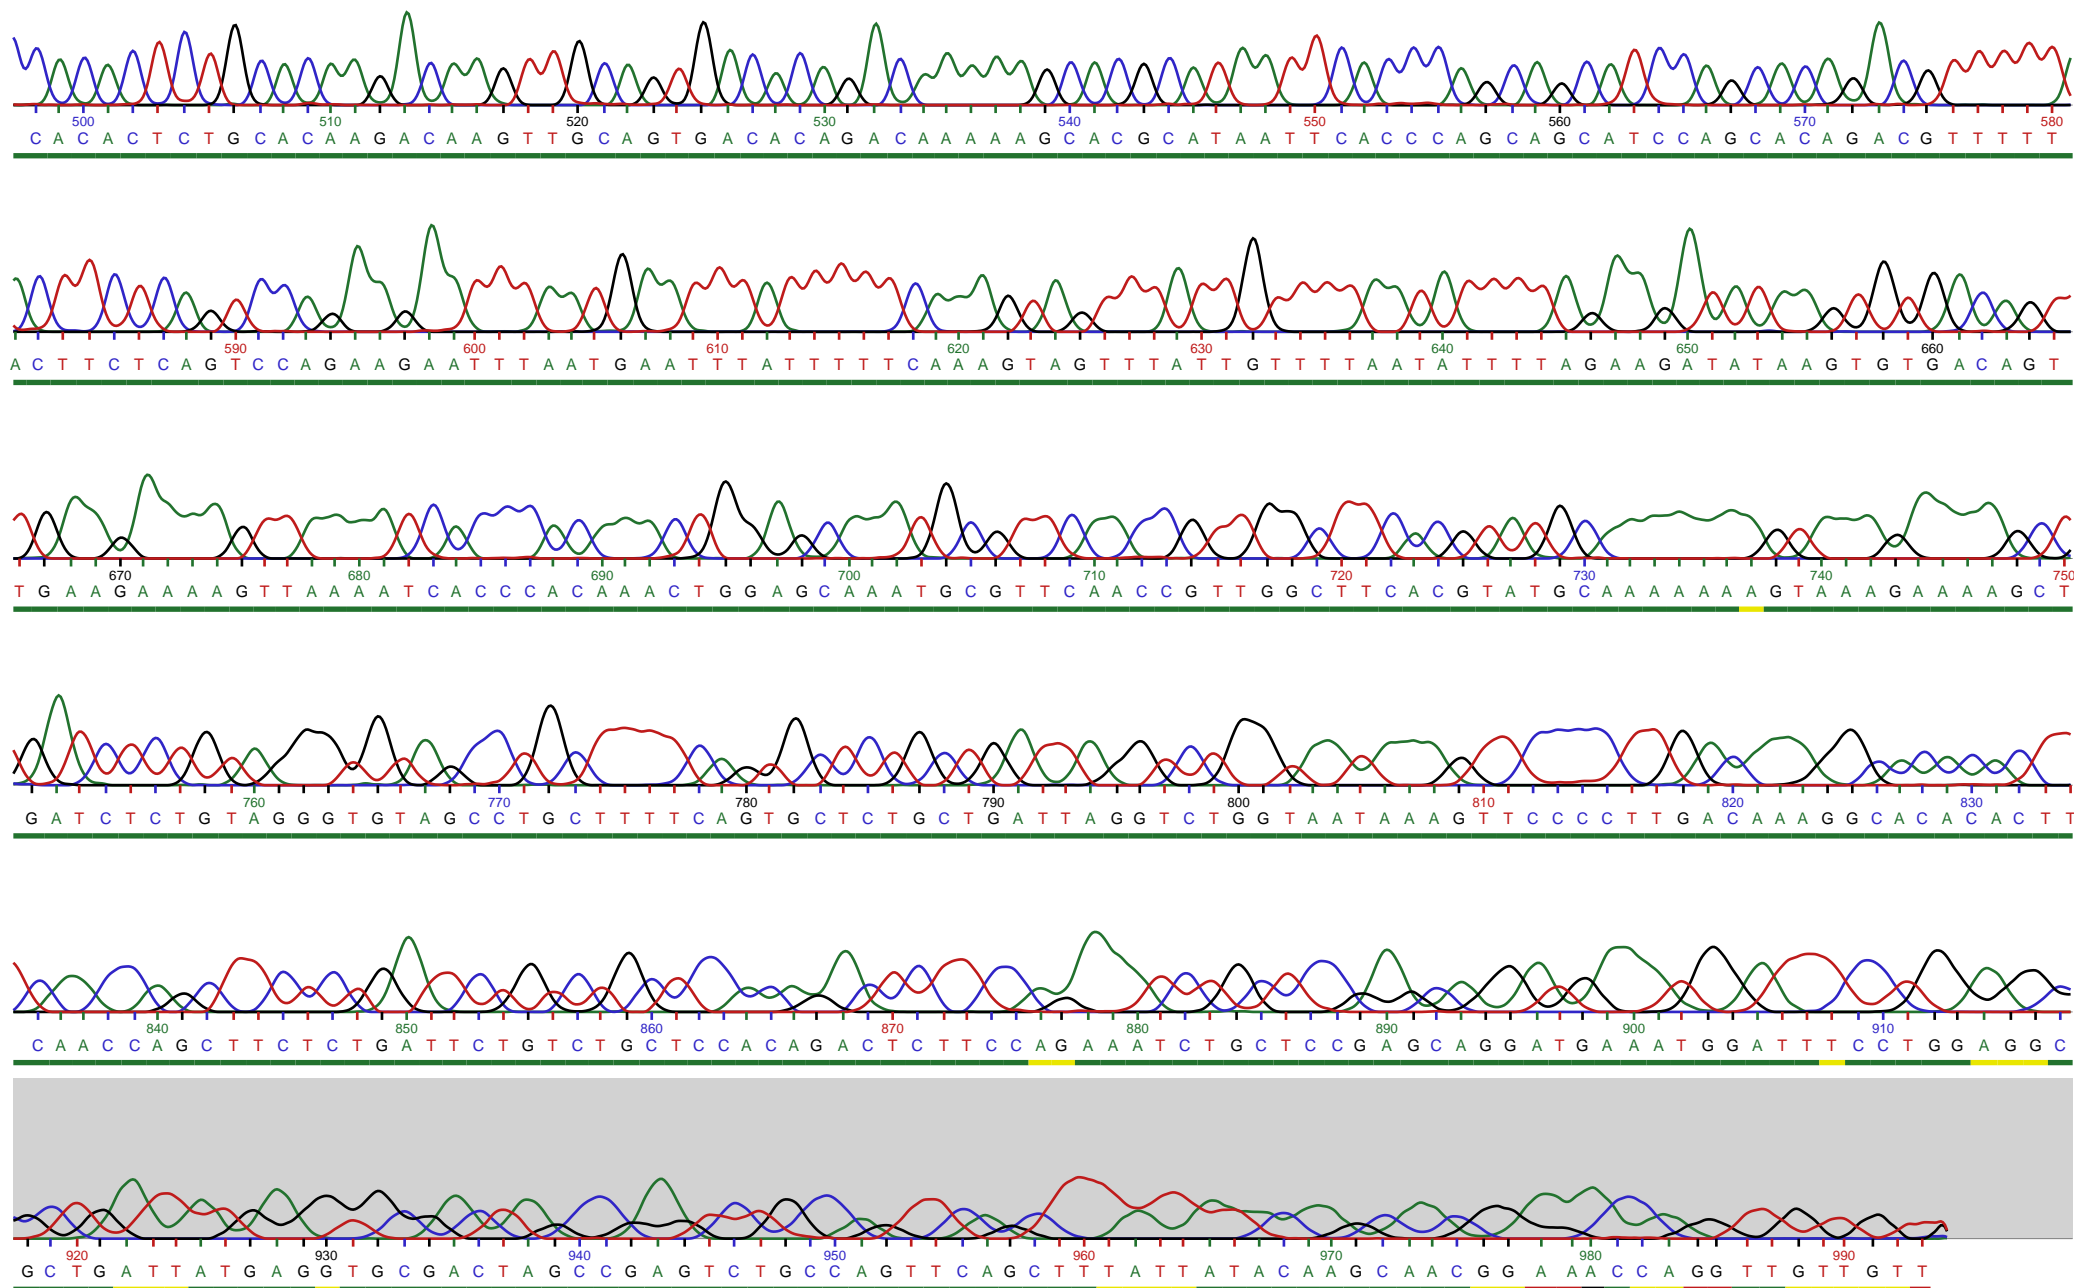

Supplement: fig1-figsupp3-data1 [file 19b_M13uni-21.pdf › Figure_1_figure_supplement_3_source_data/Figure_1_figure_supplement_3_panel_ABC_source_data/Originals_F1_sequencing/Fish_19/ltk/ltk #19b_M13uni-21.pdf]
