# Supplementary material for: Generation of a transparent killifish line through multiplex CRISPR/Cas9mediated gene inactivation
Source: eLife journal article supplement (doi:10.7554/elife.81549), 2023-02-23

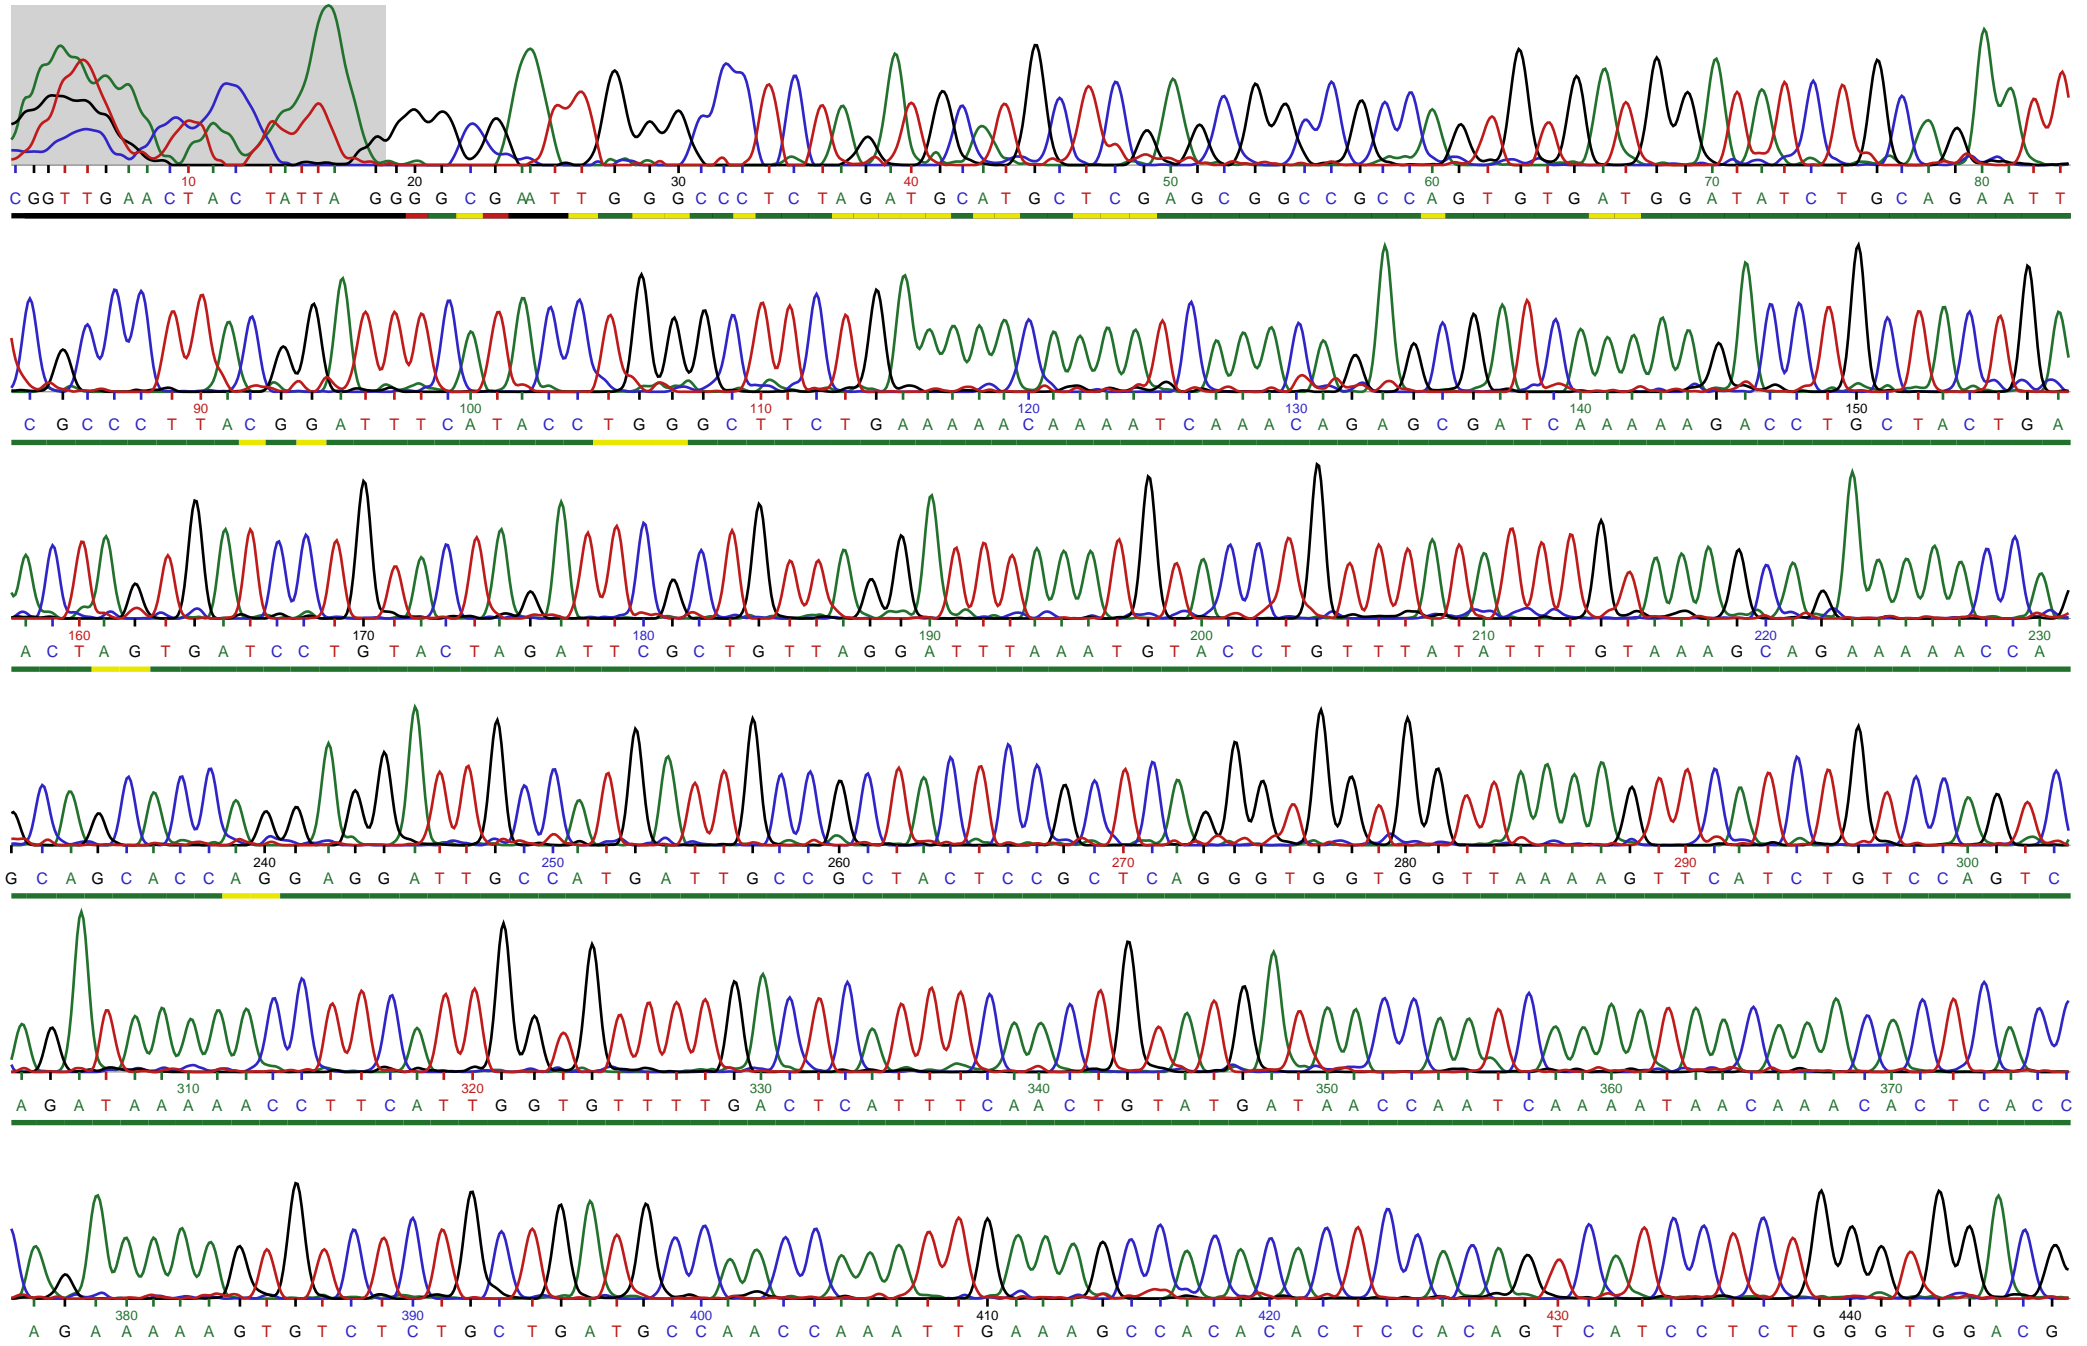

|                      |       |
|----------------------|-------|
| Clipped length:      | 739   |
| Left clip:           | 19    |
| Right clip:          | 757   |
| Avg. qual. in clip.: | 44.49 |

Samples: 15351  
Bases: 1173  
Average spacing: 14.0  
Average quality >= 10: 138, 20: 238, 30: 663

Quality: 0 - 9  
10 - 19  
20 - 29  
≥ 30

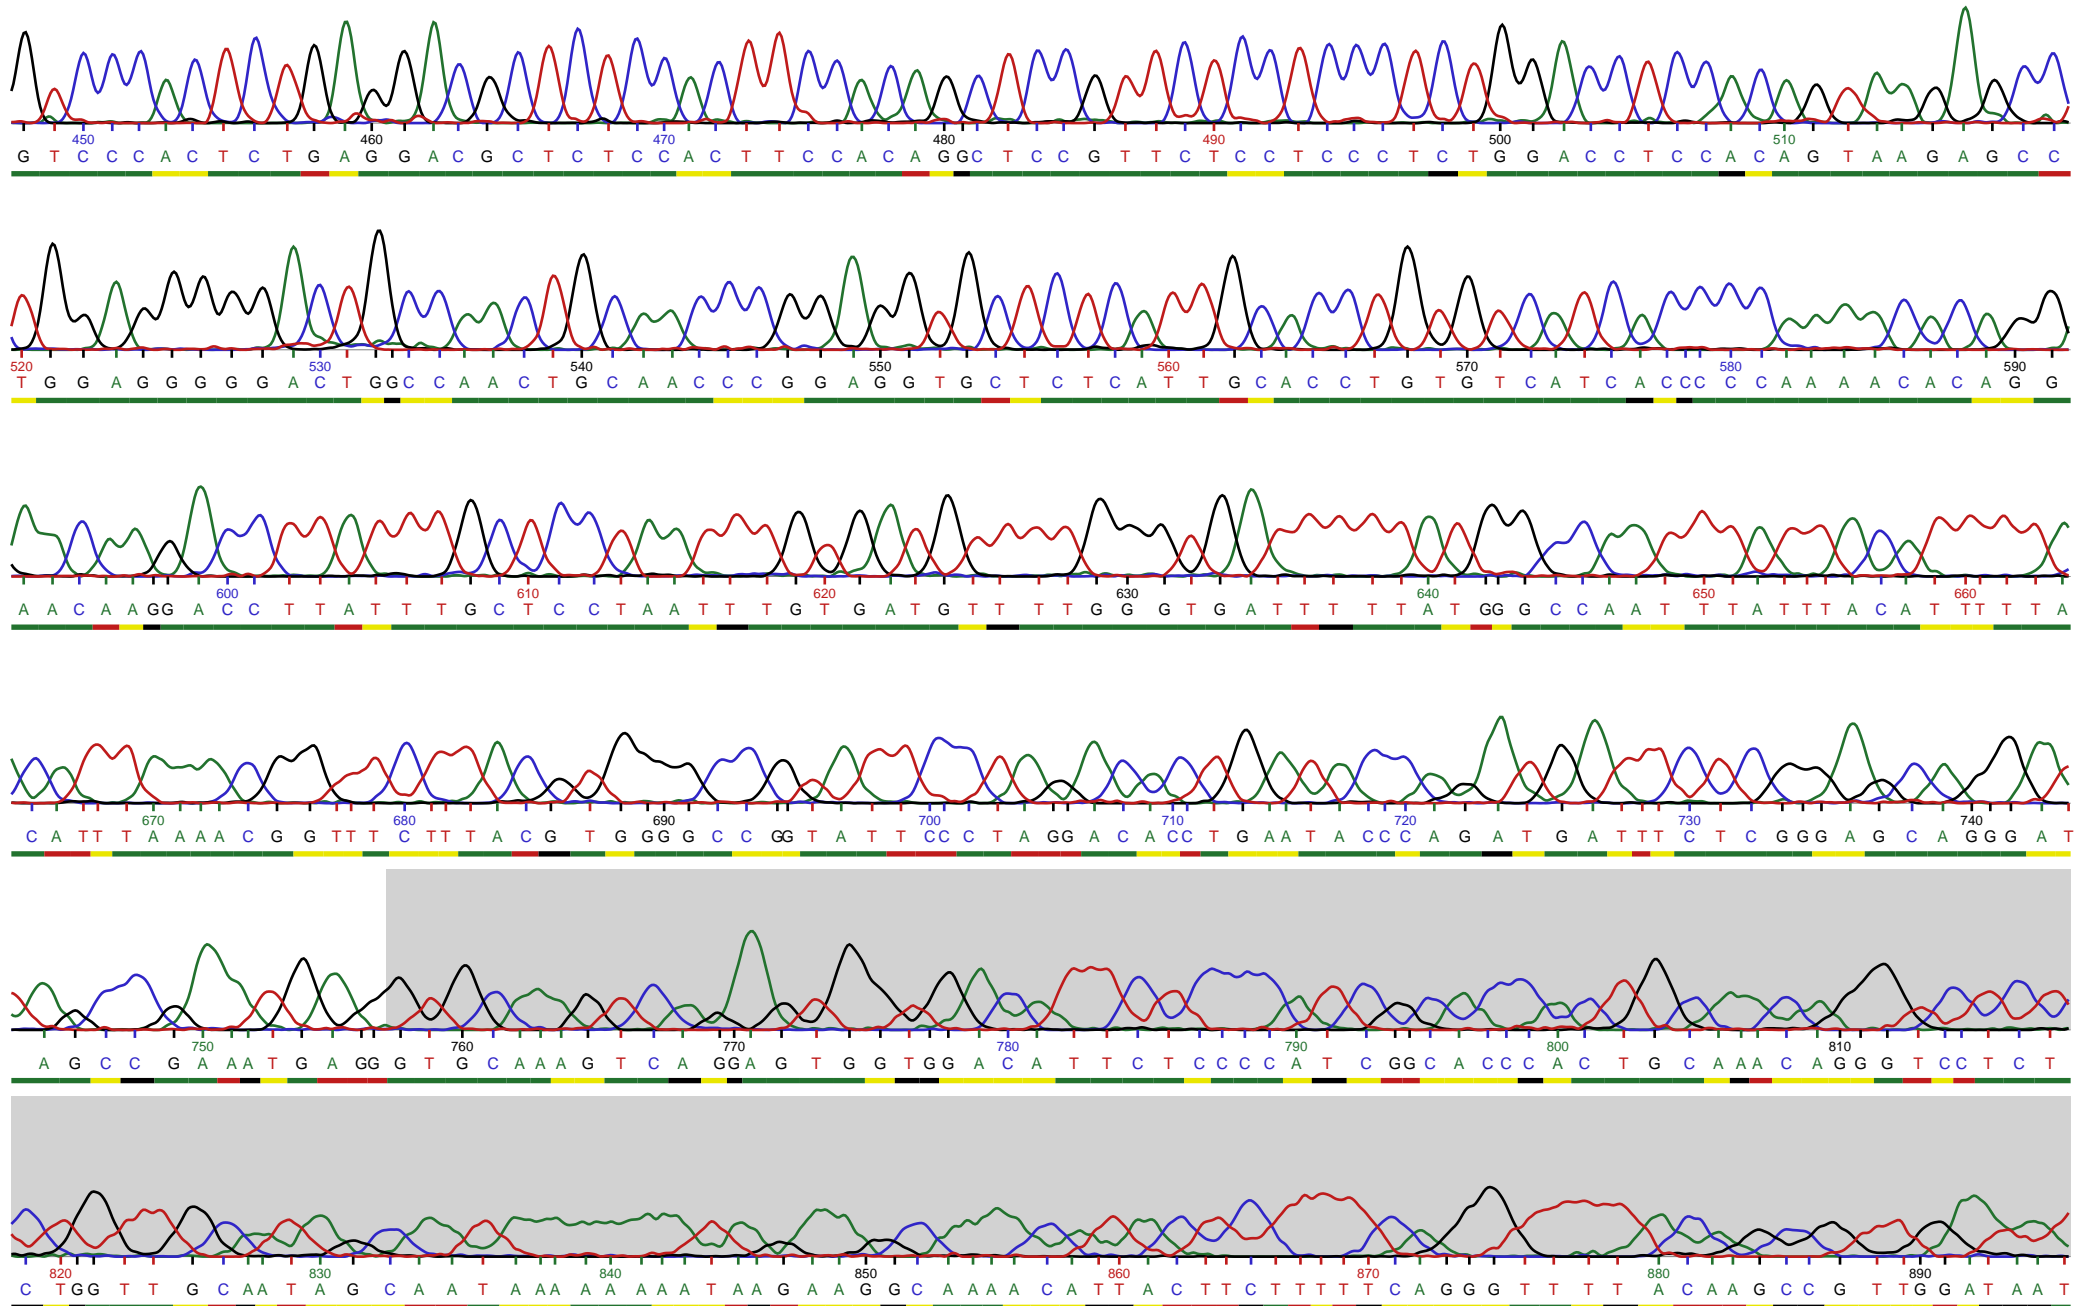

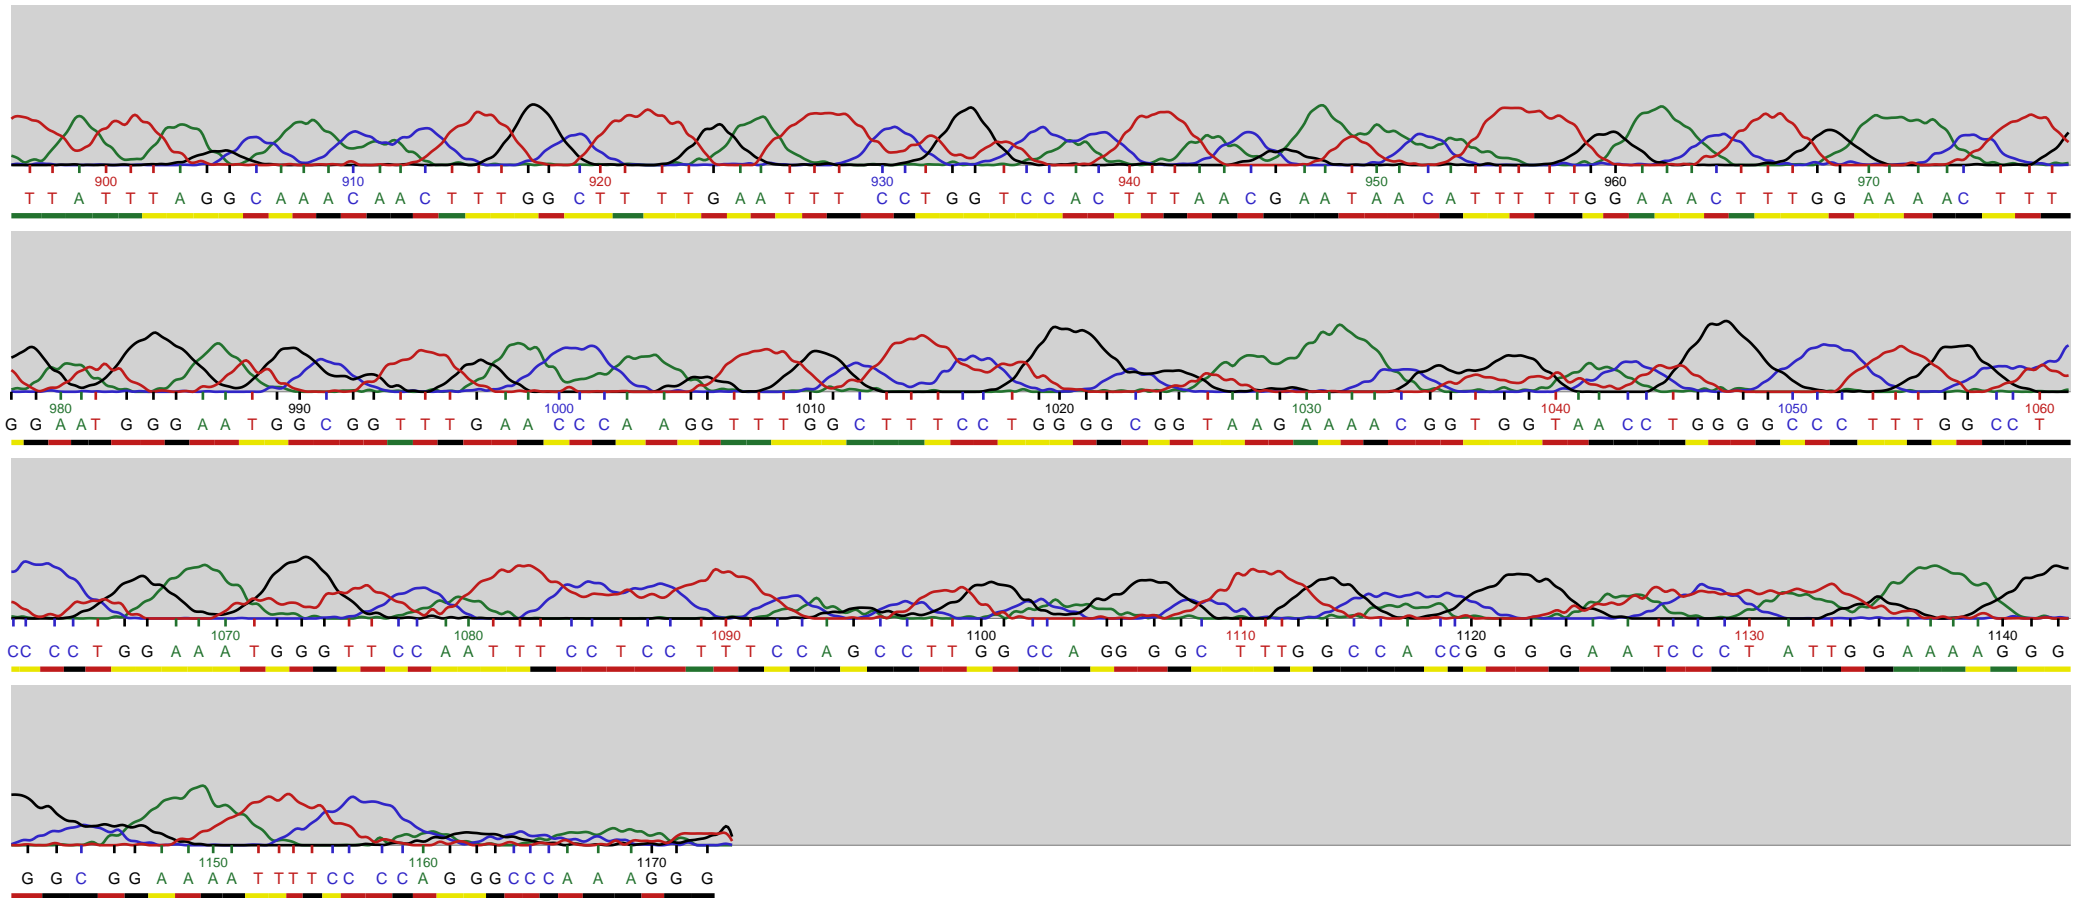

Supplement: fig1-figsupp3-data1 [file 19g_M13uni-21.pdf › Figure_1_figure_supplement_3_source_data/Figure_1_figure_supplement_3_panel_ABC_source_data/Originals_F1_sequencing/Fish_19/csf1ra/csf #19g_M13uni-21.pdf]
