# Supplementary material for: Generation of a transparent killifish line through multiplex CRISPR/Cas9mediated gene inactivation
Source: eLife journal article supplement (doi:10.7554/elife.81549), 2023-02-23

Clip: 1 BQ 20 WL 10 Sequence: csf #29c\_M13uni-21

Clipped length: 936  
Left clip: 17  
Right clip: 952  
Avg. qual. in clip.: 50.79

Samples: 12695  
Bases: 1052  
Average spacing: 13.0  
Average quality >= 10: 37, 20: 75, 30: 890

Quality: 0 - 9  
10 - 19  
20 - 29  
≥ 30

Page: 1 / 3  
02.03.2018

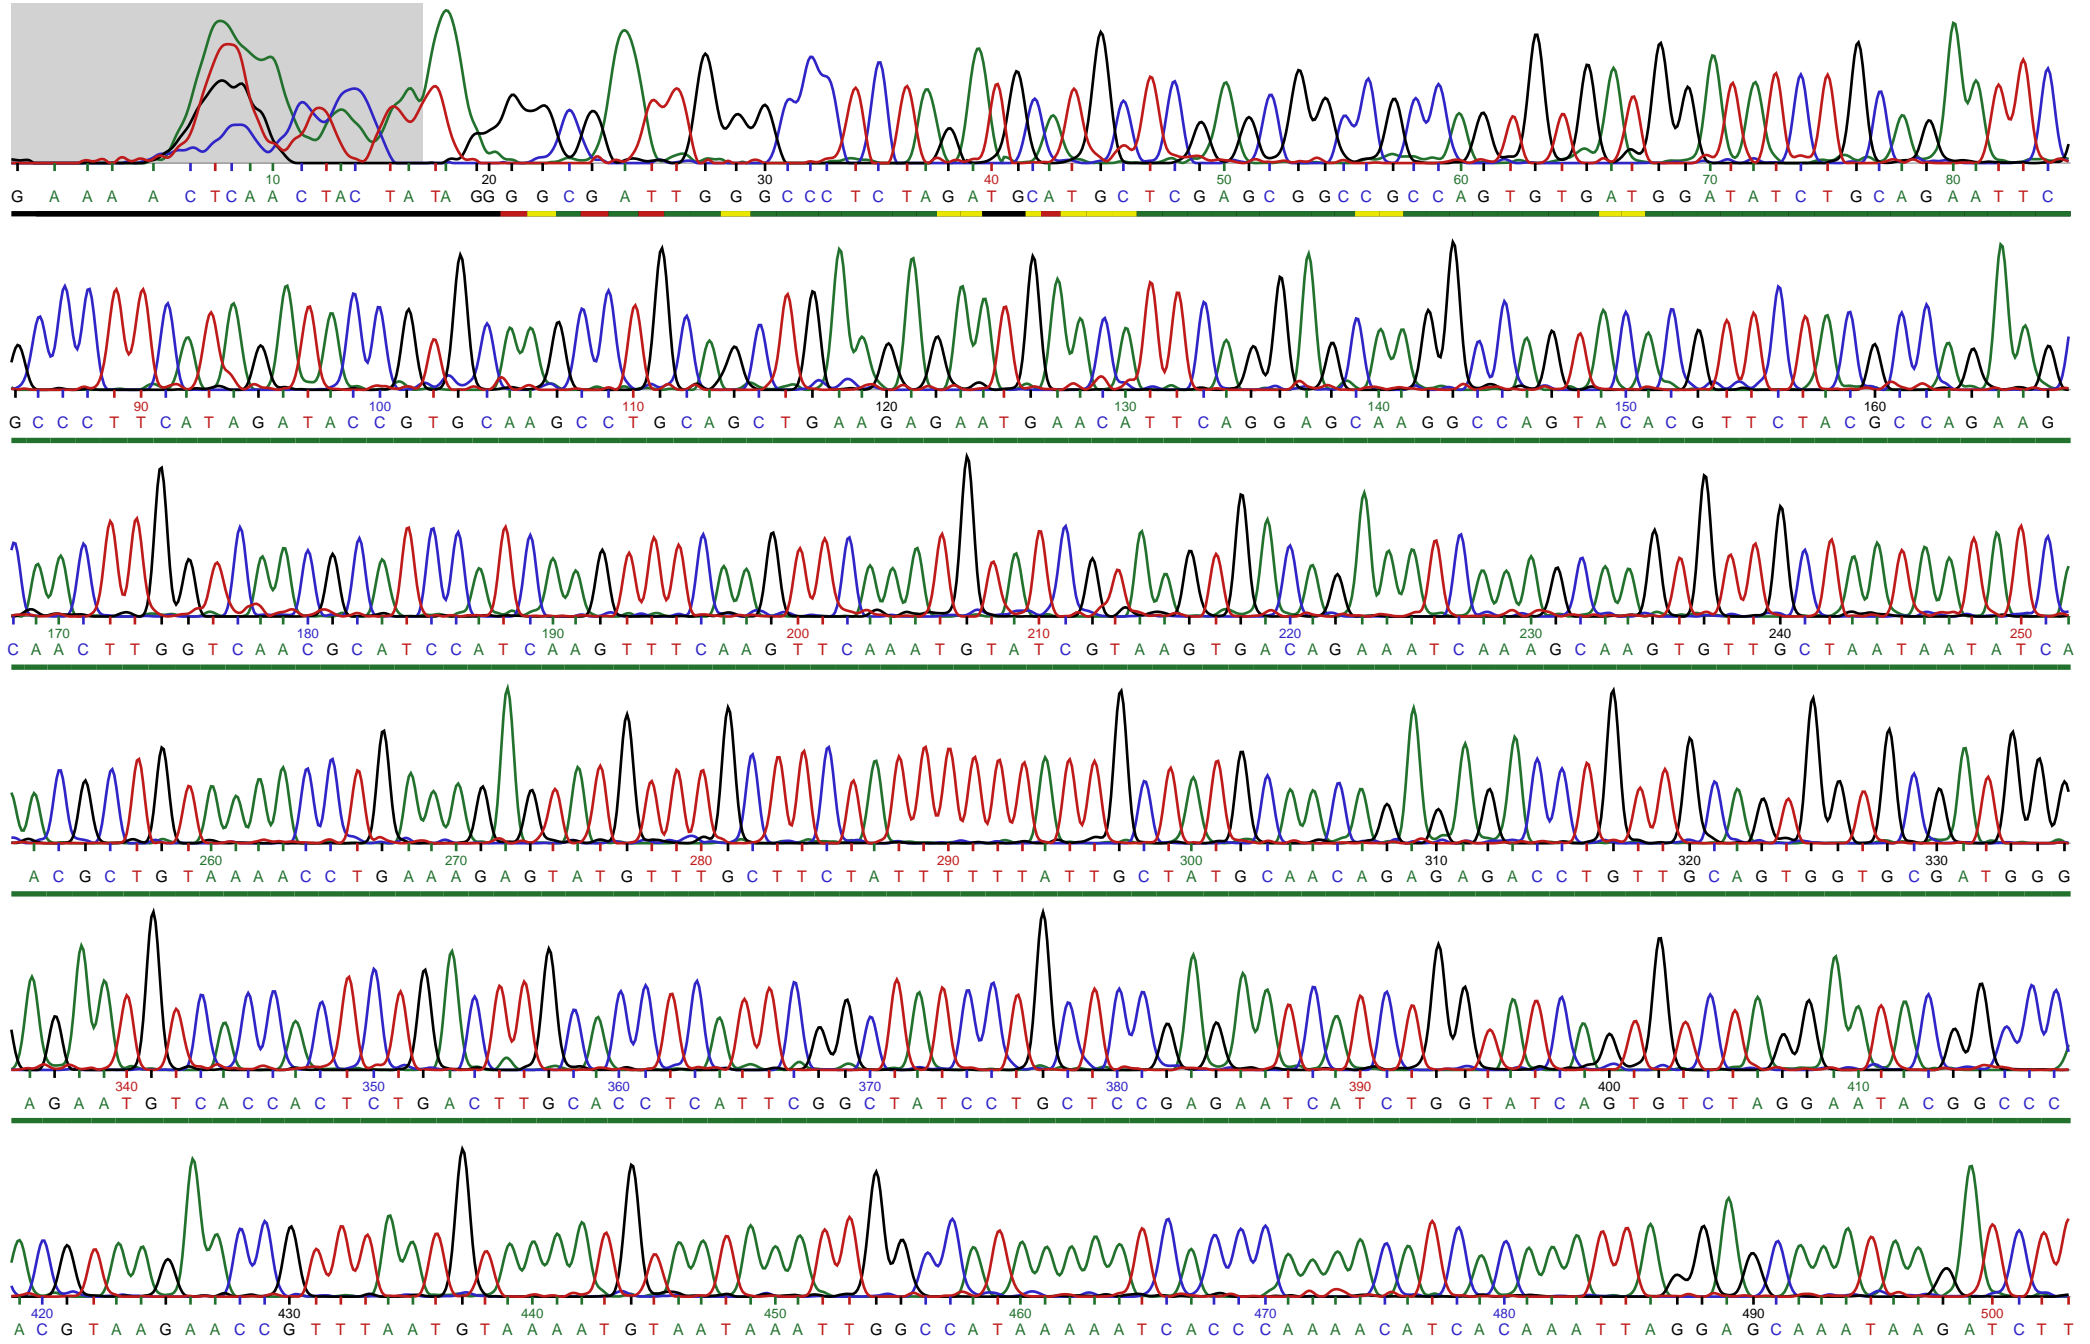

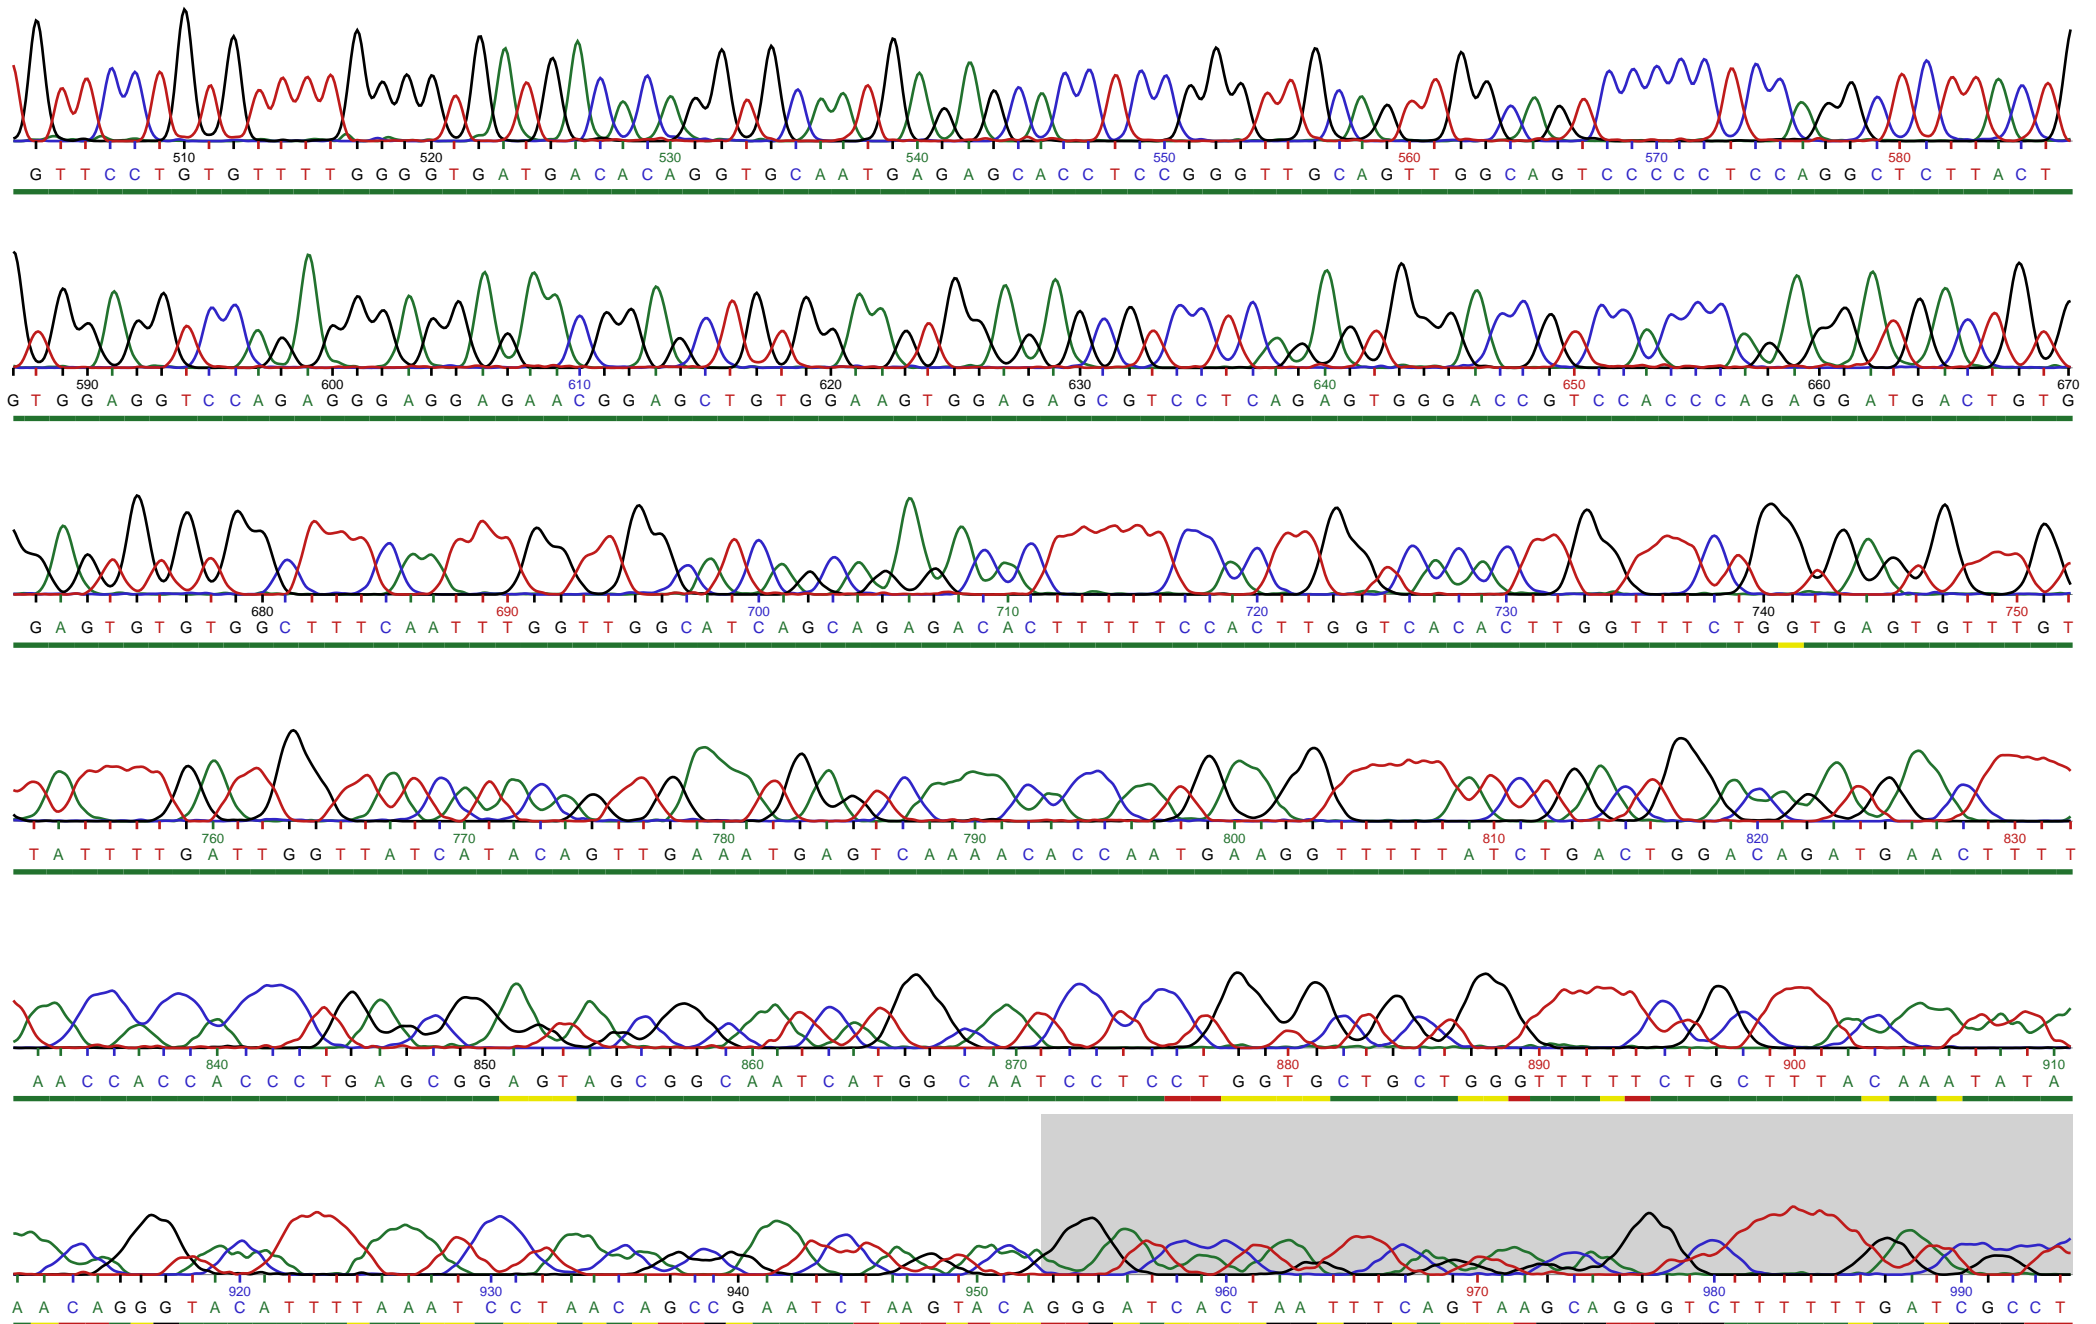

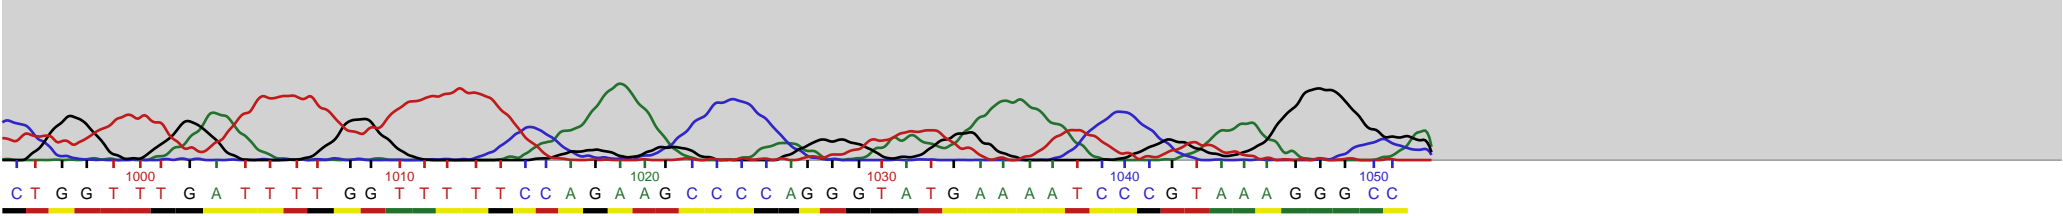

Supplement: fig1-figsupp3-data1 [file 29c_M13uni-21.pdf › Figure_1_figure_supplement_3_source_data/Figure_1_figure_supplement_3_panel_ABC_source_data/Originals_F1_sequencing/Fish_29/csf1ra/csf #29c_M13uni-21.pdf]
