# Supplementary material for: Generation of a transparent killifish line through multiplex CRISPR/Cas9mediated gene inactivation
Source: eLife journal article supplement (doi:10.7554/elife.81549), 2023-02-23
Supplement: fig1-figsupp3-data1 [file Figure_1_figure_supplement_1_panel_e_source_data.pdf › Figure_1_figure_supplement_3_source_data/Figure_1_figure_supplement_3_panel_EF_source_data/Figure_1_figure_supplement_1_panel_e_source_data.pdf]

# Supplement Figure 1

panel q

*mitfa*

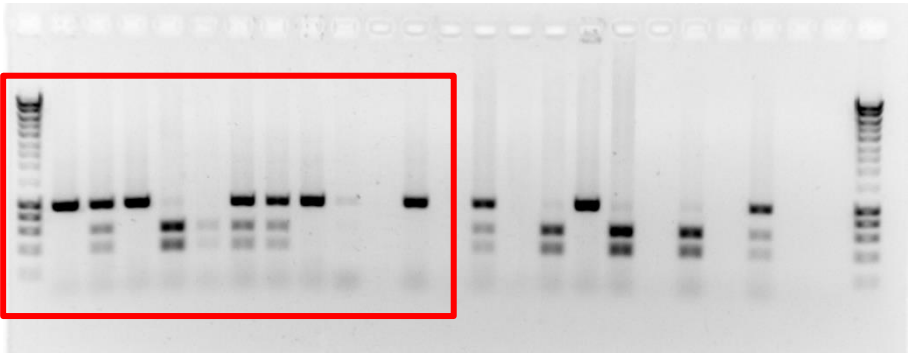

*ltk*

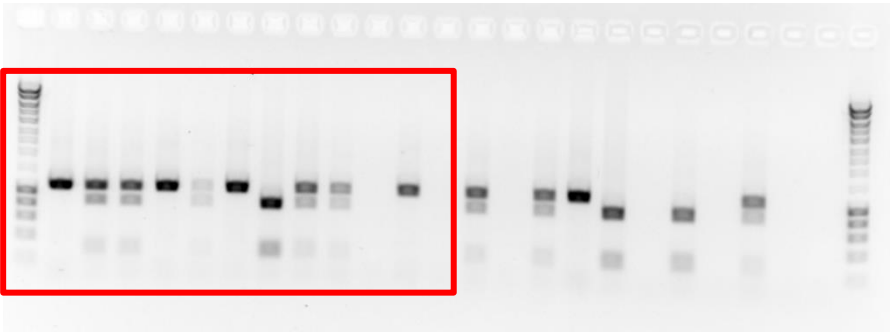

*csf1ra*

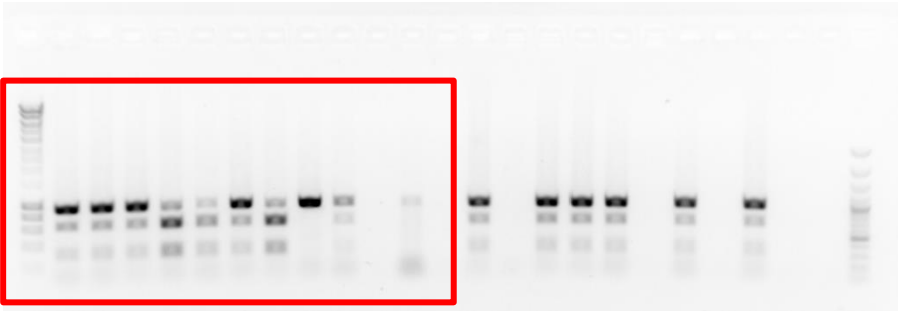

The red box surrounds the lanes shown in the respective panel.
