# Supplementary material for: Generation of a transparent killifish line through multiplex CRISPR/Cas9mediated gene inactivation
Source: eLife journal article supplement (doi:10.7554/elife.81549), 2023-02-23
Supplement: fig2-data1 [file FACS_analysis_WKM.xlsx]

## Sheet: Panel_22_E
FACS analysis: Whole kidney marrow
		lymphocytes	progenitors	myeloid cells			lymphocytes	progenitors	myeloid cells
	csf1ra+/+ (n = 2)	28.1	25.4	18.5		Average	41.6	18.6	18.2
		55.1	11.8	17.9		STDEV	19.0919	9.61665	0.424264
	csf1ra+/- (n = 4)	43.4	18.1	17.9		Average	46.55	17	16.05
		60.2	12.1	9.2		STDEV	12.9968	4.2	9.25365
		30	15.7	28.4
		52.6	22.1	8.7
	csf1ra-/- (n = 4)	37.3	17.2	24.1		Average	36.45	22.2	17.8
		45.4	22.5	11.3		STDEV	8.66891	3.48999	5.50091
		38.5	24.1	15.8
		24.6	25	20
	One Way Anova (https://astatsa.com/OneWay_Anova_with_TukeyHSD/_result/)
	Tukey HSD p values	P5	P6	P7
	+/+ vs +/-	0.8871122	0.8999947	0.8999947
	+/+ vs -/-	0.8772698	0.6957361	0.8999947
	+/- vs -/-	0.5219445	0.3725319	0.8999947
