# Supplementary material for: Generation of a transparent killifish line through multiplex CRISPR/Cas9mediated gene inactivation
Source: eLife journal article supplement (doi:10.7554/elife.81549), 2023-02-23
Supplement: fig2-data1 [file WKM_FACS_csf1ra_mutants.pdf › Figure_2_source_data/Figure_2_panel_B_source_data/WKM_FACS_csf1ra_mutants.pdf]

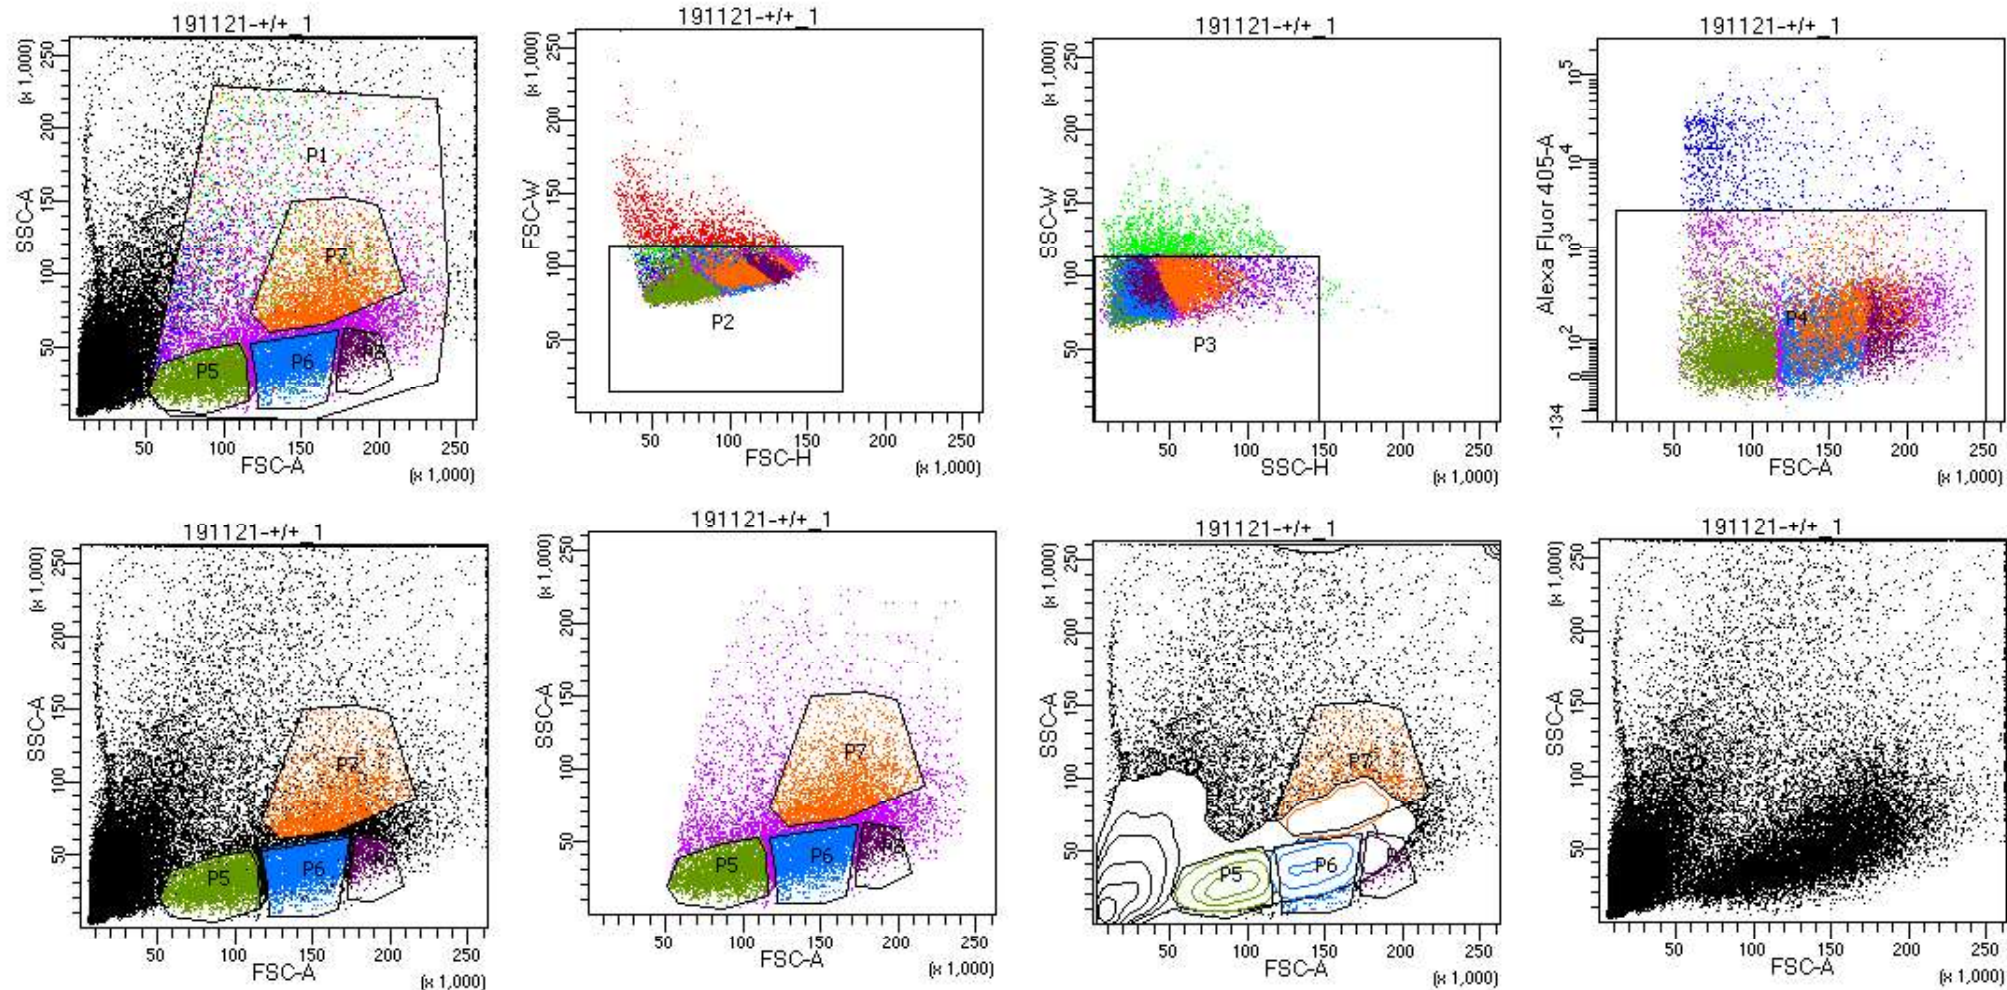

Tube: +/+\_1

| Population | #Events | %Parent | %Total |
|------------|---------|---------|--------|
| All Events | 50,000  | ####    | 100.0  |
| P1         | 17,553  | 35.1    | 35.1   |
| P2         | 16,377  | 93.3    | 32.8   |
| P3         | 15,055  | 91.9    | 30.1   |
| P4         | 14,248  | 94.6    | 28.5   |
| P5         | 4,001   | 28.1    | 8.0    |
| P6         | 3,620   | 25.4    | 7.2    |
| P7         | 2,632   | 18.5    | 5.3    |
| P8         | 646     | 4.5     | 1.3    |



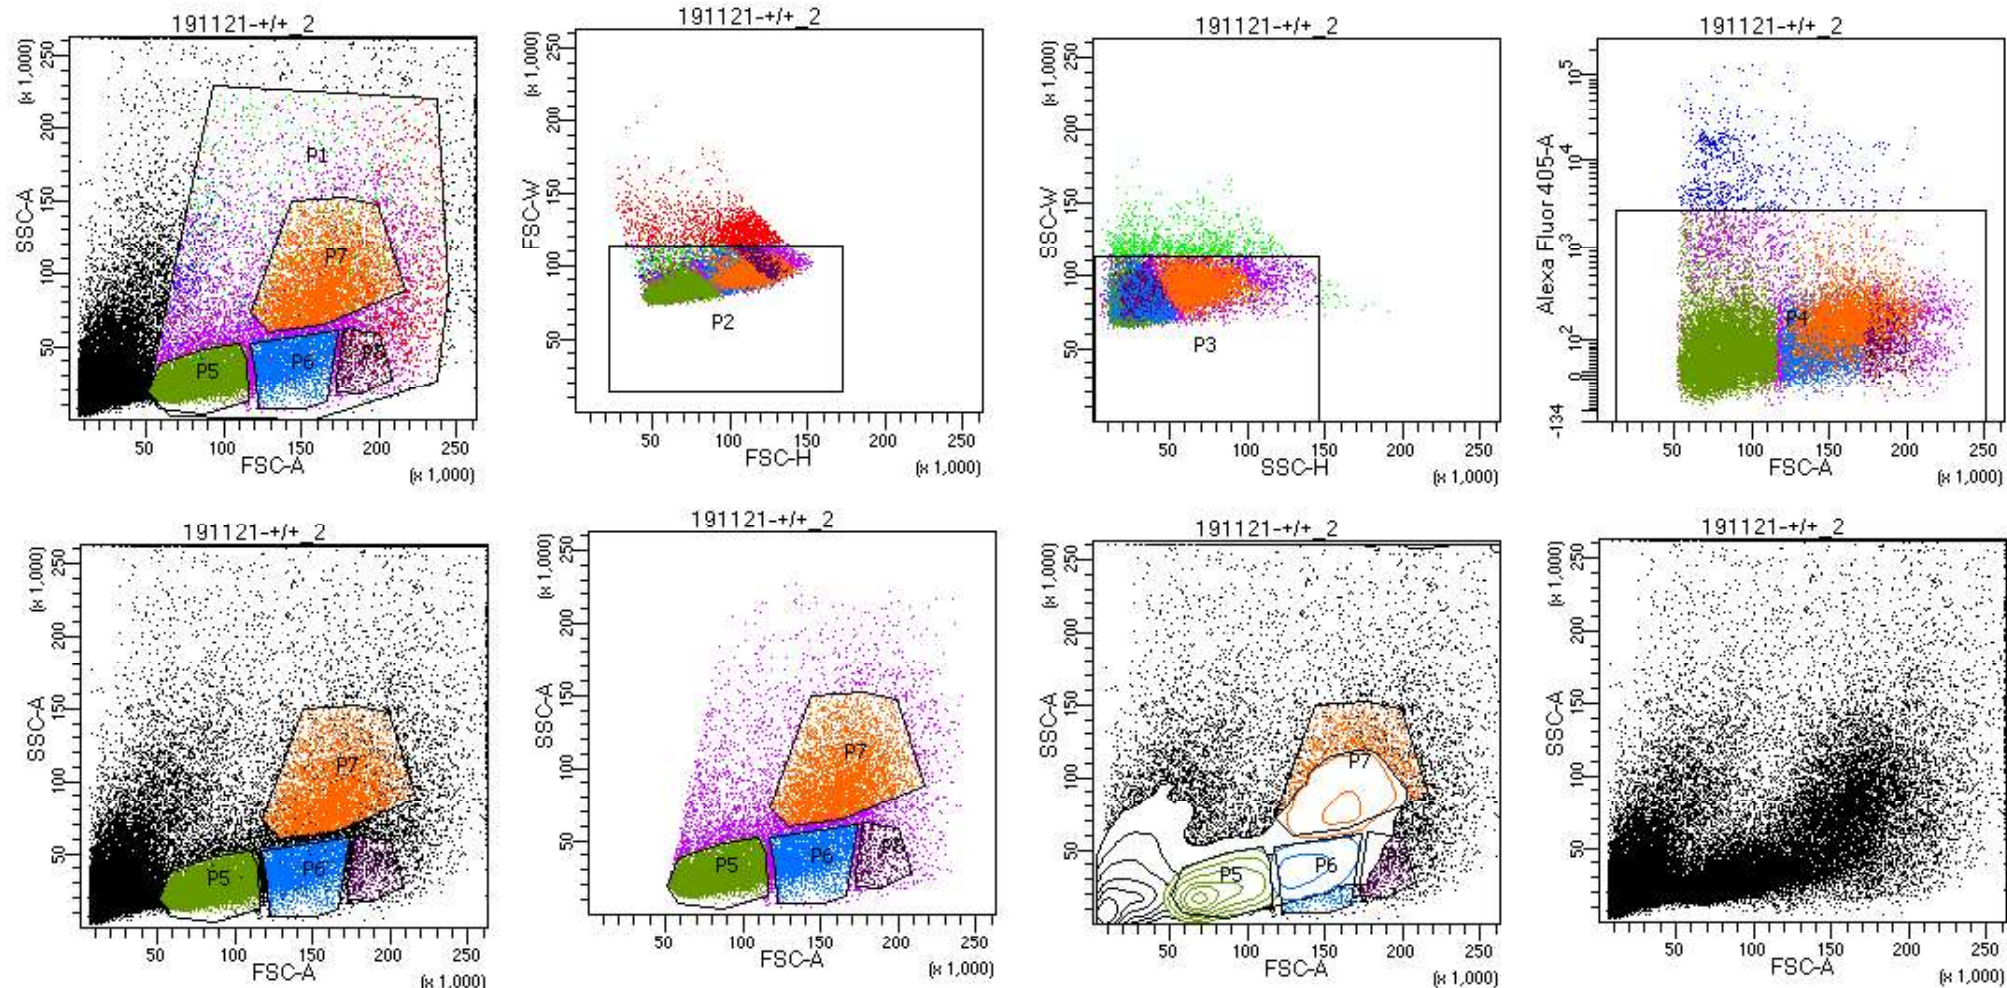

Tube: +/+\_2

| Population | #Events | %Parent | %Total |
|------------|---------|---------|--------|
| All Events | 50,000  | ####    | 100.0  |
| P1         | 26,704  | 53.4    | 53.4   |
| P2         | 24,996  | 93.6    | 50.0   |
| P3         | 24,147  | 96.6    | 48.3   |
| P4         | 23,498  | 97.3    | 47.0   |
| P5         | 12,949  | 55.1    | 25.9   |
| P6         | 2,774   | 11.8    | 5.5    |
| P7         | 4,209   | 17.9    | 8.4    |
| P8         | 387     | 1.6     | 0.8    |



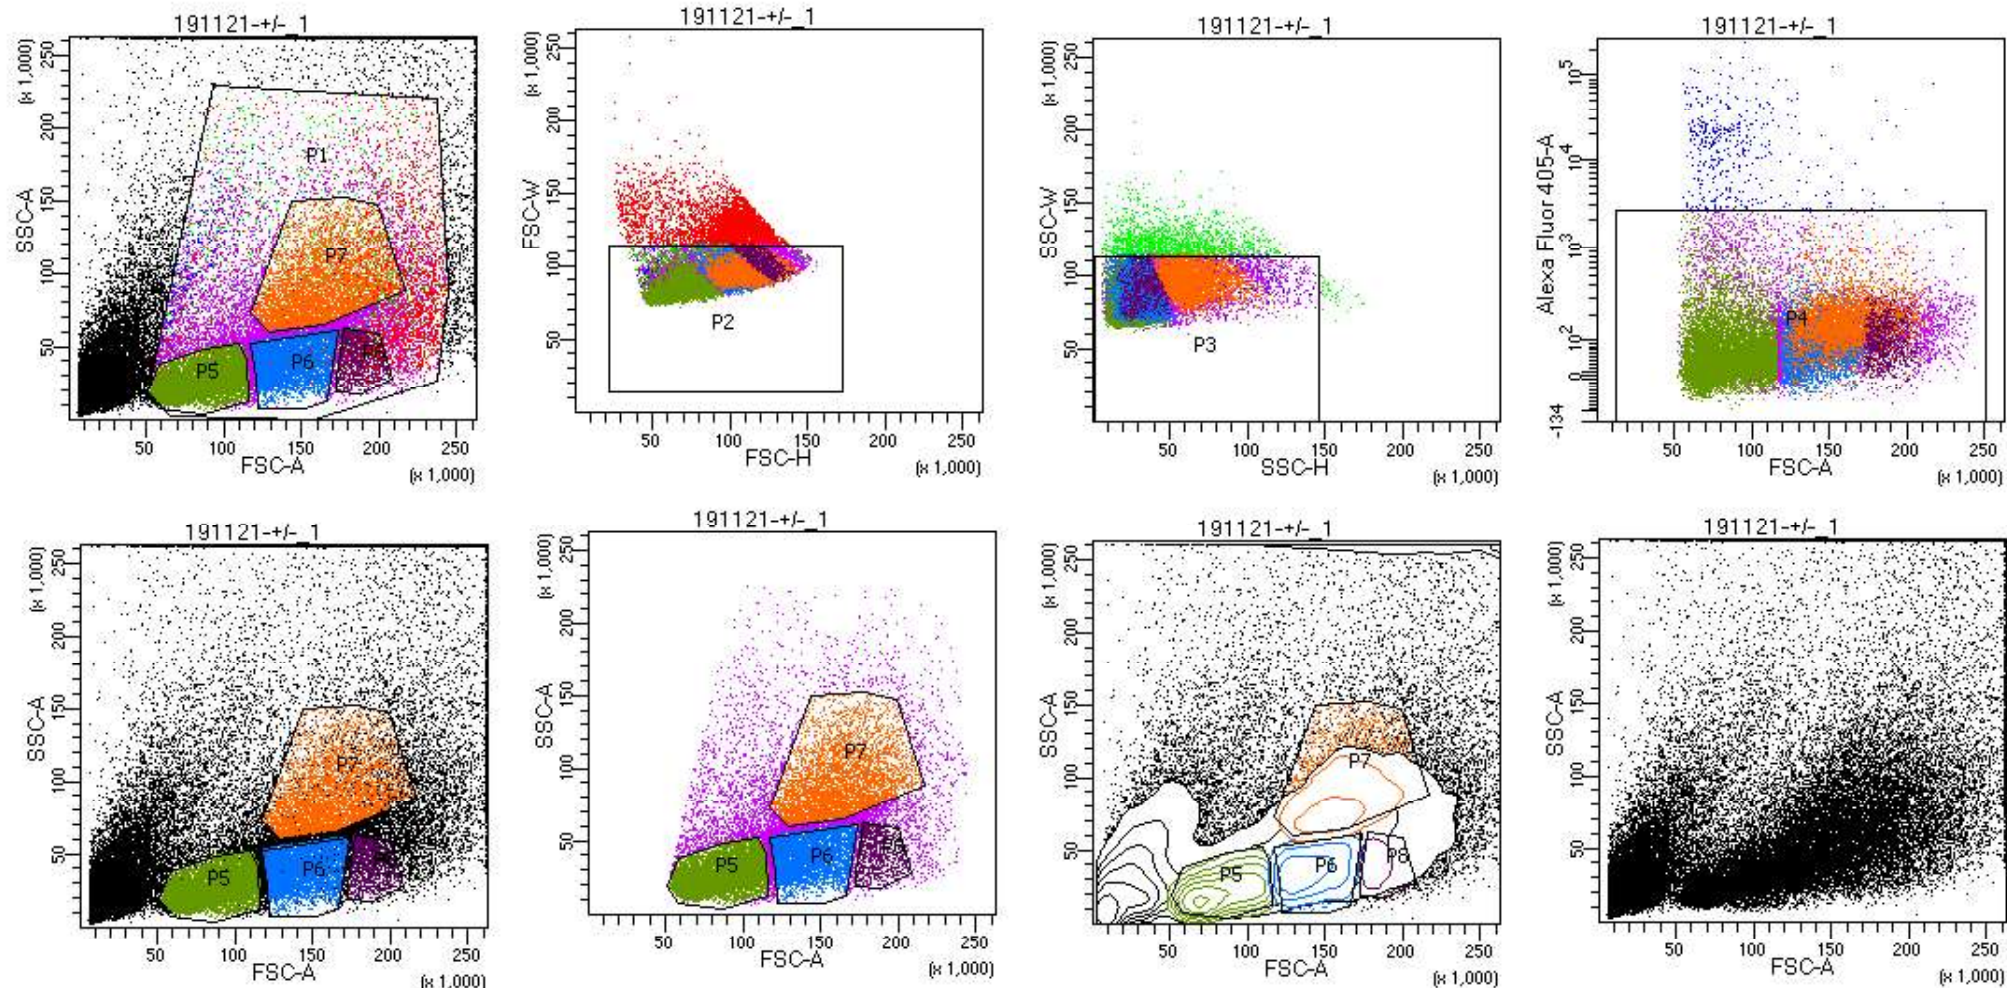

Tube: +/-\_1

| Population | #Events | %Parent | %Total |
|------------|---------|---------|--------|
| All Events | 50,000  | ####    | 100.0  |
| P1         | 29,505  | 59.0    | 59.0   |
| P2         | 25,226  | 85.5    | 50.5   |
| P3         | 23,780  | 94.3    | 47.6   |
| P4         | 23,364  | 98.3    | 46.7   |
| P5         | 10,133  | 43.4    | 20.3   |
| P6         | 4,226   | 18.1    | 8.5    |
| P7         | 4,174   | 17.9    | 8.3    |
| P8         | 795     | 3.4     | 1.6    |



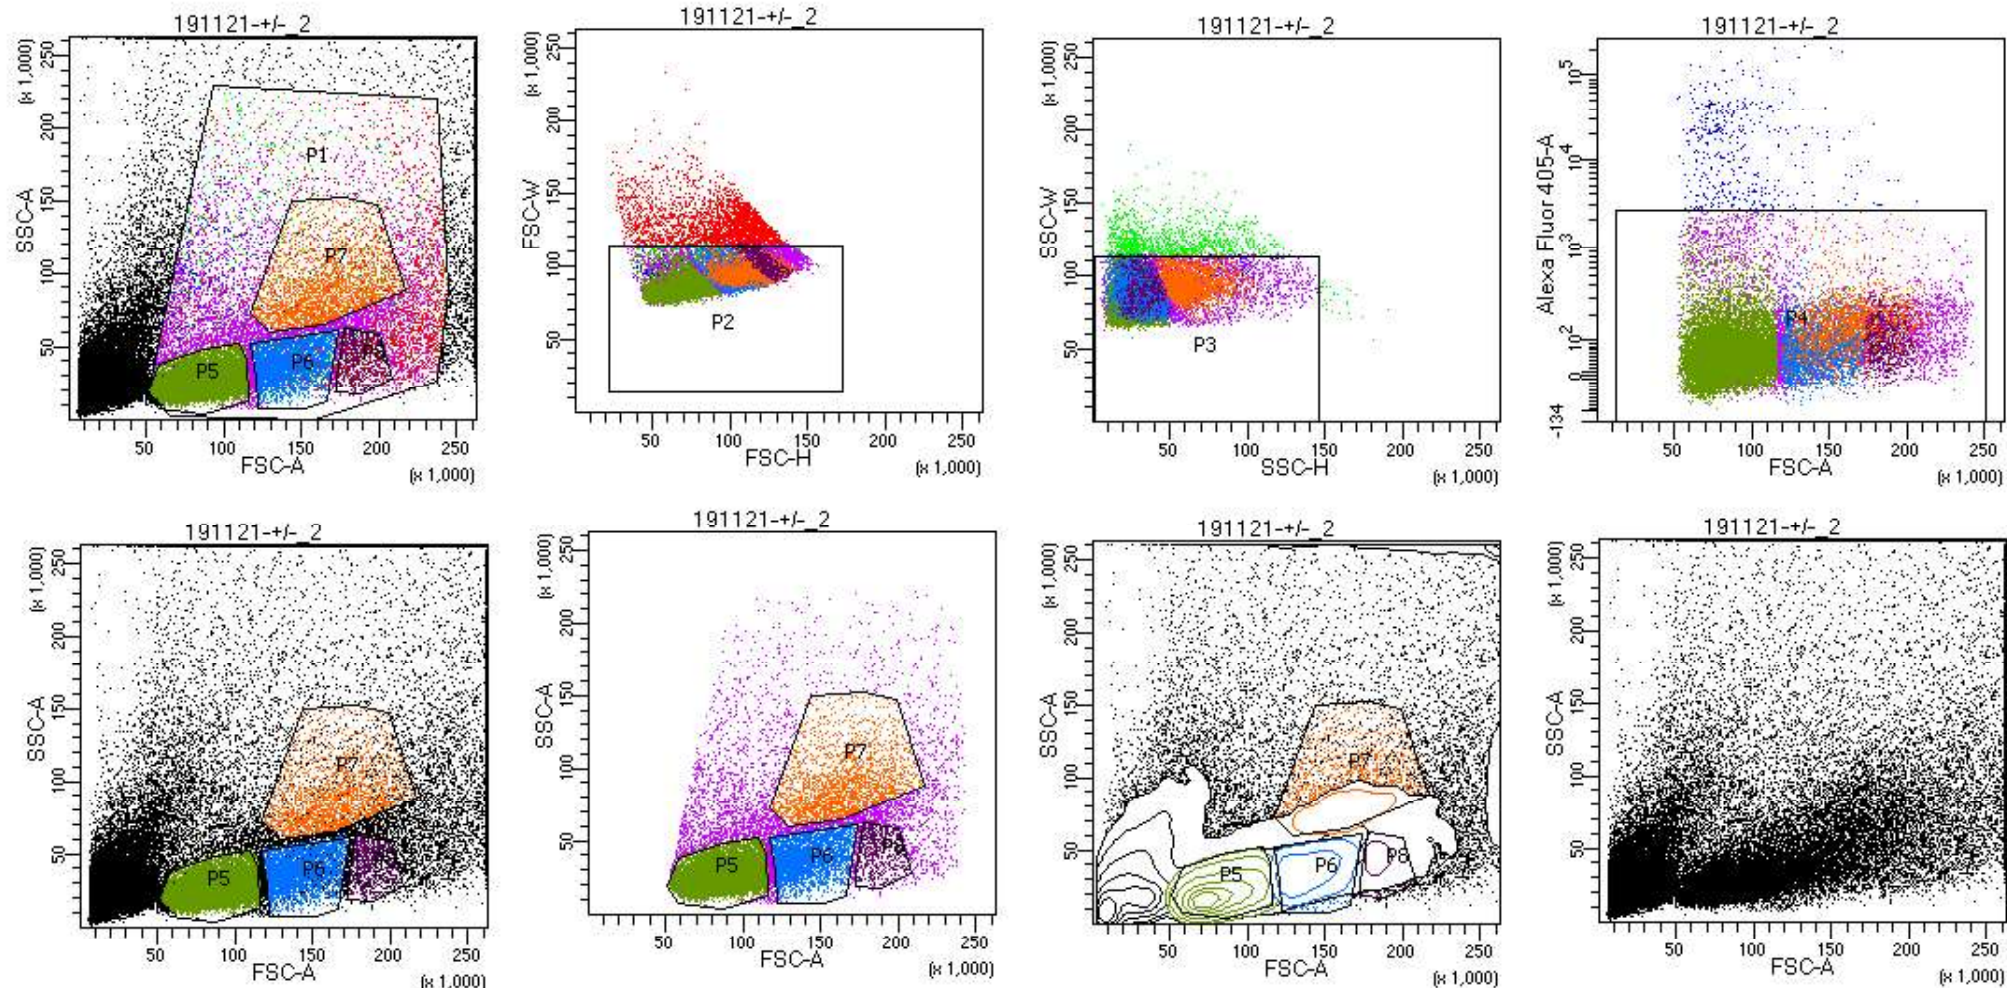

Tube: +/-\_2

| Population | #Events | %Parent | %Total |
|------------|---------|---------|--------|
| All Events | 50,000  | ####    | 100.0  |
| P1         | 25,804  | 51.6    | 51.6   |
| P2         | 23,100  | 89.5    | 46.2   |
| P3         | 22,035  | 95.4    | 44.1   |
| P4         | 21,634  | 98.2    | 43.3   |
| P5         | 13,030  | 60.2    | 26.1   |
| P6         | 2,625   | 12.1    | 5.2    |
| P7         | 1,983   | 9.2     | 4.0    |
| P8         | 554     | 2.6     | 1.1    |



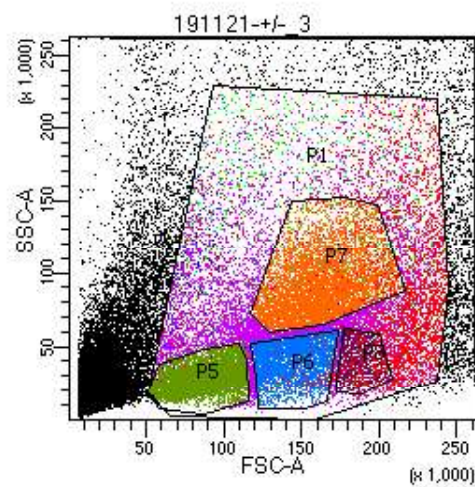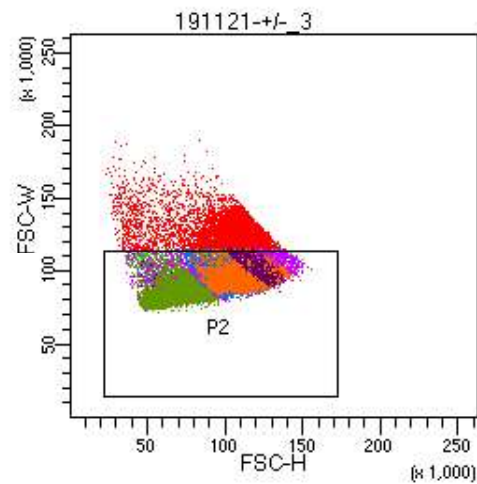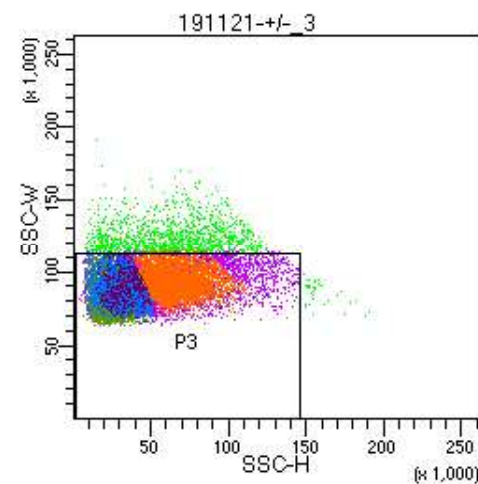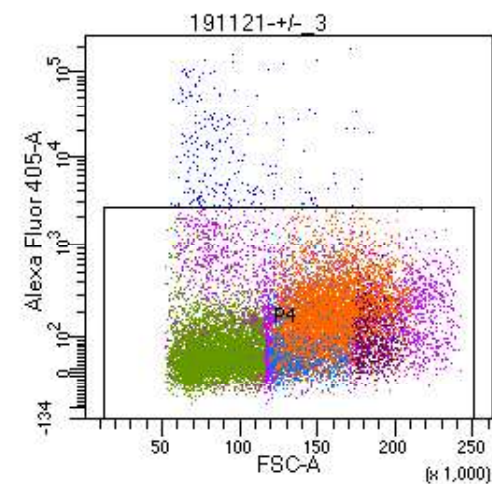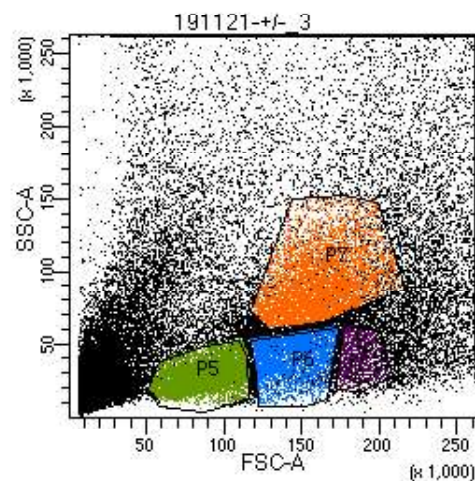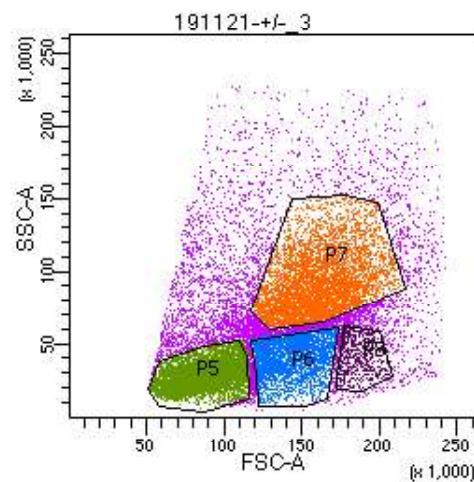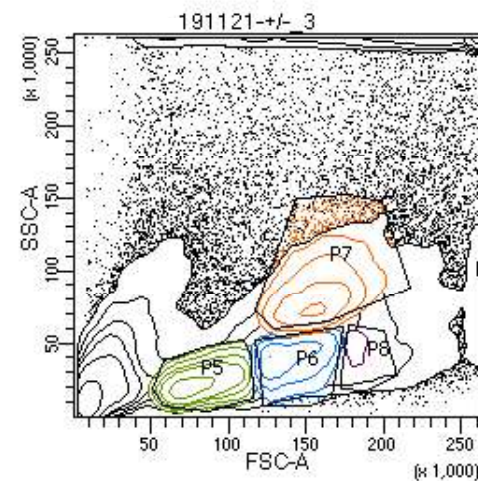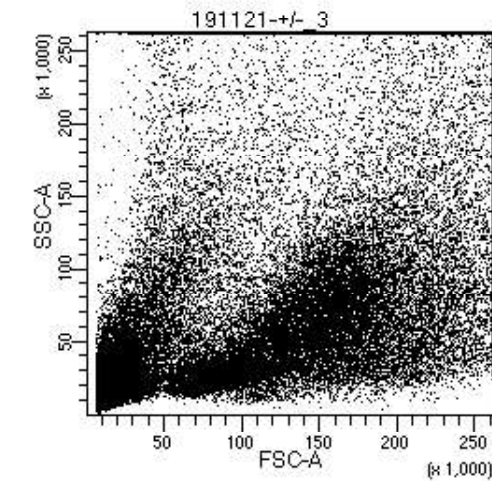

Tube: +/-\_3

| Population | #Events | %Parent | %Total |
|------------|---------|---------|--------|
| All Events | 50,000  | ####    | 100.0  |
| P1         | 25,400  | 50.8    | 50.8   |
| P2         | 19,985  | 78.7    | 40.0   |
| P3         | 18,739  | 93.8    | 37.5   |
| P4         | 18,502  | 98.7    | 37.0   |
| P5         | 5,552   | 30.0    | 11.1   |
| P6         | 2,902   | 15.7    | 5.8    |
| P7         | 5,262   | 28.4    | 10.5   |
| P8         | 543     | 2.9     | 1.1    |



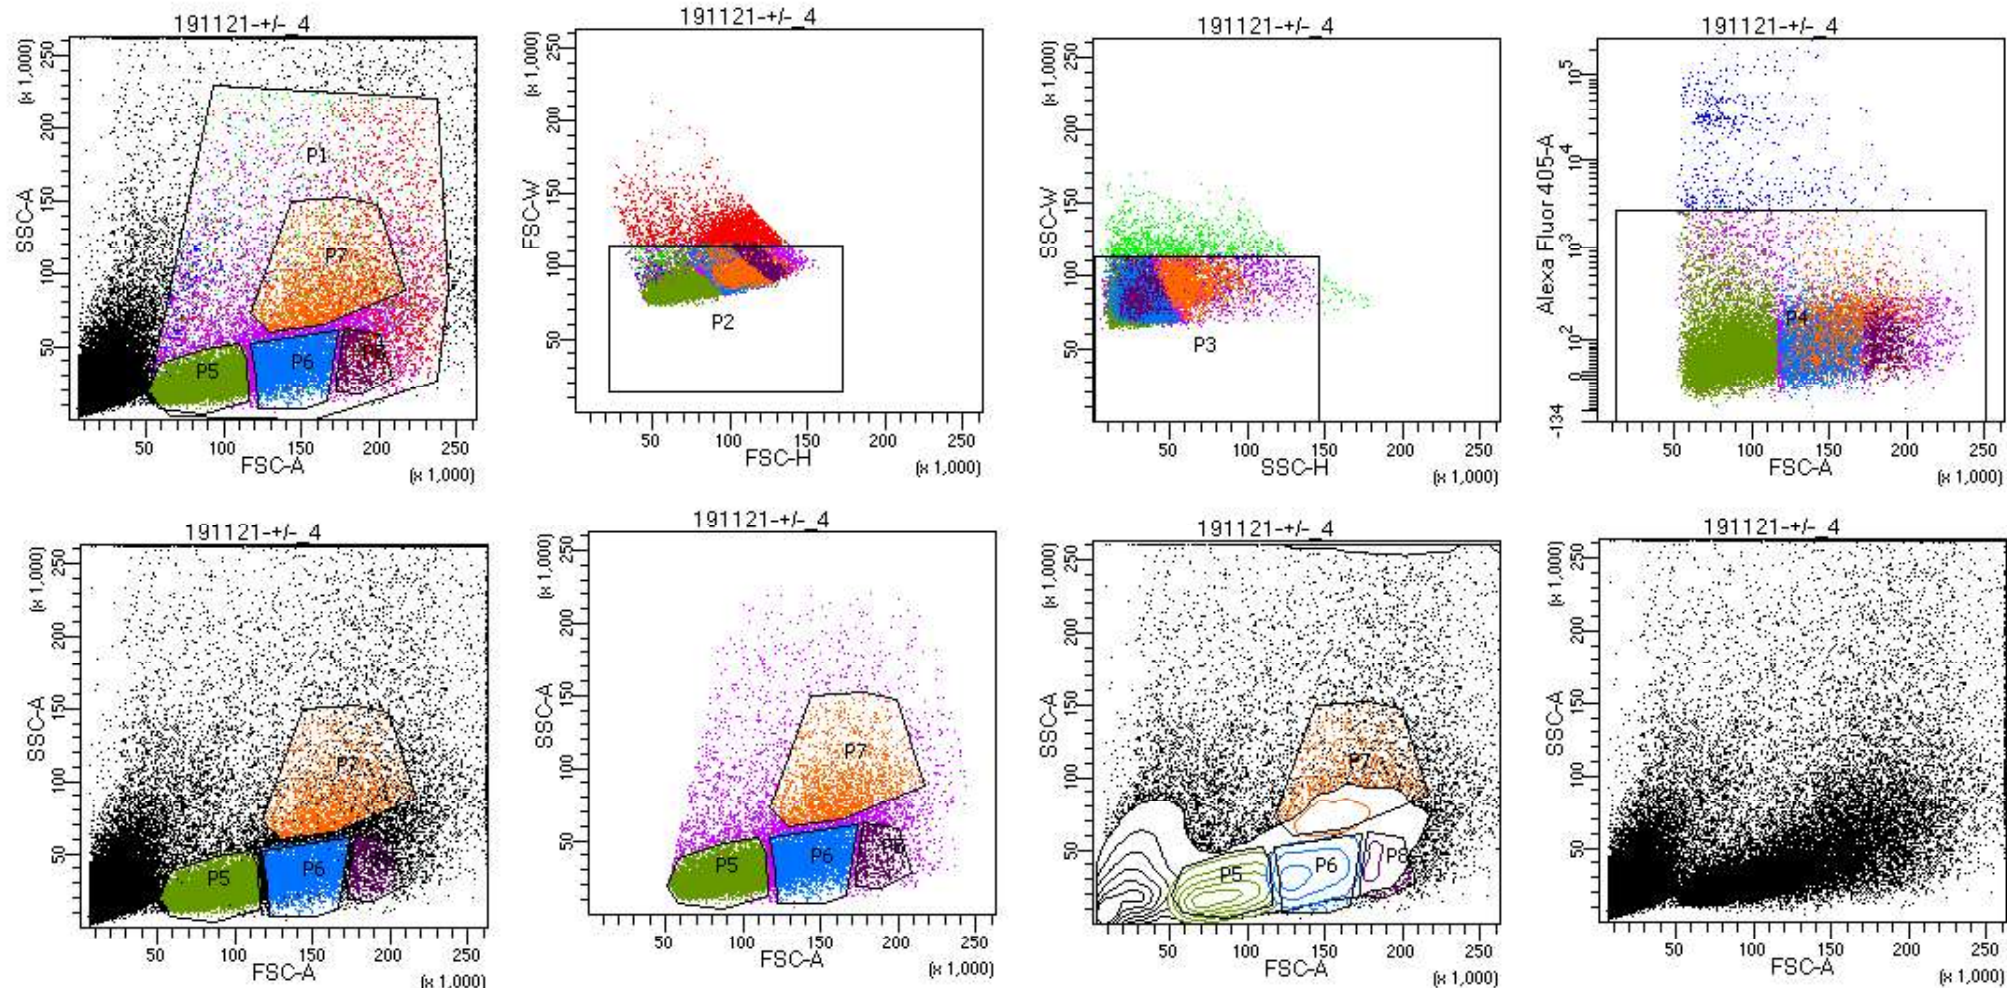

Tube: +/-\_4

| Population | #Events | %Parent | %Total |
|------------|---------|---------|--------|
| All Events | 50,000  | ####    | 100.0  |
| P1         | 26,763  | 53.5    | 53.5   |
| P2         | 23,572  | 88.1    | 47.1   |
| P3         | 22,599  | 95.9    | 45.2   |
| P4         | 22,087  | 97.7    | 44.2   |
| P5         | 11,613  | 52.6    | 23.2   |
| P6         | 4,886   | 22.1    | 9.8    |
| P7         | 1,918   | 8.7     | 3.8    |
| P8         | 628     | 2.8     | 1.3    |



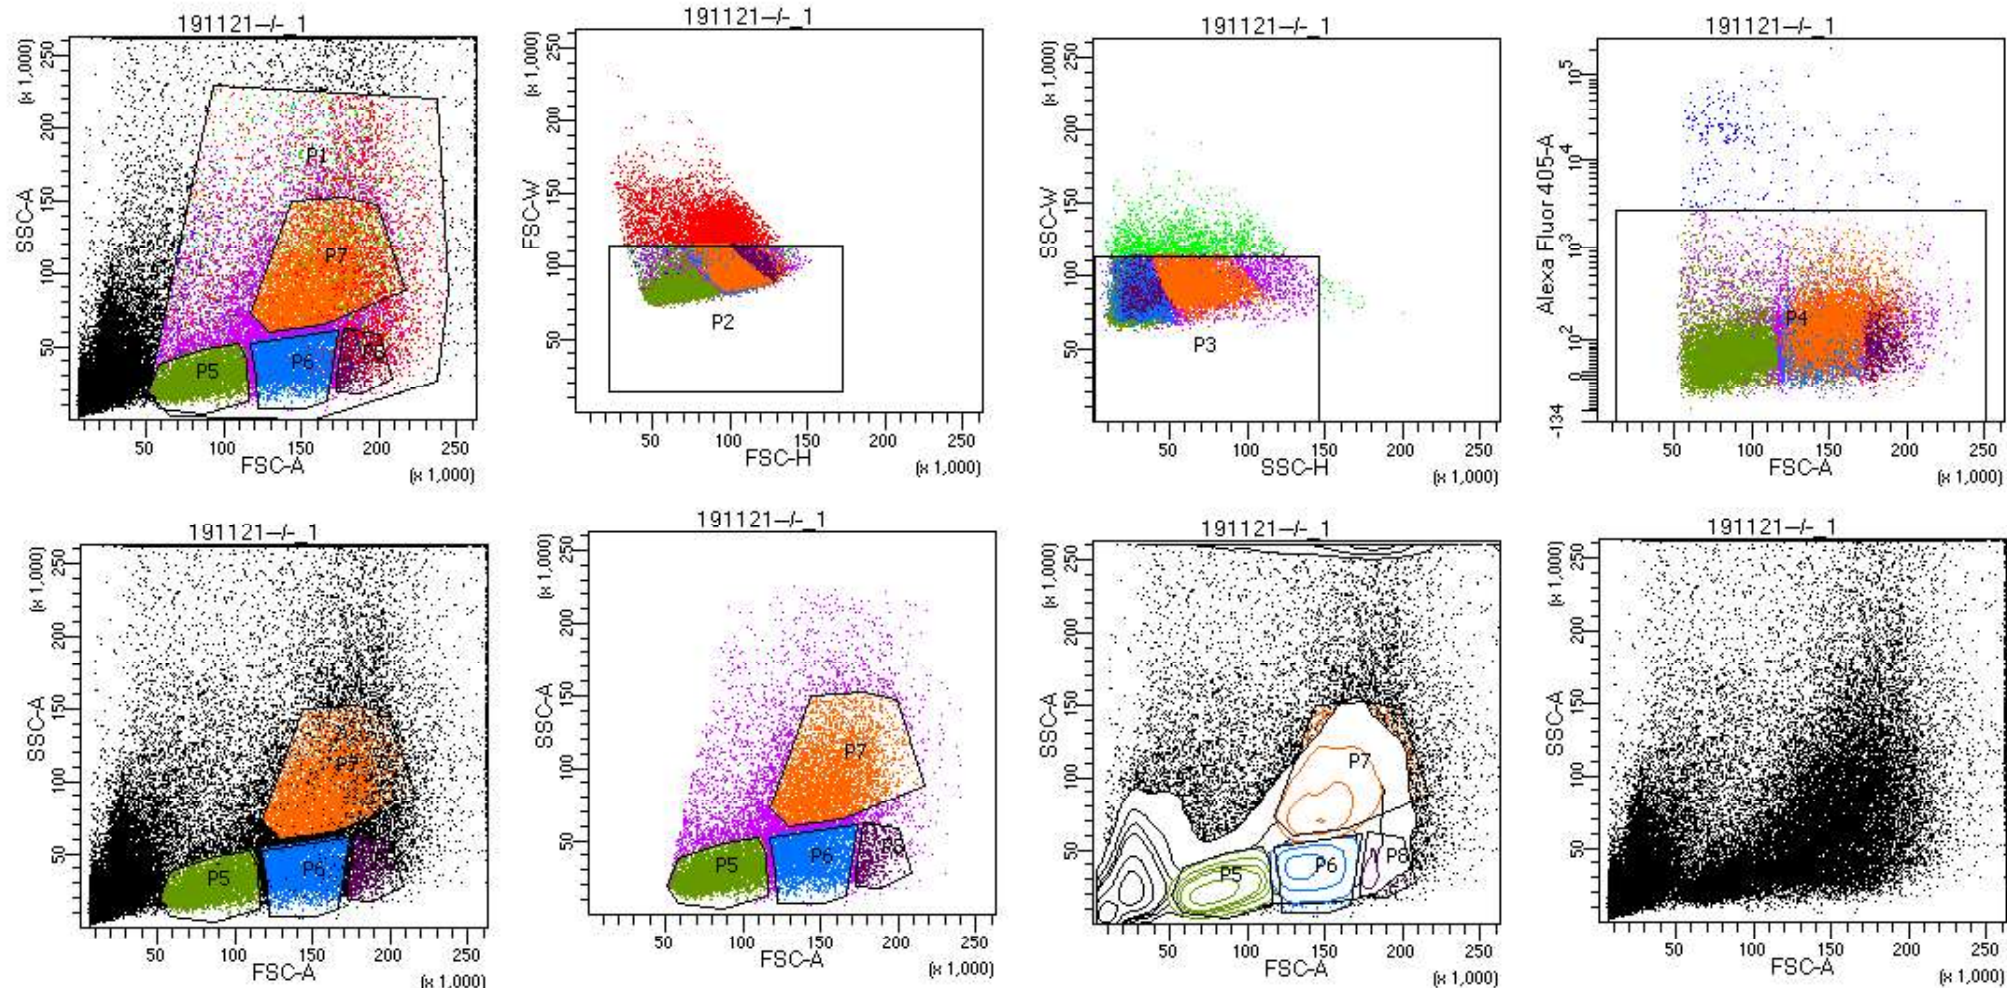

Tube: -/-\_1

| Population | #Events | %Parent | %Total |
|------------|---------|---------|--------|
| All Events | 50,000  | ####    | 100.0  |
| P1         | 28,607  | 57.2    | 57.2   |
| P2         | 21,784  | 76.1    | 43.6   |
| P3         | 20,371  | 93.5    | 40.7   |
| P4         | 20,134  | 98.8    | 40.3   |
| P5         | 7,503   | 37.3    | 15.0   |
| P6         | 3,471   | 17.2    | 6.9    |
| P7         | 4,862   | 24.1    | 9.7    |
| P8         | 555     | 2.8     | 1.1    |



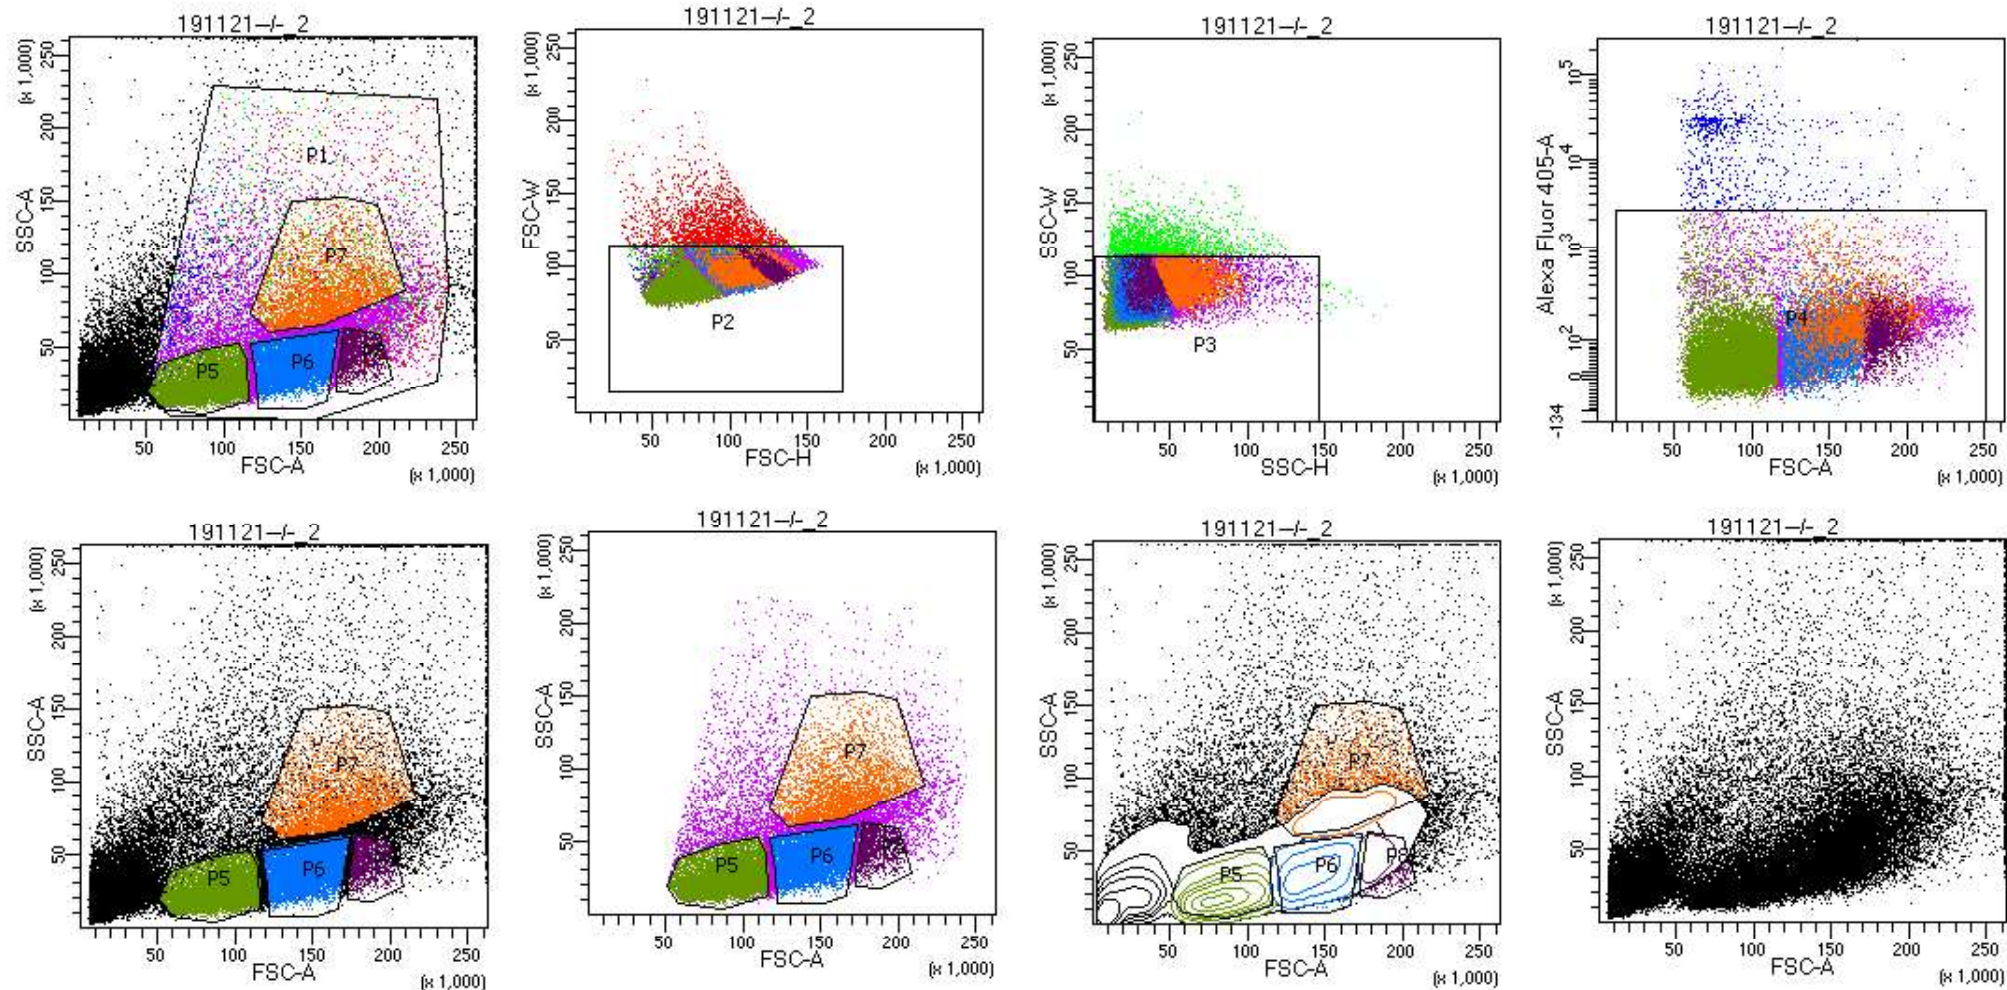

Tube: -/-\_2

| Population   | #Events | %Parent | %Total |
|--------------|---------|---------|--------|
| ■ All Events | 50,000  | ####    | 100.0  |
| ■ P1         | 32,042  | 64.1    | 64.1   |
| ■ P2         | 30,103  | 93.9    | 60.2   |
| ■ P3         | 28,231  | 93.8    | 56.5   |
| ■ P4         | 27,521  | 97.5    | 55.0   |
| ■ P5         | 12,497  | 45.4    | 25.0   |
| ■ P6         | 6,188   | 22.5    | 12.4   |
| ■ P7         | 3,099   | 11.3    | 6.2    |
| ■ P8         | 1,137   | 4.1     | 2.3    |



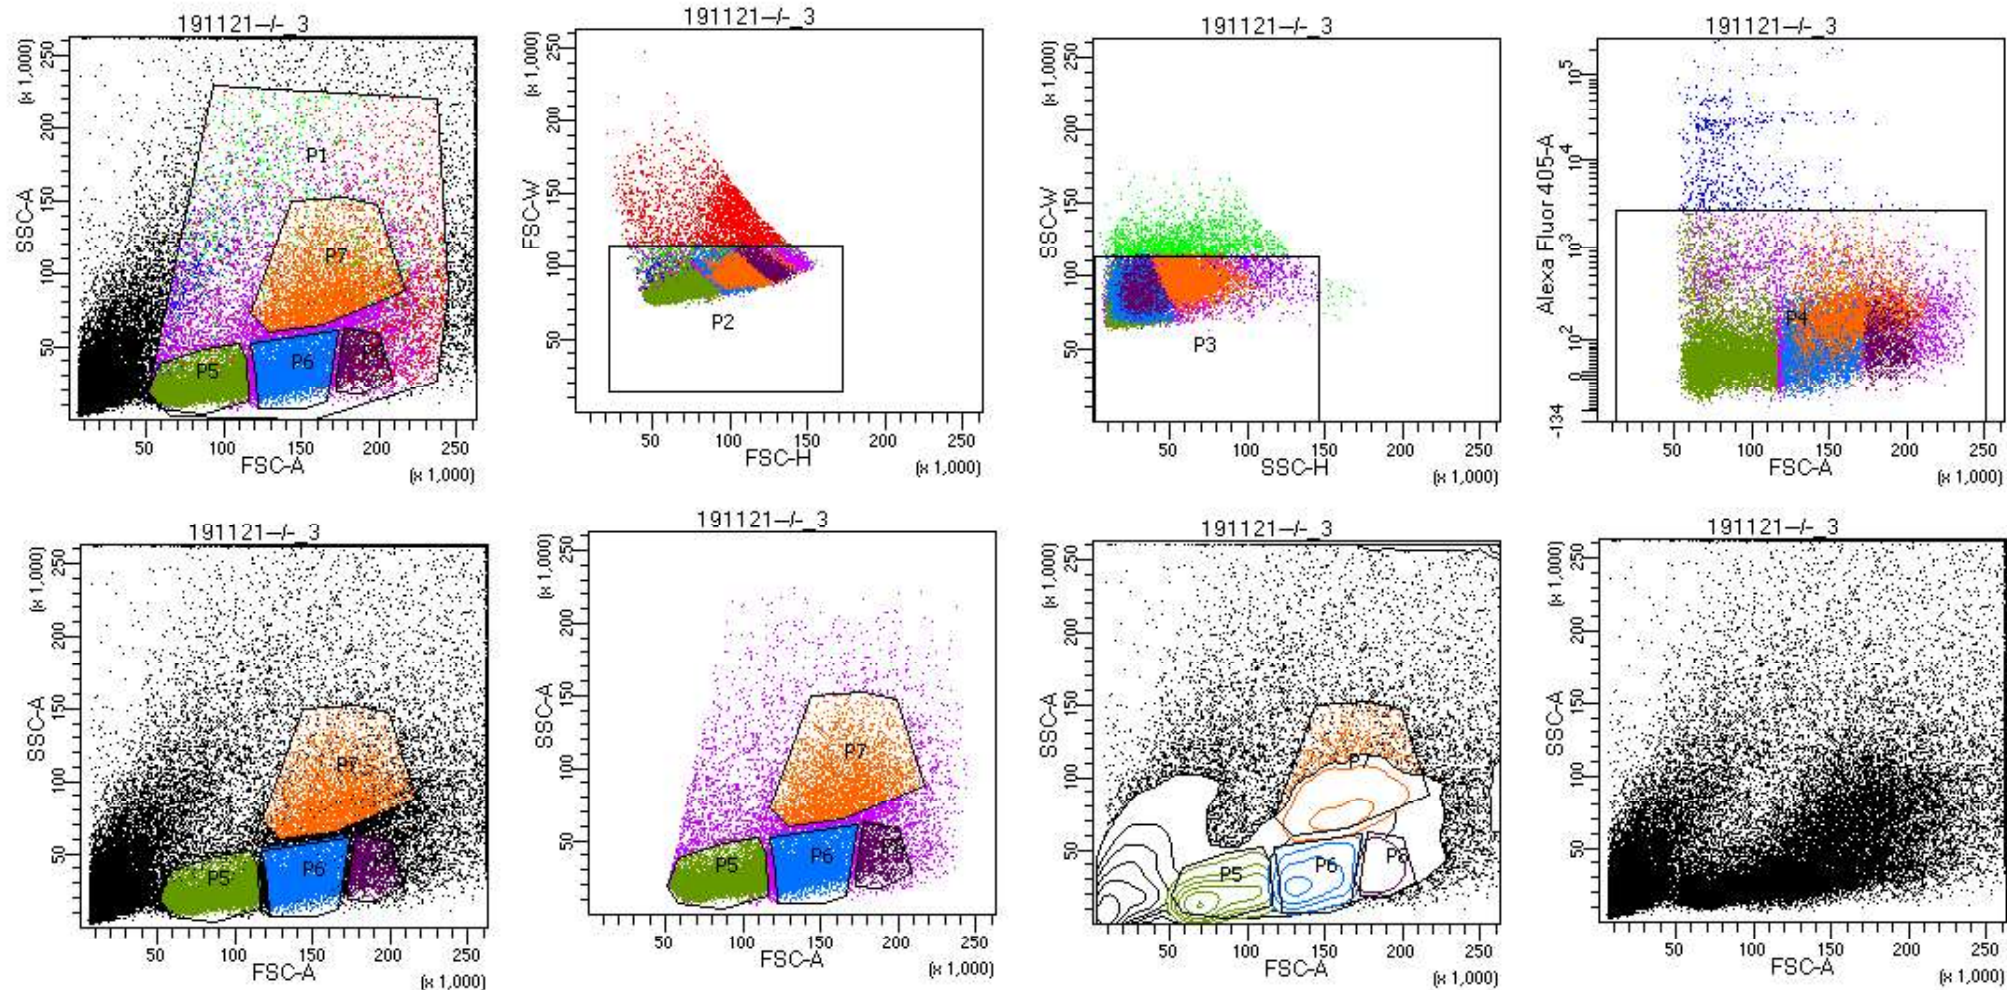

Tube: -/-\_3

| Population | #Events | %Parent | %Total |
|------------|---------|---------|--------|
| All Events | 50,000  | ####    | 100.0  |
| P1         | 27,923  | 55.8    | 55.8   |
| P2         | 25,156  | 90.1    | 50.3   |
| P3         | 23,488  | 93.4    | 47.0   |
| P4         | 22,908  | 97.5    | 45.8   |
| P5         | 8,827   | 38.5    | 17.7   |
| P6         | 5,513   | 24.1    | 11.0   |
| P7         | 3,623   | 15.8    | 7.2    |
| P8         | 975     | 4.3     | 2.0    |



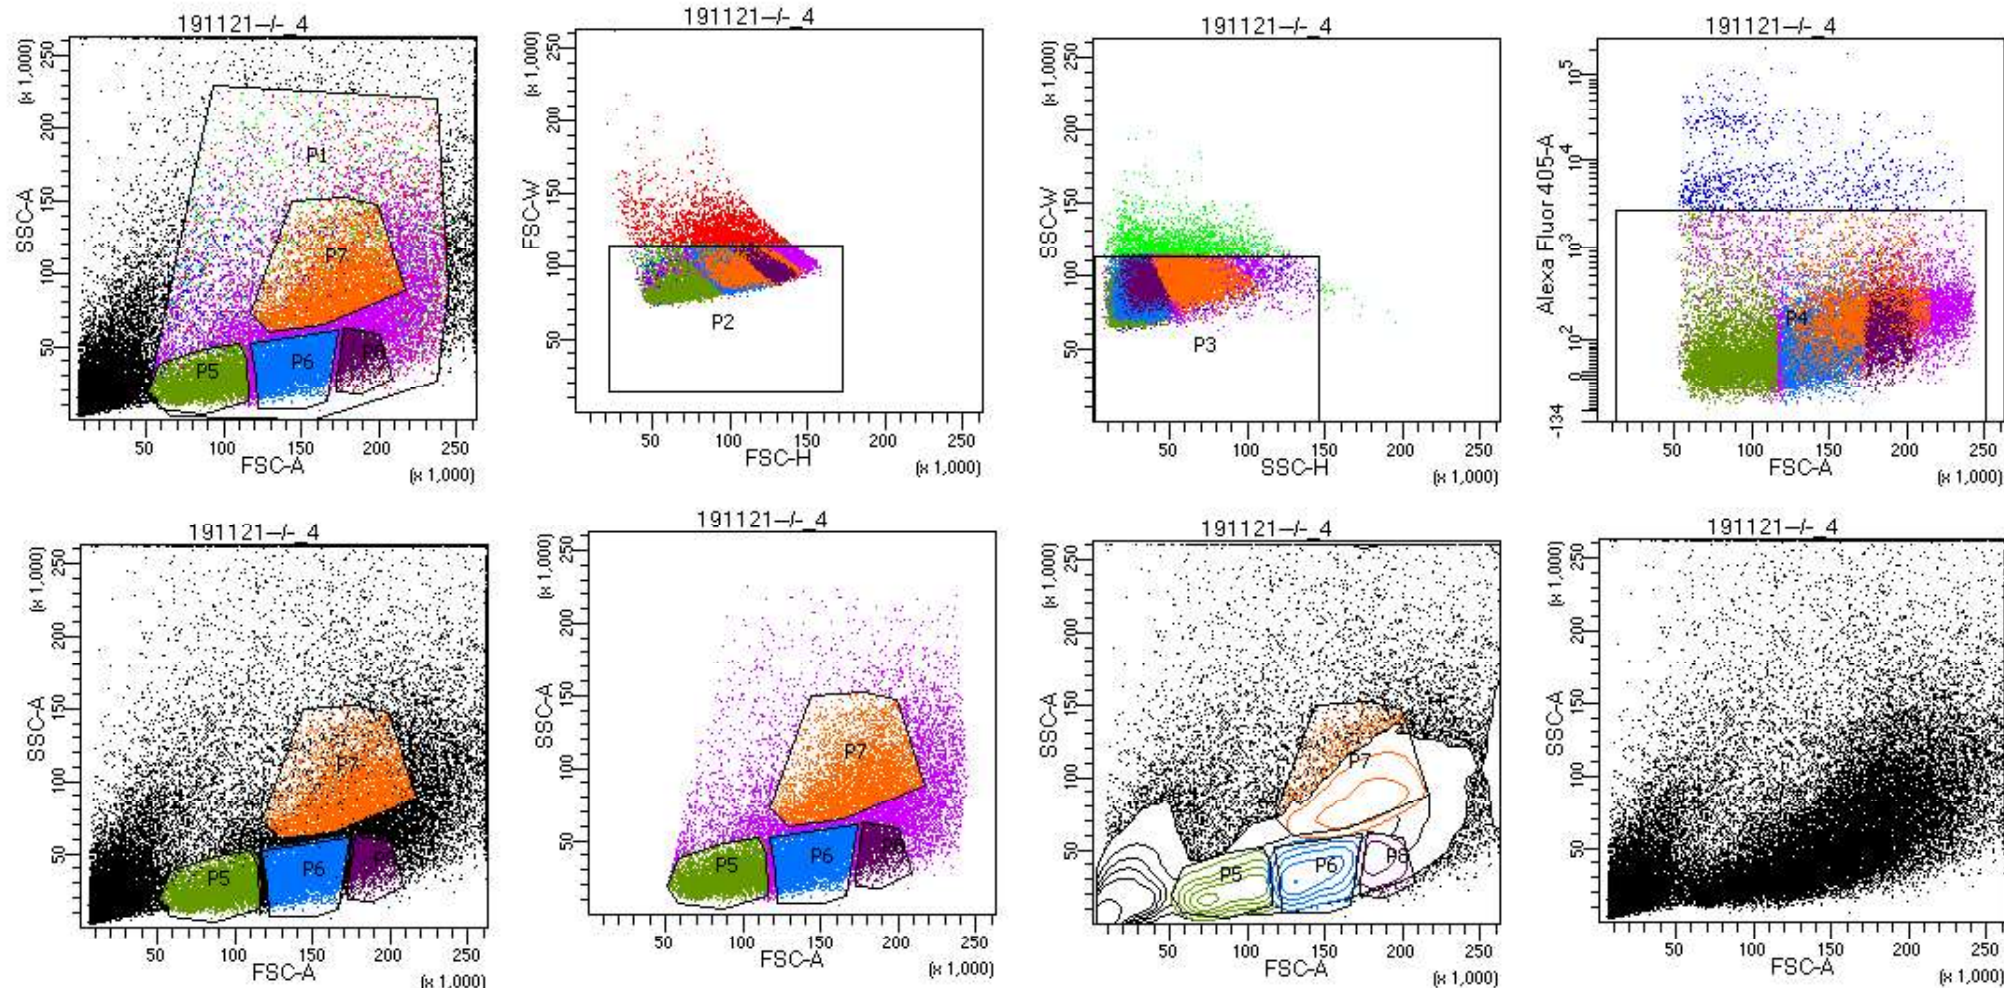

Tube: -/-\_4

| Population   | #Events | %Parent | %Total |
|--------------|---------|---------|--------|
| ■ All Events | 50,000  | ####    | 100.0  |
| ■ P1         | 29,972  | 59.9    | 59.9   |
| ■ P2         | 27,282  | 91.0    | 54.6   |
| ■ P3         | 25,362  | 93.0    | 50.7   |
| ■ P4         | 24,430  | 96.3    | 48.9   |
| ■ P5         | 6,014   | 24.6    | 12.0   |
| ■ P6         | 6,118   | 25.0    | 12.2   |
| ■ P7         | 4,879   | 20.0    | 9.8    |
| ■ P8         | 1,467   | 6.0     | 2.9    |
