# Supplementary material for: Generation of a transparent killifish line through multiplex CRISPR/Cas9mediated gene inactivation
Source: eLife journal article supplement (doi:10.7554/elife.81549), 2023-02-23
Supplement: fig2-figsupp1-data1 [file FACS_WKM_panel_cd.pdf › Figure_2_figure_supplement_1_source_data/Figure_2_figure_supplement_1_panel_CD_source_data/FACS_WKM_panel_cd.pdf]

# BD FACSDiva 8.0.1

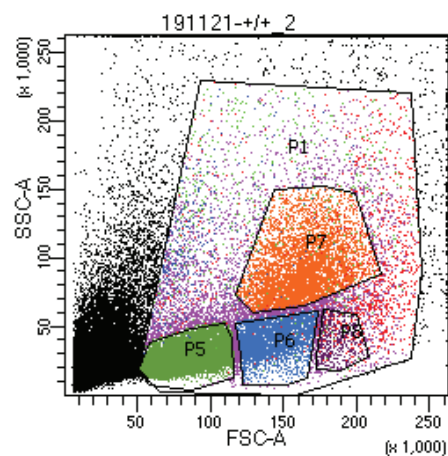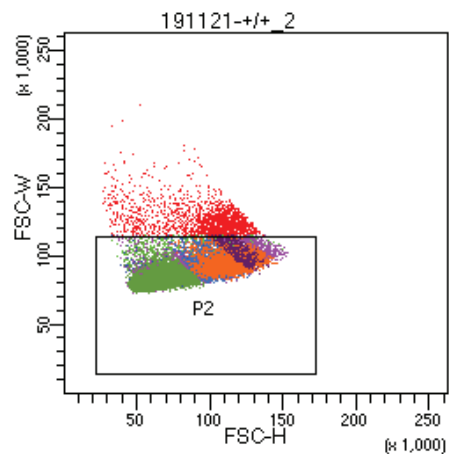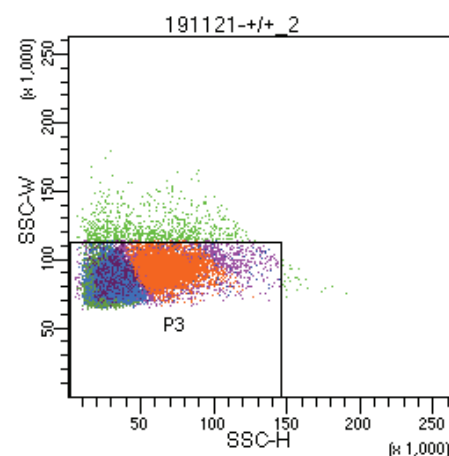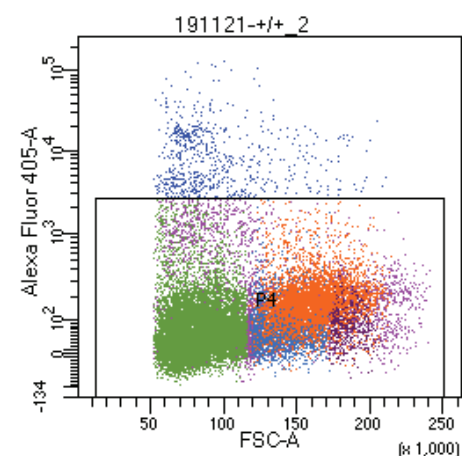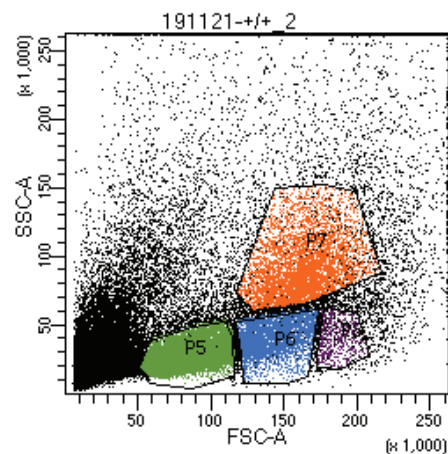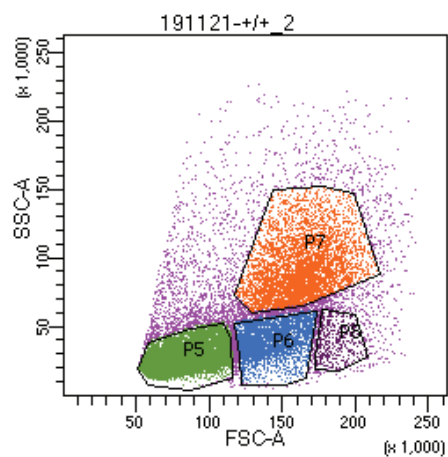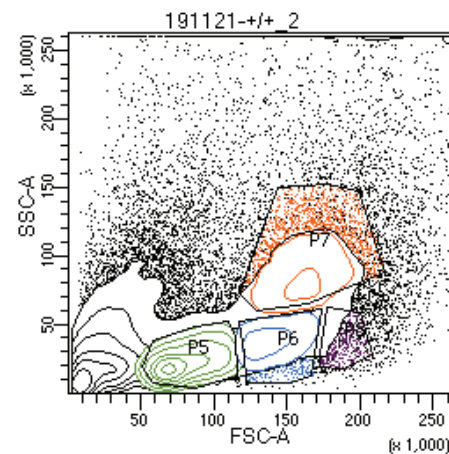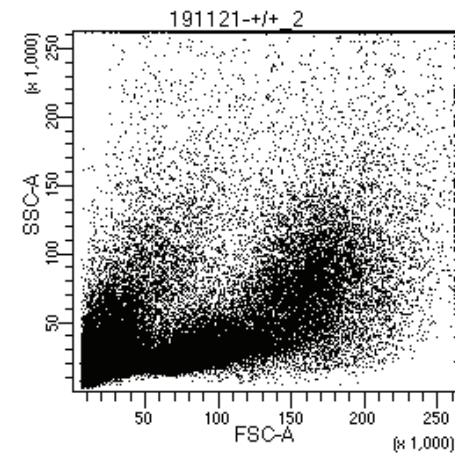

Tube: +/+ 2

| Population | #Events | %Parent | %Total |
|------------|---------|---------|--------|
| All Events | 50,000  | ####    | 100.0  |
| P1         | 26,704  | 53.4    | 53.4   |
| P2         | 24,996  | 93.6    | 50.0   |
| P3         | 24,147  | 96.6    | 48.3   |
| P4         | 23,498  | 97.3    | 47.0   |
| P5         | 12,949  | 55.1    | 25.9   |
| P6         | 2,774   | 11.8    | 5.5    |
| P7         | 4,209   | 17.9    | 8.4    |
| P8         | 387     | 1.6     | 0.8    |

# BD FACSDiva 8.0.1

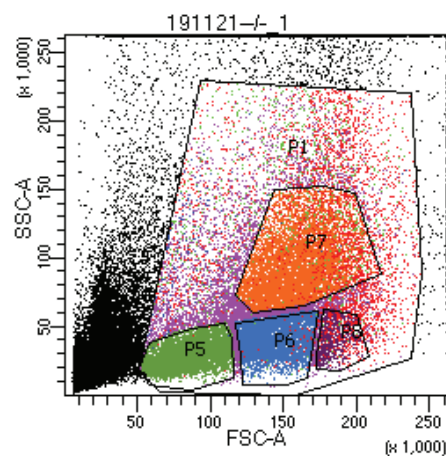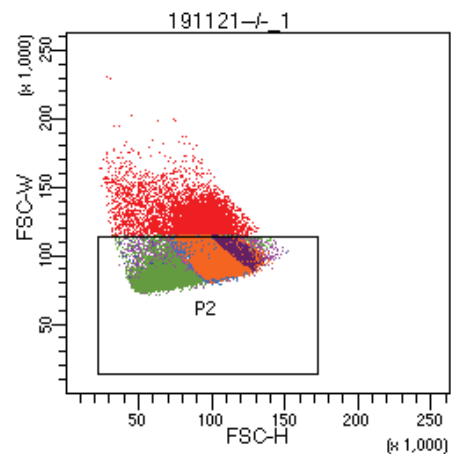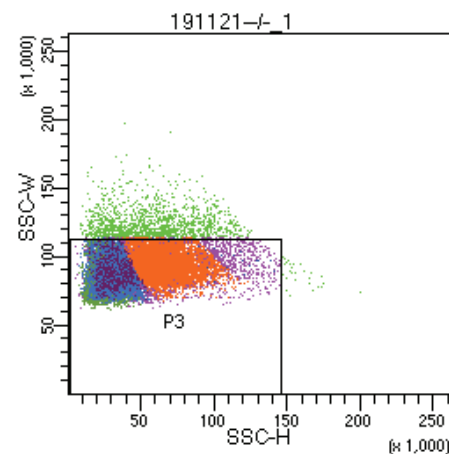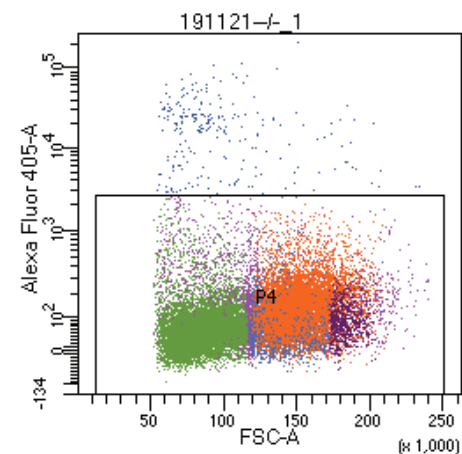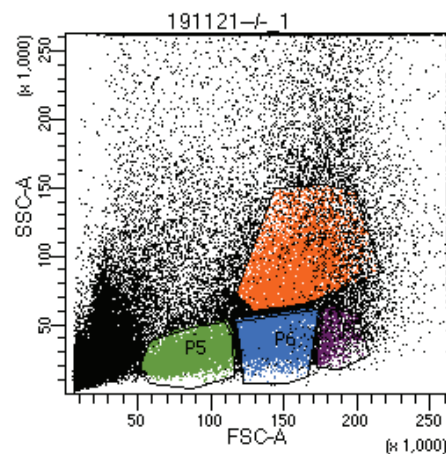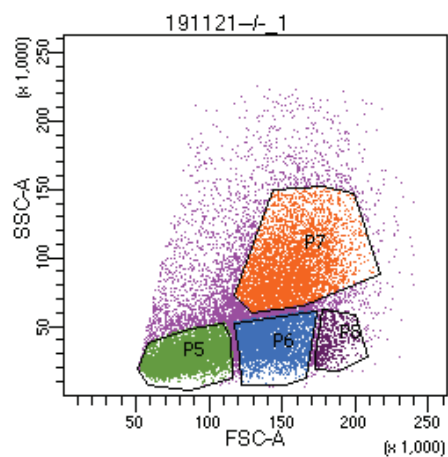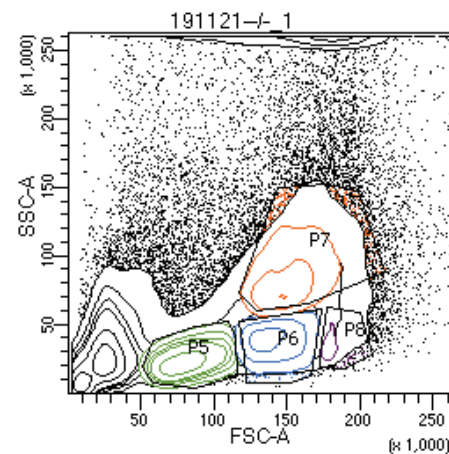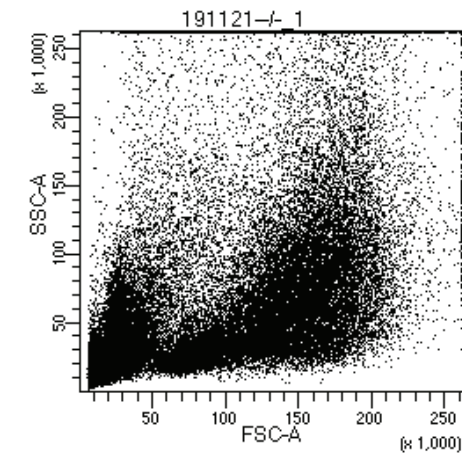

Tube: -/-\_1

| Population | #Events | %Parent | %Total |
|------------|---------|---------|--------|
| All Events | 50,000  | ####    | 100.0  |
| P1         | 28,607  | 57.2    | 57.2   |
| P2         | 21,784  | 76.1    | 43.6   |
| P3         | 20,371  | 93.5    | 40.7   |
| P4         | 20,134  | 98.8    | 40.3   |
| P5         | 7,503   | 37.3    | 15.0   |
| P6         | 3,471   | 17.2    | 6.9    |
| P7         | 4,862   | 24.1    | 9.7    |
| P8         | 555     | 2.8     | 1.1    |
