# Supplementary material for: Generation of a transparent killifish line through multiplex CRISPR/Cas9mediated gene inactivation
Source: eLife journal article supplement (doi:10.7554/elife.81549), 2023-02-23
Supplement: fig2-figsupp1-data1 [file Growth_rate_klara_M08.xlsx]

## Sheet: 7dph
line	age	ID	fish #	sex	size [cm]	weight [mg]		line	age	ID	fish #	sex	size [cm]	weight [mg]
MZCS08-122	7 dph	012024/001	1	female	1	10		klara	7 dph	012022/001	1	female	0.9	8		F-Test Two-Sample for Variances				F-Test Two-Sample for Variances
			2	male	1.1	14					2	female	1	12		Size_M08_vs_klara_ALL				Weight_M08_vs_klara_ALL
			3	male	0.95	11					3	female	1	10			Variable 1	Variable 2			Variable 1	Variable 2
			4	male	1	11					4	male	1	11		Mean	0.95	0.953125		Mean	9.6	8.625
			5	female	0.95	11					5	female	1	10		Variance	0.00785714	0.00315625		Variance	6.25714	4.38333
			6	male	1	10					6	female	0.95	9		Observations	15	16		Observations	15	16
			7	male	1	12					7	male	1	7		df	14	15		df	14	15
			8	female	1	10					8	male	0.9	7		F	2.48939			F	1.42749
			9	male	1	10					9	male	1	11		P(F<=f) one-tail	0.0452724			P(F<=f) one-tail	0.250986
			10	female	0.8	7					10	male	0.9	9		F Critical one-tail	2.42436			F Critical one-tail	2.42436
			11	female	0.9	6					11	male	1.05	11		UNEQUAL VARIANCE				EQUAL VARIANCE
			12	male	0.95	10					12	male	0.95	9
			13	male	0.8	5					13	female	0.85	6
			14	male	0.8	6					14	female	0.9	6		ttest_ALL
			15	male	1	11					15	female	0.9	6		Size	0.908347	n.s.
											16	female	0.95	6		Weight	0.247691	n.s.
				ALL								ALL
				Mean_M08	0.95	9.6						Mean_klara	0.953125	8.625
				STDEV_M08	0.0886405	2.50143						STDEV_klara	0.0561805	2.09364
REARRANGMENT according to sex
line	age	ID	fish #	sex	size [cm]	weight [mg]		line	age	ID	fish #	sex	size [cm]	weight [mg]
MZCS08-122	7 dph	012024/001	2	male	1.1	14		klara	7 dph	012022/001	4	male	1	11
			3	male	0.95	11					7	male	1	7
			4	male	1	11					8	male	0.9	7
			6	male	1	10					9	male	1	11
			7	male	1	12					10	male	0.9	9
			9	male	1	10					11	male	1.05	11
			12	male	0.95	10					12	male	0.95	9
			13	male	0.8	5					1	female	0.9	8
			14	male	0.8	6					2	female	1	12
			15	male	1	11					3	female	1	10
			1	female	1	10					5	female	1	10
			5	female	0.95	11					6	female	0.95	9
			8	female	1	10					13	female	0.85	6
			10	female	0.8	7					14	female	0.9	6
			11	female	0.9	6					15	female	0.9	6
											16	female	0.95	6
				MALE								MALE
				Mean_M08	0.96	10						Mean_klara	0.971429	9.28571
				STDEV_M08	0.0936898	2.66667						STDEV_klara	0.0566947	1.79947
				FEMALE								FEMALE
				Mean_M08	0.93	8.8						Mean_klara	0.938889	8.11111
				STDEV_M08	0.083666	2.16795						STDEV_klara	0.0546453	2.26078
F-Test Two-Sample for Variances				F-Test Two-Sample for Variances				F-Test Two-Sample for Variances				F-Test Two-Sample for Variances
Size_M08_vs_klara_MALE				Size_M08_vs_klara_FEMALE				Weight_M08_vs_klara_MALE				Weight_M08_vs_klara_FEMALE
	Variable 1	Variable 2			Variable 1	Variable 2			Variable 1	Variable 2			Variable 1	Variable 2
Mean	0.96	0.971429		Mean	0.93	0.938889		Mean	10	9.28571		Mean	8.8	8.11111
Variance	0.00877778	0.00321429		Variance	0.007	0.00298611		Variance	7.11111	3.2381		Variance	4.7	5.11111
Observations	10	7		Observations	5	9		Observations	10	7		Observations	5	9
df	9	6		df	4	8		df	9	6		df	4	8
F	2.73086			F	2.34419			F	2.19608			F	0.919565
P(F<=f) one-tail	0.117065			P(F<=f) one-tail	0.141893			P(F<=f) one-tail	0.175269			P(F<=f) one-tail	0.502343
F Critical one-tail	4.09902			F Critical one-tail	3.83785			F Critical one-tail	4.09902			F Critical one-tail	0.165534
EQUAL VARIANCE				EQUAL VARIANCE				EQUAL VARIANCE				EQUAL VARIANCE
ttest_Male				ttest_female
Size	0.778418	n.s.		Size	0.812601	n.s.
Weight	0.548036	n.s.		Weight	0.589901	n.s.

## Sheet: 14dph
line	age	ID	fish #	sex	size [cm]	weight [mg]		line	age	ID	fish #	sex	size [cm]	weight [mg]
MZCS08-122	14 dph	012024/023	1	male	1.7	61		klara	14 dph	012023/031	1	female	1.7	49		F-Test Two-Sample for Variances				F-Test Two-Sample for Variances
		012024/022	2	male	1.8	65				012023/029	2	female	1.8	80		Size_M08_vs_klara_ALL				Weight_M08_vs_klara_ALL
		012024/025	3	male	1.8	80				012023/034	3	male	1.8	68			Variable 1	Variable 2			Variable 1	Variable 2
		012024/029	4	male	2.1	97				012023/033	4	female	1.4	29		Mean	1.78333	1.7375		Mean	67.5	57.9167
		012024/028	5	male	1.9	88				012023/036	5	female	1.95	69		Variance	0.0360606	0.0205114		Variance	396.273	312.992
		012024/024	6	male	1.7	53				012023/035	6	male	1.9	87		Observations	12	12		Observations	12	12
		012024/033	7	male	1.9	78				012023/026	7	male	1.8	70		df	11	11		df	11	11
		012024/032	8	female	1.7	62				012023/025	8	male	1.7	45		F	1.75808			F	1.26608
		012024/026	9	male	2.1	95				012023/039	9	female	1.8	52		P(F<=f) one-tail	0.181717			P(F<=f) one-tail	0.351222
		012024/031	10	female	1.5	38				012023/038	10	male	1.7	62		F Critical one-tail	2.81793			F Critical one-tail	2.81793
		012024/030	11	male	1.6	45				012023/037	11	male	1.7	49		EQUAL VARIANCE				EQUAL VARIANCE
		012024/027	12	female	1.6	48				012023/040	12	male	1.6	35
																ttest_ALL
																Size	0.511375	n.s.
				ALL								ALL				Weight	0.225679	n.s.
				Mean_M08	1.78333	67.5						Mean_klara	1.7375	57.9167
				STDEV_M08	0.189896	19.9066						STDEV_klara	0.143218	17.6916
REARRANGMENT according to sex
line	age	ID	fish #	sex	size [cm]	weight [mg]		line	age	ID	fish #	sex	size [cm]	weight [mg]
MZCS08-122	14 dph	012024/023	1	male	1.7	61		klara	14 dph	012023/034	3	male	1.8	68
		012024/022	2	male	1.8	65				012023/035	6	male	1.9	87
		012024/025	3	male	1.8	80				012023/026	7	male	1.8	70
		012024/029	4	male	2.1	97				012023/025	8	male	1.7	45
		012024/028	5	male	1.9	88				012023/038	10	male	1.7	62
		012024/024	6	male	1.7	53				012023/037	11	male	1.7	49
		012024/033	7	male	1.9	78				012023/040	12	male	1.6	35
		012024/026	9	male	2.1	95				012023/031	1	female	1.7	49
		012024/030	11	male	1.6	45				012023/029	2	female	1.8	80
		012024/031	10	female	1.5	38				012023/033	4	female	1.4	29
		012024/027	12	female	1.6	48				012023/036	5	female	1.95	69
		012024/032	8	female	1.7	62				012023/039	9	female	1.8	52
				MALE								MALE
				Mean_M08	1.84444	73.5556						Mean_klara	1.74286	59.4286
				STDEV_M08	0.174005	18.5345						STDEV_klara	0.09759	17.6338
				FEMALE								FEMALE
				Mean_M08	1.6	63.375						Mean_klara	1.73	55.8
				STDEV_M08	0.1	12.0554						STDEV_klara	0.204939	19.6138
F-Test Two-Sample for Variances				F-Test Two-Sample for Variances				F-Test Two-Sample for Variances				F-Test Two-Sample for Variances
Size_M08_vs_klara_Male				Size_M08_vs_klara_Female				Weight_M08_vs_klara_Male				Weight_M08_vs_klara_Female
	Variable 1	Variable 2			Variable 1	Variable 2			Variable 1	Variable 2			Variable 1	Variable 2
Mean	1.84444	1.74286		Mean	1.6	1.73		Mean	73.5556	59.4286		Mean	49.3333	55.8
Variance	0.0302778	0.00952381		Variance	0.01	0.042		Variance	343.528	310.952		Variance	145.333	384.7
Observations	9	7		Observations	3	5		Observations	9	7		Observations	3	5
df	8	6		df	2	4		df	8	6		df	2	4
F	3.17917			F	0.238095			F	1.10476			F	0.377784
P(F<=f) one-tail	0.0879953			P(F<=f) one-tail	0.201449			P(F<=f) one-tail	0.464731			P(F<=f) one-tail	0.292518
F Critical one-tail	4.1468			F Critical one-tail	0.0519567			F Critical one-tail	4.1468			F Critical one-tail	0.0519567
EQUAL VARIANCE				EQUAL VARIANCE				EQUAL VARIANCE				EQUAL VARIANCE
ttest_Male				ttest_female
Size	0.189673	n.s.		Size	0.35341	n.s.
Weight	0.144852	n.s.		Weight	0.630177	n.s.

## Sheet: 21dph
line	age	ID	fish #	sex	size [cm]	weight [mg]		line	age	ID	fish #	sex	size [cm]	weight [mg]
MZCS08-122	21 dph	011997/003/001/003	1	male	2.7	276		klara	21 dph	011996/003	1	male	2.95	308		F-Test Two-Sample for Variances				F-Test Two-Sample for Variances
		011997/001/003	2	male	2.6	212				011996/001	2	male	2.4	173		Size_M08_vs_klara_ALL				Weight_M08_vs_klara_ALL
		011997/001/007	3	male	2.9	337				011996/006	3	male	2.2	119			Variable 1	Variable 2			Variable 1	Variable 2
		011997/001/001	4	male	2.95	336				011996/007	4	male	2.5	179		Mean	2.505	2.475		Mean	209.1	190.3
		011997/001/006	5	male	2.7	211				011996/005	5	female	2.5	188		Variance	0.104694	0.0495833		Variance	7257.21	3722.68
		011997/001/002	6	male	2.3	162				011996/008	6	female	2.6	244		Observations	10	10		Observations	10	10
		011997/001/005	7	male	2.3	132				011996/010	7	female	2.5	234		df	9	9		df	9	9
		011997/001/004	8	female	2.3	162				011996/009	8	female	2.6	210		F	2.11148			F	1.94946
		011997/001/009	9	female	1.9	77				011996/012	9	female	2.3	133		P(F<=f) one-tail	0.140408			P(F<=f) one-tail	0.167176
		011997/001/008	10	female	2.4	186				011996/011	10	female	2.2	115		F Critical one-tail	3.17889			F Critical one-tail	3.17889
																EQUAL VARIANCE				EQUAL VARIANCE
																ttest_ALL
																Size	0.811875	n.s.
				ALL								ALL				Weight	0.577478	n.s.
				Mean_M08	2.505	209.1						Mean_klara	2.475	190.3
				STDEV_M08	0.323565	85.1893						STDEV_klara	0.222673	61.0138
				MALE								MALE
				Mean_M08	2.63571	238						Mean_klara	2.5125	194.75
				STDEV_M08	0.259349	80.8971						STDEV_klara	0.317214	80.1764
				FEMALE								FEMALE
				Mean_M08	2.2	141.667						Mean_klara	2.45	187.333
				STDEV_M08	0.264575	57.2742						STDEV_klara	0.164317	53.0798
F-Test Two-Sample for Variances				F-Test Two-Sample for Variances				F-Test Two-Sample for Variances				F-Test Two-Sample for Variances
Size_M08_vs_klara_Male				Size_M08_vs_klara_Female				Weight_M08_vs_klara_Male				Weight_M08_vs_klara_Female
	Variable 1	Variable 2			Variable 1	Variable 2			Variable 1	Variable 2			Variable 1	Variable 2
Mean	2.63571	2.5125		Mean	2.2	2.45		Mean	238	194.75		Mean	141.667	187.333
Variance	0.0672619	0.100625		Variance	0.07	0.027		Variance	6544.33	6428.25		Variance	3280.33	2817.47
Observations	7	4		Observations	3	6		Observations	7	4		Observations	3	6
df	6	3		df	2	5		df	6	3		df	2	5
F	0.668441			F	2.59259			F	1.01806			F	1.16428
P(F<=f) one-tail	0.308088			P(F<=f) one-tail	0.168851			P(F<=f) one-tail	0.538578			P(F<=f) one-tail	0.384483
F Critical one-tail	0.210214			F Critical one-tail	5.78614			F Critical one-tail	8.94065			F Critical one-tail	5.78614
EQUAL VARIANCE				EQUAL VARIANCE				EQUAL VARIANCE				EQUAL VARIANCE
ttest_Male				ttest_female
Size	0.500337	n.s.		Size	0.117646	n.s.
Weight	0.414465	n.s.		Weight	0.273162	n.s.

## Sheet: 28dph
line	age	ID	fish #	sex	size [cm]	weight [mg]	spleen_weight [mg]		line	age	ID	fish #	sex	size [cm]	weight [mg]	spleen_weight [mg]
MZCS08-122	28 dph		1	male	3.7	523			klara	28 dph		1	male	3.55	492			F-Test Two-Sample for Variances				F-Test Two-Sample for Variances
			2	male	3.2	374						2	male	3.7	529			Size_M08_vs_klara_ALL				Weight_M08_vs_klara_ALL
			3	male	3.5	442						3	male	2.95	243				Variable 1	Variable 2			Variable 1	Variable 2
			4	male	3.35	448						6	male	3	242			Mean	3.18	2.98889		Mean	364.6	278.333
			5	male	3.4	410						7	male	2.7	207			Variance	0.0901111	0.152986		Variance	8500.04	18241
			6	female	2.9	328						4	female	3	242			Observations	10	9		Observations	10	9
			7	female	3.1	331						5	female	2.7	205			df	9	8		df	9	8
			8	female	2.8	231						8	female	2.7	191			F	0.589015			F	0.465986
			9	female	2.95	307						9	female	2.6	154			P(F<=f) one-tail	0.223259			P(F<=f) one-tail	0.138273
			10	female	2.9	252												F Critical one-tail	0.309638			F Critical one-tail	0.309638
																		EQUAL VARIANCE				EQUAL VARIANCE
																		ttest_ALL
																		Size	0.245757	n.s.
				ALL									ALL					Weight	0.119081	n.s.
				Mean_M08	3.18	364.6							Mean_klara	2.98889	278.333
				STDEV_M08	0.300185	92.1957							STDEV_klara	0.391134	135.059
				MALE									MALE
				Mean_M08	3.43	439.4							Mean_klara	3.18	342.6
				STDEV_M08	0.185742	55.2521							STDEV_klara	0.425147	154.51
				FEMALE									FEMALE
				Mean_M08	2.93	289.8							Mean_klara	2.75	198
				STDEV_M08	0.109545	45.6585							STDEV_klara	0.173205	36.3776
F-Test Two-Sample for Variances				F-Test Two-Sample for Variances				F-Test Two-Sample for Variances				F-Test Two-Sample for Variances
Size_M08_vs_klara_male				Size_M08_vs_klara_female				Weight_M08_vs_klara_male				Weight_M08_vs_klara_female
	Variable 1	Variable 2			Variable 1	Variable 2			Variable 1	Variable 2			Variable 1	Variable 2
Mean	3.43	3.18		Mean	2.93	2.75		Mean	439.4	342.6		Mean	289.8	198
Variance	0.0345	0.18075		Variance	0.012	0.03		Variance	3052.8	23873.3		Variance	2084.7	1323.33
Observations	5	5		Observations	5	4		Observations	5	5		Observations	5	4
df	4	4		df	4	3		df	4	4		df	4	3
F	0.190871			F	0.4			F	0.127875			F	1.57534
P(F<=f) one-tail	0.0688329			P(F<=f) one-tail	0.198534			P(F<=f) one-tail	0.0356482			P(F<=f) one-tail	0.369314
F Critical one-tail	0.156538			F Critical one-tail	0.151713			F Critical one-tail	0.156538			F Critical one-tail	9.11718
EQUAL VARIANCE				EQUAL VARIANCE				UNEQUAL VARIANCE				EQUAL VARIANCE
ttest_Male				ttest_female
Size	0.26267	n.s.		Size	0.0976044	n.s.
Weight	0.244247	n.s.		Weight	0.0137984	*

## Sheet: 35dph
line	age	ID	fish #	sex	size [cm]	weight [mg]	spleen_weight [mg]		line	age	ID	fish #	sex	size [cm]	weight [mg]	spleen_weight [mg]
MZCS08-122	35 dph		1	male	4.1	978			klara	35 dph		1	male	4.1	703			F-Test Two-Sample for Variances				F-Test Two-Sample for Variances
			2	male	3.7	565						2	male	4.1	756			Size_M08_vs_klara_ALL				Weight_M08_vs_klara_ALL
			3	male	4	743						3	male	3.7	504				Variable 1	Variable 2			Variable 1	Variable 2
			4	male	3.95	783						4	male	3.7	557			Mean	3.615	3.48		Mean	563.9	461.9
			5	male	3.2	315						5	male	3.1	258			Variance	0.12225	0.164		Variance	47834.3	28045.2
			6	female	3.7	557						6	female	3.3	341			Observations	10	10		Observations	10	10
			7	female	3.7	593						7	female	3.1	353			df	9	9		df	9	9
			8	female	3.4	393						8	female	3.5	463			F	0.745427			F	1.70561
			9	female	3.3	371						9	female	3.1	333			P(F<=f) one-tail	0.334361			P(F<=f) one-tail	0.219297
			10	female	3.1	341						10	female	3.1	351			F Critical one-tail	0.314575			F Critical one-tail	3.17889
																		EQUAL VARIANCE				EQUAL VARIANCE
																		ttest_ALL
																		Size	0.435316	n.s.
				ALL									ALL					Weight	0.256888	n.s.
				Mean_M08	3.615	563.9							Mean_klara	3.48	461.9
				STDEV_M08	0.349643	218.711							STDEV_klara	0.404969	167.467
				MALE									MALE
				Mean_M08	3.79	676.8							Mean_klara	3.74	555.6
				STDEV_M08	0.361248	249.89							STDEV_klara	0.409878	195.651
				FEMALE									FEMALE
				Mean_M08	3.44	451							Mean_klara	3.22	368.2
				STDEV_M08	0.260768	115.395							STDEV_klara	0.178885	53.6022
F-Test Two-Sample for Variances				F-Test Two-Sample for Variances				F-Test Two-Sample for Variances				F-Test Two-Sample for Variances
Size_M08_vs_klara_male				Size_M08_vs_klara_female				Weight_M08_vs_klara_male				Weight_M08_vs_klara_female
	Variable 1	Variable 2			Variable 1	Variable 2			Variable 1	Variable 2			Variable 1	Variable 2
Mean	3.79	3.74		Mean	3.44	3.22		Mean	676.8	555.6		Mean	451	368.2
Variance	0.1305	0.168		Variance	0.068	0.032		Variance	62445.2	38279.3		Variance	13316	2873.2
Observations	5	5		Observations	5	5		Observations	5	5		Observations	5	5
df	4	4		df	4	4		df	4	4		df	4	4
F	0.776786			F	2.125			F	1.6313			F	4.63455
P(F<=f) one-tail	0.406275			P(F<=f) one-tail	0.241664			P(F<=f) one-tail	0.323512			P(F<=f) one-tail	0.0833133
F Critical one-tail	0.156538			F Critical one-tail	6.38823			F Critical one-tail	6.38823			F Critical one-tail	6.38823
EQUAL VARIANCE				EQUAL VARIANCE				EQUAL VARIANCE				EQUAL VARIANCE
ttest_Male				ttest_female
Size	0.842967	n.s.		Size	0.158405	n.s.
Weight	0.417981	n.s.		Weight	0.18372	n.s.
