# Supplementary material for: Generation of a transparent killifish line through multiplex CRISPR/Cas9mediated gene inactivation
Source: eLife journal article supplement (doi:10.7554/elife.81549), 2023-02-23
Supplement: fig3-data1 [file Egg_collection_panel_a.xlsx]

## Sheet: 3A
	COLLECTION		Week 1		Week 2		Week 3		Week 4
	Breeding pair G1		Put on plate	already dead	Put on plate	already dead	Put on plate	already dead	Put on plate	already dead
			256	25	247	22	182	14	180	17
	Breeding pair G2		Put on plate	already dead	Put on plate	already dead	Put on plate	already dead	Put on plate	already dead
			236	50	315	59	273	41	225	29
	Breeding pair G3		Put on plate	already dead	Put on plate	already dead	Put on plate	already dead	Put on plate	already dead
			119	12	196	14	175	19	179	17
	Breeding pair e14		Put on plate	already dead	Put on plate	already dead	Put on plate	already dead	Put on plate	already dead
			263	63	312	75	243	99	260	68
	Breeding pair e15		Put on plate	already dead	Put on plate	already dead	Put on plate	already dead	Put on plate	already dead
			163	143	197	169	151	128	147	123
	Breeding pair e16		Put on plate	already dead	Put on plate	already dead	Put on plate	already dead	Put on plate	already dead
			240	42	267	41	220	62	197	38
	SUM WT		611	87	758	95	630	74	584	63
	STDEV WT		74.0023	19.3132	59.702	24.0069	54.6717	14.3643	26.2742	6.9282
	SUM klara		666	248	776	285	614	289	604	229
	STDEV klara		52.3737	53.2948	57.9511	66.3023	47.8783	33.0807	56.6245	43.1084
	CHECK 1wpc		From Week 1		From Week 2		From Week 3		From Week 4						Amount of eggs on plate										Amount of eggs still alive 1wpc
	Breeding pair G1		Still alive	dead	Still alive	dead	Still alive	dead	Still alive	dead					M08			klara							M08			klara
			210	46	222	25	177	5	164	16					pair G1	pair G2	pair G3	pair e14	pair e15	pair e16	ttest				pair G1	pair G2	pair G3	pair e14	pair e15	pair e16	ttest
	Breeding pair G2		Still alive	dead	Still alive	dead	Still alive	dead	Still alive	dead				Week 1	256	236	119	263	163	240	0.743814	n.s.		Week 1	210	176	87	189	71	190	0.893766	n.s.
			176	66	226	89	186	87	172	53				Week 2	247	315	196	312	197	267	0.906625	n.s.		Week 2	222	226	176	209	63	235	0.523673	n.s.
	Breeding pair G3		Still alive	dead	Still alive	dead	Still alive	dead	Still alive	dead				Week 3	182	273	175	243	151	220	0.904985	n.s.		Week 3	177	186	142	140	52	172	0.287097	n.s.
			87	32	176	20	142	33	151	28				Week 4	180	225	179	260	147	197	0.862246	n.s.		Week 4	164	172	151	142	45	153	0.288052	n.s.
	Breeding pair e14		Still alive	dead	Still alive	dead	Still alive	dead	Still alive	dead
			189	74	209	103	140	103	142	118
	Breeding pair e15		Still alive	dead	Still alive	dead	Still alive	dead	Still alive	dead
			71	92	63	134	52	99	45	102				MEAN NUMBER OF EGGS PER WEEK										MEAN NUMBER OF EGGS STILL ALIVE 1wpc
	Breeding pair e16		Still alive	dead	Still alive	dead	Still alive	dead	Still alive	dead
			190	50	235	32	172	48	153	44				Amount of eggs on plate										Amount of eggs on plate
	SUM WT		473	144	624	134	505	125	487	97					Week 1		Week 2		Week 3		Week 4				Week 1		Week 2		Week 3		Week 4
	STDEV WT		63.5164	17.088	27.7849	38.4751	23.2451	41.6813	10.5987	18.8768					M08	klara	M08	klara	M08	klara	M08	klara			M08	klara	M08	klara	M08	klara	M08	klara
	SUM klara		450	216	507	269	364	250	340	264				Mean	203.667	222	252.667	258.667	210	204.667	194.667	201.333		Mean	157.667	150	208	169	168.333	121.333	162.333	113.333
	STDEV klara		68.4178	21.0713	92.7146	52.2909	62.1396	30.6649	59.4334	38.9358				STDEV	74.0023	52.3737	59.702	57.9511	54.6717	47.8783	26.2742	56.6245		STDEV	63.5164	68.4178	27.7849	92.7146	23.2451	62.1396	10.5987	59.4334
																ttest										ttest
															Week 1	0.743814	n.s.								Week 1	0.893766	n.s.
															Week 2	0.906625	n.s.								Week 2	0.523673	n.s.
															Week 3	0.904985	n.s.								Week 3	0.287097	n.s.
															Week 4	0.862246	n.s.								Week 4	0.288052	n.s.
														F-Test Two-Sample for Variances					F-Test Two-Sample for Variances					F-Test Two-Sample for Variances					F-Test Two-Sample for Variances
														Week 1					Week 2					Week 1					Week 2
															Variable 1	Variable 2				Variable 1	Variable 2				Variable 1	Variable 2				Variable 1	Variable 2
														Mean	203.667	222			Mean	252.667	258.667			Mean	150	157.667			Mean	169	208
														Variance	5476.33	2743			Variance	3564.33	3358.33			Variance	4681	4034.33			Variance	8596	772
														Observations	3	3			Observations	3	3			Observations	3	3			Observations	3	3
														df	2	2			df	2	2			df	2	2			df	2	2
														F	1.99648				F	1.06134				F	1.16029				F	11.1347
														P(F<=f) one-tail	0.333725				P(F<=f) one-tail	0.485121				P(F<=f) one-tail	0.462901				P(F<=f) one-tail	0.0824082
														F Critical one-tail	19				F Critical one-tail	19				F Critical one-tail	19				F Critical one-tail	19
														EQUAL VARIANCE					EQUAL VARIANCE					EQUAL VARIANCE					EQUAL VARIANCE
														F-Test Two-Sample for Variances					F-Test Two-Sample for Variances					F-Test Two-Sample for Variances					F-Test Two-Sample for Variances
														Week 3					Week 4					Week 3					Week 4
															Variable 1	Variable 2				Variable 1	Variable 2				Variable 1	Variable 2				Variable 1	Variable 2
														Mean	210	204.667			Mean	201.333	194.667			Mean	121.333	168.333			Mean	113.333	162.333
														Variance	2989	2292.33			Variance	3206.33	690.333			Variance	3861.33	540.333			Variance	3532.33	112.333
														Observations	3	3			Observations	3	3			Observations	3	3			Observations	3	3
														df	2	2			df	2	2			df	2	2			df	2	2
														F	1.30391				F	4.64462				F	7.14621				F	31.4451
														P(F<=f) one-tail	0.434044				P(F<=f) one-tail	0.17716				P(F<=f) one-tail	0.122757				P(F<=f) one-tail	0.0308213
														F Critical one-tail	19				F Critical one-tail	19				F Critical one-tail	19				F Critical one-tail	19
														EQUAL VARIANCE					EQUAL VARIANCE					EQUAL VARIANCE					UNEQUAL VARIANCE
