# Supplementary material for: Generation of a transparent killifish line through multiplex CRISPR/Cas9mediated gene inactivation
Source: eLife journal article supplement (doi:10.7554/elife.81549), 2023-02-23
Supplement: fig3-data1 [file Genotypes_panel_b.xlsx]

## Sheet: Genotypes_panel_b
FINAL Sum				Per cent
	Wild type female	klara female	Gesamt	Wild type female	klara female
Pair 1	253	79	332	76.2048	23.7952
Pair 2	259	86	345	75.0725	24.9275
	Wild type male	klara male
Pair 3	240	6	246	97.561	2.43902
Pair 4	229	23	252	90.873	9.12698
Individual values
	ROUND 1	Week 1			ROUND 1	Week 2			ROUND 1	Week 3			ROUND 1	Week 4				Sum - weeks
		Wild type female	klara female			Wild type female	klara female			Wild type female	klara female			Wild type female	klara female				Wild type female	klara female
	Pair 1	15	12		Pair 1	22	7		Pair 1	23	7		Pair 1	12	1			Pair 1	72	27
		Wild type female	klara female			Wild type female	klara female			Wild type female	klara female			Wild type female	klara female			Pair 2	94	27
	Pair 2	16	13		Pair 2	25	6		Pair 2	22	5		Pair 2	31	3				Wild type male	klara male
		Wild type male	klara male			Wild type male	klara male			Wild type male	klara male			Wild type male	klara male			Pair 3	113	5
	Pair 3	10	0		Pair 3	42	0		Pair 3	32	0		Pair 3	29	5			Pair 4	1	0
		Wild type male	klara male			Wild type male	klara male			Wild type male	klara male			Wild type male	klara male
	Pair 4	1	0		Pair 4	-	-		Pair 4	-	-		Pair 4	-	-
	Round 2	Week 1			Round 2	Week 2			Round 2	Week 3			Round 2	Week 4				Sum - weeks
		Wild type female	klara female			Wild type female	klara female			Wild type female	klara female			Wild type female	klara female				Wild type female	klara female
	Pair 1	25	5		Pair 1	16	14		Pair 1	15	8		Pair 1	26	5			Pair 1	82	32
		Wild type female	klara female			Wild type female	klara female			Wild type female	klara female			Wild type female	klara female			Pair 2	91	12
	Pair 2	21	8		Pair 2	30	2		Pair 2	22	2		Pair 2	18	0				Wild type male	klara male
		Wild type male	klara male			Wild type male	klara male			Wild type male	klara male			Wild type male	klara male			Pair 3	0	0
	Pair 3	-	-		Pair 3	-	-		Pair 3	-	-		Pair 3	-	-			Pair 4	111	20
		Wild type male	klara male			Wild type male	klara male			Wild type male	klara male			Wild type male	klara male
	Pair 4	27	4		Pair 4	50	10		Pair 4	23	5		Pair 4	11	1
	Round 3	Week 1			Round 3	Week 2			Round 3	Week 3			Round 3	Week 4				Sum - weeks
		Wild type female	klara female			Wild type female	klara female			Wild type female	klara female			Wild type female	klara female				Wild type female	klara female
	Pair 1	21	8		Pair 1	24	2		Pair 1	22	4		Pair 1	32	6			Pair 1	99	20
		Wild type female	klara female			Wild type female	klara female			Wild type female	klara female			Wild type female	klara female			Pair 2	74	47
	Pair 2	10	18		Pair 2	22	7		Pair 2	21	9		Pair 2	21	13				Wild type male	klara male
		Wild type male	klara male			Wild type male	klara male			Wild type male	klara male			Wild type male	klara male			Pair 3	127	1
	Pair 3	20	0		Pair 3	40	0		Pair 3	27	1		Pair 3	40	0			Pair 4	117	3
		Wild type male	klara male			Wild type male	klara male			Wild type male	klara male			Wild type male	klara male
	Pair 4	22	0		Pair 4	23	0		Pair 4	45	2		Pair 4	27	1
