# Supplementary material for: Generation of a transparent killifish line through multiplex CRISPR/Cas9mediated gene inactivation
Source: eLife journal article supplement (doi:10.7554/elife.81549), 2023-02-23
Supplement: fig3-data1 [file Panel_c.xls]

## Sheet: Data_panel_c
SIZE					Weight
WT male	WT female	klara male	klara female		WT male	WT female	klara male	klara female
5.6	5.1	5.9	4.6		2.5	1.42	2.17	0.89
5.6	4.4	5.2	4.5		2.5	0.92	1.35	0.84
5.7	4.3	5.6	4.4		2.12	0.86	2.03	0.78
6	4.7	5.5	4.8		2.48	1.01	1.81	1.16
5.5	5	6.1	5.2		2.08	2.09	2.17	1.47
5.5	4	5.5	4		2.07	1.02	1.72	1.07
5.9	4.7	5.7	4.8		2.28	1.43	1.97	1
5.5	5.1	5.3	4.3		2.17	1.34	1.55	0.79
5.7	5	5			2.46	1.28	1.39
F-Test Two-Sample for Variances				F-Test Two-Sample for Variances
WT male vs WT female				WT male vs WT female
	Variable 1	Variable 2			Variable 1	Variable 2					ttest	SIZE		WEIGHT
Mean	5.66667	4.7		Mean	2.29556	1.26333					WT male vs WT female	3.08328e-05	***	1.02839e-05	***
Variance	0.0325	0.155		Variance	0.0361028	0.143225					WT female vs klara female	0.509598	n.s.	0.110091	n.s.
Observations	9	9		Observations	9	9					WT male vs klara male	0.321884	n.s.	0.000881164	***
df	8	8		df	8	8					klara male vs klara female	5.27408e-05	***	3.21961e-05	***
F	0.209677			F	0.25207
P(F<=f) one-tail	0.0202549			P(F<=f) one-tail	0.0341082
F Critical one-tail	0.290858			F Critical one-tail	0.290858
UNEQUAL VARIANCE				UNEQUAL VARIANCE
F-Test Two-Sample for Variances				F-Test Two-Sample for Variances
WT female vs klara female				WT female vs klara female
	Variable 1	Variable 2			Variable 1	Variable 2
Mean	4.7	4.575		Mean	1.26333	1
Variance	0.155	0.133571		Variance	0.143225	0.0545143
Observations	9	8		Observations	9	8
df	8	7		df	8	7
F	1.16043			F	2.62729
P(F<=f) one-tail	0.428699			P(F<=f) one-tail	0.110309
F Critical one-tail	3.72573			F Critical one-tail	3.72573
EQUAL VARIANCE				EQUAL VARIANCE
F-Test Two-Sample for Variances				F-Test Two-Sample for Variances
WT male vs klara male				WT male vs klara male
	Variable 1	Variable 2			Variable 1	Variable 2
Mean	5.66667	5.53333		Mean	2.29556	1.79556
Variance	0.0325	0.1175		Variance	0.0361028	0.0993778
Observations	9	9		Observations	9	9
df	8	8		df	8	8
F	0.276596			F	0.363288
P(F<=f) one-tail	0.0438171			P(F<=f) one-tail	0.0867734
F Critical one-tail	0.290858			F Critical one-tail	0.290858
UNEQUAL VARIANCE				EQUAL VARIANCE
F-Test Two-Sample for Variances				F-Test Two-Sample for Variances
klara male vs klara female				klara male vs klara female
	Variable 1	Variable 2			Variable 1	Variable 2
Mean	5.53333	4.575		Mean	1.79556	1
Variance	0.1175	0.133571		Variance	0.0993778	0.0545143
Observations	9	8		Observations	9	8
df	8	7		df	8	7
F	0.879679			F	1.82297
P(F<=f) one-tail	0.426171			P(F<=f) one-tail	0.221734
F Critical one-tail	0.285676			F Critical one-tail	3.72573
EQUAL VARIANCE				EQUAL VARIANCE
