# Supplementary material for: Generation of a transparent killifish line through multiplex CRISPR/Cas9mediated gene inactivation
Source: eLife journal article supplement (doi:10.7554/elife.81549), 2023-02-23

Clip. 1 BQ 20 WL 10 Sequence: #2

Clipped length: 612  
Left clip: 18  
Right clip: 629  
Avg. qual. in clip.: 49.18

Samples: 15898  
Bases: 630  
Average spacing: 26.0  
Average quality >= 10: 43, 20: 88, 30: 482

Quality: 0 - 9  
10 - 19  
20 - 29  
≥ 30

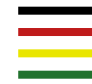

Page: 1 / 3  
15.01.2020

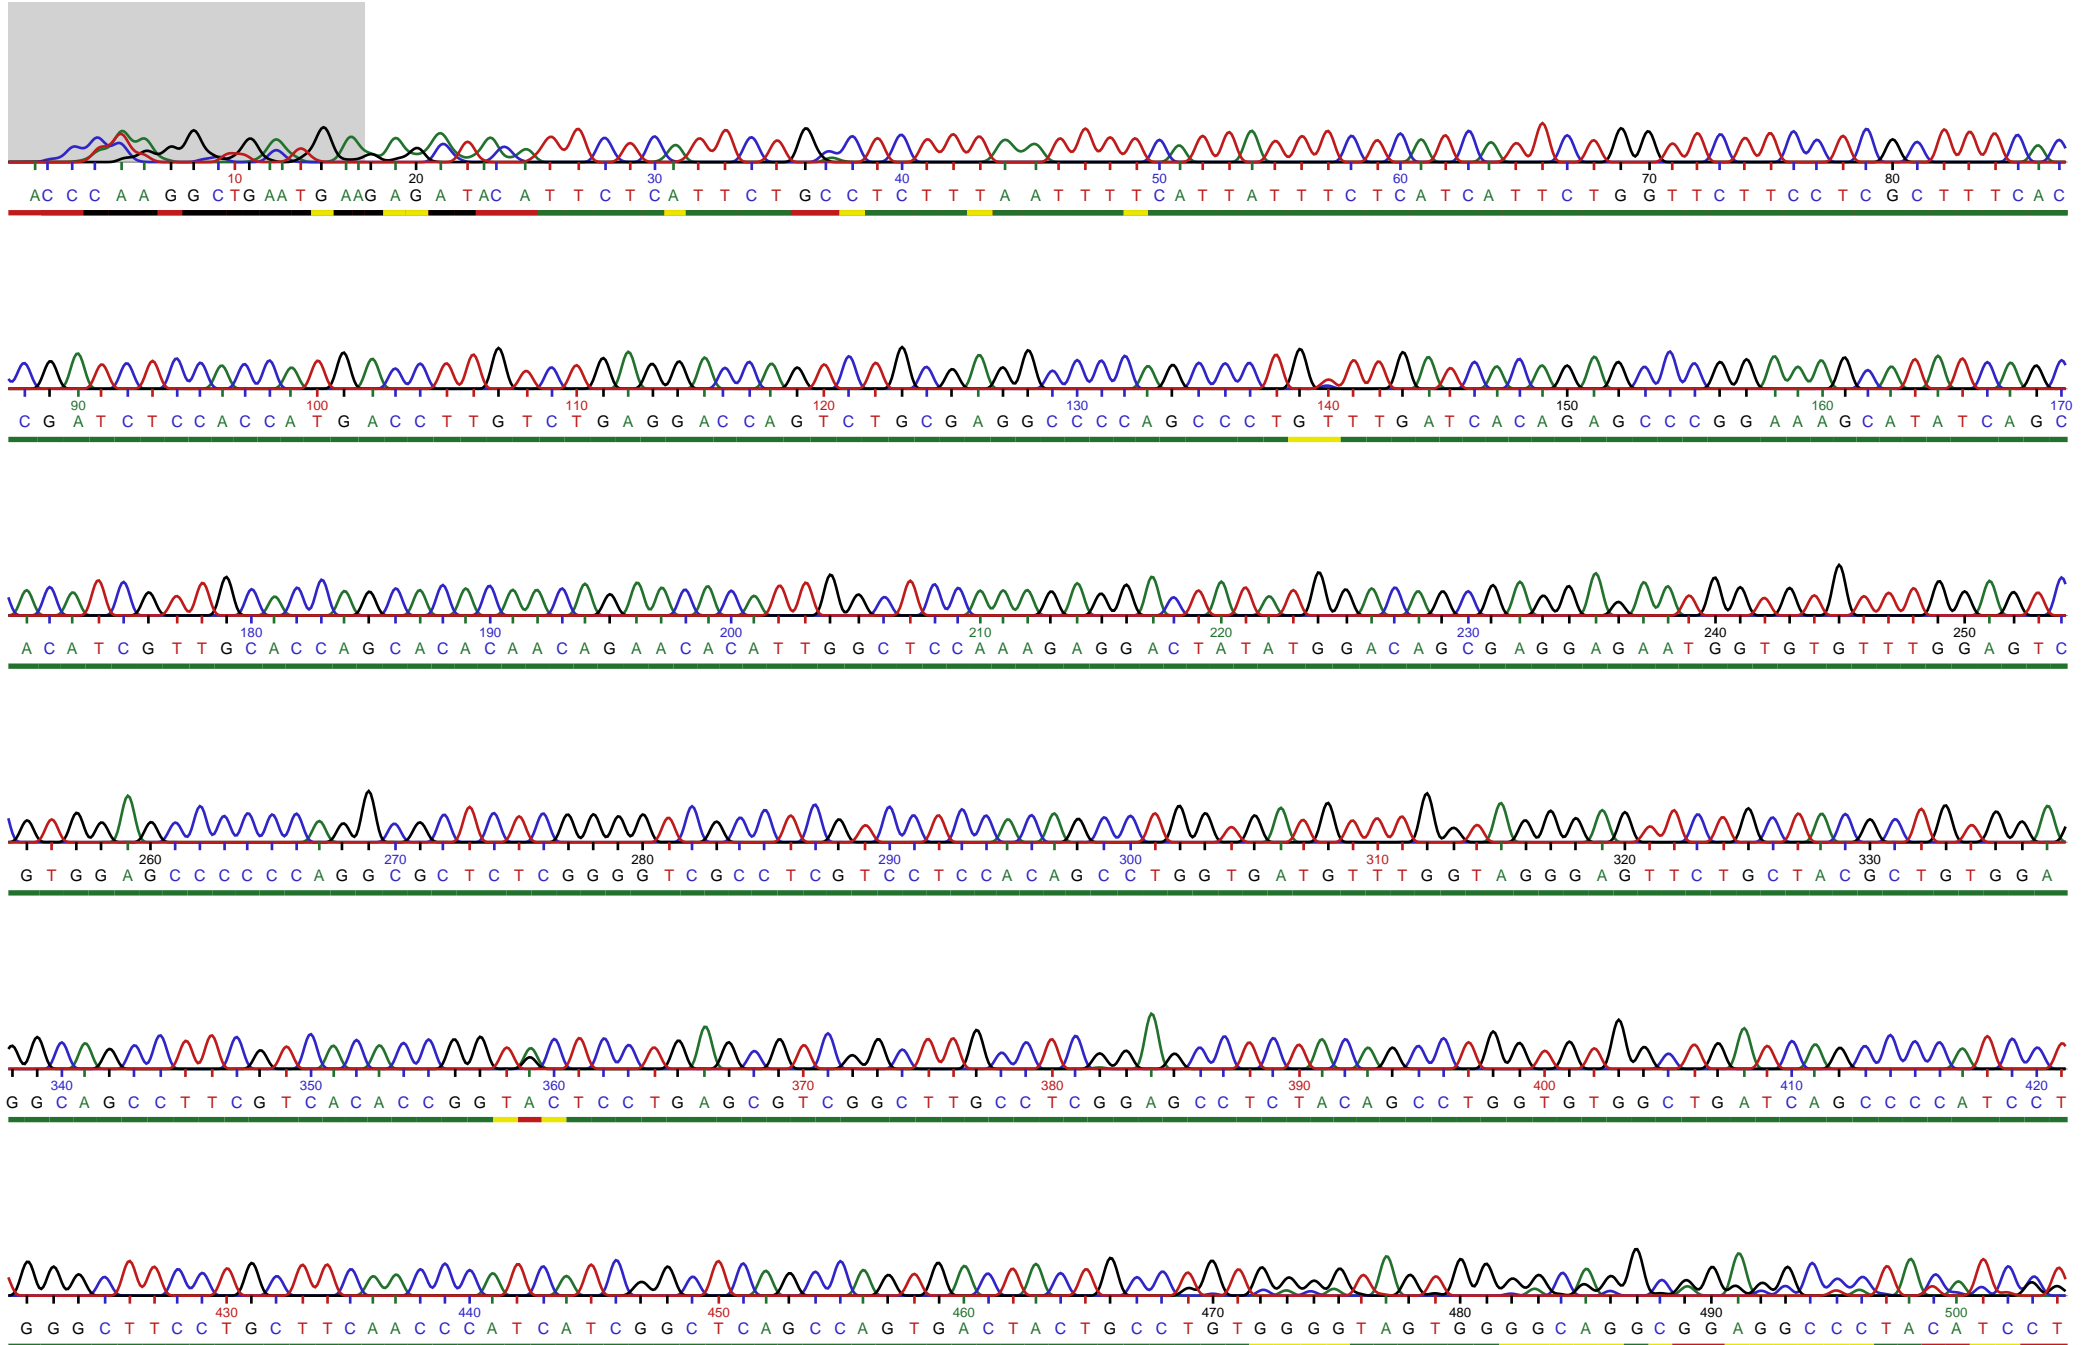

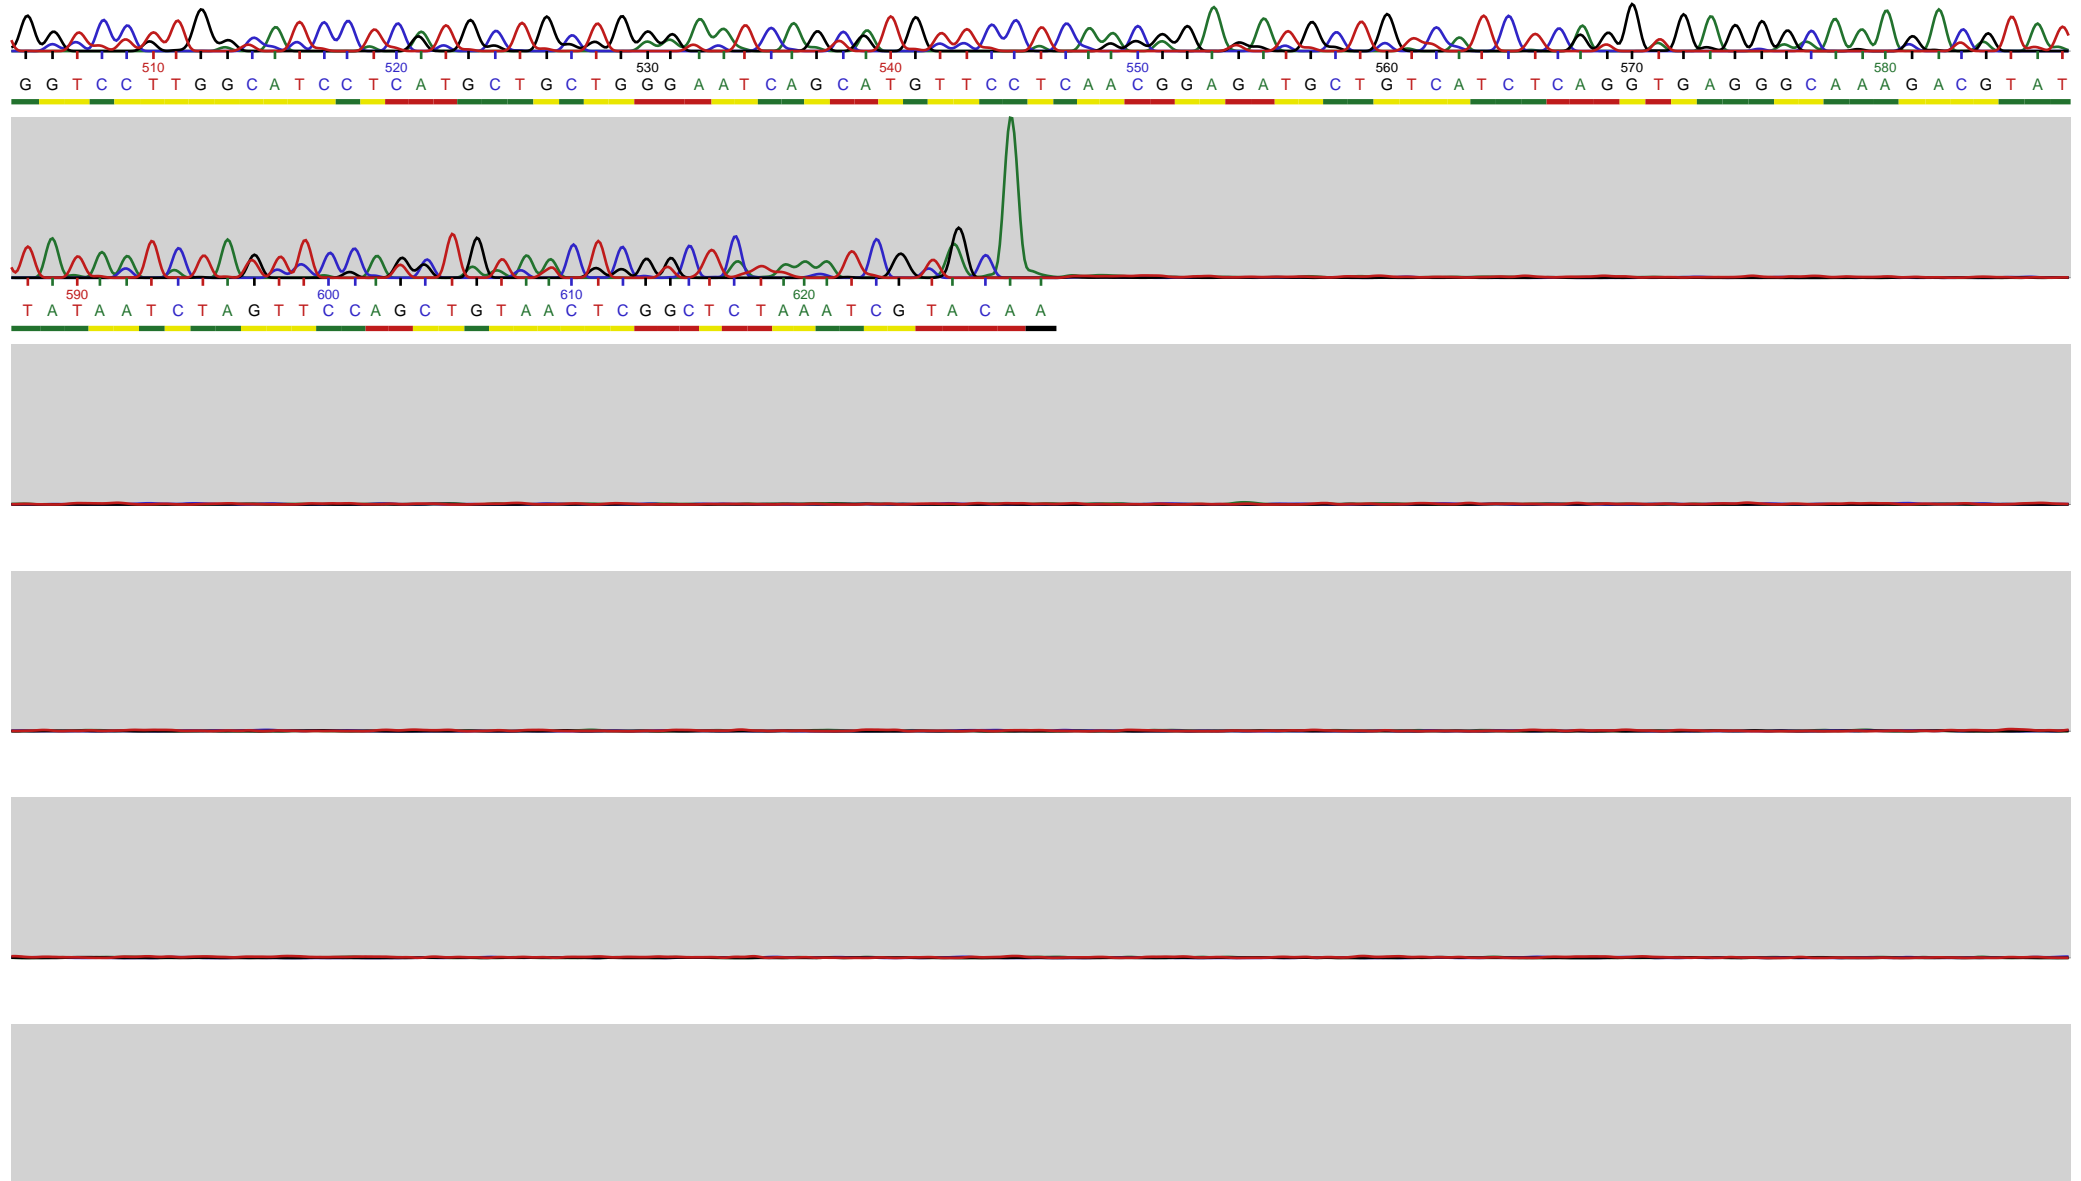

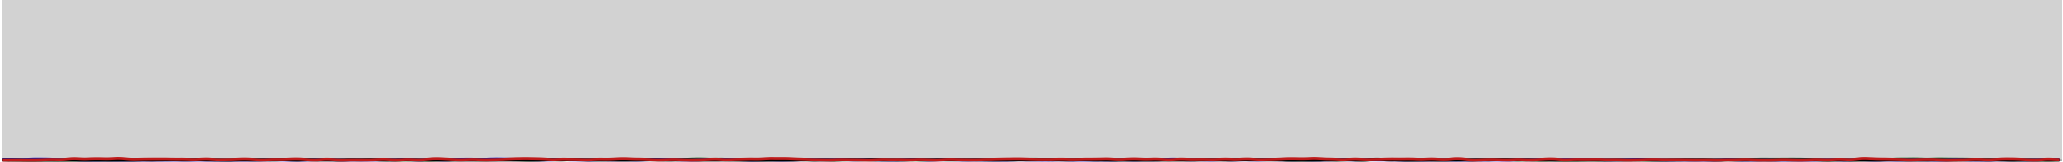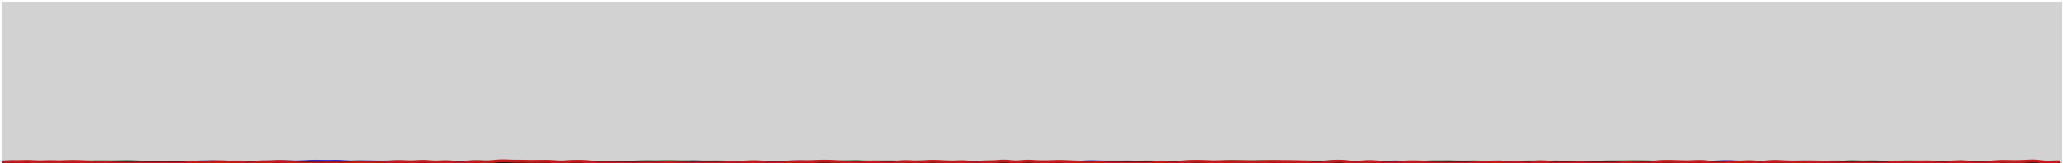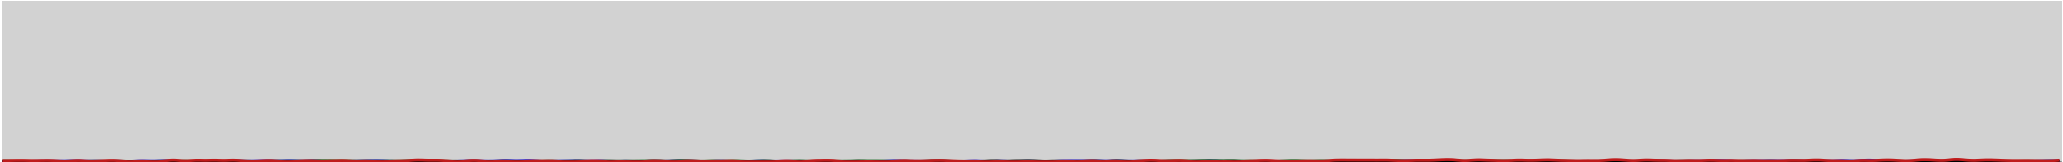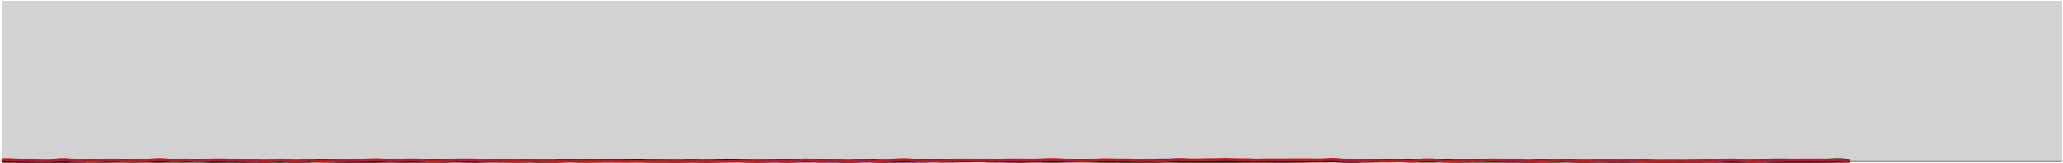

Supplement: fig4-figsupp1-data1 [file 2.pdf › Figure_4_figure_supplement_1_source_data/Figure_4_figure_supplement_1_panel_E_source_data/Originals_Sequencing_data/Fish_2/#2.pdf]
