# Supplementary material for: Generation of a transparent killifish line through multiplex CRISPR/Cas9mediated gene inactivation
Source: eLife journal article supplement (doi:10.7554/elife.81549), 2023-02-23

Clip. 1 BQ 20 WL 10 Sequence: #29

Clipped length: 611  
Left clip: 21  
Right clip: 631  
Avg. qual. in clip.: 50.82

Samples: 14231  
Bases: 632  
Average spacing: 23.0  
Average quality >= 10: 27, 20: 72, 30: 519

Quality: 0 - 9  
10 - 19  
20 - 29  
≥ 30

Page: 1 / 3  
15.01.2020

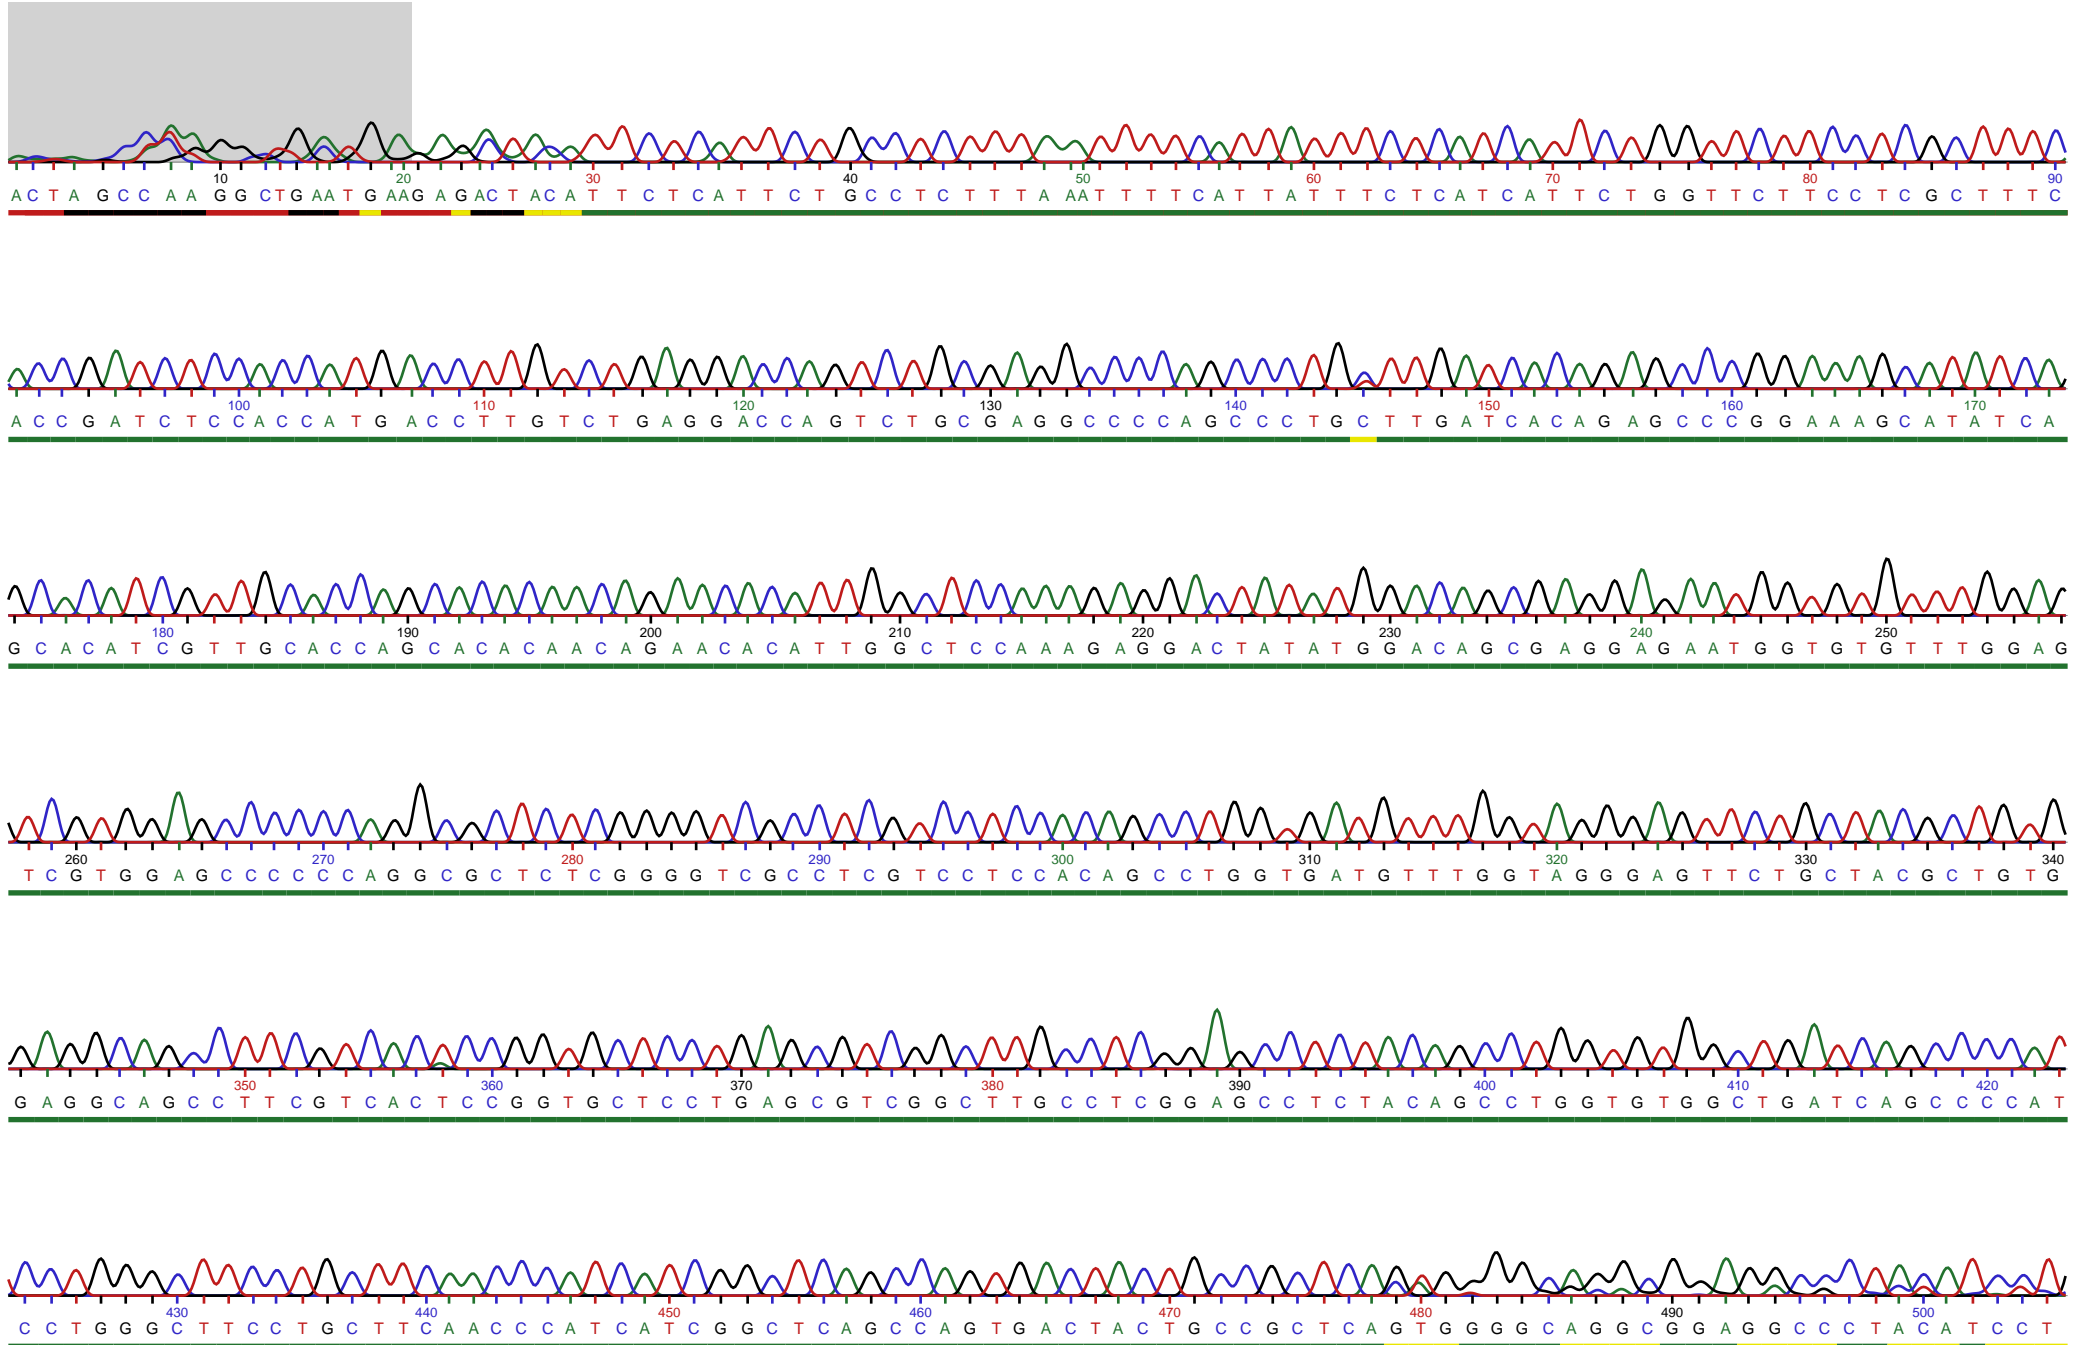

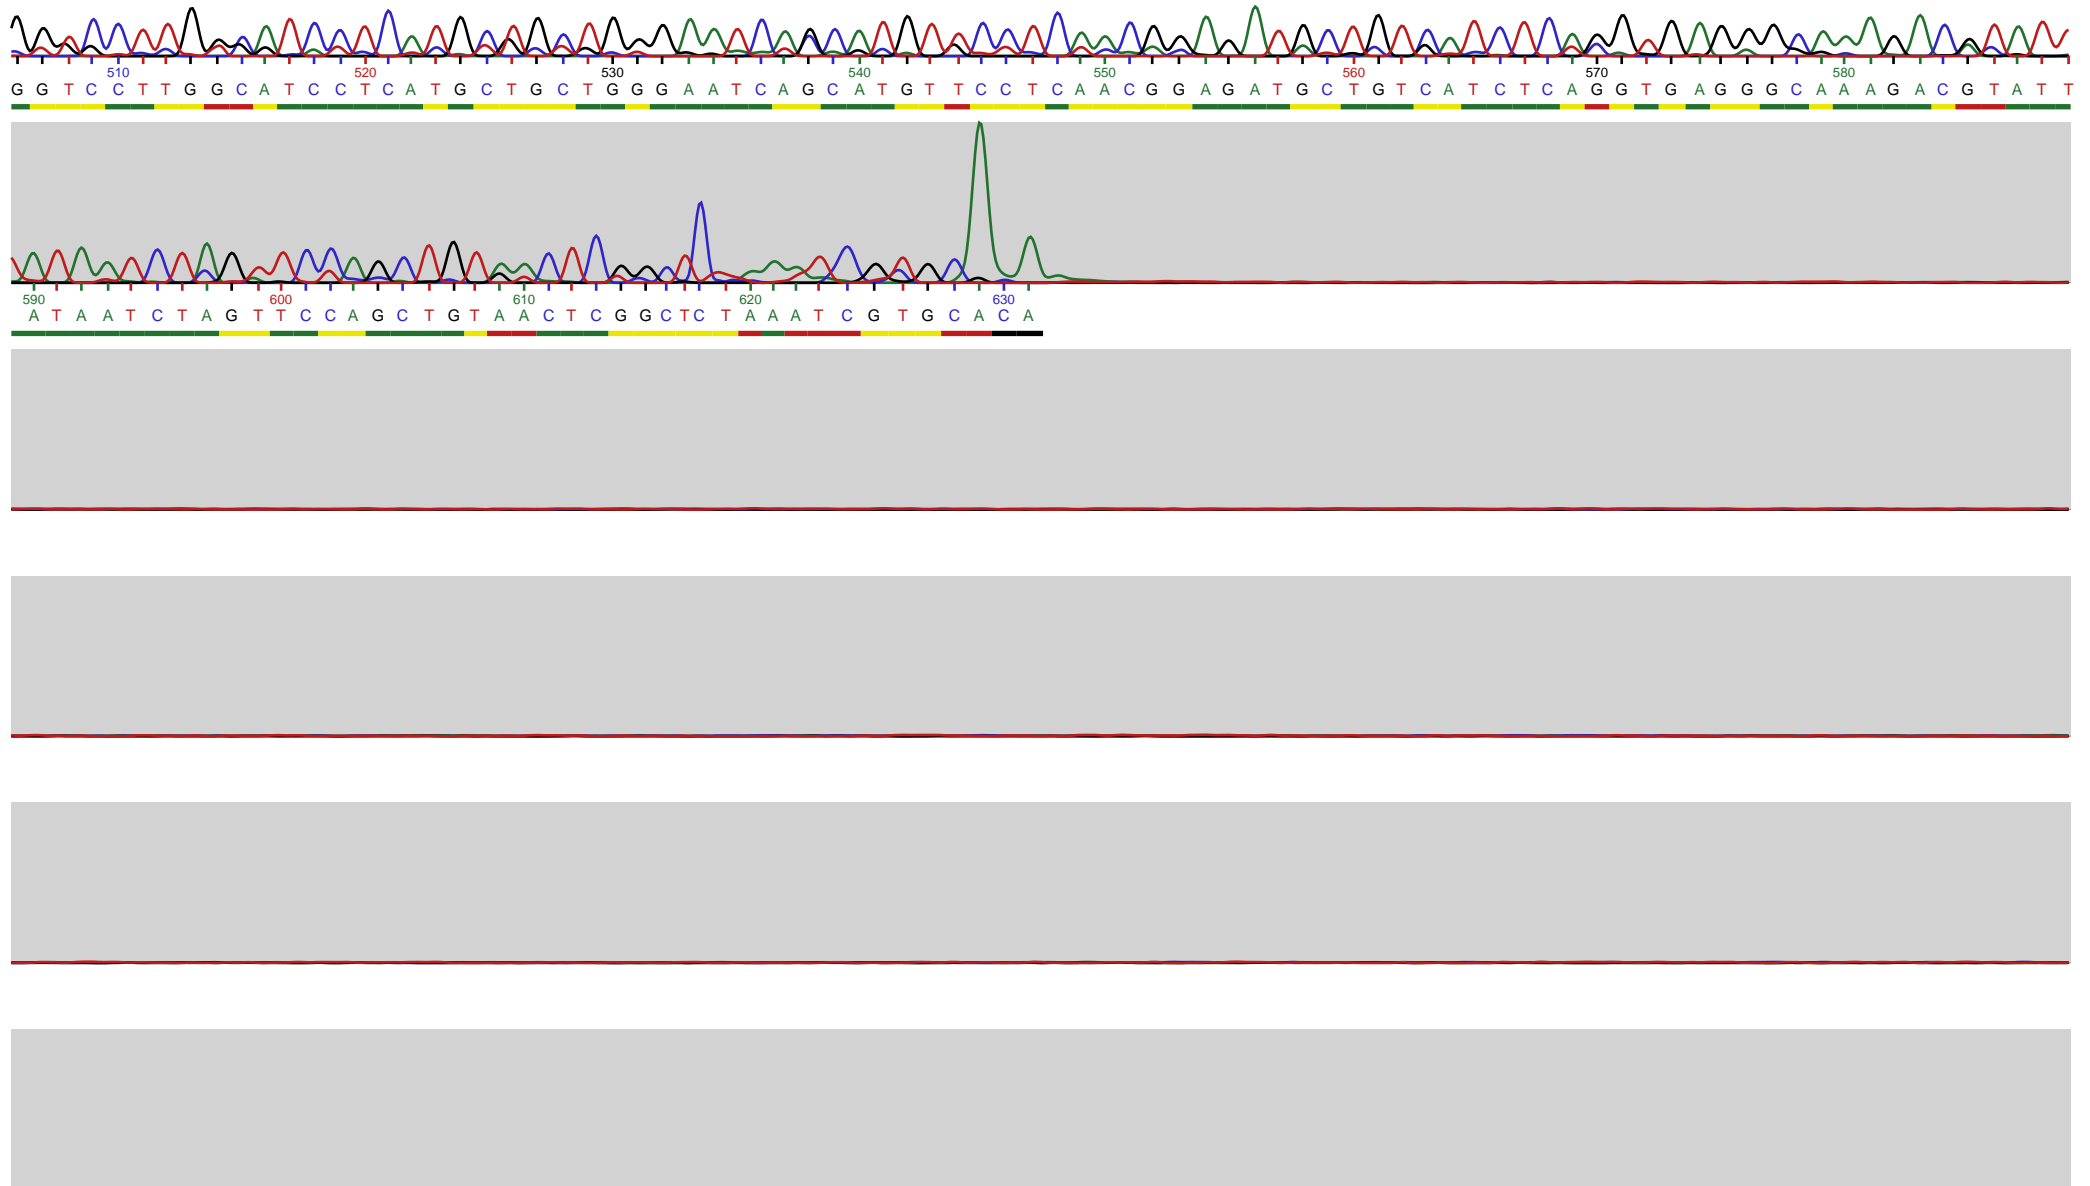

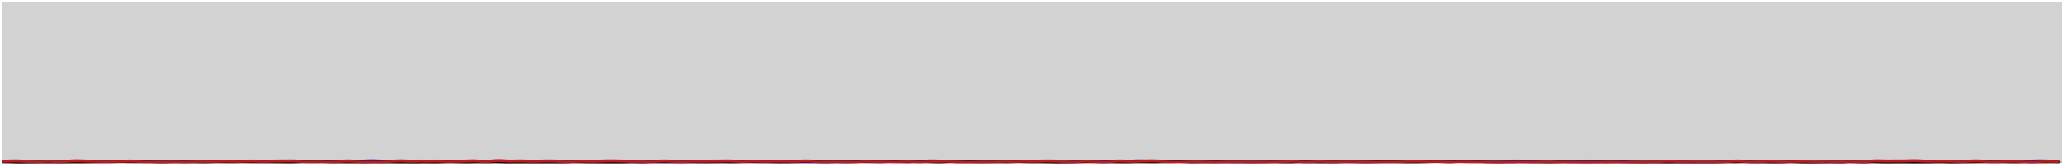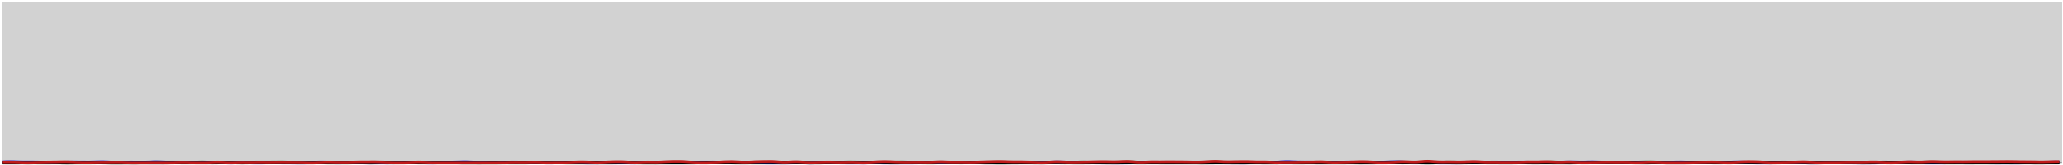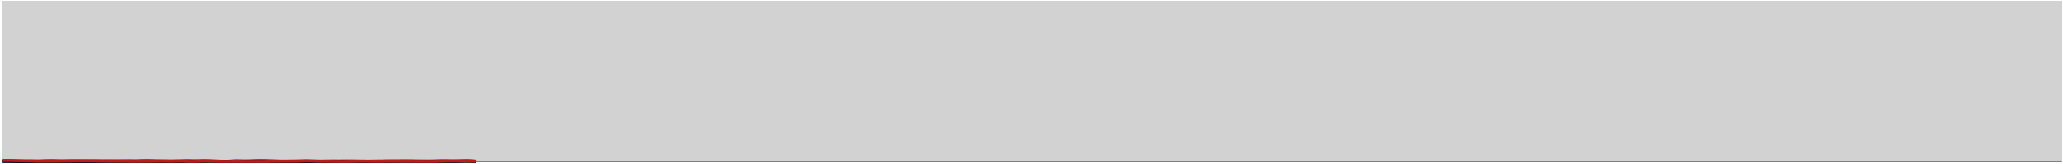

Supplement: fig4-figsupp1-data1 [file 29.pdf › Figure_4_figure_supplement_1_source_data/Figure_4_figure_supplement_1_panel_E_source_data/Originals_Sequencing_data/Fish_29/#29.pdf]
