# Supplementary material for: Generation of a transparent killifish line through multiplex CRISPR/Cas9mediated gene inactivation
Source: eLife journal article supplement (doi:10.7554/elife.81549), 2023-02-23
Supplement: fig4-figsupp1-data1 [file slc45a2_F1_seq.docx]

**Sequencing slc45a2_F1_fish**

>WT

*GGATTTGGTGTTTTGGCCCT*ATATCCTTCACCGGGCTGACTGAGAGACTACATTCTCATTCTGCCTCTTTAAATTTTCATTATTTCTCATCATTCTGGTTCTTCCTCGCTTTCACCGATCTCCACC**ATG**ACCTTGTCTGAGGACCAGTCTGCGAGGCCCCAGCCCTGCTTGATCACAGAGCCCGGAAAGCATATCAGCACATCGTTGCACCAGCACACAACAGAACACATTGGCTTCAAAGAGGACTATATGGACAGCGAGGAGAATGGTGTGTTTGGAGTCGTGGAGCCCCCCAGGCGCTCTCGGGGTCGCCTCGTCCTCCACAGCCTGGTGATGTTTGGTAGGGAGTTCTGCTACGCTGTGGAGGCAGCCTTCGTCACACCGGTACTCCTGAGCGTCGGCTTGCCTCGGAGCCTCTACAGCCTGGTGTGGCTGATCAGCCCCATCCTGGGCTTCCTGCTTCAACCCATCATCGGCTCAGCCAGTGACTACTGCCGCTCACAGTGGGGCAGGCGGAGGCCCTACATCCTGGTCCTTGGCATCCTCATGCTGCTGGGAATCAGCATGTTCCTCAACGGAGATGCTGTCATCTCAGGTGAGGGCAAAGACGTATTATAATCTAGTTCCAGCT*GTAACTCGGCTCTAATCGTGC*

>#2

GAGATACATTCTCATTCTGCCTCTTTAATTTTCATTATTTCTCATCATTCTGGTTCTTCCTCGCTTTCACCGATCTCCACCATGACCTTGTCTGAGGACCAGTCTGCGAGGCCCCAGCCCTGTTTGATCACAGAGCCCGGAAAGCATATCAGCACATCGTTGCACCAGCACACAACAGAACACATTGGCTCCAAAGAGGACTATATGGACAGCGAGGAGAATGGTGTGTTTGGAGTCGTGGAGCCCCCCAGGCGCTCTCGGGGTCGCCTCGTCCTCCACAGCCTGGTGATGTTTGGTAGGGAGTTCTGCTACGCTGTGGAGGCAGCCTTCGTCACACCGGTACTCCTGAGCGTCGGCTTGCCTCGGAGCCTCTACAGCCTGGTGTGGCTGATCAGCCCCATCCTGGGCTTCCTGCTTCAACCCATCATCGGCTCAGCCAGTGACTACTGCCTGTGGGGTAGTGGGGCAGGCGGAGGCCCTACATCCTGGTCCTTGGCATCCTCATGCTGCTGGGAATCAGCATGTTCCTCAACGGAGATGCTGTCATCTCAGGTGAGGGCAAAGACGTATTATAATCTAGTTCCAGCTGTAACTCGGCTCTAAATCGTACAA

>#9

GAGACTACATTCTCATTCTGCCTCTTTAAATTTTCATTATTTCTCATCATTCTGGTTCTTCCTCGCTTTCACCGATCTCCACCATGACCTTGTCTGAGGACCAGTCTGCGAGGCCCCAGCCCTGCTTGATCACAGAGCCCGGAAAGCATATCAGCACATCGTTGCACCAGCACACAACAGAACACATTGGCTCCAAAGAGGACTATATGGACAGCGAGGAGAATGGTGTGTTTGGAGTCGTGGAGCCCCCCAGGCGCTCTCGGGGTCGCCTCGTCCTCCACAGCCTGGTGATGTTTGGTAGGGAGTTCTGCTACGCTGTGGAGGCAGCCTTCGTCACTCCGGTGCTCCTGAGCGTCGGCTTGCCTCGGAGCCTCTACAGCCTGGTGTGGCTGATCAGCCCCATCCTGGGCTTCCTGCTTCAACCCATCATCGGCTCAGCCAGTGACTACTGCTGAGGGGGCAGGCGGAGGCCCTACATCCTGGTCCTTGGCATCCTCATGCTGCTGGGAATCAGCATGTTCCTCAACGGAGATGCTGTCATCTCAGGTGAGGGCAAAGACGTATTATAATCTAGTTCCAGCTGTAACTCGGCTTAATCGTGCACGTGCA

>#29

GAGACTACATTCTCATTCTGCCTCTTTAAATTTTCATTATTTCTCATCATTCTGGTTCTTCCTCGCTTTCACCGATCTCCACCATGACCTTGTCTGAGGACCAGTCTGCGAGGCCCCAGCCCTGCTTGATCACAGAGCCCGGAAAGCATATCAGCACATCGTTGCACCAGCACACAACAGAACACATTGGCTCCAAAGAGGACTATATGGACAGCGAGGAGAATGGTGTGTTTGGAGTCGTGGAGCCCCCCAGGCGCTCTCGGGGTCGCCTCGTCCTCCACAGCCTGGTGATGTTTGGTAGGGAGTTCTGCTACGCTGTGGAGGCAGCCTTCGTCACTCCGGTGCTCCTGAGCGTCGGCTTGCCTCGGAGCCTCTACAGCCTGGTGTGGCTGATCAGCCCCATCCTGGGCTTCCTGCTTCAACCCATCATCGGCTCAGCCAGTGACTACTGCCGCTCAGTGGGGCAGGCGGAGGCCCTACATCCTGGTCCTTGGCATCCTCATGCTGCTGGGAATCAGCATGTTCCTCAACGGAGATGCTGTCATCTCAGGTGAGGGCAAAGACGTATTATAATCTAGTTCCAGCTGTAACTCGGCTCTAAATCGTGCACA
