# Supplementary material for: Generation of a transparent killifish line through multiplex CRISPR/Cas9mediated gene inactivation
Source: eLife journal article supplement (doi:10.7554/elife.81549), 2023-02-23
Supplement: fig5-data1 [file Analysis_FACS_kidney.xlsx]

## Sheet: kidney_male
20230112_male
Sample	Gate	#Events	%Parent	%Total	GFP-A Mean	GFP-A %CV
kidney klara_sytox	living cells	30067	99.5662	36.1817	811	606.1
	GFP+	0	0.0000	0.0000					%Parent_male				GFP-A Mean_male
kidney old 25_sytox	living cells	20370	99.0566	34.2999	1080	348.5			old	adult	young		old	adult	young
	GFP+	91	0.4467	0.1532	25451	113.9			0.4467	0.2509	0.4043		25451	17926	18021
kidney old 54_sytox	living cells	23527	99.1863	32.7733	1126	332.7			0.4165	0.2909	0.23		30053	26179	17701
	GFP+	98	0.4165	0.1365	30053	114.2			0.2851	0.3239	0.2062		18954	21712	16218
kidney old 60_sytox	living cells	19990	99.4428	38.2914	934	289.1			0.4499	0.2336	0.2609		26827	19711	16552
	GFP+	57	0.2851	0.1092	18954	109.5				0.3111	0.1317			19416	16158
kidney old 77_sytox	living cells	17783	99.3075	33.9707	1266	322.5
	GFP+	80	0.4499	0.1528	26827	88.2
kidney adult 8_sytox	living cells	24713	98.6193	27.7213	769	270.1			%Parent_female				GFP-A Mean_female
	GFP+	62	0.2509	0.0695	17926	147.7			old	adult	young		old	adult	young
kidney adult 9_sytox	living cells	18562	99.4322	38.5488	800	348.0			0.7359	0.1795	0.2841		18024	16693	9139
	GFP+	54	0.2909	0.1121	26179	139.4			0.5907	0.3224	0.2836		23827	17532	13818
kidney adult 10_sytox	living cells	24696	98.7642	27.2739	832	301.7			0.8966	0.4786	0.164		20173	14370	7759
	GFP+	80	0.3239	0.0884	21712	111.8			0.3893	0.3929	0.2707		21833	25140	19256
kidney adult 22_sytox	living cells	15413	99.5736	37.3902	726	303.3			0.3418	0.3025			22272	12196
	GFP+	36	0.2336	0.0873	19711	128.9
kidney adult 24_sytox	living cells	14465	99.7174	47.4340	704	303.4
	GFP+	45	0.3111	0.1476	19416	107.8			%Parent_both				GFP-A Mean_both
kidney young 3_sytox	living cells	15828	99.5221	25.9068	1044	232.9			old	adult	young		old	adult	young
	GFP+	64	0.4043	0.1048	18021	90.9			0.4467	0.2509	0.4043		25451	17926	18021
kidney young 5_sytox	living cells	14348	98.9585	24.7115	738	223.2			0.4165	0.2909	0.23		30053	26179	17701
	GFP+	33	0.2300	0.0568	17701	79.8			0.2851	0.3239	0.2062		18954	21712	16218
kidney young 7_sytox	living cells	17461	99.4249	33.2648	700	222.8			0.4499	0.2336	0.2609		26827	19711	16552
	GFP+	36	0.2062	0.0686	16218	146.6			0.7359	0.3111	0.1317		18024	19416	16158
kidney young 8_sytox	living cells	16097	99.0768	27.7181	707	248.9			0.5907	0.1795	0.2841		23827	16693	9139
	GFP+	42	0.2609	0.0723	16552	95.3			0.8966	0.3224	0.2836		20173	17532	13818
kidney young 12_sytox	living cells	21262	96.2778	10.1161	644	220.3			0.3893	0.4786	0.164		21833	14370	7759
	GFP+	28	0.1317	0.0133	16158	127.5			0.3418	0.3929	0.2707		22272	25140	19256
										0.3025				12196

## Sheet: kidney_female
20230111_female
Sample	Gate	#Events	%Parent	%Total	GFP-A Mean	GFP-A %CV
kidney klara_sytox	living cells	21910	99.0641	31.0767	823	198.7
	GFP+	0	0	0
kidney old 39_sytox	living cells	19839	98.2372	17.6867	1981	201.9
	GFP+	146	0.7359	0.1302	18024	116.1				%Parent				GFP-A Mean
kidney old 49_sytox	living cells	25226	97.8814	26.3694	1826	213.8				old	adult	young		old	adult	young
	GFP+	149	0.5907	0.1558	23827	117.8				0.7359	0.1795	0.2841		18024	16693	9139
kidney old 57_sytox	living cells	35133	98.0246	22.4063	2341	178				0.5907	0.3224	0.2836		23827	17532	13818
	GFP+	315	0.8966	0.2009	20173	98.9				0.8966	0.4786	0.164		20173	14370	7759
kidney old 69_sytox	living cells	32882	98.926	37.8354	1603	184.4				0.3893	0.3929	0.2707		21833	25140	19256
	GFP+	128	0.3893	0.1473	21833	107.6				0.3418	0.3025			22272	12196
kidney old 73_sytox	living cells	26914	99.0396	38.8453	1751	169.7
	GFP+	92	0.3418	0.1328	22272	91.7
kidney adult 1_sytox	living cells	23393	99.2659	48.1139	844	191.1
	GFP+	42	0.1795	0.0864	16693	90.9
kidney adult 5_sytox	living cells	19232	96.5704	25.692	1097	235.2
	GFP+	62	0.3224	0.0828	17532	86.6
kidney adult 11_sytox	living cells	56420	89.442	13.9821	1397	176.2
	GFP+	270	0.4786	0.0669	14370	115.2
kidney adult 18_sytox	living cells	30545	98.5482	29.1313	1287	224.1
	GFP+	120	0.3929	0.1144	25140	94
kidney adult 23_sytox	living cells	30744	97.7863	28.7973	1156	153.7
	GFP+	93	0.3025	0.0871	12196	86.2
kidney young 2_sytox	living cells	28516	97.1419	26.5386	1078	127.4
	GFP+	81	0.2841	0.0754	9139	98.3
kidney young 4_sytox	living cells	34207	96.6299	33.659	985	168.6
	GFP+	97	0.2836	0.0954	13818	100.8
kidney young 9_sytox	living cells	18908	99.4477	52.0953	907	159.8
	GFP+	31	0.164	0.0854	7759	103
kidney young 16_sytox	living cells	23276	98.2027	33.6091	1258	162.3
	GFP+	63	0.2707	0.091	19256	121.5
