# Supplementary material for: Generation of a transparent killifish line through multiplex CRISPR/Cas9mediated gene inactivation
Source: eLife journal article supplement (doi:10.7554/elife.81549), 2023-02-23
Supplement: fig5-data1 [file elife-81549-fig5-data1-v3.zip]

# BD FACSDiva 8.0

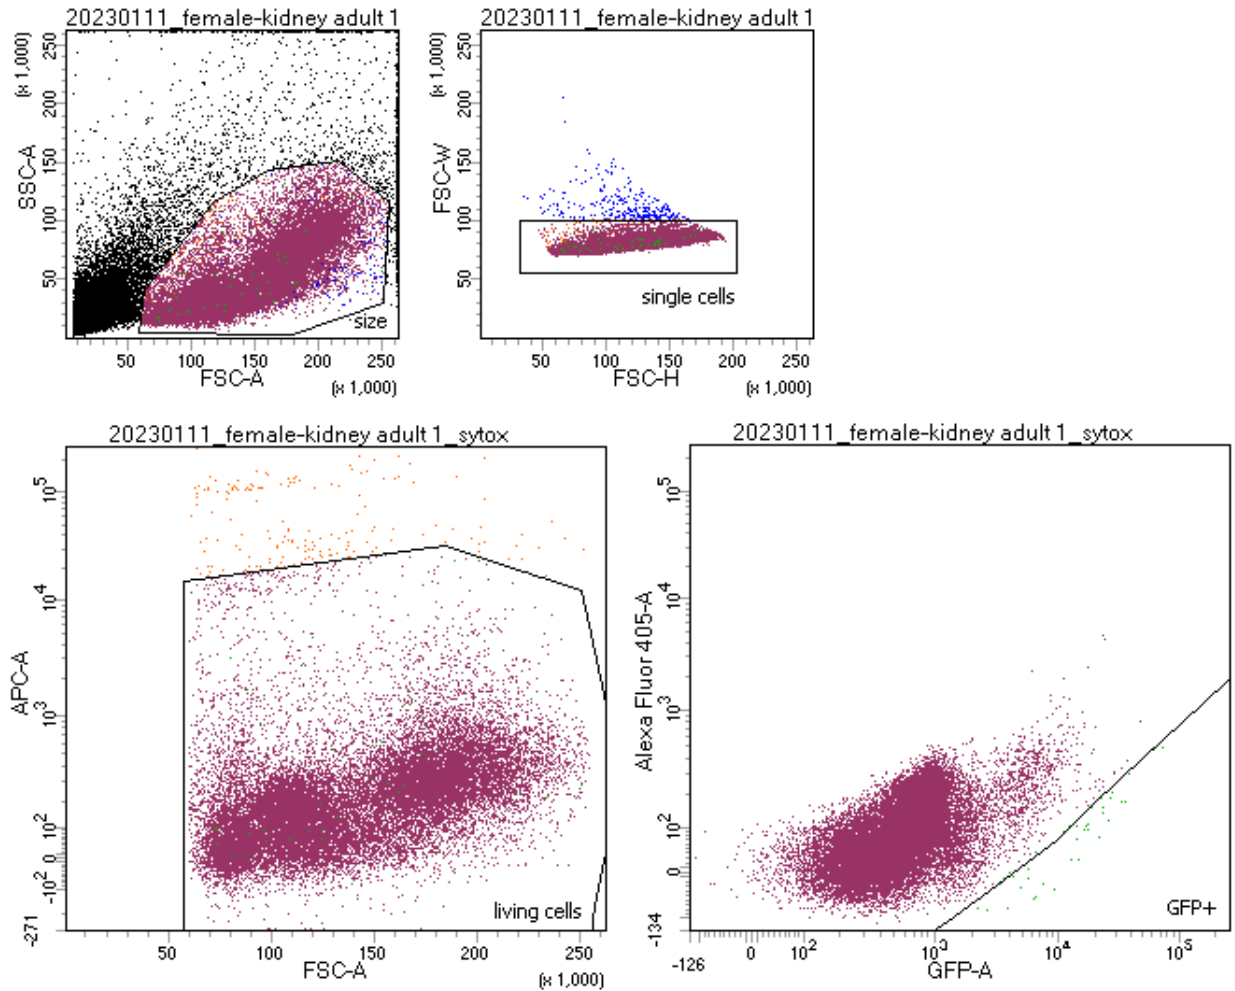

| Tube: kidney adult 1_sytox |         |         |        |
|----------------------------|---------|---------|--------|
| Population                 | #Events | %Parent | %Total |
| ■ All Events               | 48,620  | ####    | 100.0  |
| ■ size                     | 23,828  | 49.0    | 49.0   |
| ■ single cells             | 23,566  | 98.9    | 48.5   |
| ■ living cells             | 23,393  | 99.3    | 48.1   |
| ■ GFP+                     | 42      | 0.2     | 0.1    |

|                  |                        |
|------------------|------------------------|
| Experiment Name: | Johannes_Nothro kidney |
| Specimen Name:   | 20230111_female        |
| Tube Name:       | kidney adult 1_sytox   |

  

| Population     | #Events | %Parent | %Total  | GFP-A Mean | GFP-A %CV |
|----------------|---------|---------|---------|------------|-----------|
| ■ GFP+         | 42      | 0.1795  | 0.0864  | 16,693     | 90.9      |
| ■ living cells | 23,393  | 99.2659 | 48.1139 | 844        | 191.1     |

# BD FACSDiva 8.0

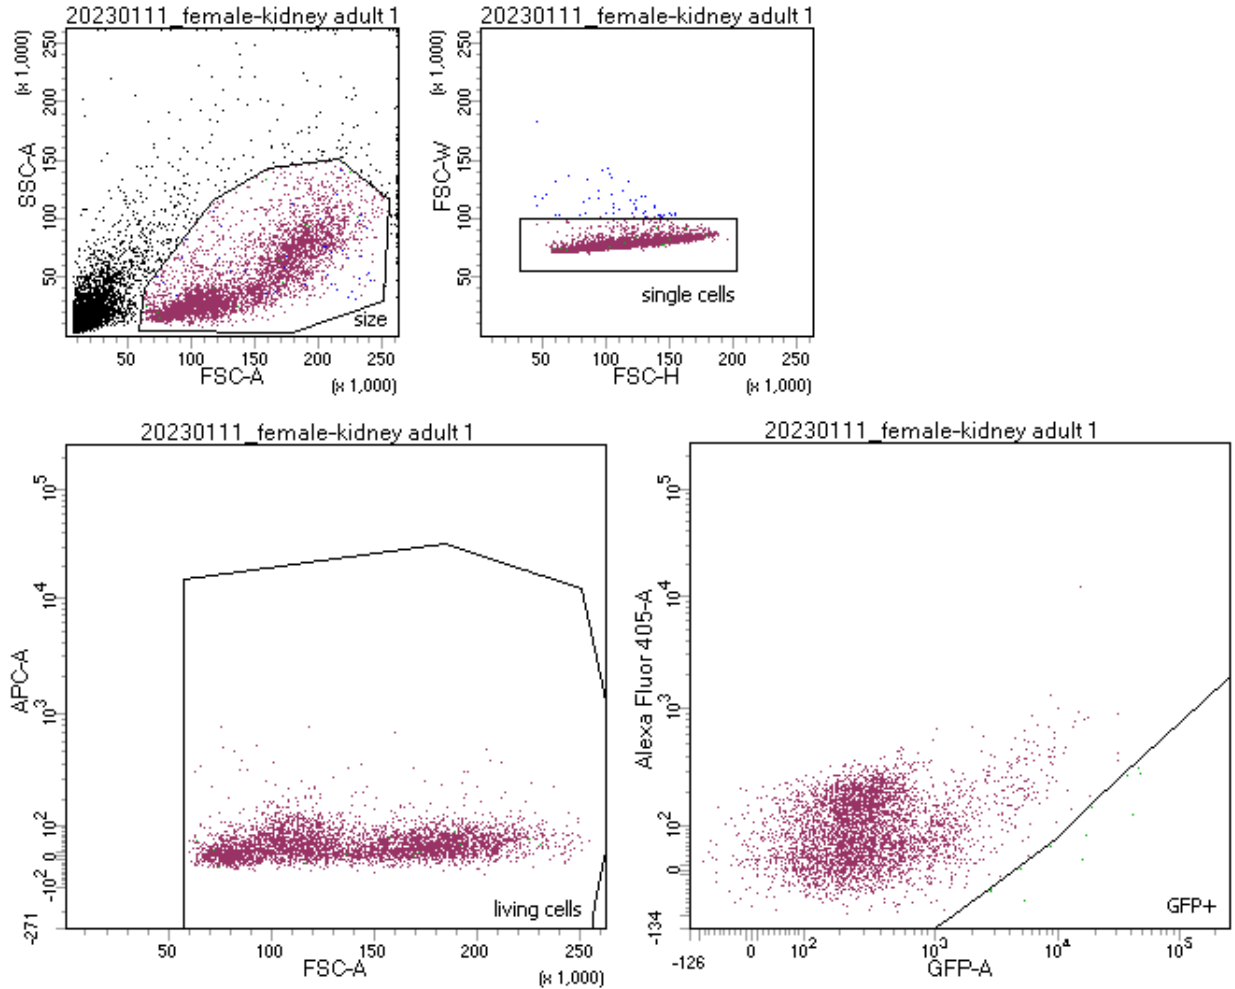

| Tube: kidney adult 1 |         |         |        |
|----------------------|---------|---------|--------|
| Population           | #Events | %Parent | %Total |
| ■ All Events         | 8,320   | ####    | 100.0  |
| ■ size               | 4,211   | 50.6    | 50.6   |
| ■ single cells       | 4,162   | 98.8    | 50.0   |
| ■ living cells       | 4,162   | 100.0   | 50.0   |
| ■ GFP+               | 12      | 0.3     | 0.1    |

|                  |                        |
|------------------|------------------------|
| Experiment Name: | Johannes_Nothro kidney |
| Specimen Name:   | 20230111_female        |
| Tube Name:       | kidney adult 1         |

  

| Population     | #Events | %Parent  | %Total  | GFP-A Mean | GFP-A %CV |
|----------------|---------|----------|---------|------------|-----------|
| ■ GFP+         | 12      | 0.2883   | 0.1442  | 20,714     | 85.0      |
| ■ living cells | 4,162   | 100.0000 | 50.0240 | 641        | 315.2     |

# BD FACSDiva 8.0

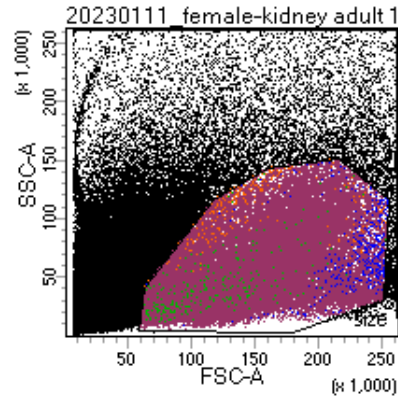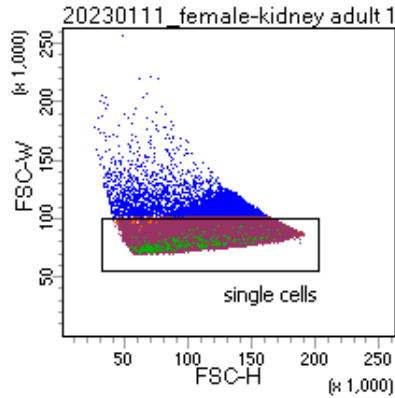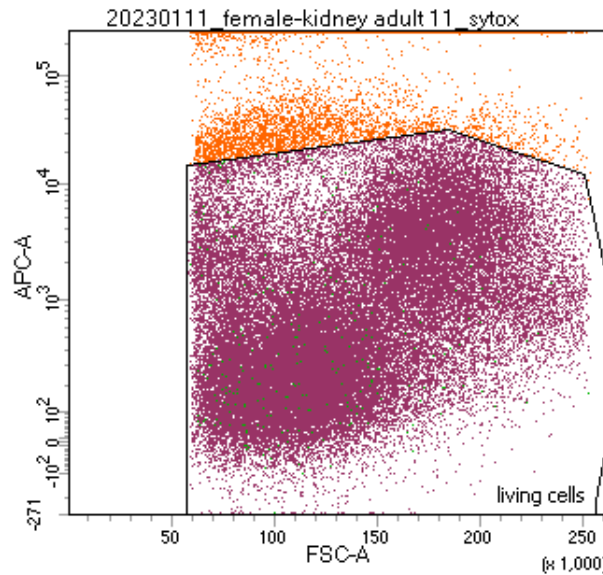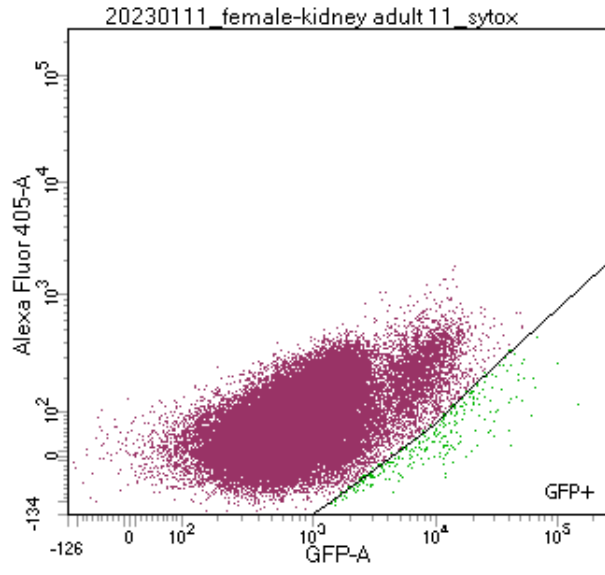

Tube: kidney adult 11\_sytox

| Population   | #Events | %Parent | %Total |
|--------------|---------|---------|--------|
| All Events   | 403,516 | ####    | 100.0  |
| size         | 67,528  | 16.7    | 16.7   |
| single cells | 63,080  | 93.4    | 15.6   |
| living cells | 56,420  | 89.4    | 14.0   |
| GFP+         | 270     | 0.5     | 0.1    |

|                  |                        |
|------------------|------------------------|
| Experiment Name: | Johannes_Nothro kidney |
| Specimen Name:   | 20230111_female        |
| Tube Name:       | kidney adult 11_sytox  |

  

| Population   | #Events | %Parent | %Total  | GFP-A Mean | GFP-A %CV |
|--------------|---------|---------|---------|------------|-----------|
| GFP+         | 270     | 0.4786  | 0.0669  | 14,370     | 115.2     |
| living cells | 56,420  | 89.4420 | 13.9821 | 1,397      | 176.2     |

# BD FACSDiva 8.0

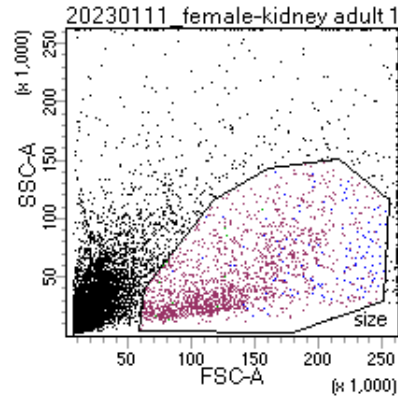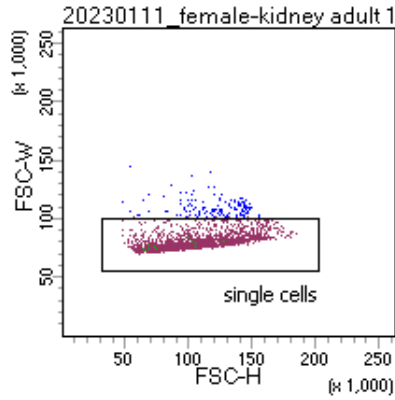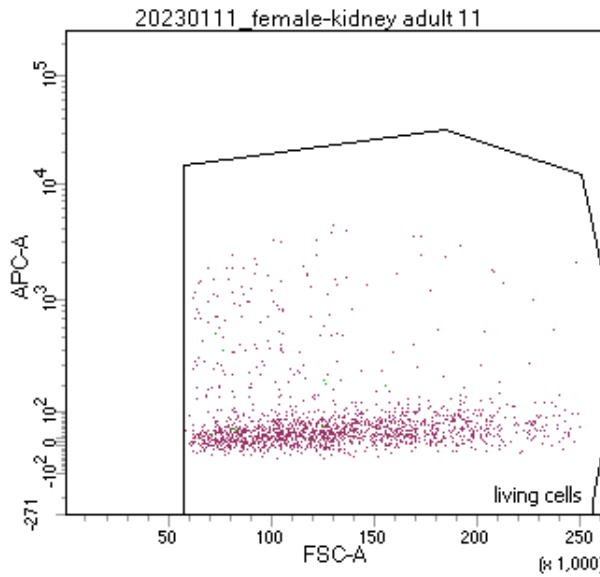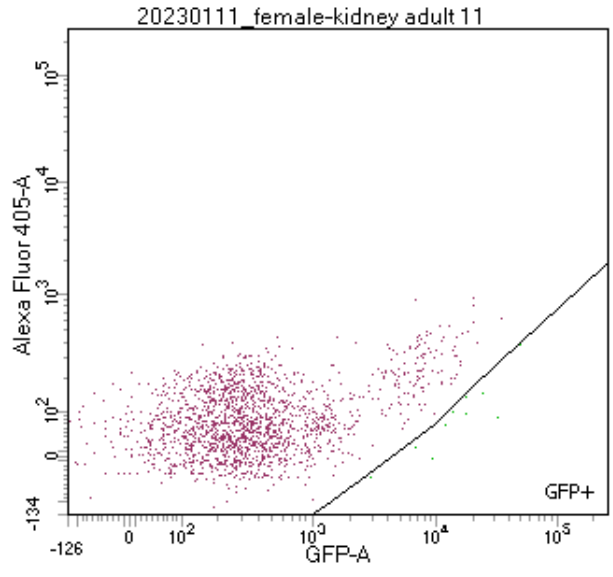

Tube: kidney adult 11

| Population   | #Events | %Parent | %Total |
|--------------|---------|---------|--------|
| All Events   | 10,993  | ####    | 100.0  |
| size         | 1,763   | 16.0    | 16.0   |
| single cells | 1,624   | 92.1    | 14.8   |
| living cells | 1,624   | 100.0   | 14.8   |
| GFP+         | 11      | 0.7     | 0.1    |

|                  |                        |
|------------------|------------------------|
| Experiment Name: | Johannes_Nothro kidney |
| Specimen Name:   | 20230111_female        |
| Tube Name:       | kidney adult 11        |

  

| Population   | #Events | %Parent  | %Total  | GFP-A Mean | GFP-A %CV |
|--------------|---------|----------|---------|------------|-----------|
| GFP+         | 11      | 0.6773   | 0.1001  | 17,036     | 82.0      |
| living cells | 1,624   | 100.0000 | 14.7730 | 1,090      | 273.5     |

# BD FACSDiva 8.0

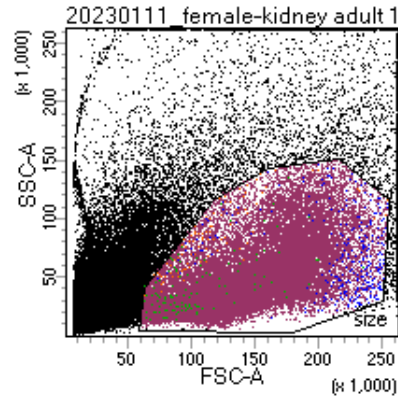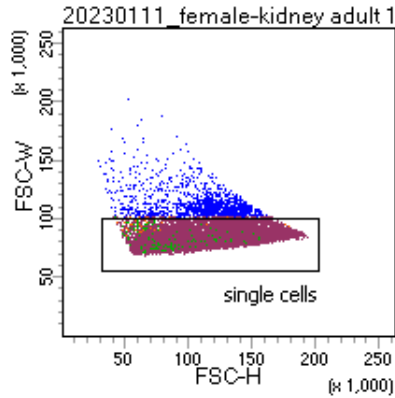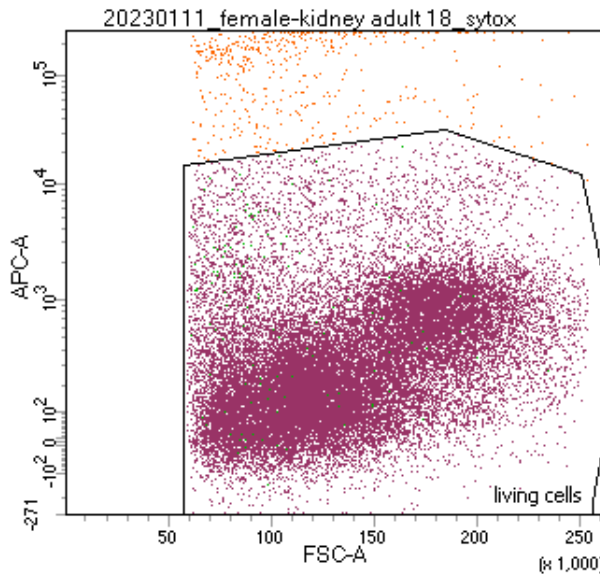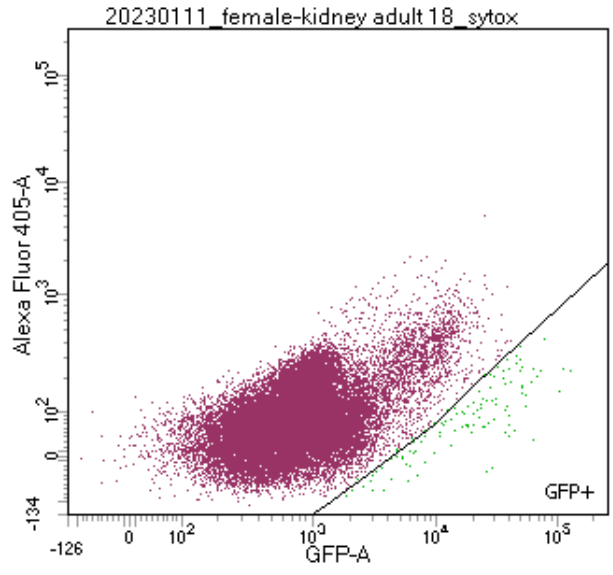

Tube: kidney adult 18\_sytox

| Population   | #Events | %Parent | %Total |
|--------------|---------|---------|--------|
| All Events   | 104,853 | ####    | 100.0  |
| size         | 32,188  | 30.7    | 30.7   |
| single cells | 30,995  | 96.3    | 29.6   |
| living cells | 30,545  | 98.5    | 29.1   |
| GFP+         | 120     | 0.4     | 0.1    |

|                  |                        |
|------------------|------------------------|
| Experiment Name: | Johannes_Notheo kidney |
| Specimen Name:   | 20230111_female        |
| Tube Name:       | kidney adult 18_sytox  |

  

| Population   | #Events | %Parent | %Total  | GFP-A Mean | GFP-A %CV |
|--------------|---------|---------|---------|------------|-----------|
| GFP+         | 120     | 0.3929  | 0.1144  | 25,140     | 94.0      |
| living cells | 30,545  | 98.5482 | 29.1313 | 1,287      | 224.1     |

# BD FACSDiva 8.0

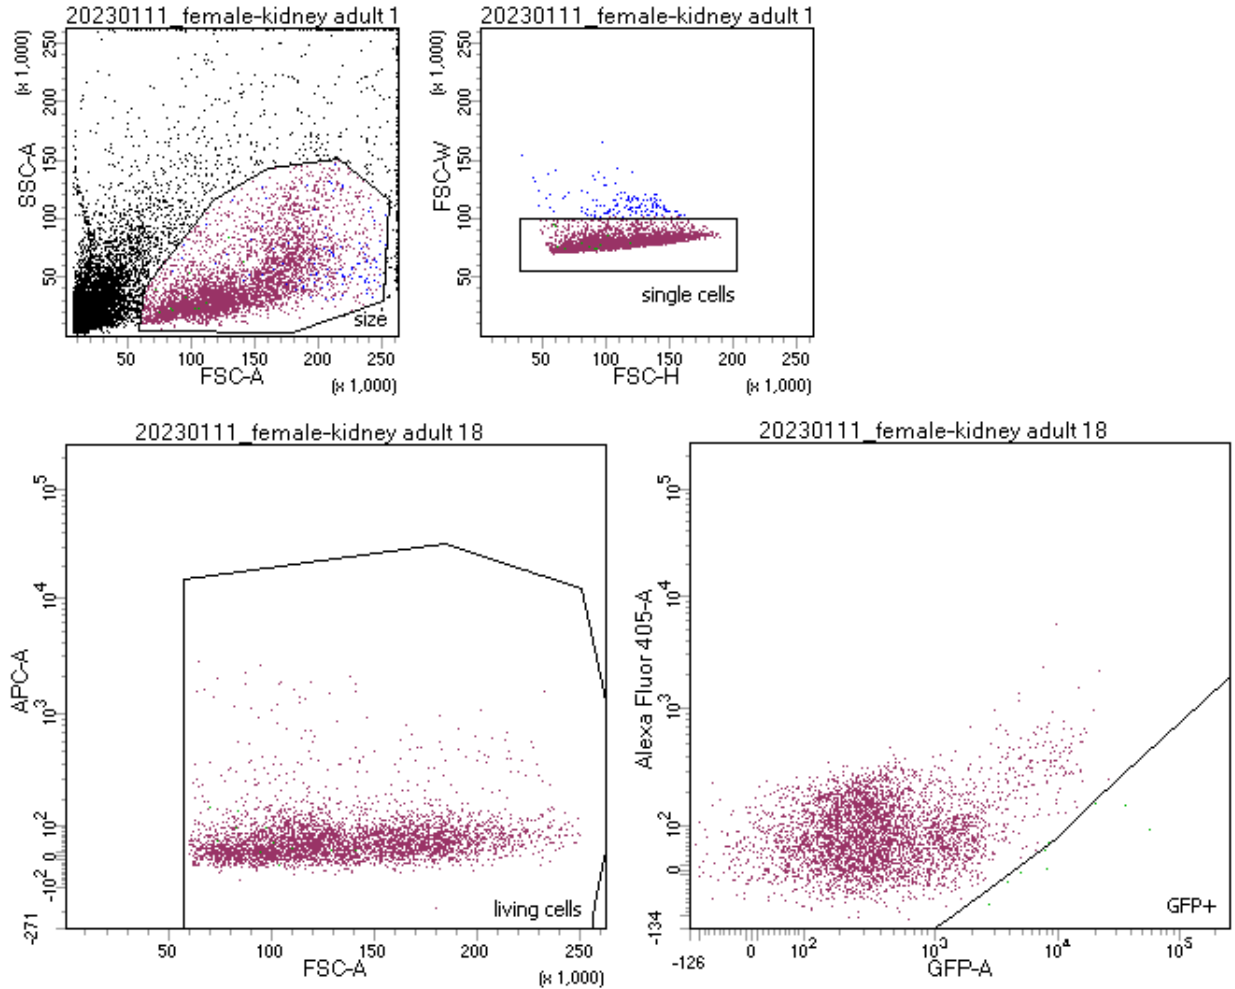

| Tube: kidney adult 18 |         |         |        |
|-----------------------|---------|---------|--------|
| Population            | #Events | %Parent | %Total |
| ■ All Events          | 14,248  | ####    | 100.0  |
| ■ size                | 4,305   | 30.2    | 30.2   |
| ■ single cells        | 4,168   | 96.8    | 29.3   |
| ■ living cells        | 4,168   | 100.0   | 29.3   |
| ■ GFP+                | 11      | 0.3     | 0.1    |

|                  |                        |
|------------------|------------------------|
| Experiment Name: | Johannes_Notheo kidney |
| Specimen Name:   | 20230111_female        |
| Tube Name:       | kidney adult 18        |

  

| Population     | #Events | %Parent  | %Total  | GFP-A Mean | GFP-A %CV |
|----------------|---------|----------|---------|------------|-----------|
| ■ GFP+         | 11      | 0.2639   | 0.0772  | 15,335     | 111.6     |
| ■ living cells | 4,168   | 100.0000 | 29.2532 | 832        | 245.8     |



# BD FACSDiva 8.0

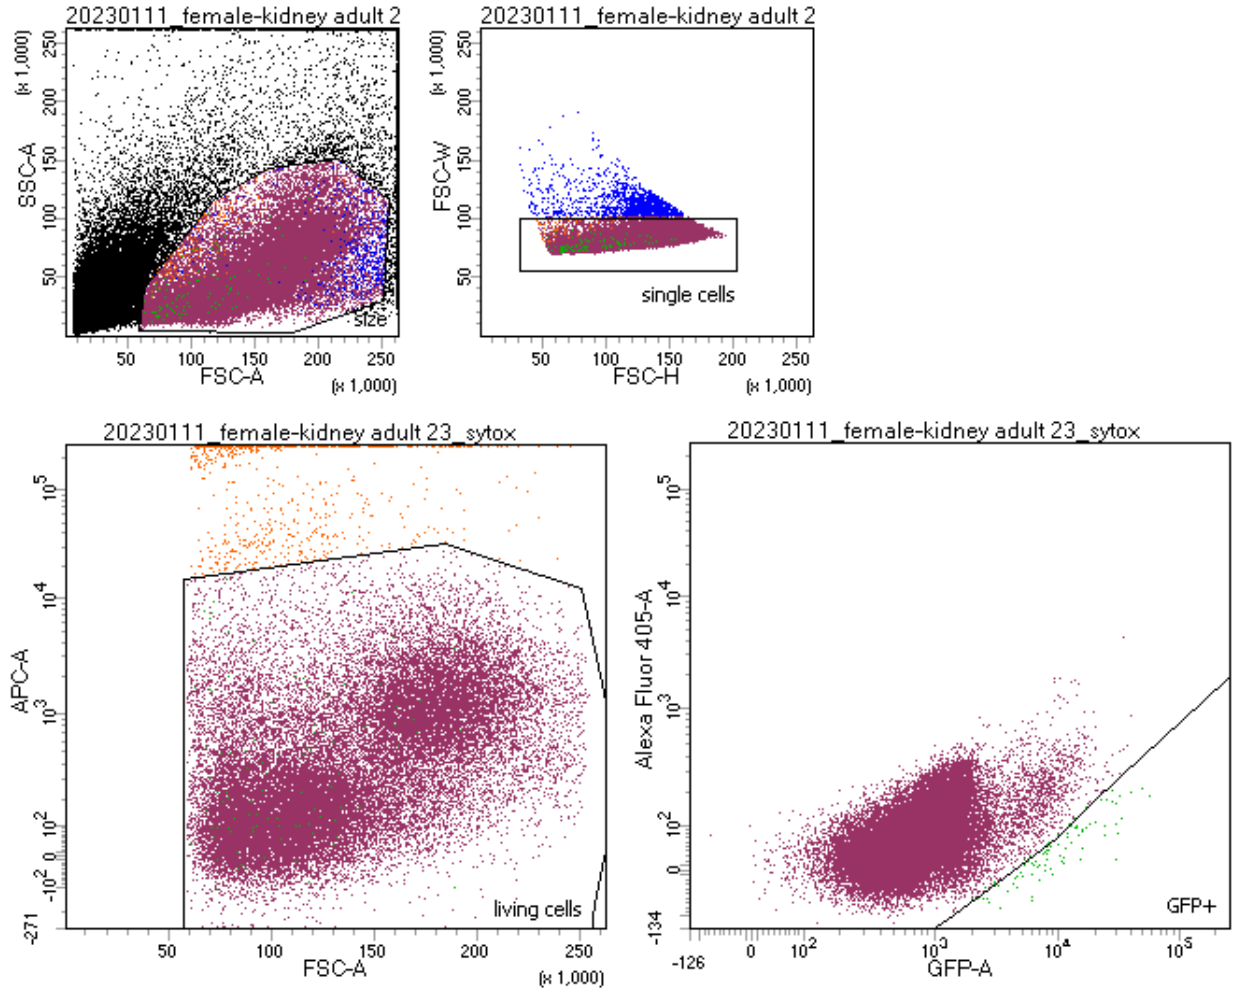

| Tube: kidney adult 23_sytox |         |         |        |
|-----------------------------|---------|---------|--------|
| Population                  | #Events | %Parent | %Total |
| ■ All Events                | 106,760 | ####    | 100.0  |
| ■ size                      | 32,970  | 30.9    | 30.9   |
| ■ single cells              | 31,440  | 95.4    | 29.4   |
| ■ living cells              | 30,744  | 97.8    | 28.8   |
| ■ GFP+                      | 93      | 0.3     | 0.1    |

|                  |                        |
|------------------|------------------------|
| Experiment Name: | Johannes_Nothro kidney |
| Specimen Name:   | 20230111_female        |
| Tube Name:       | kidney adult 23_sytox  |

  

| Population     | #Events | %Parent | %Total  | GFP-A Mean | GFP-A %CV |
|----------------|---------|---------|---------|------------|-----------|
| ■ GFP+         | 93      | 0.3025  | 0.0871  | 12,196     | 86.2      |
| ■ living cells | 30,744  | 97.7863 | 28.7973 | 1,156      | 153.7     |

# BD FACSDiva 8.0

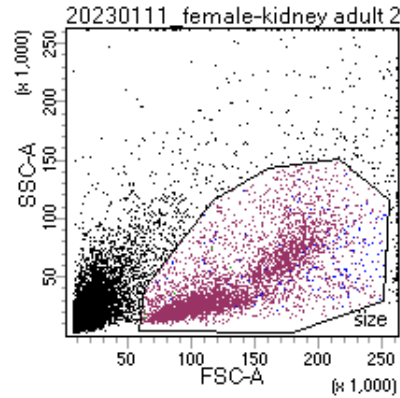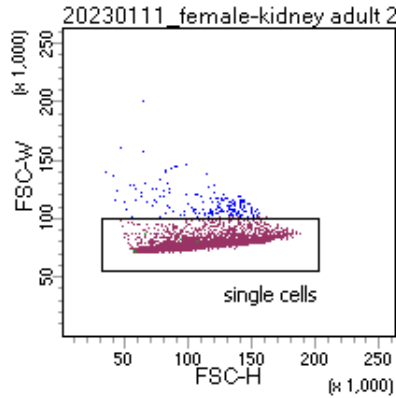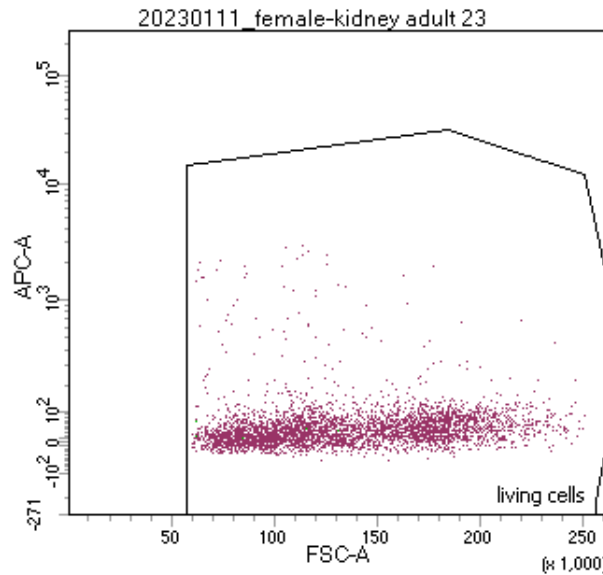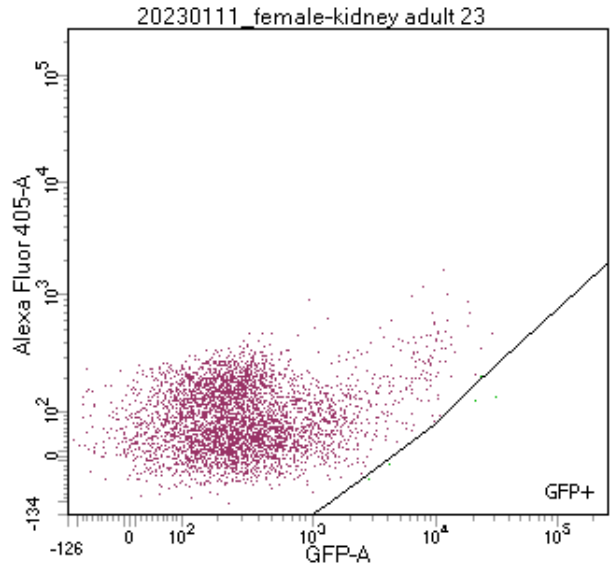

Tube: kidney adult 23

| Population     | #Events | %Parent | %Total |
|----------------|---------|---------|--------|
| ■ All Events   | 12,064  | ####    | 100.0  |
| ■ size         | 4,039   | 33.5    | 33.5   |
| ■ single cells | 3,870   | 95.8    | 32.1   |
| ■ living cells | 3,870   | 100.0   | 32.1   |
| ■ GFP+         | 5       | 0.1     | 0.0    |

|                  |                        |
|------------------|------------------------|
| Experiment Name: | Johannes_Notheo kidney |
| Specimen Name:   | 20230111_female        |
| Tube Name:       | kidney adult 23        |

  

| Population     | #Events | %Parent  | %Total  | GFP-A Mean | GFP-A %CV |
|----------------|---------|----------|---------|------------|-----------|
| ■ GFP+         | 5       | 0.1292   | 0.0414  | 16,473     | 75.9      |
| ■ living cells | 3,870   | 100.0000 | 32.0789 | 652        | 263.0     |



# BD FACSDiva 8.0

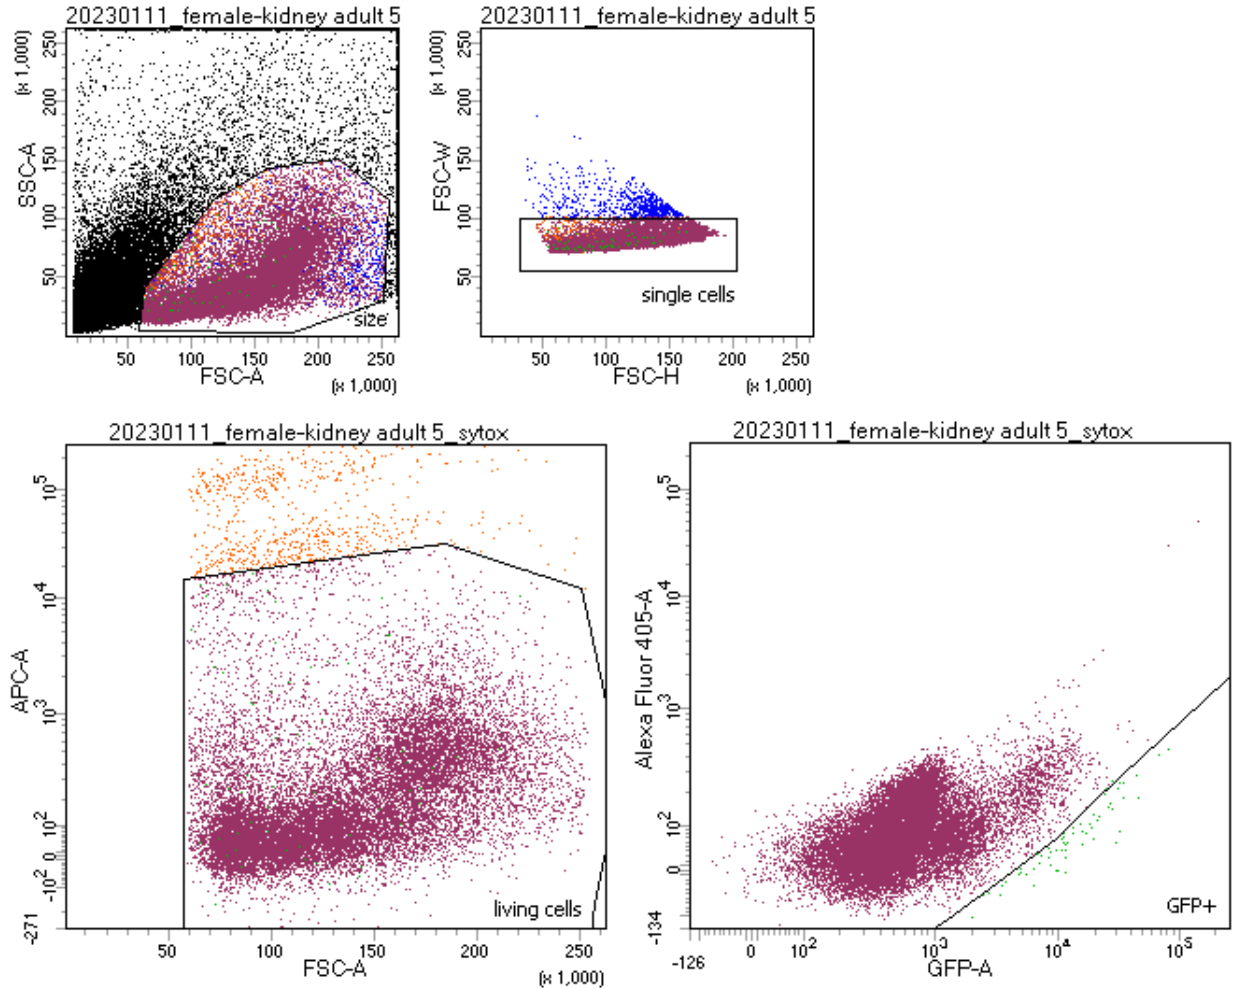

| Tube: kidney adult 5_sytox |         |         |        |
|----------------------------|---------|---------|--------|
| Population                 | #Events | %Parent | %Total |
| ■ All Events               | 74,856  | ####    | 100.0  |
| ■ size                     | 20,584  | 27.5    | 27.5   |
| ■ single cells             | 19,915  | 96.7    | 26.6   |
| ■ living cells             | 19,232  | 96.6    | 25.7   |
| ■ GFP+                     | 62      | 0.3     | 0.1    |

|                  |                        |
|------------------|------------------------|
| Experiment Name: | Johannes_Nothro kidney |
| Specimen Name:   | 20230111_female        |
| Tube Name:       | kidney adult 5_sytox   |

  

| Population     | #Events | %Parent | %Total  | GFP-A Mean | GFP-A %CV |
|----------------|---------|---------|---------|------------|-----------|
| ■ GFP+         | 62      | 0.3224  | 0.0828  | 17,532     | 86.6      |
| ■ living cells | 19,232  | 96.5704 | 25.6920 | 1,097      | 235.2     |

# BD FACSDiva 8.0

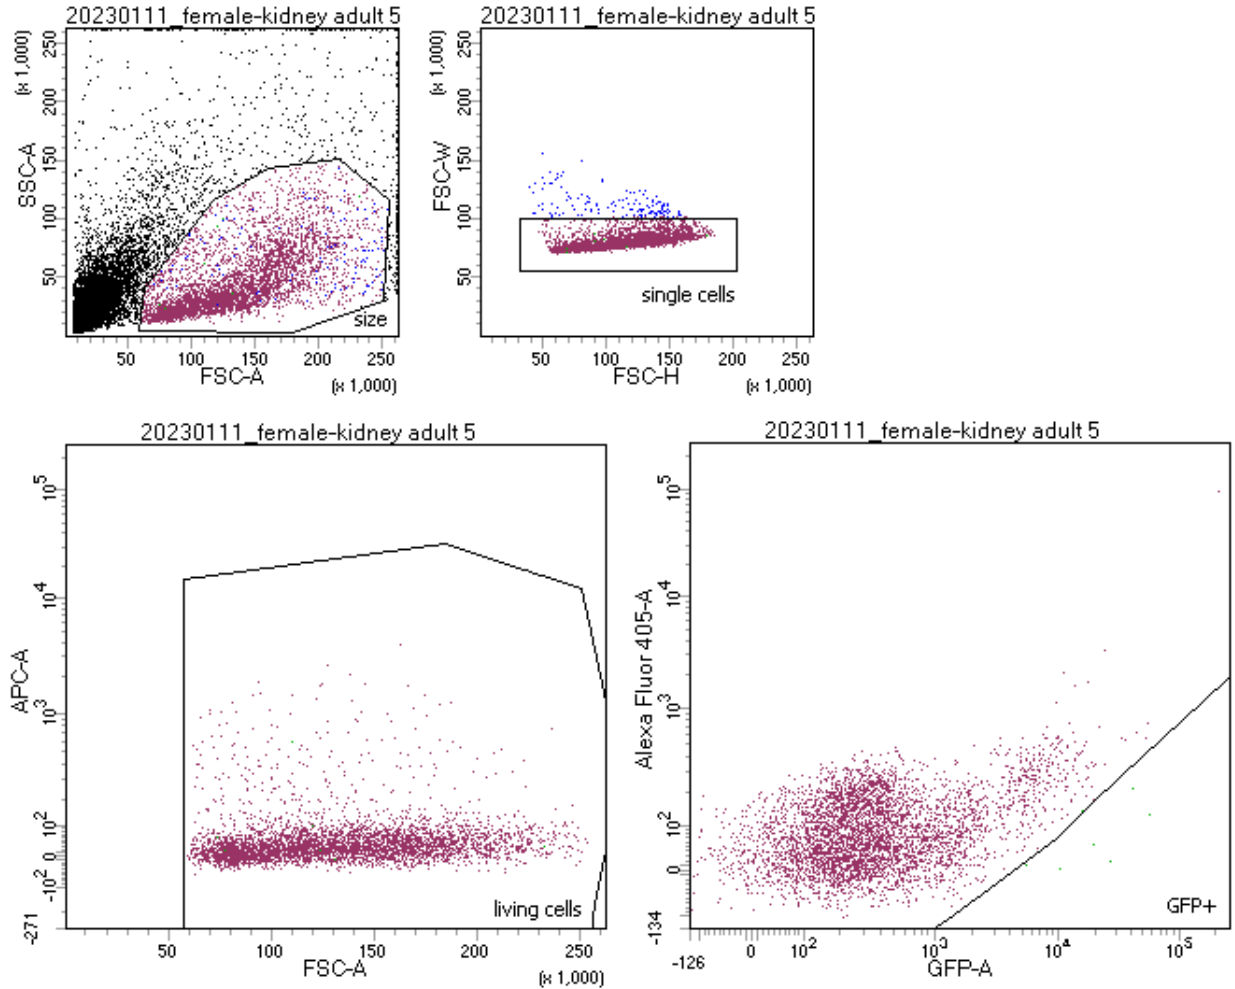

| Tube: kidney adult 5 |         |         |        |
|----------------------|---------|---------|--------|
| Population           | #Events | %Parent | %Total |
| ■ All Events         | 15,548  | ####    | 100.0  |
| ■ size               | 4,398   | 28.3    | 28.3   |
| ■ single cells       | 4,252   | 96.7    | 27.3   |
| ■ living cells       | 4,252   | 100.0   | 27.3   |
| ■ GFP+               | 7       | 0.2     | 0.0    |

|                          |                        |          |         |            |           |
|--------------------------|------------------------|----------|---------|------------|-----------|
| Experiment Name:         | Johannes_Nothro kidney |          |         |            |           |
| Specimen Name:           | 20230111_female        |          |         |            |           |
| Tube Name:               | kidney adult 5         |          |         |            |           |
| Population               | #Events                | %Parent  | %Total  | GFP-A Mean | GFP-A %CV |
| <div></div> GFP+         | 7                      | 0.1646   | 0.0450  | 25,326     | 73.4      |
| <div></div> living cells | 4,252                  | 100.0000 | 27.3476 | 1,070      | 411.2     |

# BD FACSDiva 8.0

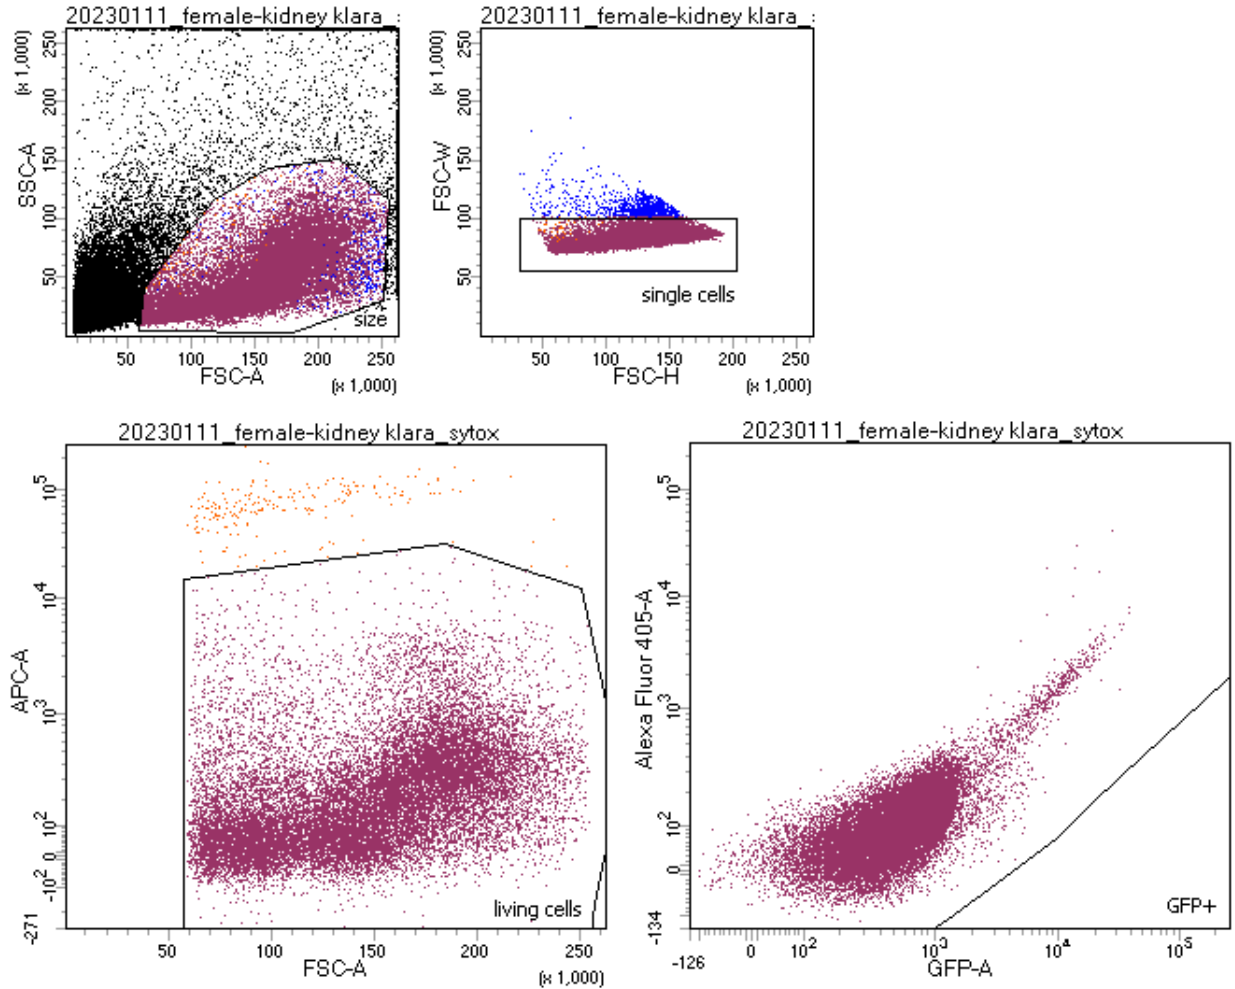

| Tube: kidney klara_sytox |         |         |        |
|--------------------------|---------|---------|--------|
| Population               | #Events | %Parent | %Total |
| ■ All Events             | 70,503  | ####    | 100.0  |
| ■ size                   | 23,023  | 32.7    | 32.7   |
| ■ single cells           | 22,117  | 96.1    | 31.4   |
| ■ living cells           | 21,910  | 99.1    | 31.1   |
| ■ GFP+                   | 0       | 0.0     | 0.0    |

|                  |                        |
|------------------|------------------------|
| Experiment Name: | Johannes_Nothro kidney |
| Specimen Name:   | 20230111_female        |
| Tube Name:       | kidney klara_sytox     |

  

| Population     | #Events | %Parent | %Total  | GFP-A Mean | GFP-A %CV |
|----------------|---------|---------|---------|------------|-----------|
| ■ GFP+         | 0       | 0.0000  | 0.0000  | ####       | ####      |
| ■ living cells | 21,910  | 99.0641 | 31.0767 | 823        | 198.7     |

# BD FACSDiva 8.0

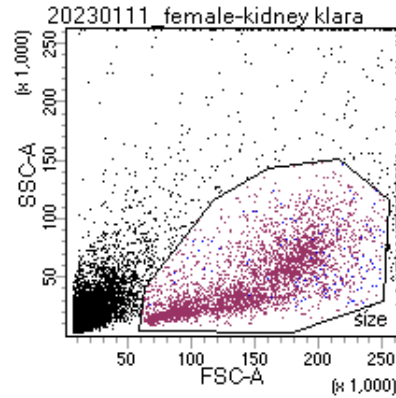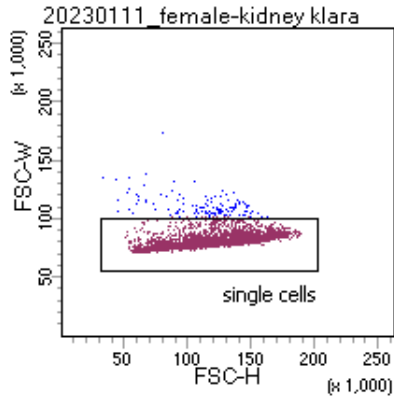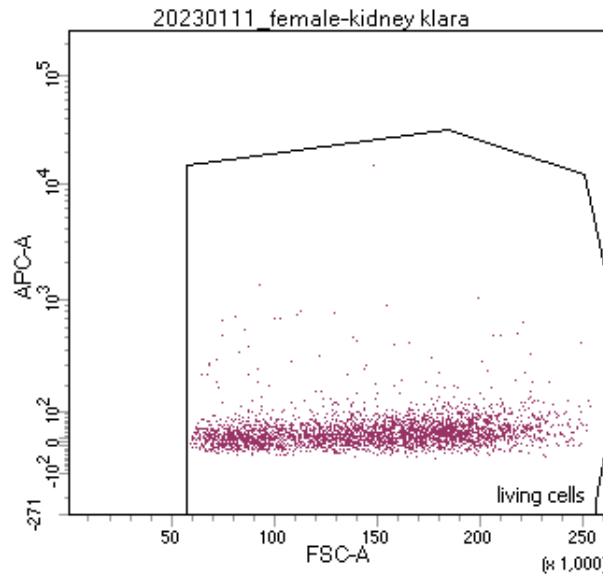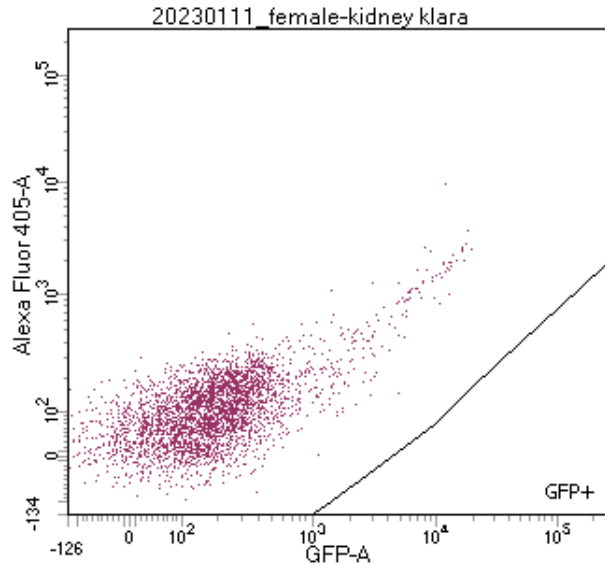

| Tube: kidney klara |         |         |        |
|--------------------|---------|---------|--------|
| Population         | #Events | %Parent | %Total |
| ■ All Events       | 10,000  | ####    | 100.0  |
| ■ size             | 3,309   | 33.1    | 33.1   |
| ■ single cells     | 3,179   | 96.1    | 31.8   |
| ■ living cells     | 3,179   | 100.0   | 31.8   |
| ■ GFP+             | 0       | 0.0     | 0.0    |

| Experiment Name: |         | Johannes_Notheo kidney |         |            |           |
|------------------|---------|------------------------|---------|------------|-----------|
| Specimen Name:   |         | 20230111_female        |         |            |           |
| Tube Name:       |         | kidney klara           |         |            |           |
| Population       | #Events | %Parent                | %Total  | GFP-A Mean | GFP-A %CV |
| ■ GFP+           | 0       | 0.0000                 | 0.0000  | ####       | ####      |
| ■ living cells   | 3,179   | 100.0000               | 31.7900 | 426        | 333.8     |

# BD FACSDiva 8.0

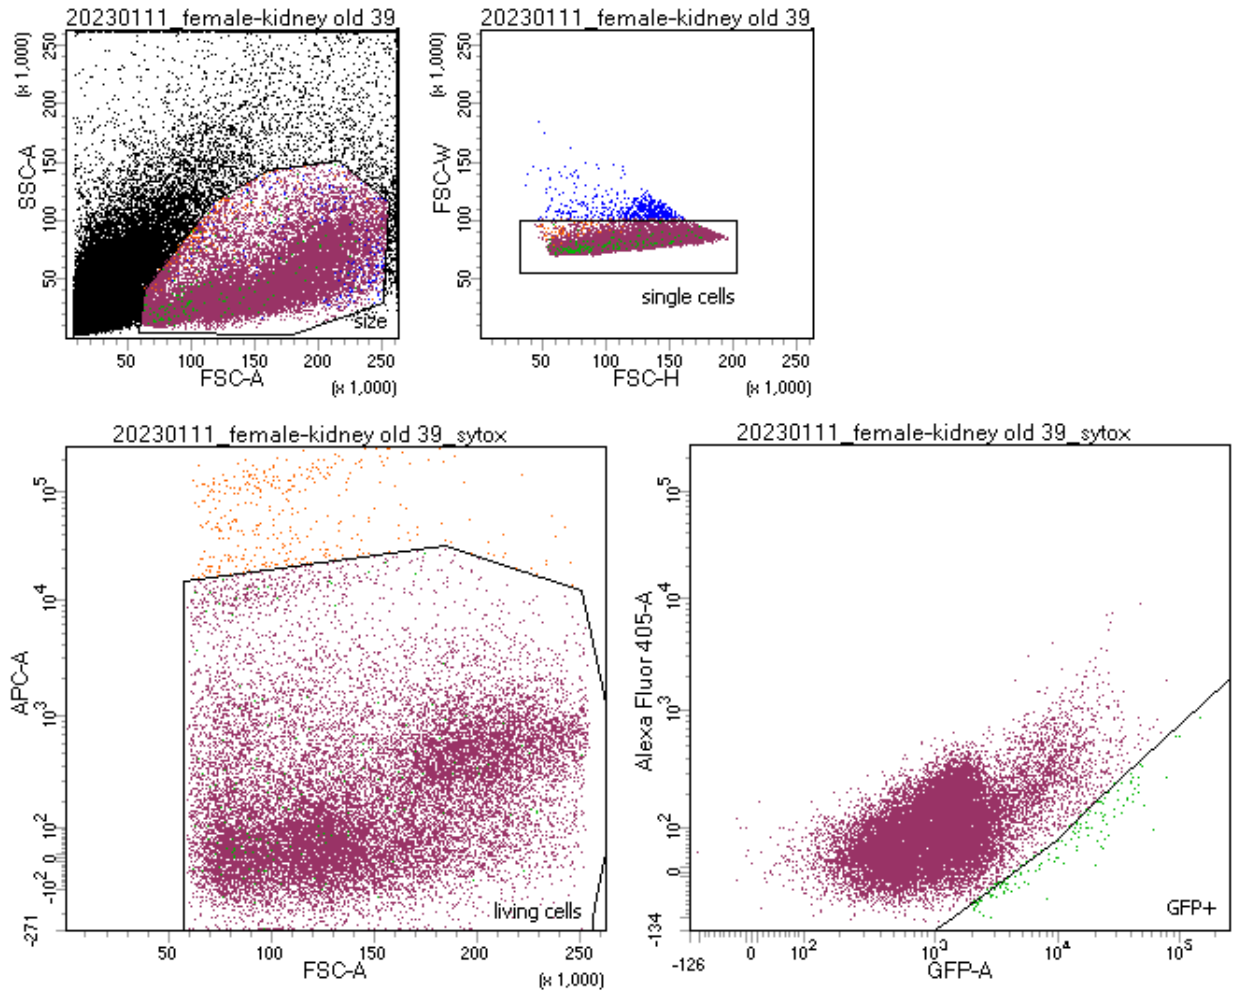

| Tube: kidney old 39_sytox |         |         |        |
|---------------------------|---------|---------|--------|
| Population                | #Events | %Parent | %Total |
| ■ All Events              | 112,169 | ####    | 100.0  |
| ■ size                    | 20,751  | 18.5    | 18.5   |
| ■ single cells            | 20,195  | 97.3    | 18.0   |
| ■ living cells            | 19,839  | 98.2    | 17.7   |
| ■ GFP+                    | 146     | 0.7     | 0.1    |

|                  |                        |
|------------------|------------------------|
| Experiment Name: | Johannes_Nothro kidney |
| Specimen Name:   | 20230111_female        |
| Tube Name:       | kidney old 39_sytox    |

  

| Population     | #Events | %Parent | %Total  | GFP-A Mean | GFP-A %CV |
|----------------|---------|---------|---------|------------|-----------|
| ■ GFP+         | 146     | 0.7359  | 0.1302  | 18,024     | 116.1     |
| ■ living cells | 19,839  | 98.2372 | 17.6867 | 1,981      | 201.9     |

# BD FACSDiva 8.0

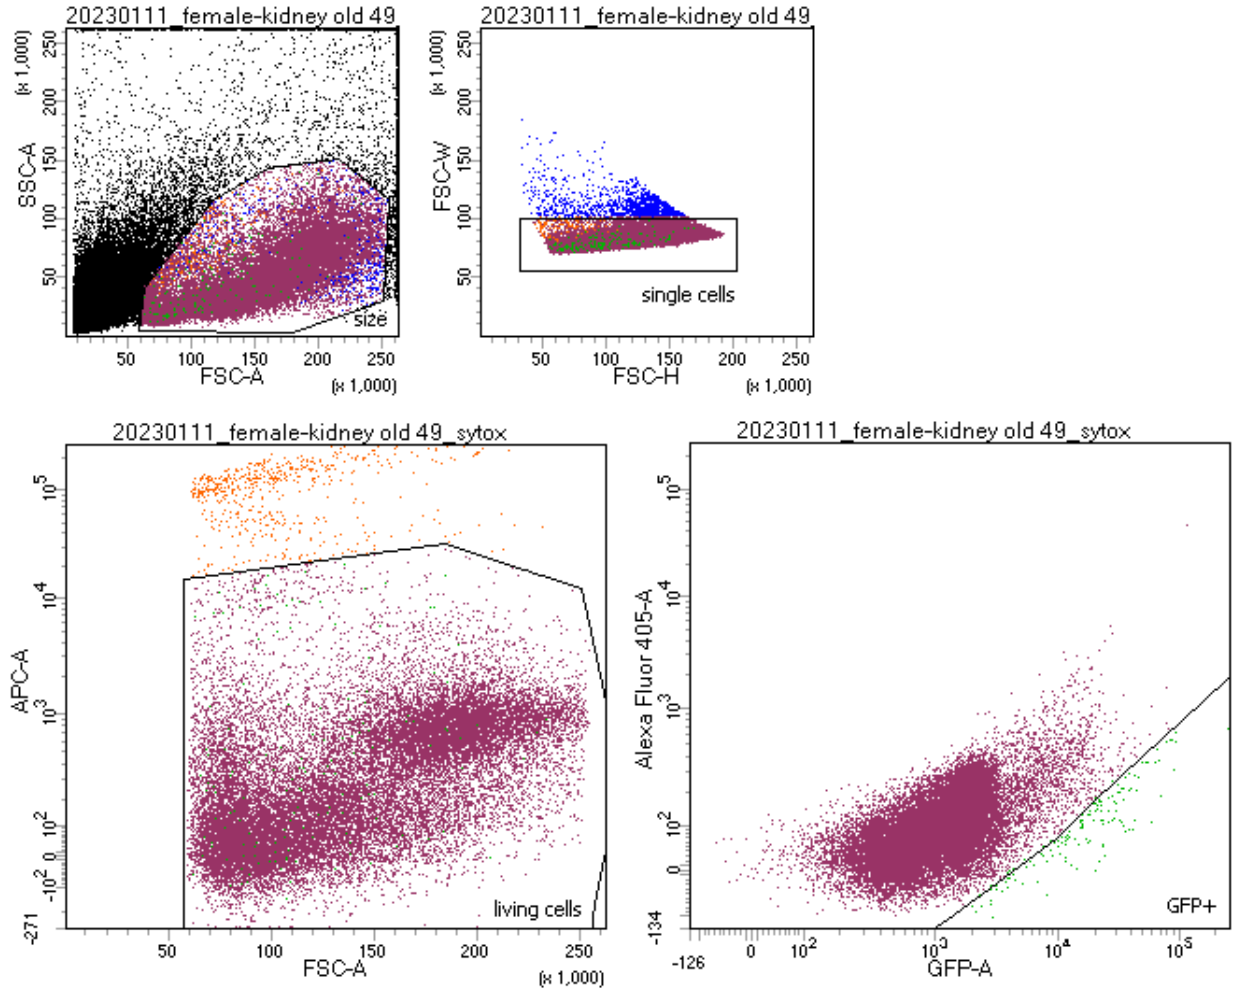

| Tube: kidney old 49_sytox |         |         |        |
|---------------------------|---------|---------|--------|
| Population                | #Events | %Parent | %Total |
| ■ All Events              | 95,664  | ####    | 100.0  |
| ■ size                    | 26,950  | 28.2    | 28.2   |
| ■ single cells            | 25,772  | 95.6    | 26.9   |
| ■ living cells            | 25,226  | 97.9    | 26.4   |
| ■ GFP+                    | 149     | 0.6     | 0.2    |

|                  |                        |
|------------------|------------------------|
| Experiment Name: | Johannes_Nothro kidney |
| Specimen Name:   | 20230111_female        |
| Tube Name:       | kidney old 49_sytox    |

  

| Population     | #Events | %Parent | %Total  | GFP-A Mean | GFP-A %CV |
|----------------|---------|---------|---------|------------|-----------|
| ■ GFP+         | 149     | 0.5907  | 0.1558  | 23,827     | 117.8     |
| ■ living cells | 25,226  | 97.8814 | 26.3694 | 1,826      | 213.8     |



# BD FACSDiva 8.0

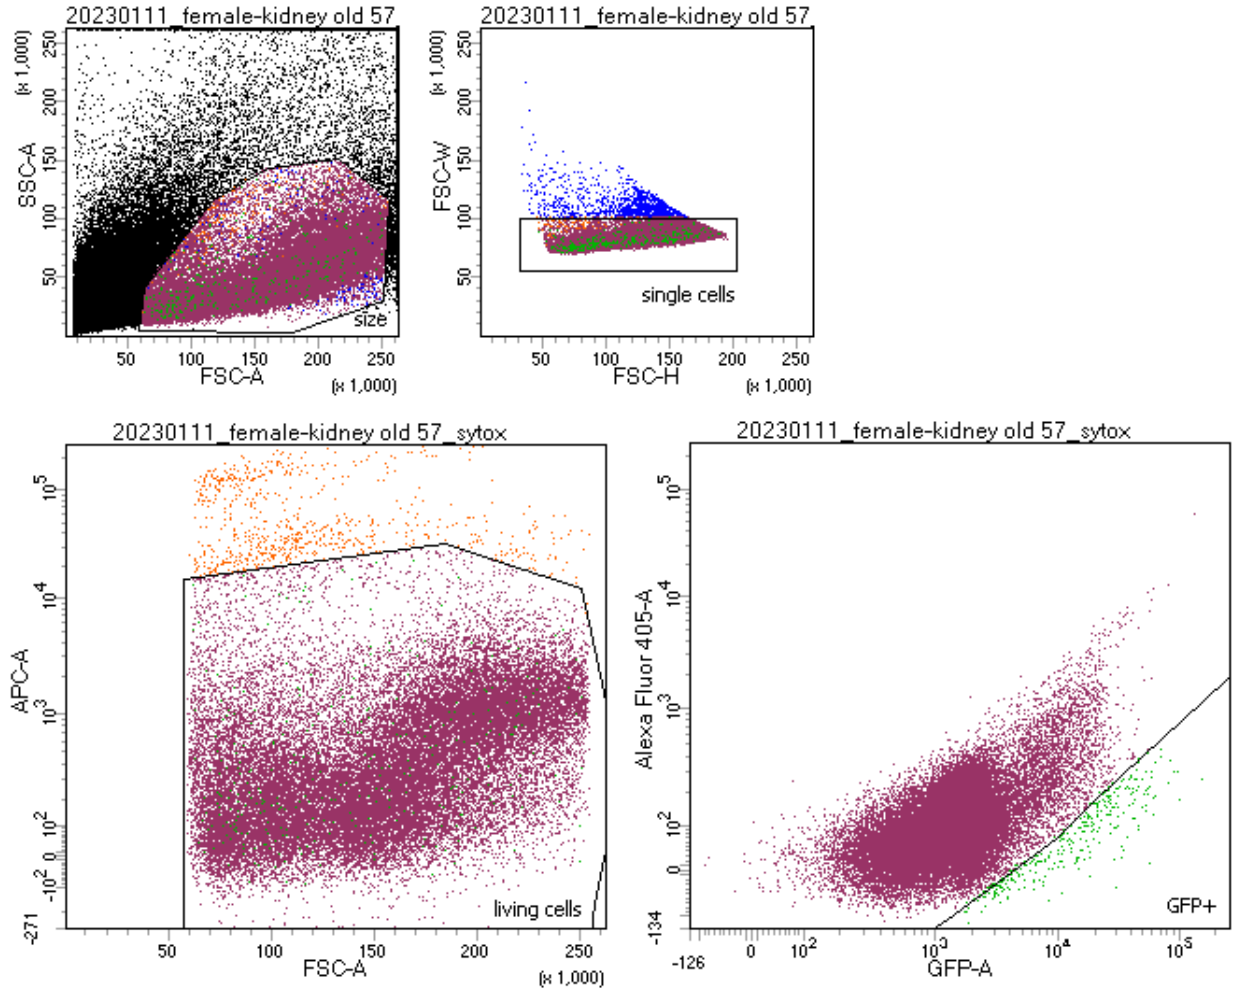

| Tube: kidney old 57_sytox |         |         |        |
|---------------------------|---------|---------|--------|
| Population                | #Events | %Parent | %Total |
| ■ All Events              | 156,800 | ####    | 100.0  |
| ■ size                    | 36,916  | 23.5    | 23.5   |
| ■ single cells            | 35,841  | 97.1    | 22.9   |
| ■ living cells            | 35,133  | 98.0    | 22.4   |
| ■ GFP+                    | 315     | 0.9     | 0.2    |

|                  |                        |
|------------------|------------------------|
| Experiment Name: | Johannes_Nothro kidney |
| Specimen Name:   | 20230111_female        |
| Tube Name:       | kidney old 57_sytox    |

  

| Population     | #Events | %Parent | %Total  | GFP-A Mean | GFP-A %CV |
|----------------|---------|---------|---------|------------|-----------|
| ■ GFP+         | 315     | 0.8966  | 0.2009  | 20,173     | 98.9      |
| ■ living cells | 35,133  | 98.0246 | 22.4063 | 2,341      | 178.0     |

# BD FACSDiva 8.0

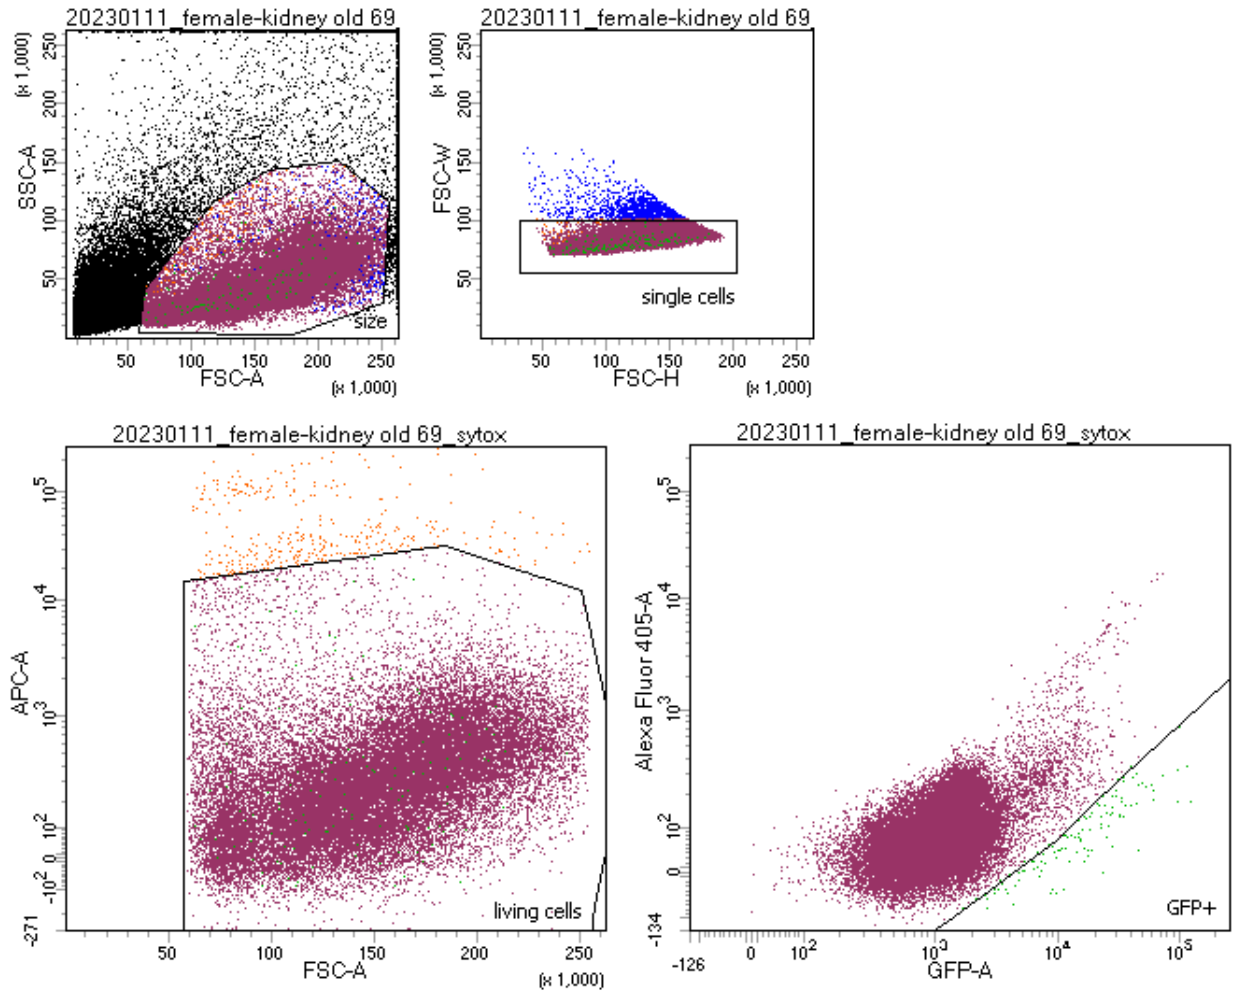

| Tube: kidney old 69_sytox |         |         |        |
|---------------------------|---------|---------|--------|
| Population                | #Events | %Parent | %Total |
| ■ All Events              | 86,908  | ####    | 100.0  |
| ■ size                    | 34,423  | 39.6    | 39.6   |
| ■ single cells            | 33,239  | 96.6    | 38.2   |
| ■ living cells            | 32,882  | 98.9    | 37.8   |
| ■ GFP+                    | 128     | 0.4     | 0.1    |

|                  |                        |
|------------------|------------------------|
| Experiment Name: | Johannes_Nothro kidney |
| Specimen Name:   | 20230111_female        |
| Tube Name:       | kidney old 69_sytox    |

  

| Population     | #Events | %Parent | %Total  | GFP-A Mean | GFP-A %CV |
|----------------|---------|---------|---------|------------|-----------|
| ■ GFP+         | 128     | 0.3893  | 0.1473  | 21,833     | 107.6     |
| ■ living cells | 32,882  | 98.9260 | 37.8354 | 1,603      | 184.4     |

# BD FACSDiva 8.0

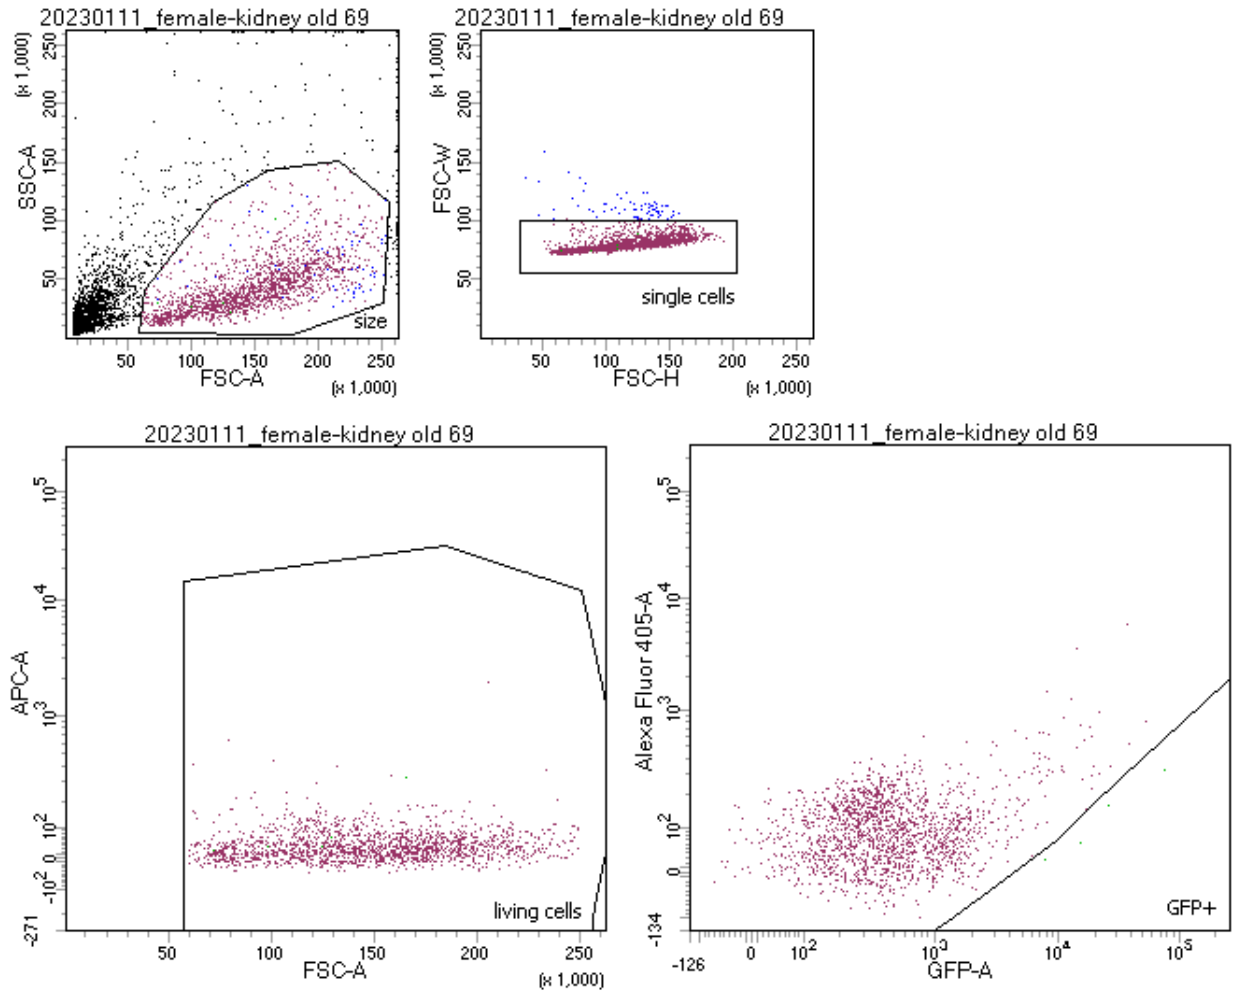

| Tube: kidney old 69 |         |         |        |
|---------------------|---------|---------|--------|
| Population          | #Events | %Parent | %Total |
| ■ All Events        | 4,108   | ####    | 100.0  |
| ■ size              | 1,731   | 42.1    | 42.1   |
| ■ single cells      | 1,659   | 95.8    | 40.4   |
| ■ living cells      | 1,659   | 100.0   | 40.4   |
| ■ GFP+              | 5       | 0.3     | 0.1    |

|                  |                        |
|------------------|------------------------|
| Experiment Name: | Johannes_Nothro kidney |
| Specimen Name:   | 20230111_female        |
| Tube Name:       | kidney old 69          |

  

| Population     | #Events | %Parent  | %Total  | GFP-A Mean | GFP-A %CV |
|----------------|---------|----------|---------|------------|-----------|
| ■ GFP+         | 5       | 0.3014   | 0.1217  | 26,142     | 116.1     |
| ■ living cells | 1,659   | 100.0000 | 40.3846 | 1,062      | 320.2     |

# BD FACSDiva 8.0

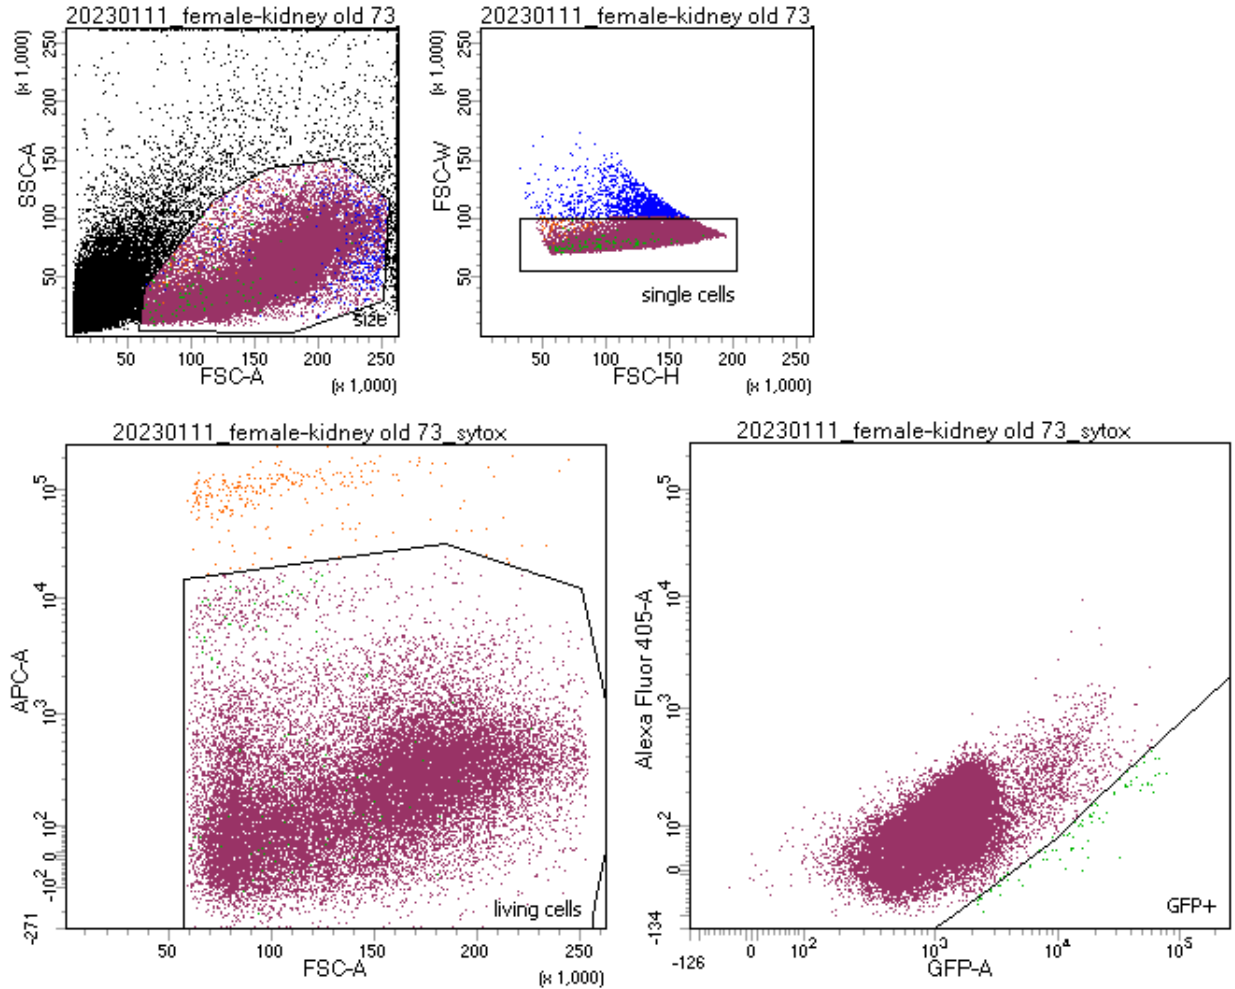

| Tube: kidney old 73_sytox |         |         |        |
|---------------------------|---------|---------|--------|
| Population                | #Events | %Parent | %Total |
| ■ All Events              | 69,285  | ####    | 100.0  |
| ■ size                    | 28,433  | 41.0    | 41.0   |
| ■ single cells            | 27,175  | 95.6    | 39.2   |
| ■ living cells            | 26,914  | 99.0    | 38.8   |
| ■ GFP+                    | 92      | 0.3     | 0.1    |

| Experiment Name: |         | Johannes_Notheo kidney |         |            |           |
|------------------|---------|------------------------|---------|------------|-----------|
| Specimen Name:   |         | 20230111_female        |         |            |           |
| Tube Name:       |         | kidney old 73_sytox    |         |            |           |
| Population       | #Events | %Parent                | %Total  | GFP-A Mean | GFP-A %CV |
| ■ GFP+           | 92      | 0.3418                 | 0.1328  | 22,272     | 91.7      |
| ■ living cells   | 26,914  | 99.0396                | 38.8453 | 1,751      | 169.7     |

# BD FACSDiva 8.0

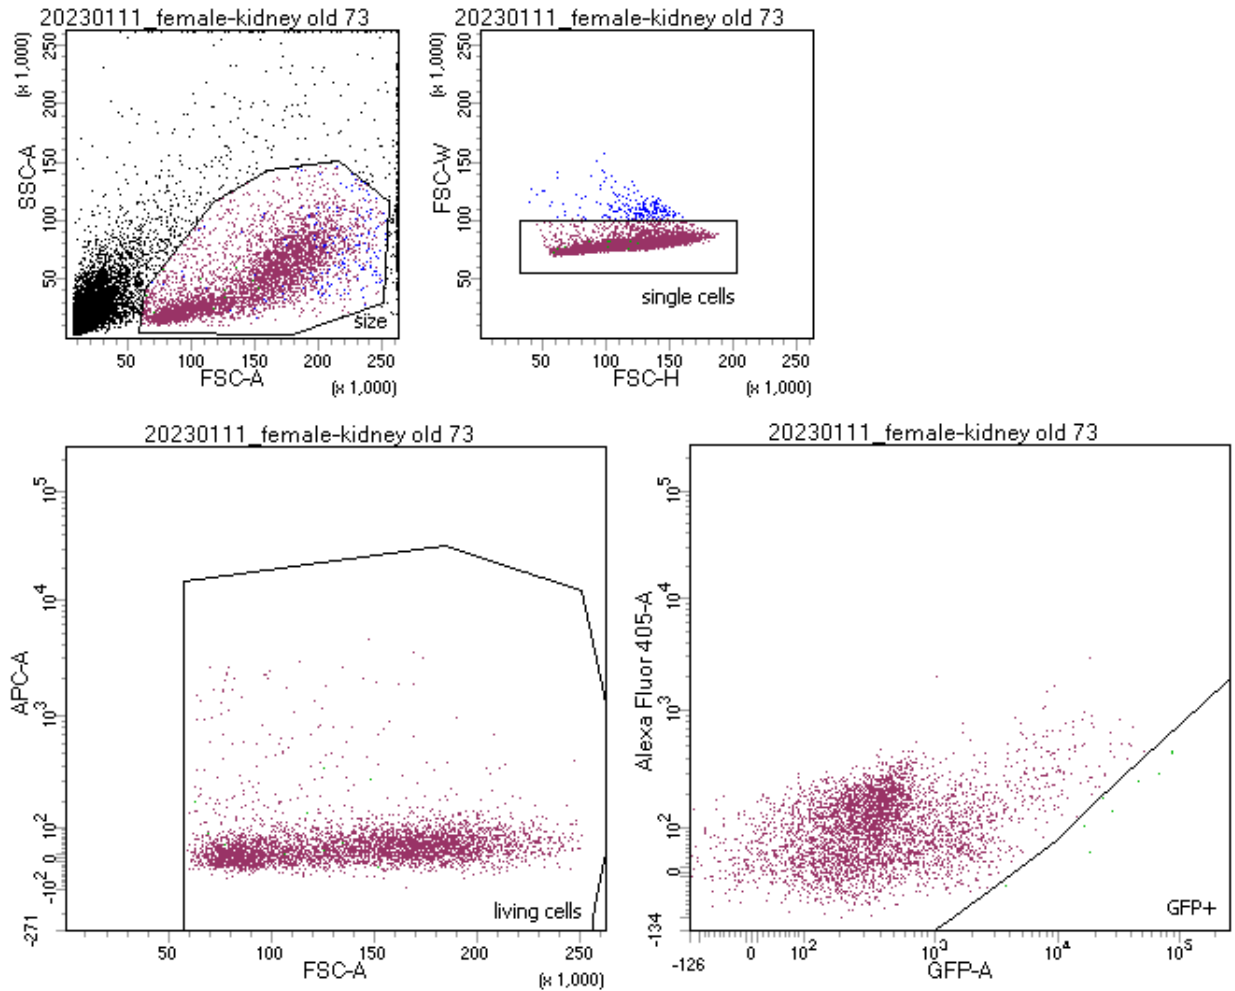

| Tube: kidney old 73 |         |         |        |
|---------------------|---------|---------|--------|
| Population          | #Events | %Parent | %Total |
| ■ All Events        | 11,336  | ####    | 100.0  |
| ■ size              | 4,471   | 39.4    | 39.4   |
| ■ single cells      | 4,257   | 95.2    | 37.6   |
| ■ living cells      | 4,257   | 100.0   | 37.6   |
| ■ GFP+              | 10      | 0.2     | 0.1    |

|                  |                        |
|------------------|------------------------|
| Experiment Name: | Johannes_Notheo kidney |
| Specimen Name:   | 20230111_female        |
| Tube Name:       | kidney old 73          |

  

| Population     | #Events | %Parent  | %Total  | GFP-A Mean | GFP-A %CV |
|----------------|---------|----------|---------|------------|-----------|
| ■ GFP+         | 10      | 0.2349   | 0.0882  | 40,692     | 75.8      |
| ■ living cells | 4,257   | 100.0000 | 37.5529 | 987        | 356.0     |

# BD FACSDiva 8.0

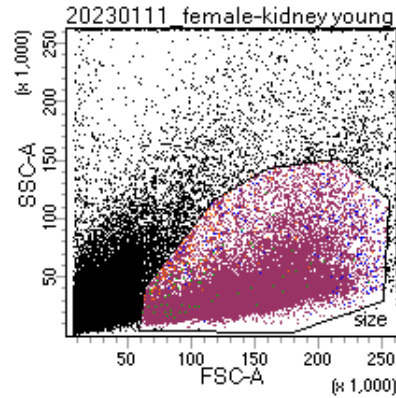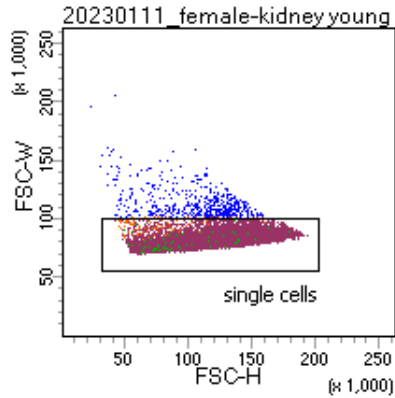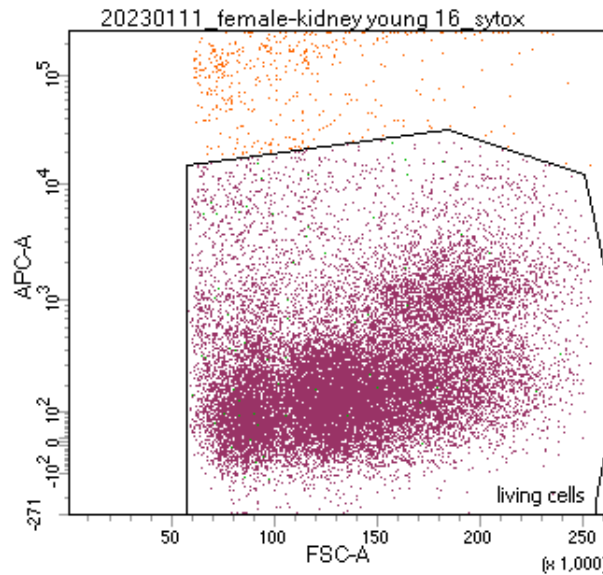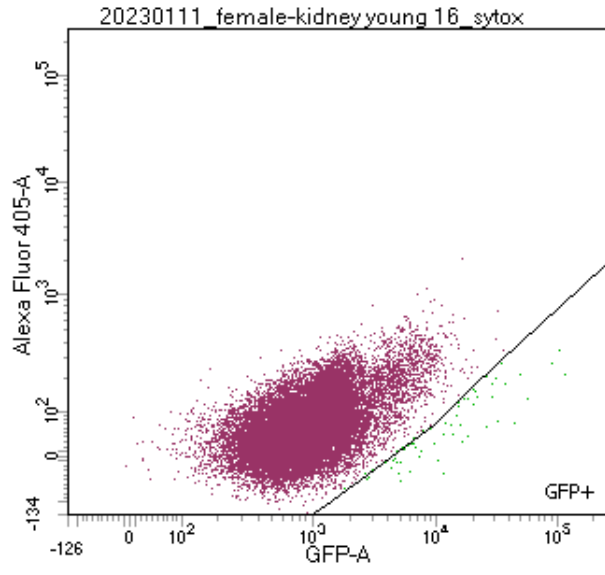

Tube: kidney young 16\_sytox

| Population     | #Events | %Parent | %Total |
|----------------|---------|---------|--------|
| ■ All Events   | 69,255  | ####    | 100.0  |
| ■ size         | 24,195  | 34.9    | 34.9   |
| ■ single cells | 23,702  | 98.0    | 34.2   |
| ■ living cells | 23,276  | 98.2    | 33.6   |
| ■ GFP+         | 63      | 0.3     | 0.1    |

|                  |                        |
|------------------|------------------------|
| Experiment Name: | Johannes_Notheo kidney |
| Specimen Name:   | 20230111_female        |
| Tube Name:       | kidney young 16_sytox  |

  

| Population     | #Events | %Parent | %Total  | GFP-A Mean | GFP-A %CV |
|----------------|---------|---------|---------|------------|-----------|
| ■ GFP+         | 63      | 0.2707  | 0.0910  | 19,256     | 121.5     |
| ■ living cells | 23,276  | 98.2027 | 33.6091 | 1,258      | 162.3     |



# BD FACSDiva 8.0

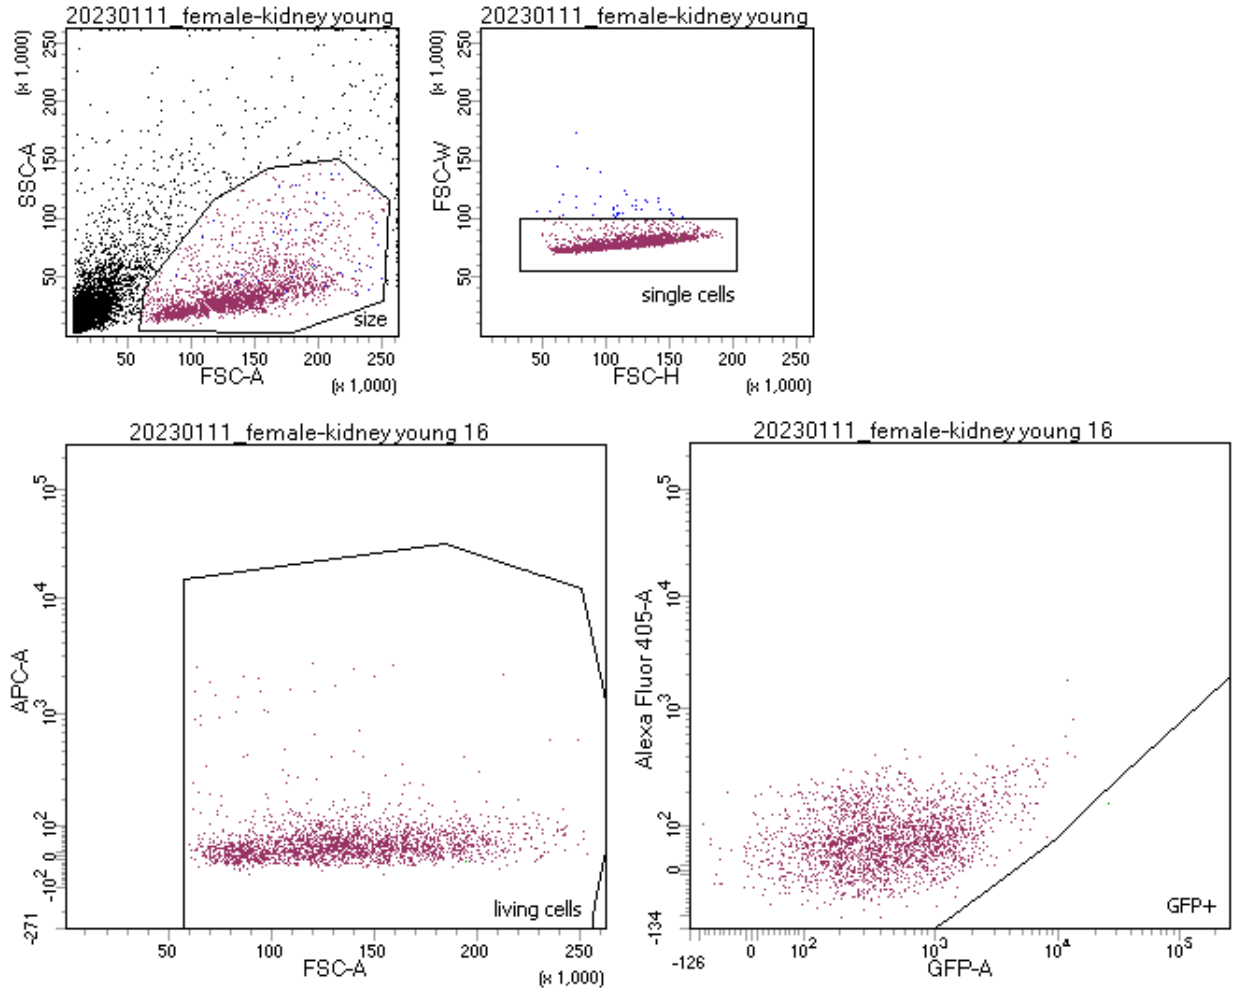

| Tube: kidney young 16 |         |         |        |
|-----------------------|---------|---------|--------|
| Population            | #Events | %Parent | %Total |
| ■ All Events          | 6,508   | ####    | 100.0  |
| ■ size                | 2,272   | 34.9    | 34.9   |
| ■ single cells        | 2,233   | 98.3    | 34.3   |
| ■ living cells        | 2,233   | 100.0   | 34.3   |
| ■ GFP+                | 1       | 0.0     | 0.0    |

|                  |                        |
|------------------|------------------------|
| Experiment Name: | Johannes_Notheo kidney |
| Specimen Name:   | 20230111_female        |
| Tube Name:       | kidney young 16        |

  

| Population     | #Events | %Parent  | %Total  | GFP-A Mean | GFP-A %CV |
|----------------|---------|----------|---------|------------|-----------|
| ■ GFP+         | 1       | 0.0448   | 0.0154  | 26,114     | ####      |
| ■ living cells | 2,233   | 100.0000 | 34.3116 | 765        | 160.2     |

# BD FACSDiva 8.0

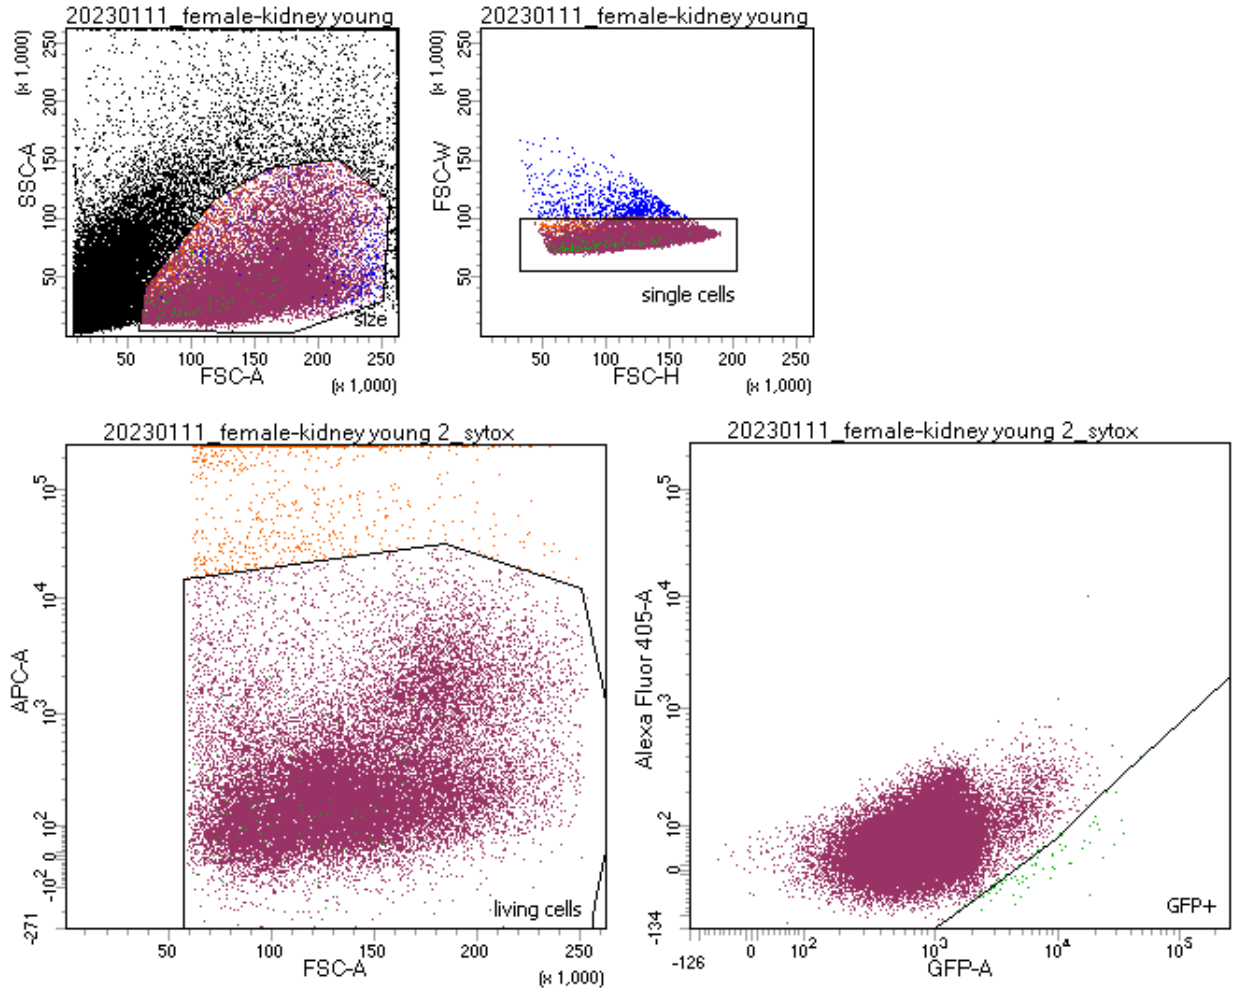

| Tube: kidney young 2_sytox |         |         |        |
|----------------------------|---------|---------|--------|
| Population                 | #Events | %Parent | %Total |
| ■ All Events               | 107,451 | ####    | 100.0  |
| ■ size                     | 30,202  | 28.1    | 28.1   |
| ■ single cells             | 29,355  | 97.2    | 27.3   |
| ■ living cells             | 28,516  | 97.1    | 26.5   |
| ■ GFP+                     | 81      | 0.3     | 0.1    |

| Experiment Name: |         | Johannes_Nothro kidney |         |            |           |
|------------------|---------|------------------------|---------|------------|-----------|
| Specimen Name:   |         | 20230111_female        |         |            |           |
| Tube Name:       |         | kidney young 2_sytox   |         |            |           |
| Population       | #Events | %Parent                | %Total  | GFP-A Mean | GFP-A %CV |
| ■ GFP+           | 81      | 0.2841                 | 0.0754  | 9,139      | 98.3      |
| ■ living cells   | 28,516  | 97.1419                | 26.5386 | 1,078      | 127.4     |

# BD FACSDiva 8.0

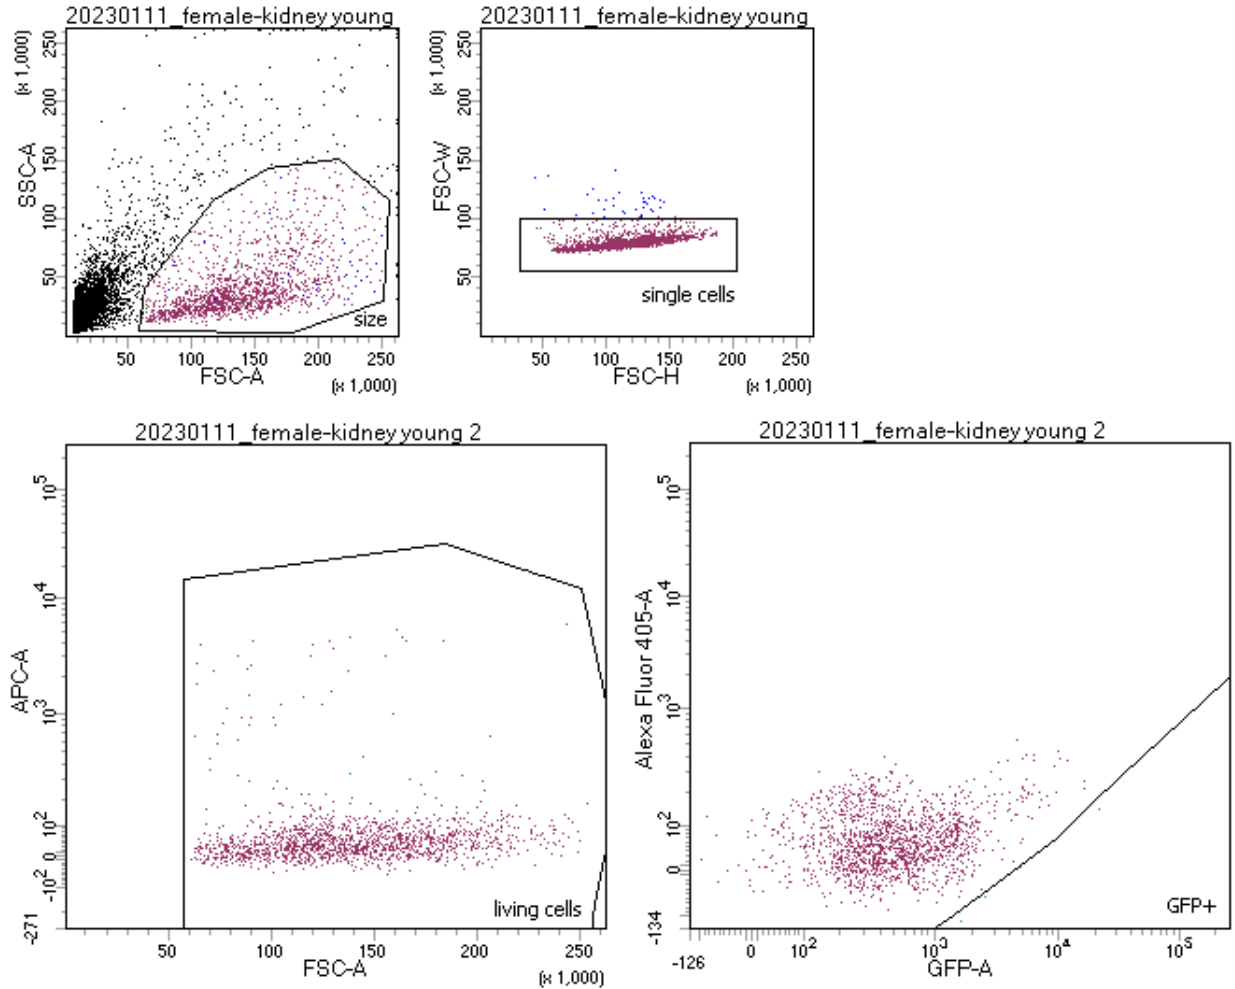

| Tube: kidney young 2 |         |         |        |
|----------------------|---------|---------|--------|
| Population           | #Events | %Parent | %Total |
| ■ All Events         | 5,158   | ####    | 100.0  |
| ■ size               | 1,554   | 30.1    | 30.1   |
| ■ single cells       | 1,518   | 97.7    | 29.4   |
| ■ living cells       | 1,518   | 100.0   | 29.4   |
| ■ GFP+               | 4       | 0.3     | 0.1    |

|                  |                        |
|------------------|------------------------|
| Experiment Name: | Johannes_Nothro kidney |
| Specimen Name:   | 20230111_female        |
| Tube Name:       | kidney young 2         |

  

| Population     | #Events | %Parent  | %Total  | GFP-A Mean | GFP-A %CV |
|----------------|---------|----------|---------|------------|-----------|
| ■ GFP+         | 4       | 0.2635   | 0.0775  | 7,709      | 124.2     |
| ■ living cells | 1,518   | 100.0000 | 29.4300 | 819        | 163.0     |

# BD FACSDiva 8.0

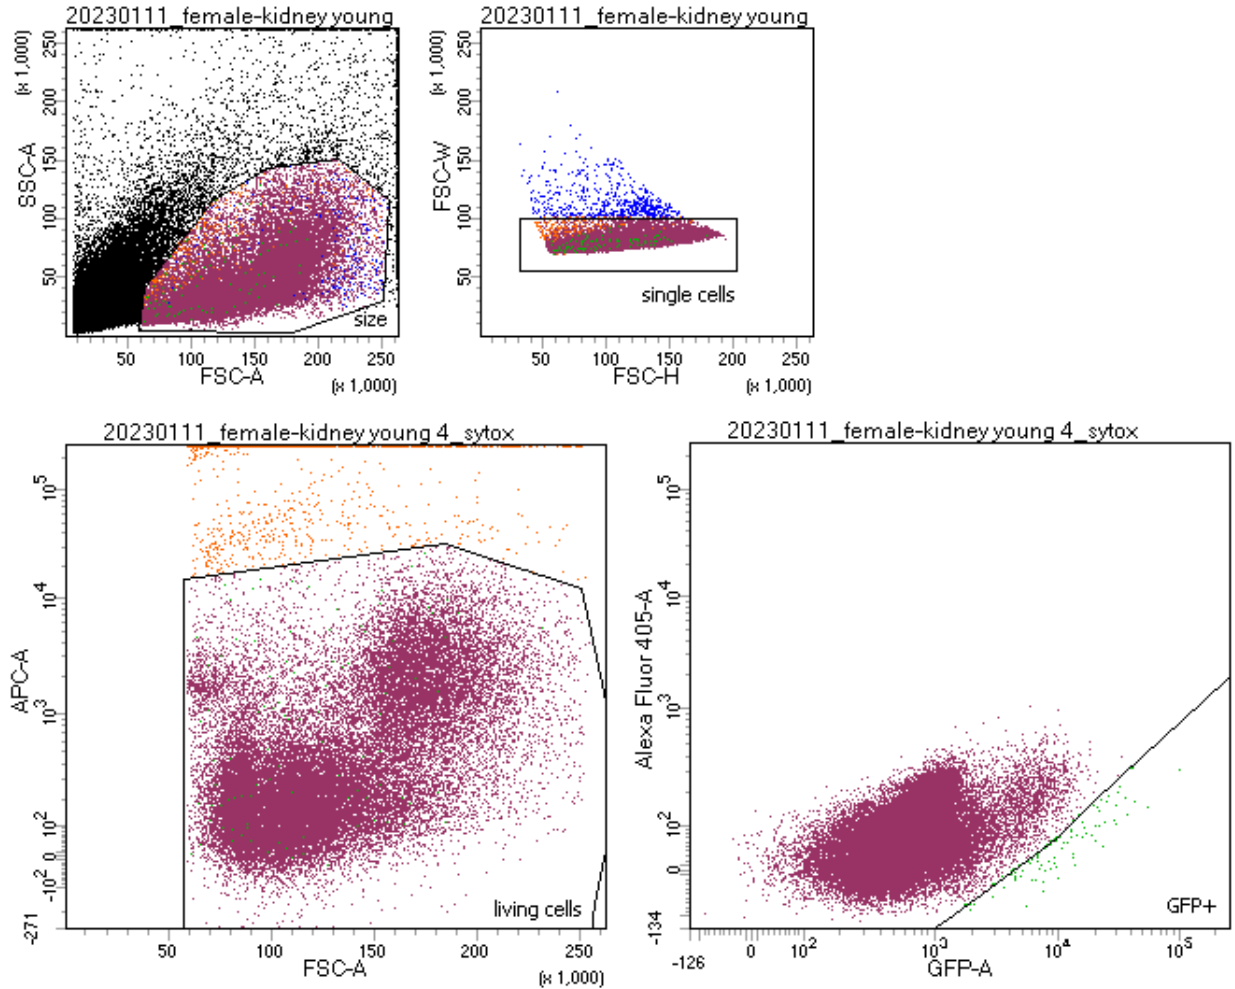

| Tube: kidney young 4_sytox |         |         |        |
|----------------------------|---------|---------|--------|
| Population                 | #Events | %Parent | %Total |
| ■ All Events               | 101,628 | ####    | 100.0  |
| ■ size                     | 36,000  | 35.4    | 35.4   |
| ■ single cells             | 35,400  | 98.3    | 34.8   |
| ■ living cells             | 34,207  | 96.6    | 33.7   |
| ■ GFP+                     | 97      | 0.3     | 0.1    |

| Experiment Name: |         | Johannes_Nothro kidney |         |            |           |
|------------------|---------|------------------------|---------|------------|-----------|
| Specimen Name:   |         | 20230111_female        |         |            |           |
| Tube Name:       |         | kidney young 4_sytox   |         |            |           |
| Population       | #Events | %Parent                | %Total  | GFP-A Mean | GFP-A %CV |
| ■ GFP+           | 97      | 0.2836                 | 0.0954  | 13,818     | 100.8     |
| ■ living cells   | 34,207  | 96.6299                | 33.6590 | 985        | 168.6     |

# BD FACSDiva 8.0

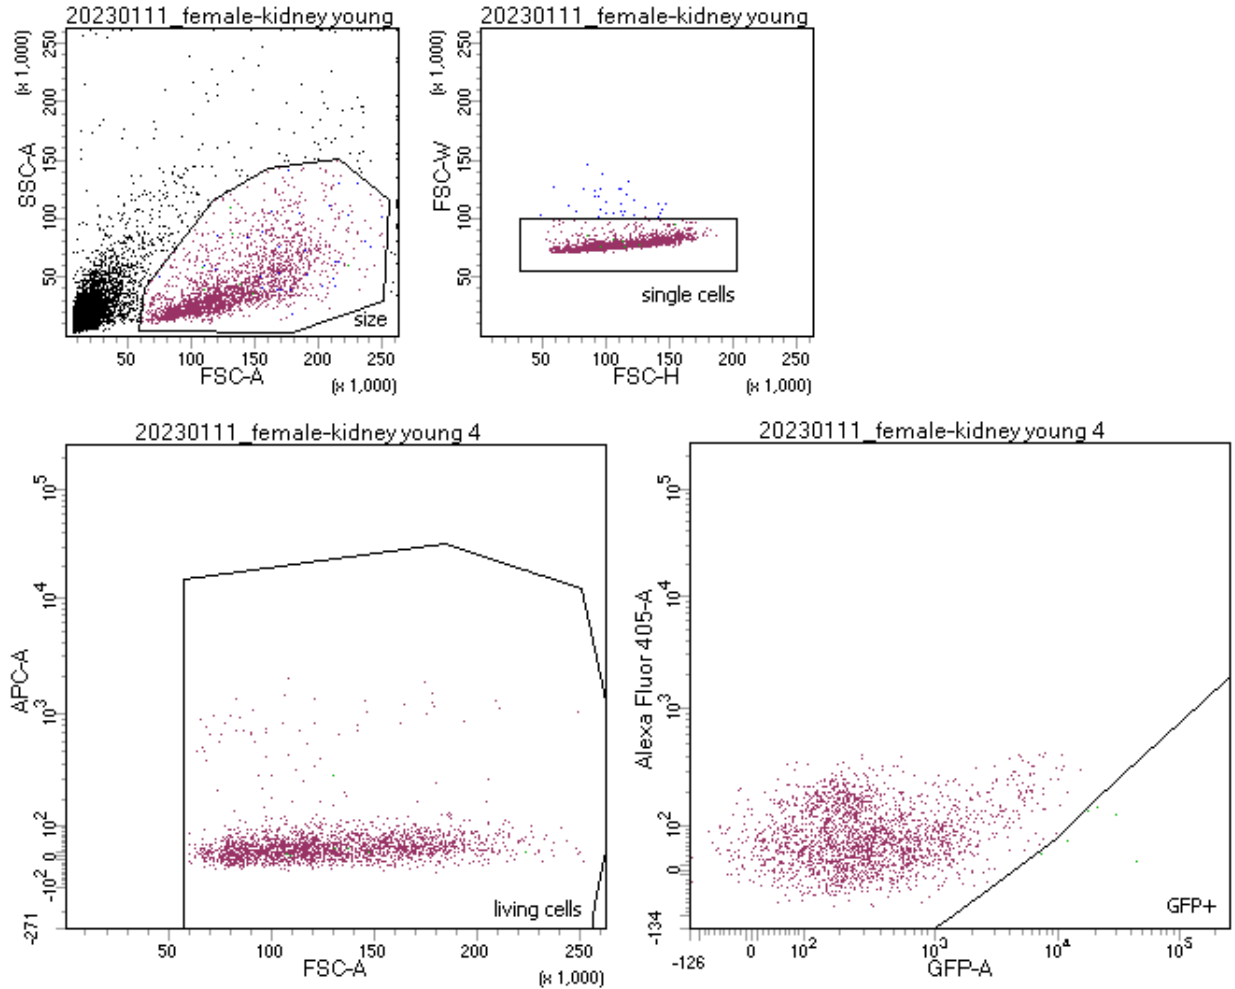

| Tube: kidney young 4 |         |         |        |
|----------------------|---------|---------|--------|
| Population           | #Events | %Parent | %Total |
| ■ All Events         | 5,980   | ####    | 100.0  |
| ■ size               | 2,215   | 37.0    | 37.0   |
| ■ single cells       | 2,182   | 98.5    | 36.5   |
| ■ living cells       | 2,182   | 100.0   | 36.5   |
| ■ GFP+               | 7       | 0.3     | 0.1    |

|                  |                        |
|------------------|------------------------|
| Experiment Name: | Johannes_Nothro kidney |
| Specimen Name:   | 20230111_female        |
| Tube Name:       | kidney young 4         |

  

| Population     | #Events | %Parent  | %Total  | GFP-A Mean | GFP-A %CV |
|----------------|---------|----------|---------|------------|-----------|
| ■ GFP+         | 7       | 0.3208   | 0.1171  | 23,269     | 55.4      |
| ■ living cells | 2,182   | 100.0000 | 36.4883 | 706        | 268.6     |

# BD FACSDiva 8.0

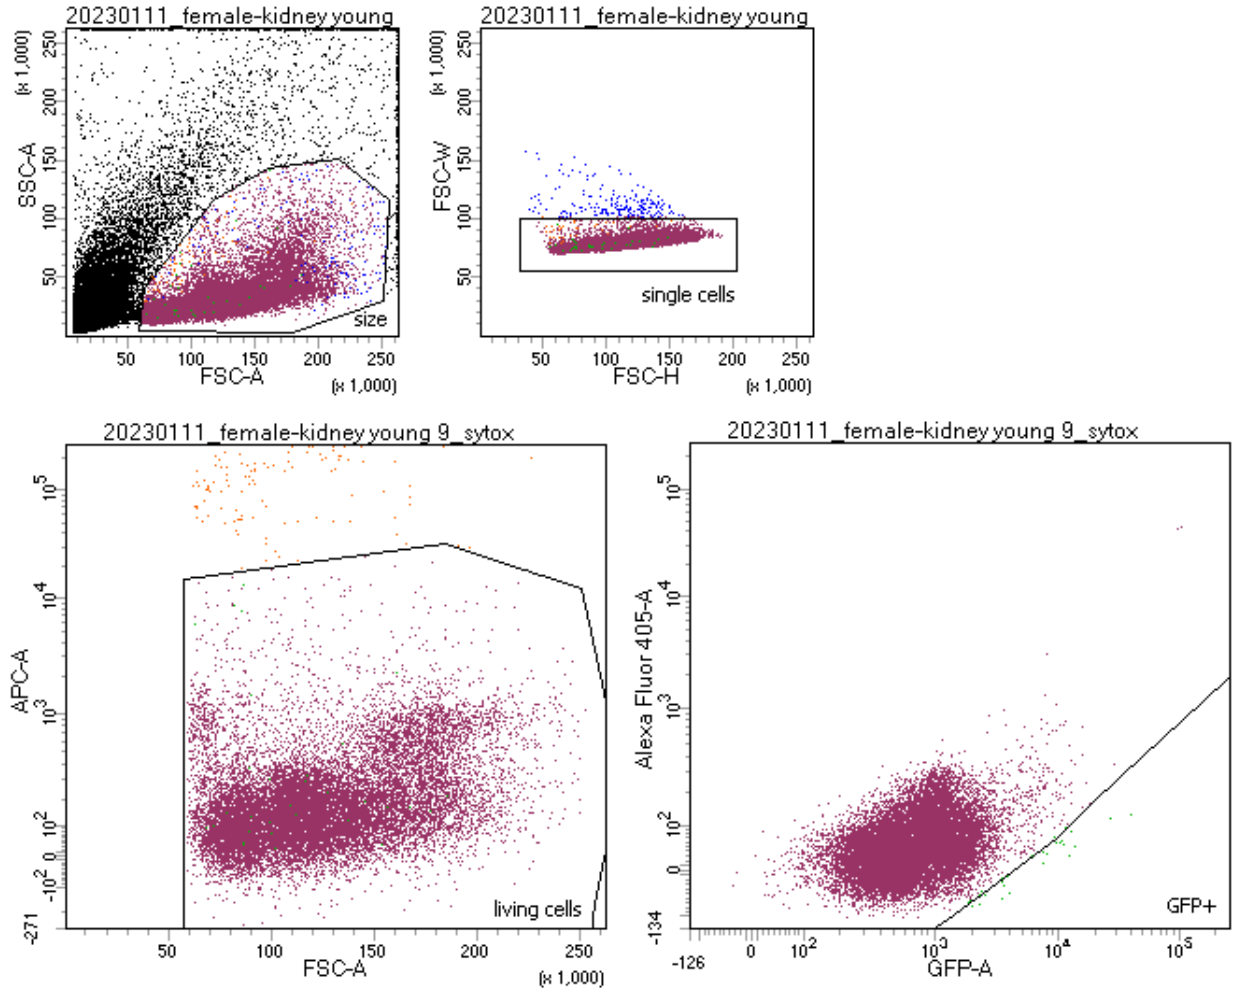

| Tube: kidney young 9_sytox |         |         |        |
|----------------------------|---------|---------|--------|
| Population                 | #Events | %Parent | %Total |
| ■ All Events               | 36,295  | ####    | 100.0  |
| ■ size                     | 19,213  | 52.9    | 52.9   |
| ■ single cells             | 19,013  | 99.0    | 52.4   |
| ■ living cells             | 18,908  | 99.4    | 52.1   |
| ■ GFP+                     | 31      | 0.2     | 0.1    |

|                  |                        |
|------------------|------------------------|
| Experiment Name: | Johannes_Nothro kidney |
| Specimen Name:   | 20230111_female        |
| Tube Name:       | kidney young 9_sytox   |

  

| Population     | #Events | %Parent | %Total  | GFP-A Mean | GFP-A %CV |
|----------------|---------|---------|---------|------------|-----------|
| ■ GFP+         | 31      | 0.1640  | 0.0854  | 7,759      | 103.0     |
| ■ living cells | 18,908  | 99.4477 | 52.0953 | 907        | 159.8     |



# BD FACSDiva 8.0

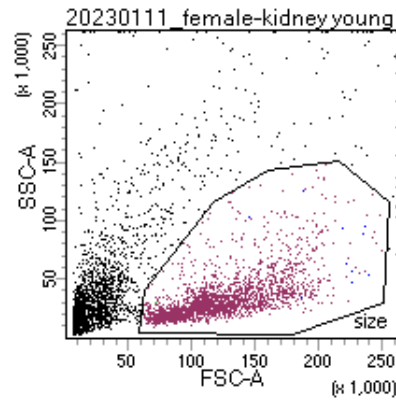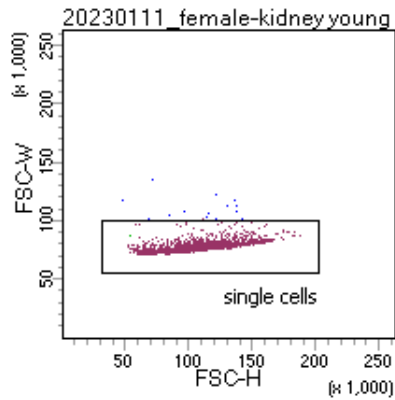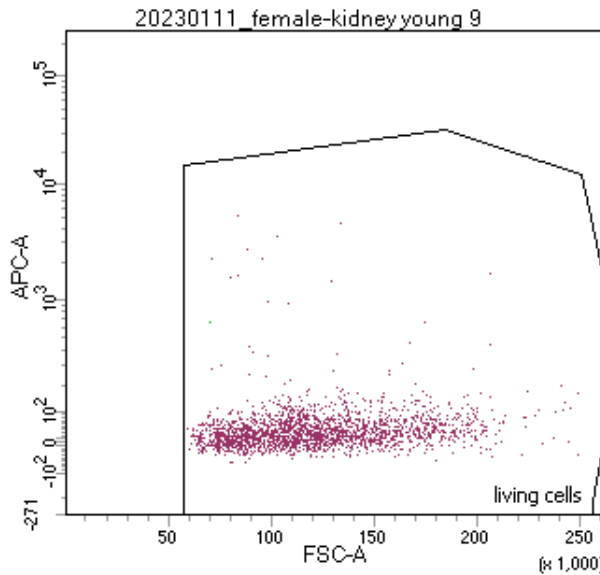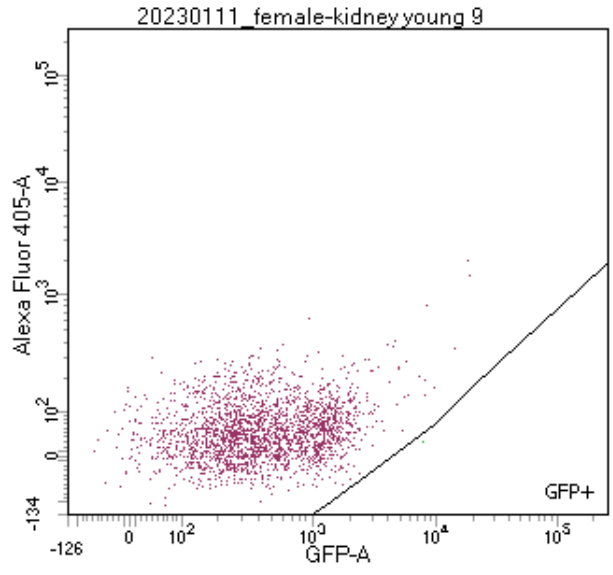

Tube: kidney young 9

| Population   | #Events | %Parent | %Total |
|--------------|---------|---------|--------|
| All Events   | 4,137   | ####    | 100.0  |
| size         | 2,203   | 53.3    | 53.3   |
| single cells | 2,188   | 99.3    | 52.9   |
| living cells | 2,188   | 100.0   | 52.9   |
| GFP+         | 1       | 0.0     | 0.0    |

|                  |                       |
|------------------|-----------------------|
| Experiment Name: | Johannes_Nocho kidney |
| Specimen Name:   | 20230111_female       |
| Tube Name:       | kidney young 9        |

  

| Population   | #Events | %Parent  | %Total  | GFP-A Mean | GFP-A %CV |
|--------------|---------|----------|---------|------------|-----------|
| GFP+         | 1       | 0.0457   | 0.0242  | 7,575      | ####      |
| living cells | 2,188   | 100.0000 | 52.8886 | 656        | 146.8     |
