# Supplementary material for: Generation of a transparent killifish line through multiplex CRISPR/Cas9mediated gene inactivation
Source: eLife journal article supplement (doi:10.7554/elife.81549), 2023-02-23
Supplement: fig5-data1 [file elife-81549-fig5-data1-v3.zip]

# BD FACSDiva 8.0

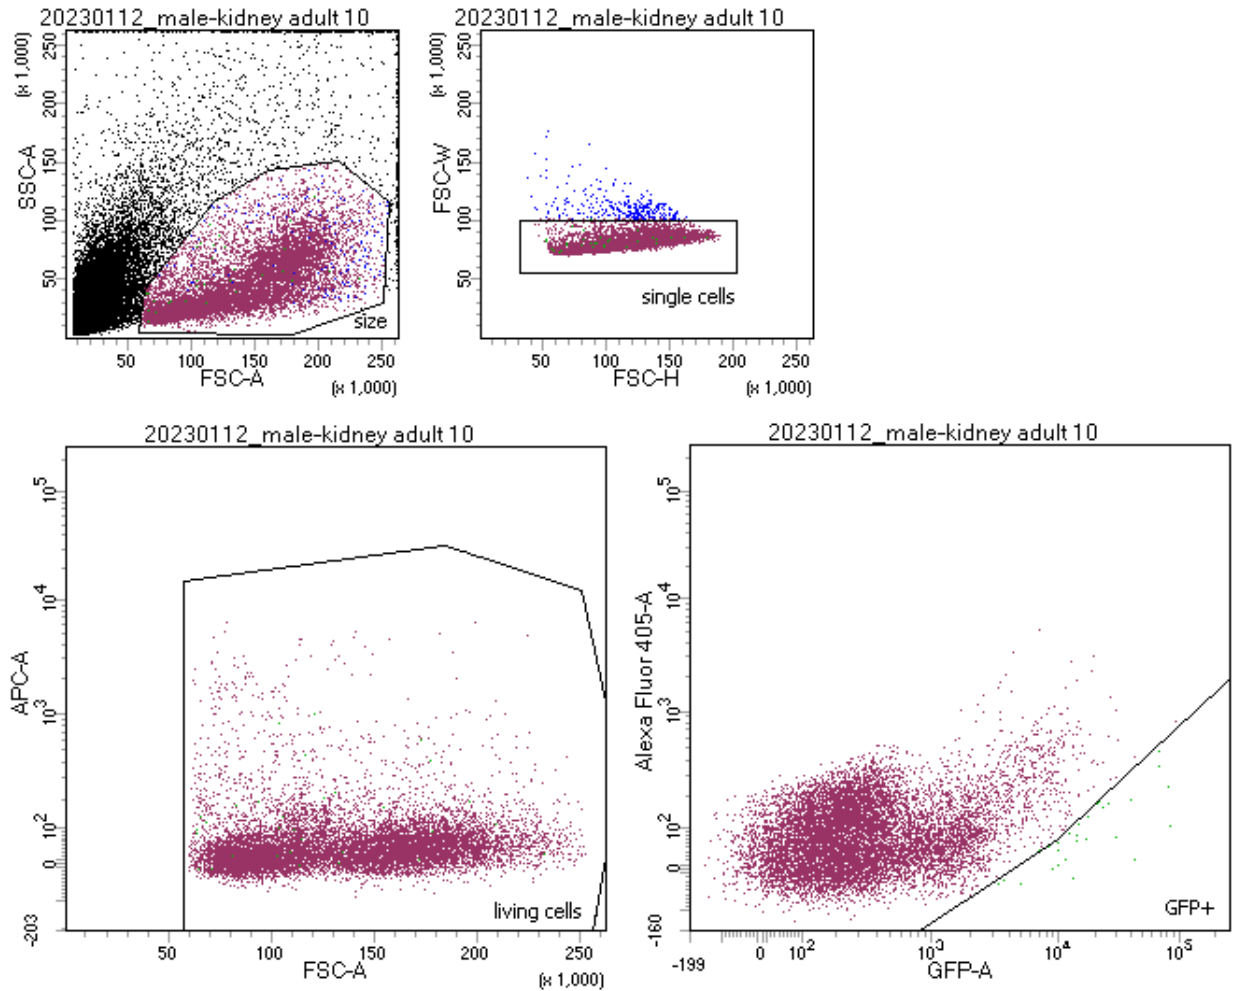

| Tube: kidney adult 10 |         |         |        |
|-----------------------|---------|---------|--------|
| Population            | #Events | %Parent | %Total |
| ■ All Events          | 39,175  | ####    | 100.0  |
| ■ size                | 11,262  | 28.7    | 28.7   |
| ■ single cells        | 10,975  | 97.5    | 28.0   |
| ■ living cells        | 10,975  | 100.0   | 28.0   |
| ■ GFP+                | 31      | 0.3     | 0.1    |

|                  |                        |
|------------------|------------------------|
| Experiment Name: | Johannes_Notheo kidney |
| Specimen Name:   | 20230112_male          |
| Tube Name:       | kidney adult 10        |

  

| Population     | #Events | %Parent  | %Total  | GFP-A Mean | GFP-A %CV |
|----------------|---------|----------|---------|------------|-----------|
| ■ GFP+         | 31      | 0.2825   | 0.0791  | 23,687     | 96.4      |
| ■ living cells | 10,975  | 100.0000 | 28.0153 | 773        | 330.4     |

# BD FACSDiva 8.0

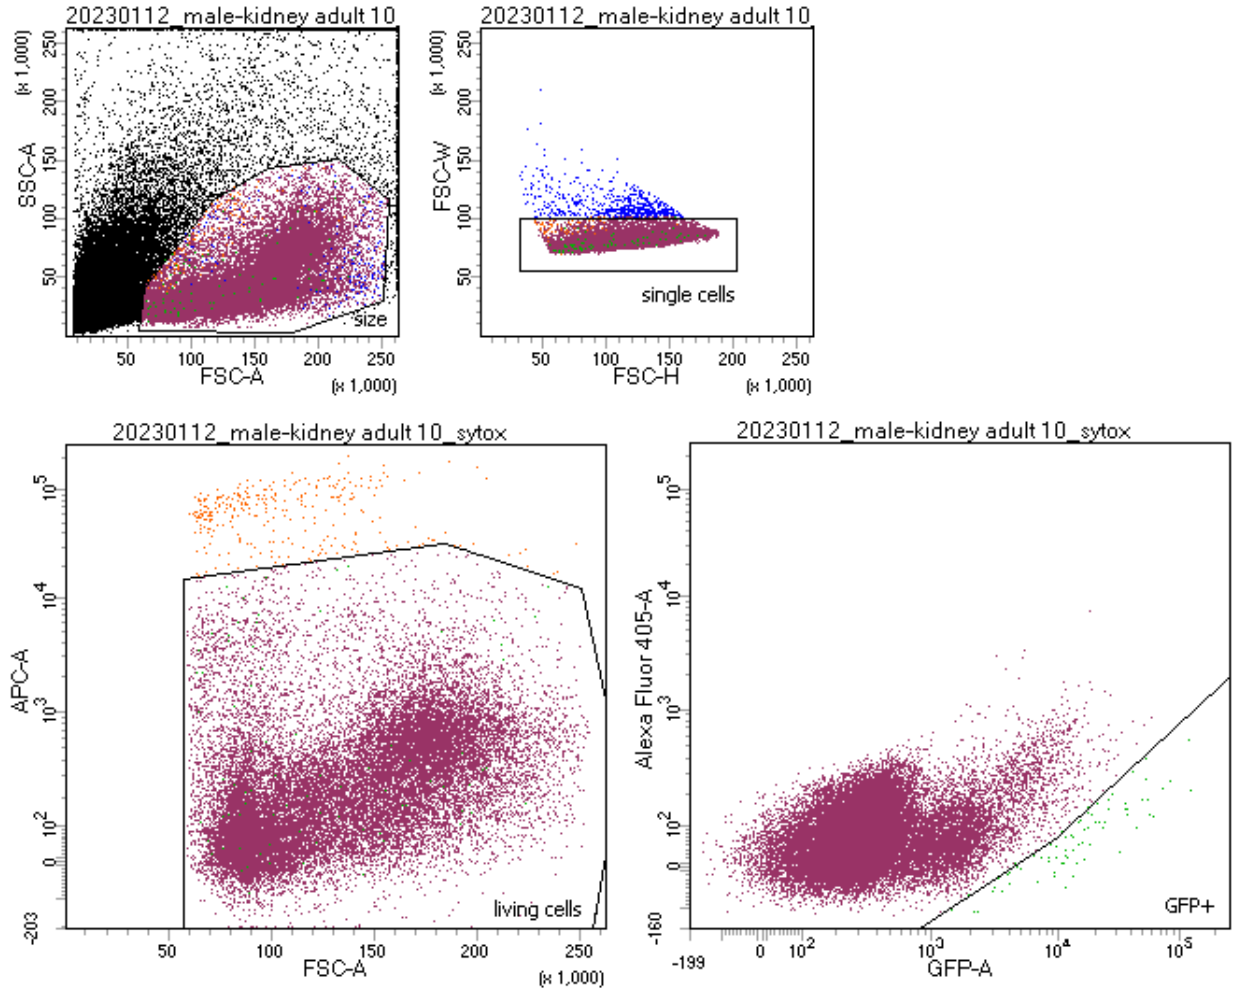

Tube: kidney adult 10\_sytox

| Population     | #Events | %Parent | %Total |
|----------------|---------|---------|--------|
| ■ All Events   | 90,548  | ####    | 100.0  |
| ■ size         | 25,602  | 28.3    | 28.3   |
| ■ single cells | 25,005  | 97.7    | 27.6   |
| ■ living cells | 24,696  | 98.8    | 27.3   |
| ■ GFP+         | 80      | 0.3     | 0.1    |

|                  |                        |
|------------------|------------------------|
| Experiment Name: | Johannes_Nothro kidney |
| Specimen Name:   | 20230112_male          |
| Tube Name:       | kidney adult 10_sytox  |

  

| Population     | #Events | %Parent | %Total  | GFP-A Mean | GFP-A %CV |
|----------------|---------|---------|---------|------------|-----------|
| ■ GFP+         | 80      | 0.3239  | 0.0884  | 21,712     | 111.8     |
| ■ living cells | 24,696  | 98.7642 | 27.2739 | 832        | 301.7     |

# BD FACSDiva 8.0

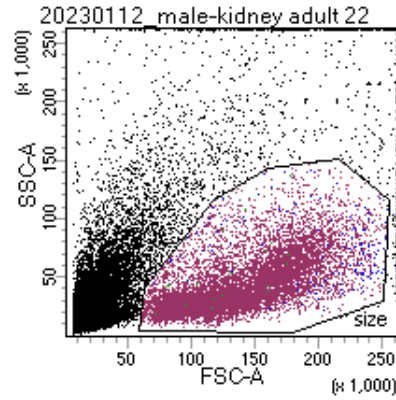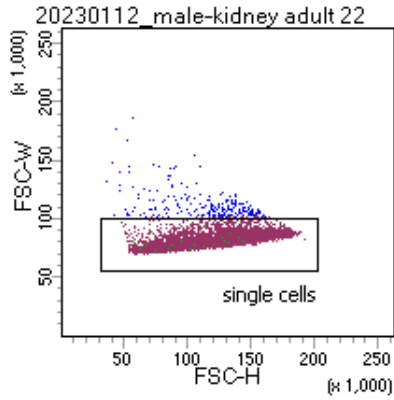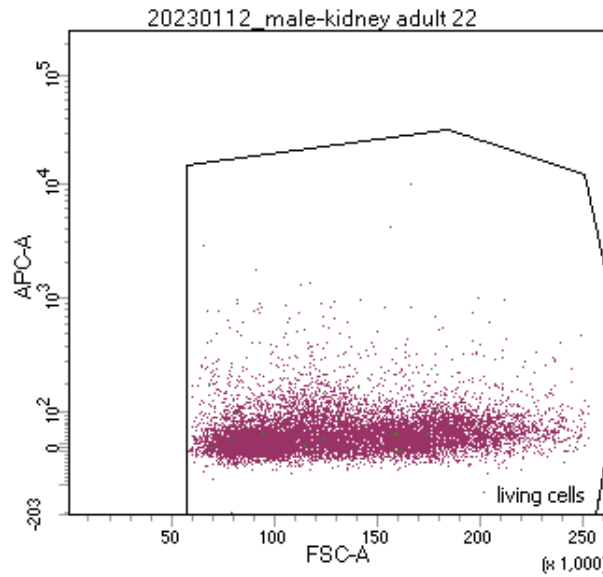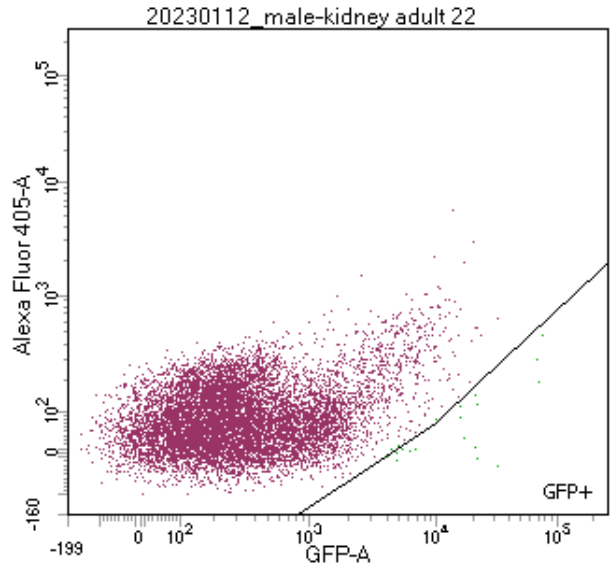

Tube: kidney adult 22

| Population   | #Events | %Parent | %Total |
|--------------|---------|---------|--------|
| All Events   | 28,387  | ####    | 100.0  |
| size         | 10,912  | 38.4    | 38.4   |
| single cells | 10,687  | 97.9    | 37.6   |
| living cells | 10,687  | 100.0   | 37.6   |
| GFP+         | 20      | 0.2     | 0.1    |

|                  |                        |
|------------------|------------------------|
| Experiment Name: | Johannes_Notheo kidney |
| Specimen Name:   | 20230112_male          |
| Tube Name:       | kidney adult 22        |

  

| Population   | #Events | %Parent  | %Total  | GFP-A Mean | GFP-A %CV |
|--------------|---------|----------|---------|------------|-----------|
| GFP+         | 20      | 0.1871   | 0.0705  | 21,700     | 107.4     |
| living cells | 10,687  | 100.0000 | 37.6475 | 664        | 286.4     |

# BD FACSDiva 8.0

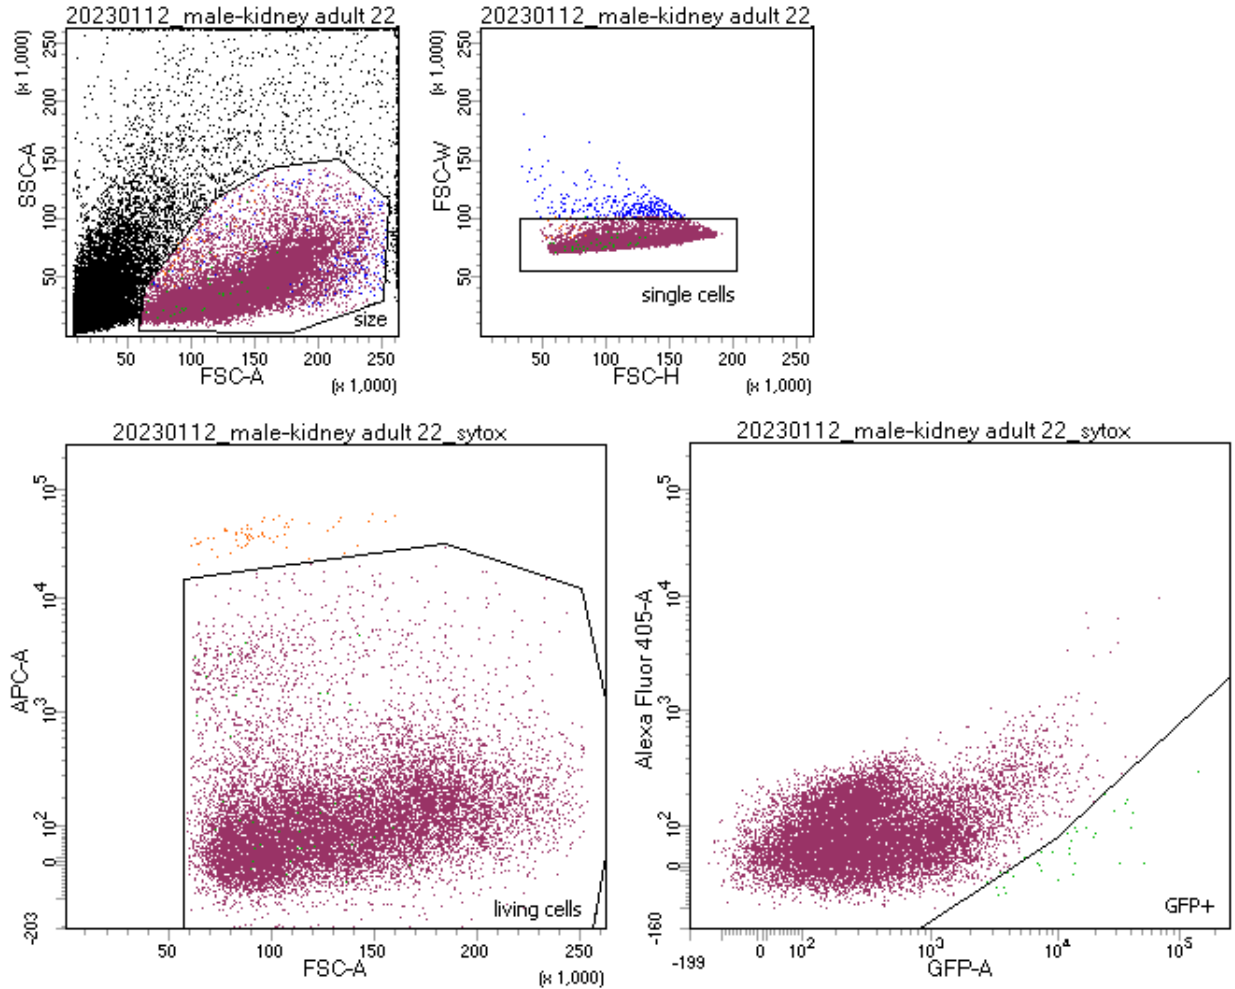

| Tube: kidney adult 22_sytox |         |         |        |
|-----------------------------|---------|---------|--------|
| Population                  | #Events | %Parent | %Total |
| ■ All Events                | 41,222  | ####    | 100.0  |
| ■ size                      | 15,792  | 38.3    | 38.3   |
| ■ single cells              | 15,479  | 98.0    | 37.6   |
| ■ living cells              | 15,413  | 99.6    | 37.4   |
| ■ GFP+                      | 36      | 0.2     | 0.1    |

|                  |                        |
|------------------|------------------------|
| Experiment Name: | Johannes_Notheo kidney |
| Specimen Name:   | 20230112_male          |
| Tube Name:       | kidney adult 22_sytox  |

  

| Population     | #Events | %Parent | %Total  | GFP-A Mean | GFP-A %CV |
|----------------|---------|---------|---------|------------|-----------|
| ■ GFP+         | 36      | 0.2336  | 0.0873  | 19,711     | 128.9     |
| ■ living cells | 15,413  | 99.5736 | 37.3902 | 726        | 303.3     |

# BD FACSDiva 8.0

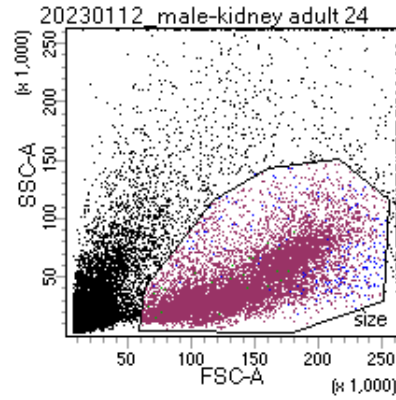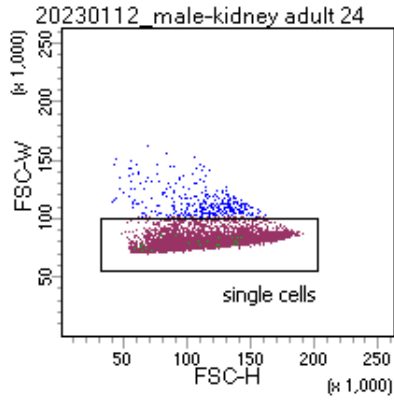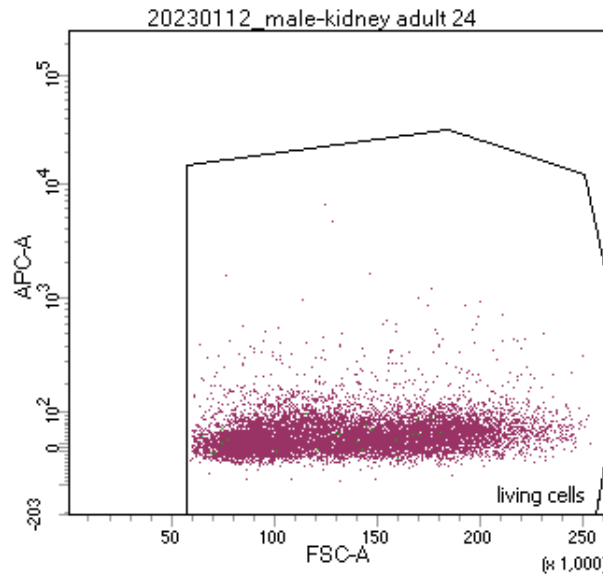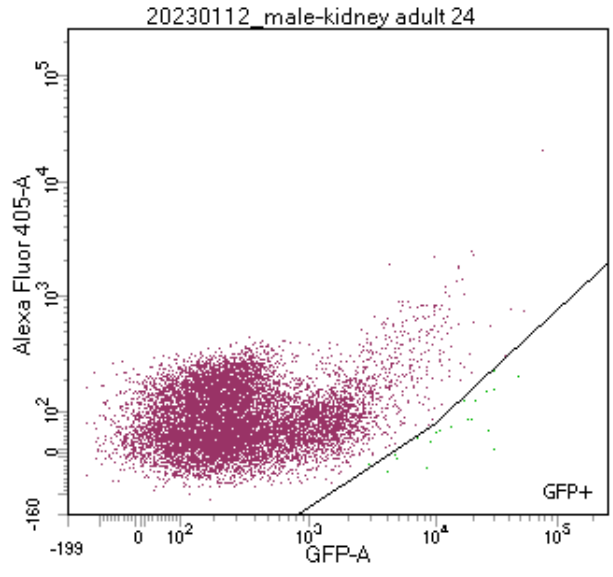

| Tube: kidney adult 24 |         |         |        |
|-----------------------|---------|---------|--------|
| Population            | #Events | %Parent | %Total |
| ■ All Events          | 21,757  | ####    | 100.0  |
| ■ size                | 10,866  | 49.9    | 49.9   |
| ■ single cells        | 10,543  | 97.0    | 48.5   |
| ■ living cells        | 10,543  | 100.0   | 48.5   |
| ■ GFP+                | 22      | 0.2     | 0.1    |

|                  |                        |
|------------------|------------------------|
| Experiment Name: | Johannes_Notheo kidney |
| Specimen Name:   | 20230112_male          |
| Tube Name:       | kidney adult 24        |

  

| Population     | #Events | %Parent  | %Total  | GFP-A Mean | GFP-A %CV |
|----------------|---------|----------|---------|------------|-----------|
| ■ GFP+         | 22      | 0.2087   | 0.1011  | 18,532     | 76.4      |
| ■ living cells | 10,543  | 100.0000 | 48.4580 | 661        | 294.9     |

# BD FACSDiva 8.0

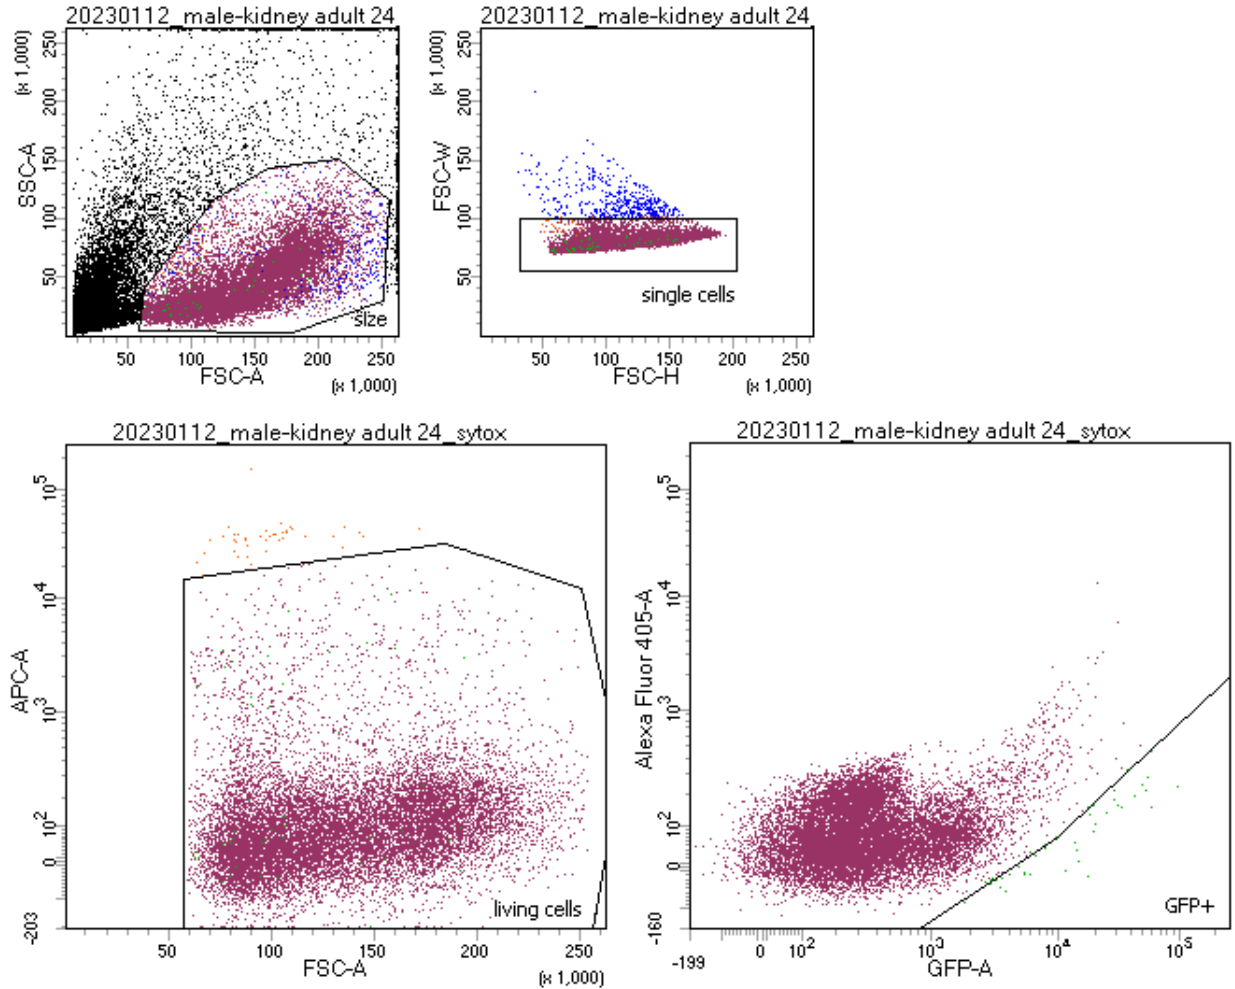

| Tube: kidney adult 24_sytox |         |         |        |
|-----------------------------|---------|---------|--------|
| Population                  | #Events | %Parent | %Total |
| ■ All Events                | 30,495  | ####    | 100.0  |
| ■ size                      | 14,960  | 49.1    | 49.1   |
| ■ single cells              | 14,506  | 97.0    | 47.6   |
| ■ living cells              | 14,465  | 99.7    | 47.4   |
| ■ GFP+                      | 45      | 0.3     | 0.1    |

|                  |                        |
|------------------|------------------------|
| Experiment Name: | Johannes_Notheo kidney |
| Specimen Name:   | 20230112_male          |
| Tube Name:       | kidney adult 24_sytox  |

  

| Population     | #Events | %Parent | %Total  | GFP-A Mean | GFP-A %CV |
|----------------|---------|---------|---------|------------|-----------|
| ■ GFP+         | 45      | 0.3111  | 0.1476  | 19,416     | 107.8     |
| ■ living cells | 14,465  | 99.7174 | 47.4340 | 704        | 303.4     |



# BD FACSDiva 8.0

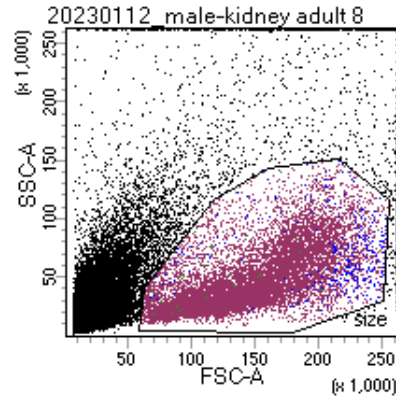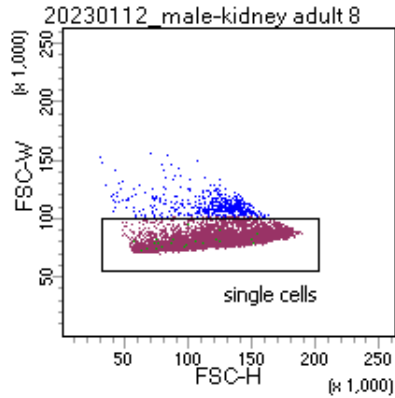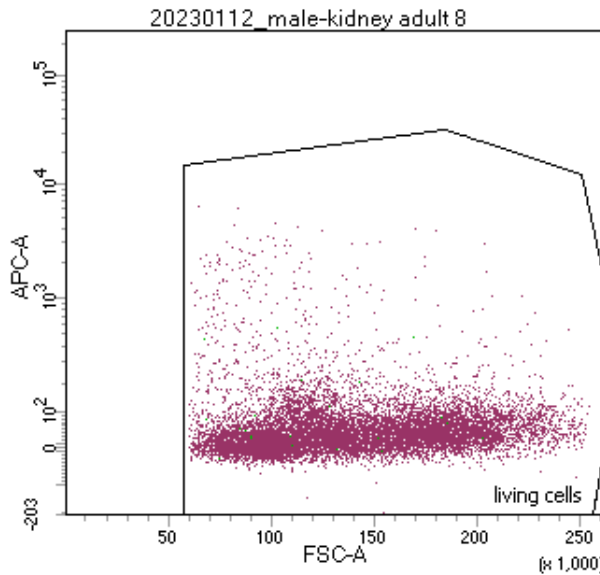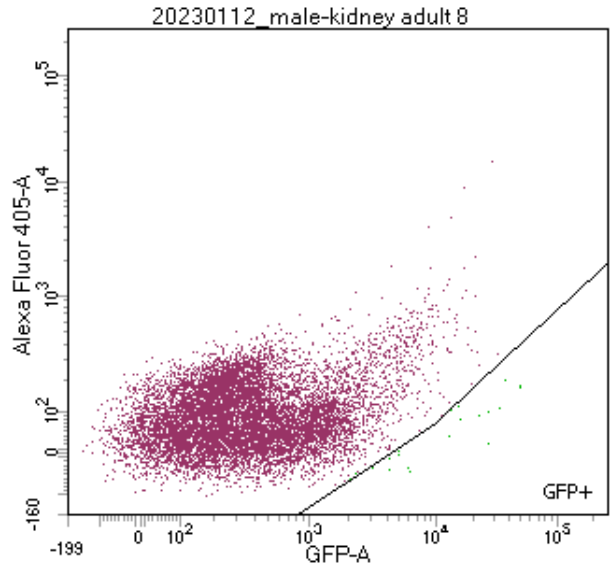

| Tube: kidney adult 8 |         |         |        |
|----------------------|---------|---------|--------|
| Population           | #Events | %Parent | %Total |
| All Events           | 37,360  | ####    | 100.0  |
| size                 | 11,364  | 30.4    | 30.4   |
| single cells         | 10,843  | 95.4    | 29.0   |
| living cells         | 10,843  | 100.0   | 29.0   |
| GFP+                 | 21      | 0.2     | 0.1    |

|                  |                        |
|------------------|------------------------|
| Experiment Name: | Johannes_Notheo kidney |
| Specimen Name:   | 20230112_male          |
| Tube Name:       | kidney adult 8         |

  

| Population   | #Events | %Parent  | %Total  | GFP-A Mean | GFP-A %CV |
|--------------|---------|----------|---------|------------|-----------|
| GFP+         | 21      | 0.1937   | 0.0562  | 16,299     | 95.1      |
| living cells | 10,843  | 100.0000 | 29.0230 | 705        | 239.0     |

# BD FACSDiva 8.0

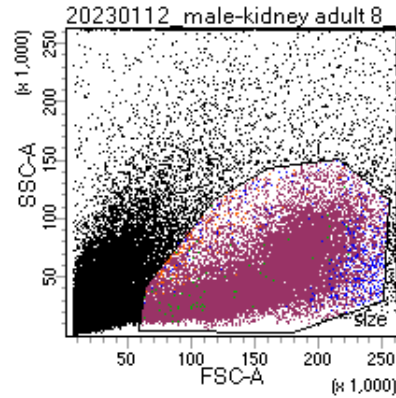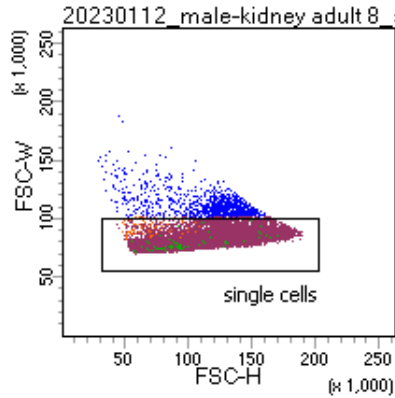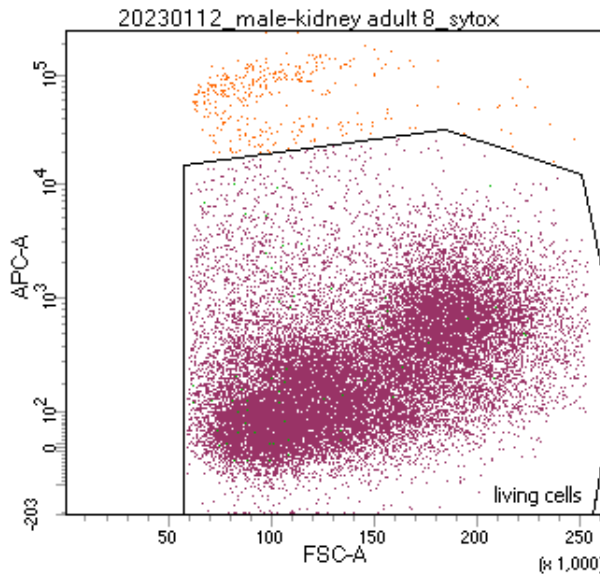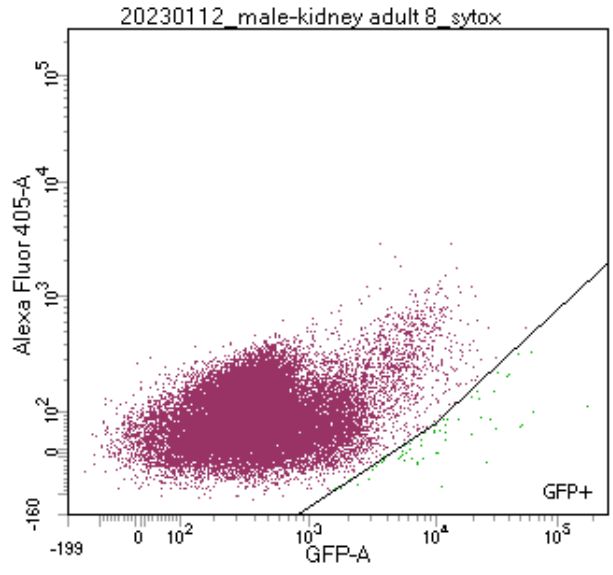

Tube: kidney adult 8\_sytox

| Population   | #Events | %Parent | %Total |
|--------------|---------|---------|--------|
| All Events   | 89,148  | ####    | 100.0  |
| size         | 26,147  | 29.3    | 29.3   |
| single cells | 25,059  | 95.8    | 28.1   |
| living cells | 24,713  | 98.6    | 27.7   |
| GFP+         | 62      | 0.3     | 0.1    |

|                  |                        |
|------------------|------------------------|
| Experiment Name: | Johannes_Notheo kidney |
| Specimen Name:   | 20230112_male          |
| Tube Name:       | kidney adult 8_sytox   |

  

| Population   | #Events | %Parent | %Total  | GFP-A Mean | GFP-A %CV |
|--------------|---------|---------|---------|------------|-----------|
| GFP+         | 62      | 0.2509  | 0.0695  | 17,926     | 147.7     |
| living cells | 24,713  | 98.6193 | 27.7213 | 769        | 270.1     |



# BD FACSDiva 8.0

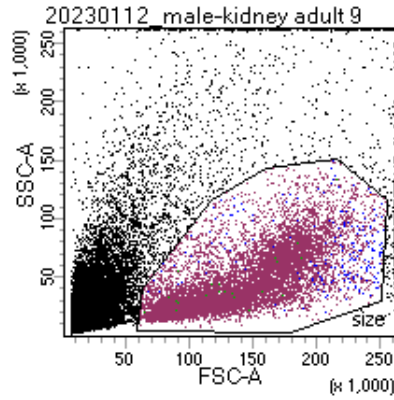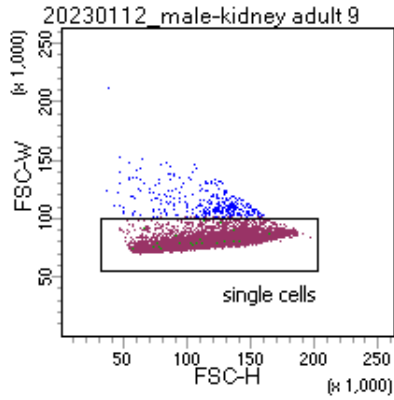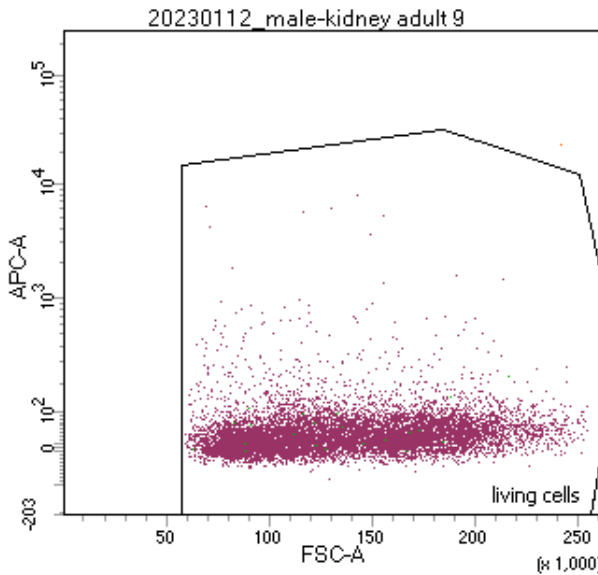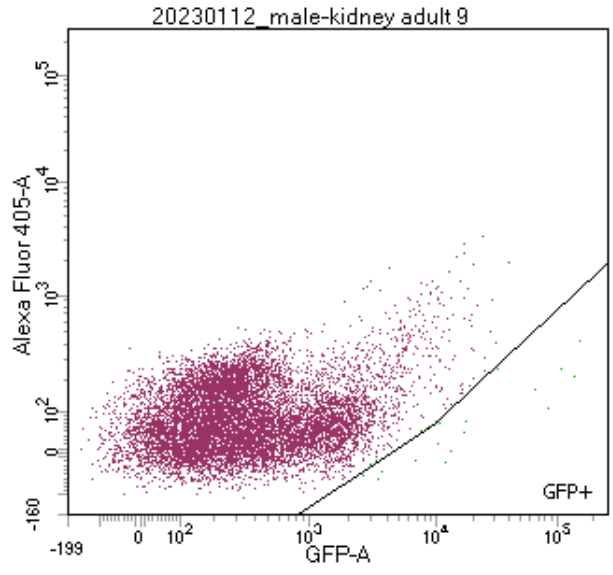

Tube: kidney adult 9

| Population   | #Events | %Parent | %Total |
|--------------|---------|---------|--------|
| All Events   | 27,410  | ####    | 100.0  |
| size         | 10,840  | 39.5    | 39.5   |
| single cells | 10,497  | 96.8    | 38.3   |
| living cells | 10,496  | 100.0   | 38.3   |
| GFP+         | 21      | 0.2     | 0.1    |

|                  |                        |
|------------------|------------------------|
| Experiment Name: | Johannes_Notheo kidney |
| Specimen Name:   | 20230112_male          |
| Tube Name:       | kidney adult 9         |

  

| Population   | #Events | %Parent | %Total  | GFP-A Mean | GFP-A %CV |
|--------------|---------|---------|---------|------------|-----------|
| GFP+         | 21      | 0.2001  | 0.0766  | 34,270     | 139.7     |
| living cells | 10,496  | 99.9905 | 38.2926 | 762        | 396.0     |

# BD FACSDiva 8.0

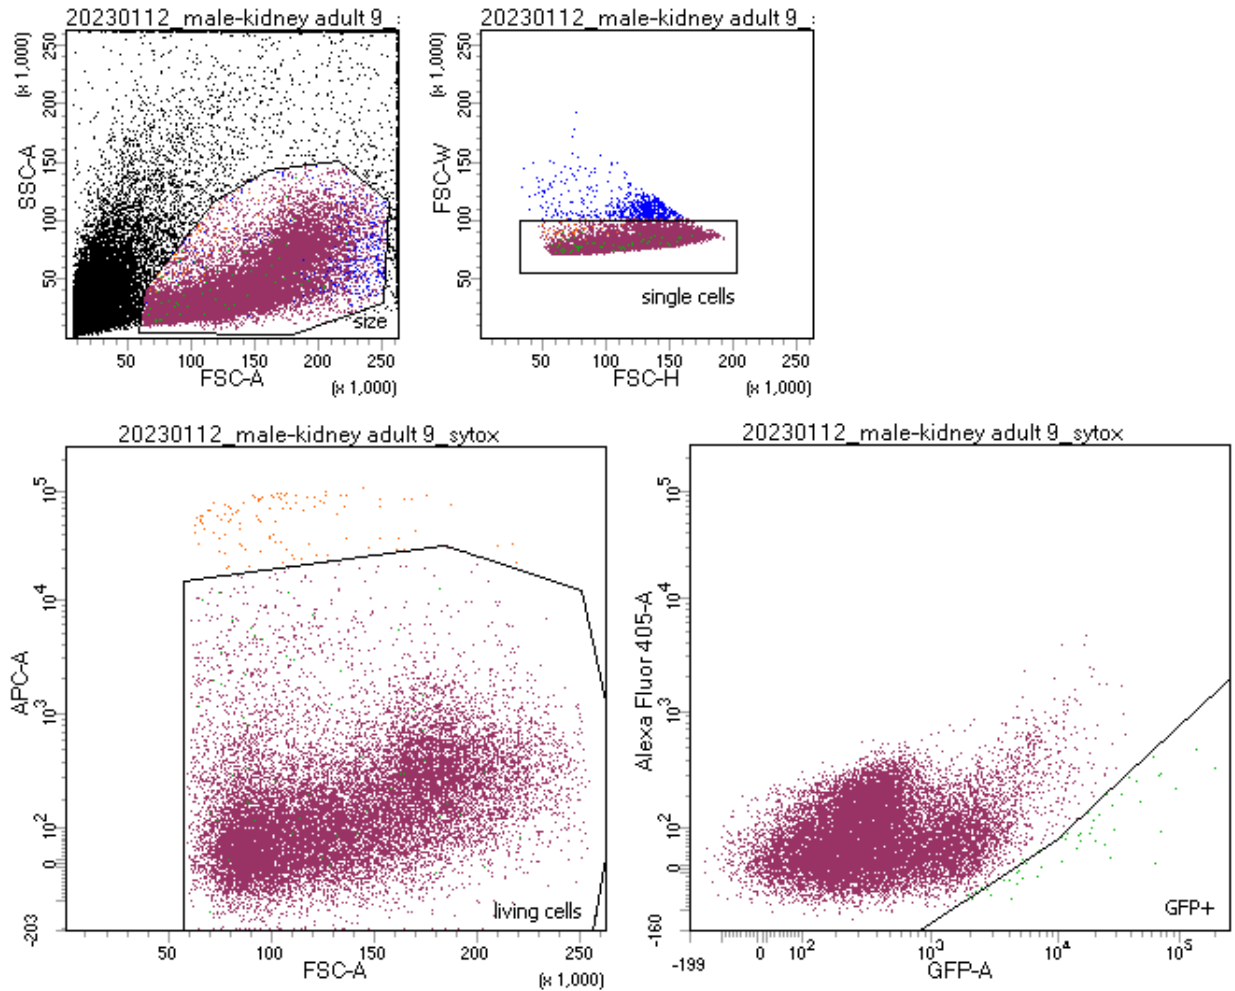

| Tube: kidney adult 9_sytox |         |         |        |
|----------------------------|---------|---------|--------|
| Population                 | #Events | %Parent | %Total |
| ■ All Events               | 48,152  | ####    | 100.0  |
| ■ size                     | 19,248  | 40.0    | 40.0   |
| ■ single cells             | 18,668  | 97.0    | 38.8   |
| ■ living cells             | 18,562  | 99.4    | 38.5   |
| ■ GFP+                     | 54      | 0.3     | 0.1    |

|                  |                        |
|------------------|------------------------|
| Experiment Name: | Johannes_Notheo kidney |
| Specimen Name:   | 20230112_male          |
| Tube Name:       | kidney adult 9_sytox   |

  

| Population     | #Events | %Parent | %Total  | GFP-A Mean | GFP-A %CV |
|----------------|---------|---------|---------|------------|-----------|
| ■ GFP+         | 54      | 0.2909  | 0.1121  | 26,179     | 139.4     |
| ■ living cells | 18,562  | 99.4322 | 38.5488 | 800        | 348.0     |

# BD FACSDiva 8.0

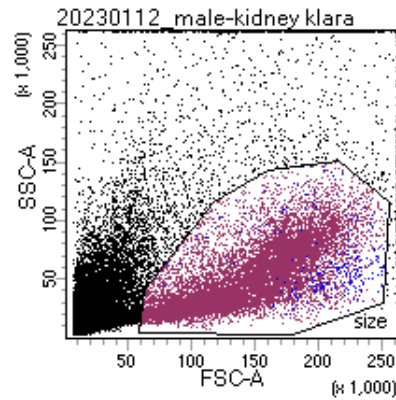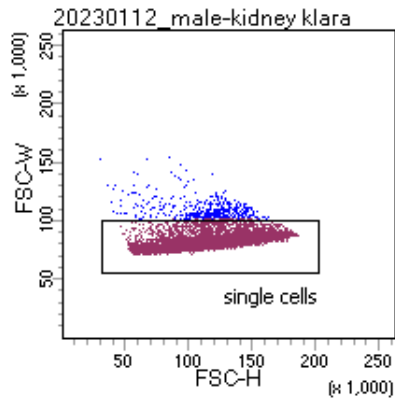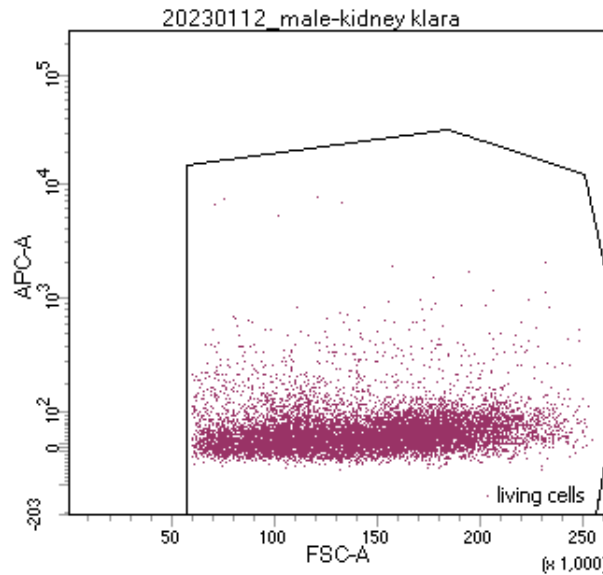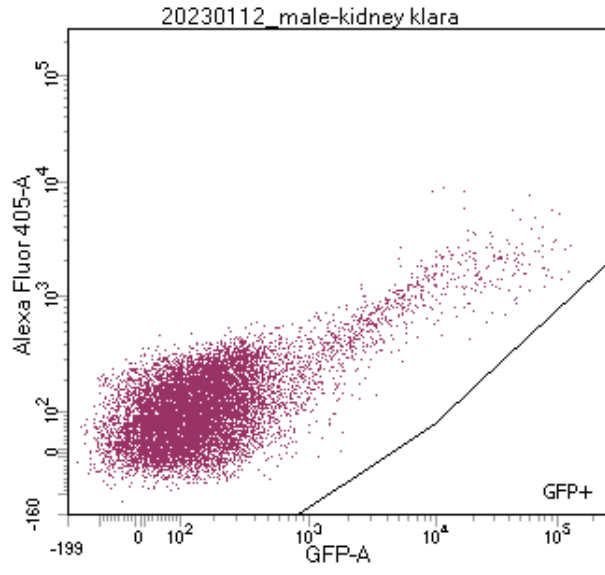

| Tube: kidney klara |         |         |        |
|--------------------|---------|---------|--------|
| Population         | #Events | %Parent | %Total |
| ■ All Events       | 29,598  | ####    | 100.0  |
| ■ size             | 11,138  | 37.6    | 37.6   |
| ■ single cells     | 10,659  | 95.7    | 36.0   |
| ■ living cells     | 10,659  | 100.0   | 36.0   |
| ■ GFP+             | 0       | 0.0     | 0.0    |

| Experiment Name: |         | Johannes_Notheo kidney |         |            |           |
|------------------|---------|------------------------|---------|------------|-----------|
| Specimen Name:   |         | 20230112_male          |         |            |           |
| Tube Name:       |         | kidney klara           |         |            |           |
| Population       | #Events | %Parent                | %Total  | GFP-A Mean | GFP-A %CV |
| ■ GFP+           | 0       | 0.0000                 | 0.0000  | ####       | ####      |
| ■ living cells   | 10,659  | 100.0000               | 36.0126 | 826        | 651.8     |

# BD FACSDiva 8.0

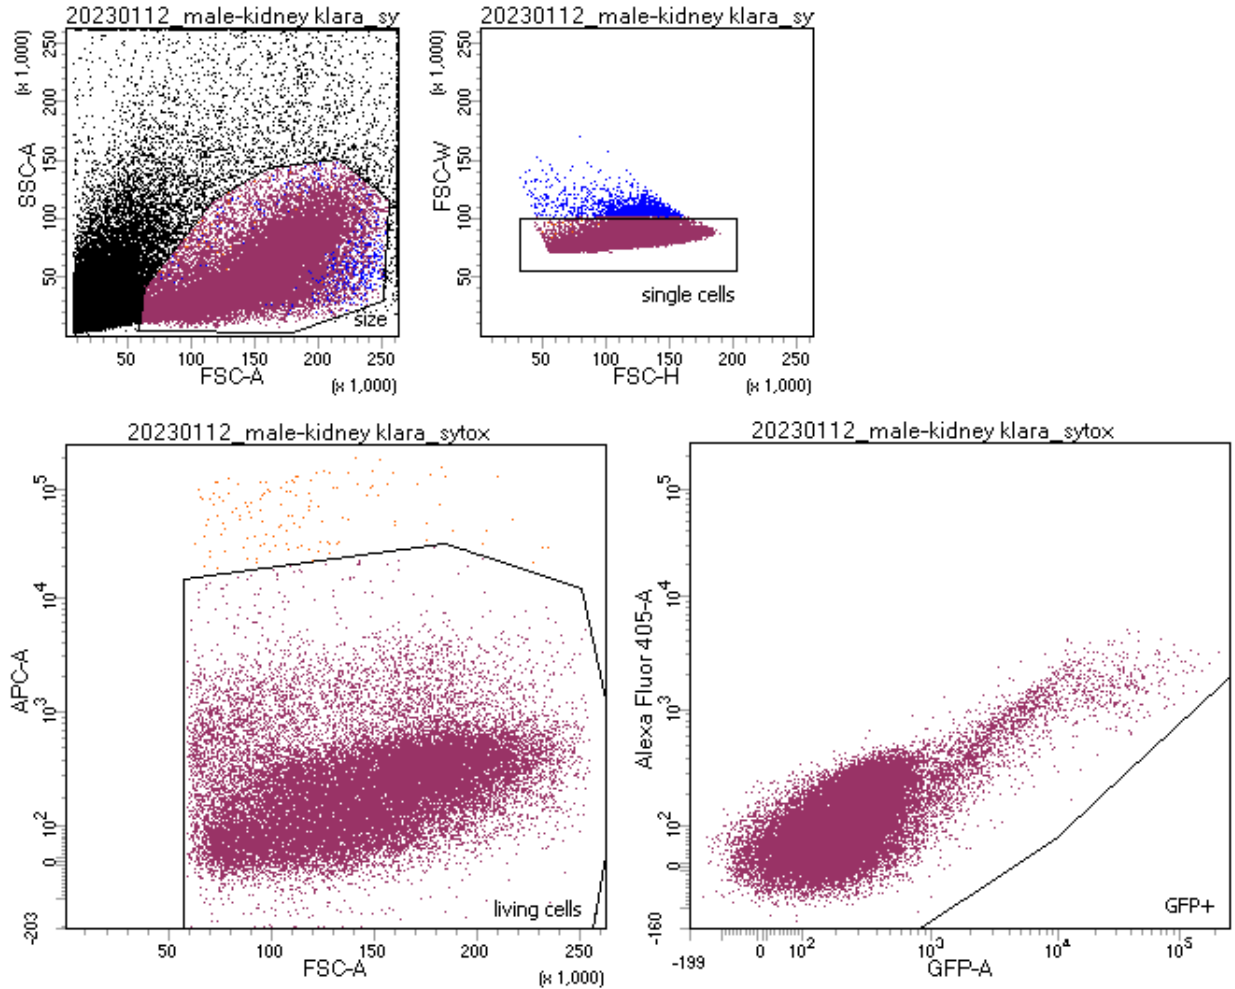

| Tube: kidney klara_sytox |         |         |        |
|--------------------------|---------|---------|--------|
| Population               | #Events | %Parent | %Total |
| ■ All Events             | 83,100  | ####    | 100.0  |
| ■ size                   | 31,640  | 38.1    | 38.1   |
| ■ single cells           | 30,198  | 95.4    | 36.3   |
| ■ living cells           | 30,067  | 99.6    | 36.2   |
| ■ GFP+                   | 0       | 0.0     | 0.0    |

|                  |                        |
|------------------|------------------------|
| Experiment Name: | Johannes_Nothro kidney |
| Specimen Name:   | 20230112_male          |
| Tube Name:       | kidney klara_sytox     |

  

| Population     | #Events | %Parent | %Total  | GFP-A Mean | GFP-A %CV |
|----------------|---------|---------|---------|------------|-----------|
| ■ GFP+         | 0       | 0.0000  | 0.0000  | ####       | ####      |
| ■ living cells | 30,067  | 99.5662 | 36.1817 | 811        | 606.1     |

# BD FACSDiva 8.0

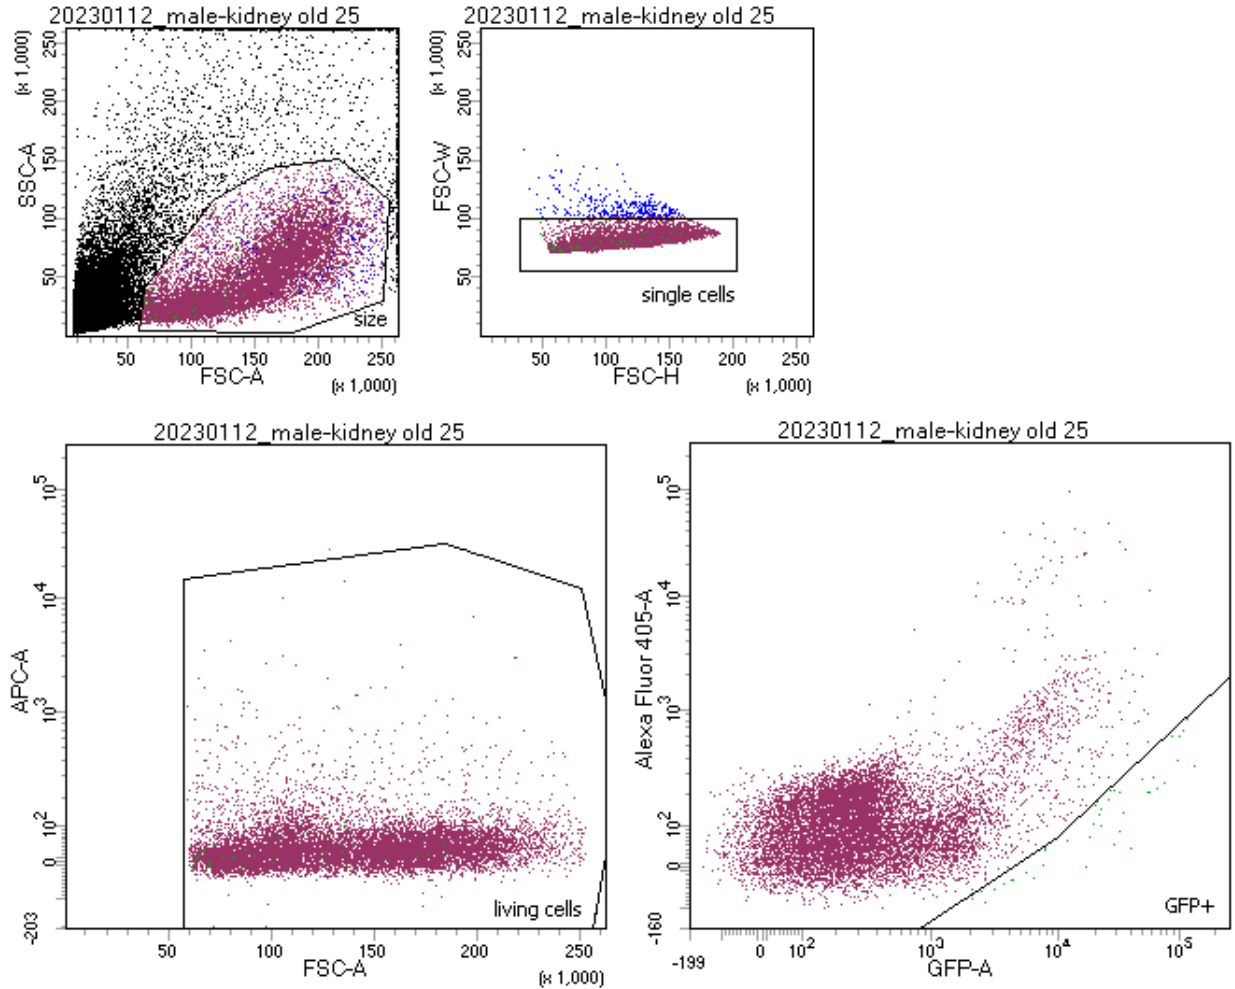

| Tube: kidney old 25 |         |         |        |
|---------------------|---------|---------|--------|
| Population          | #Events | %Parent | %Total |
| ■ All Events        | 30,409  | ####    | 100.0  |
| ■ size              | 11,059  | 36.4    | 36.4   |
| ■ single cells      | 10,747  | 97.2    | 35.3   |
| ■ living cells      | 10,746  | 100.0   | 35.3   |
| ■ GFP+              | 47      | 0.4     | 0.2    |

|                  |                        |
|------------------|------------------------|
| Experiment Name: | Johannes_Notheo kidney |
| Specimen Name:   | 20230112_male          |
| Tube Name:       | kidney old 25          |

  

| Population     | #Events | %Parent | %Total  | GFP-A Mean | GFP-A %CV |
|----------------|---------|---------|---------|------------|-----------|
| ■ GFP+         | 47      | 0.4374  | 0.1546  | 33,815     | 103.6     |
| ■ living cells | 10,746  | 99.9907 | 35.3382 | 1,094      | 394.5     |

# BD FACSDiva 8.0

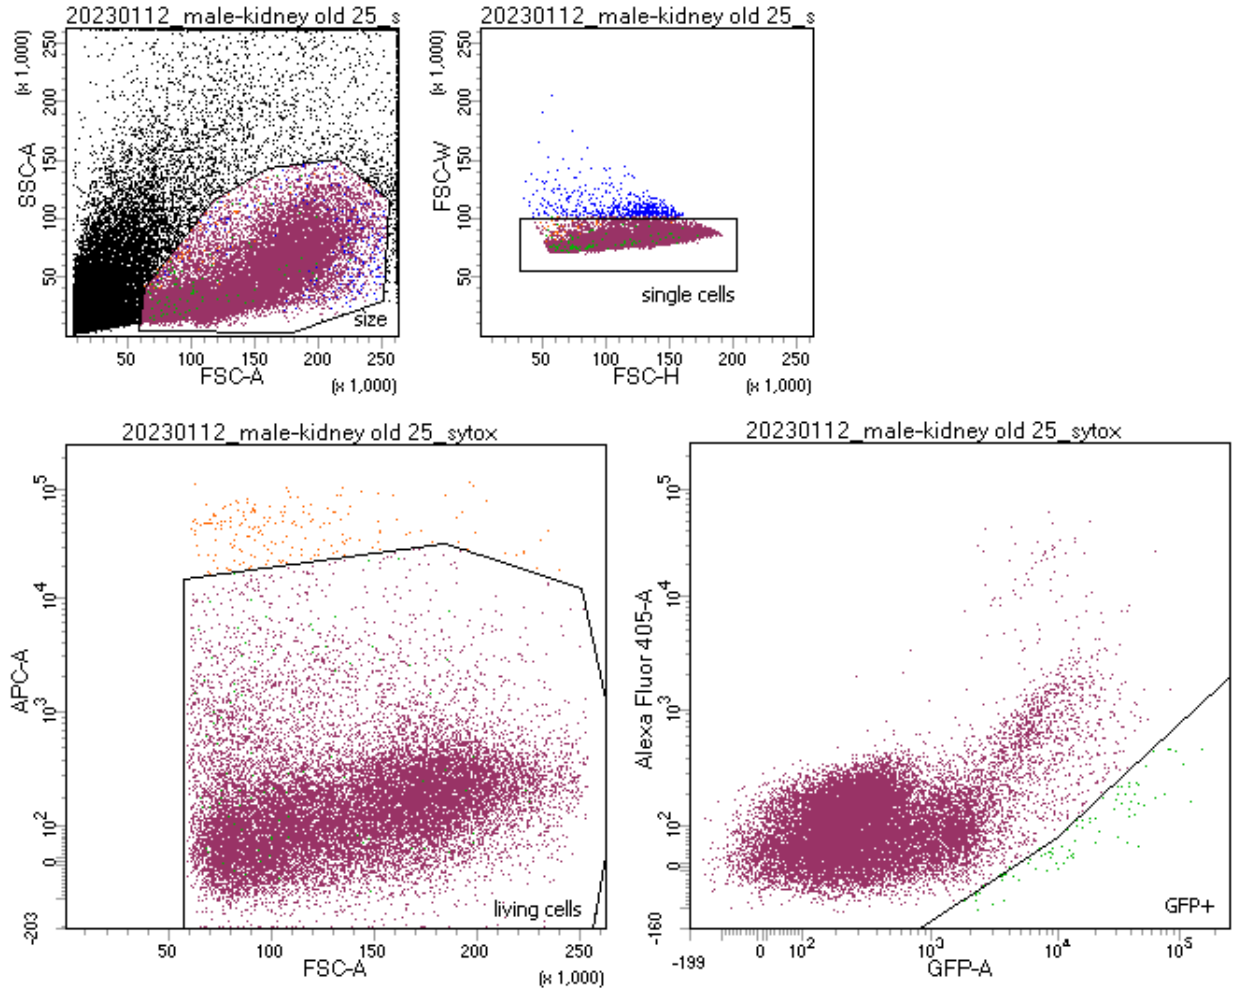

| Tube: kidney old 25_sytox |         |         |        |
|---------------------------|---------|---------|--------|
| Population                | #Events | %Parent | %Total |
| ■ All Events              | 59,388  | ####    | 100.0  |
| ■ size                    | 21,123  | 35.6    | 35.6   |
| ■ single cells            | 20,564  | 97.4    | 34.6   |
| ■ living cells            | 20,370  | 99.1    | 34.3   |
| ■ GFP+                    | 91      | 0.4     | 0.2    |

|                  |                        |
|------------------|------------------------|
| Experiment Name: | Johannes_Notheo kidney |
| Specimen Name:   | 20230112_male          |
| Tube Name:       | kidney old 25_sytox    |

  

| Population     | #Events | %Parent | %Total  | GFP-A Mean | GFP-A %CV |
|----------------|---------|---------|---------|------------|-----------|
| ■ GFP+         | 91      | 0.4467  | 0.1532  | 25,451     | 113.9     |
| ■ living cells | 20,370  | 99.0566 | 34.2999 | 1,080      | 348.5     |



# BD FACSDiva 8.0

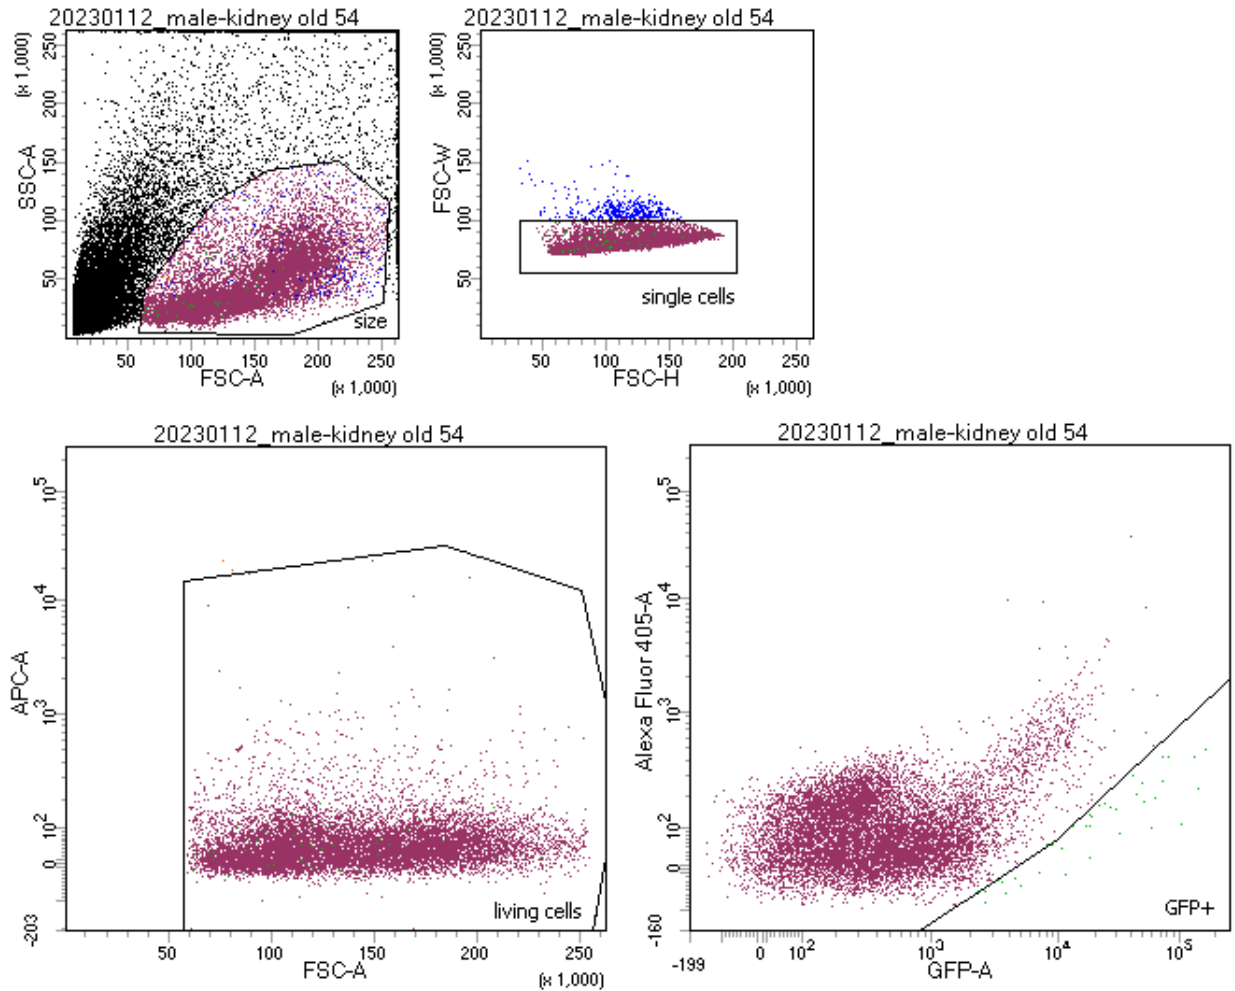

| Tube: kidney old 54 |         |         |        |
|---------------------|---------|---------|--------|
| Population          | #Events | %Parent | %Total |
| ■ All Events        | 33,047  | ####    | 100.0  |
| ■ size              | 11,371  | 34.4    | 34.4   |
| ■ single cells      | 10,982  | 96.6    | 33.2   |
| ■ living cells      | 10,979  | 100.0   | 33.2   |
| ■ GFP+              | 39      | 0.4     | 0.1    |

|                  |                        |
|------------------|------------------------|
| Experiment Name: | Johannes_Notheo kidney |
| Specimen Name:   | 20230112_male          |
| Tube Name:       | kidney old 54          |

  

| Population     | #Events | %Parent | %Total  | GFP-A Mean | GFP-A %CV |
|----------------|---------|---------|---------|------------|-----------|
| ■ GFP+         | 39      | 0.3552  | 0.1180  | 36,569     | 116.7     |
| ■ living cells | 10,979  | 99.9727 | 33.2224 | 1,077      | 376.4     |

# BD FACSDiva 8.0

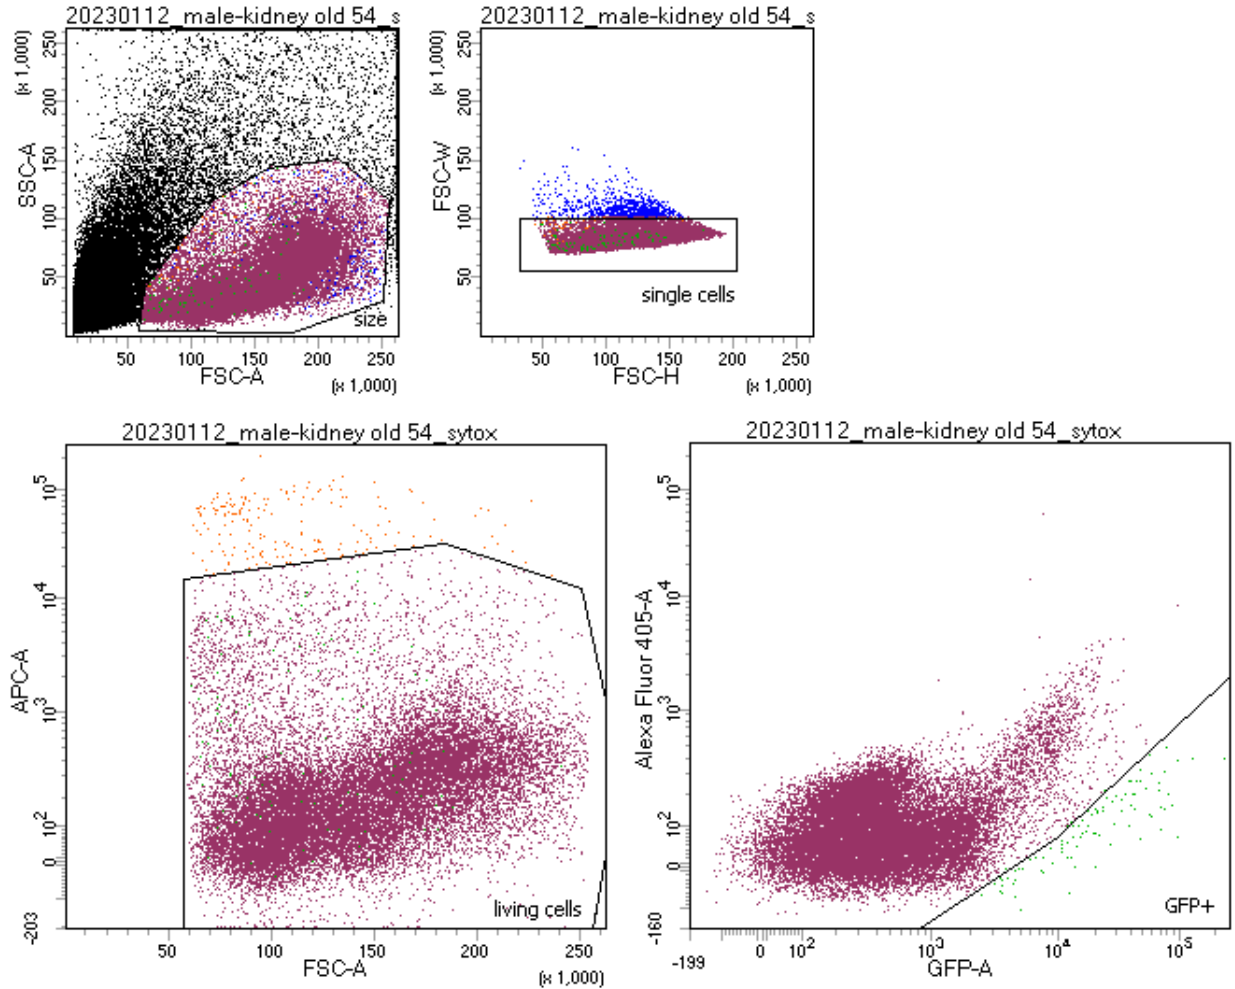

Tube: kidney old 54\_sytox

| Population     | #Events | %Parent | %Total |
|----------------|---------|---------|--------|
| ■ All Events   | 71,787  | ####    | 100.0  |
| ■ size         | 24,514  | 34.1    | 34.1   |
| ■ single cells | 23,720  | 96.8    | 33.0   |
| ■ living cells | 23,527  | 99.2    | 32.8   |
| ■ GFP+         | 98      | 0.4     | 0.1    |

|                  |                        |
|------------------|------------------------|
| Experiment Name: | Johannes_Nothro kidney |
| Specimen Name:   | 20230112_male          |
| Tube Name:       | kidney old 54_sytox    |

  

| Population     | #Events | %Parent | %Total  | GFP-A Mean | GFP-A %CV |
|----------------|---------|---------|---------|------------|-----------|
| ■ GFP+         | 98      | 0.4165  | 0.1365  | 30,053     | 114.2     |
| ■ living cells | 23,527  | 99.1863 | 32.7733 | 1,126      | 332.7     |

# BD FACSDiva 8.0

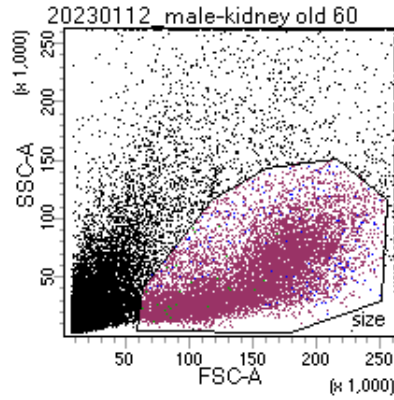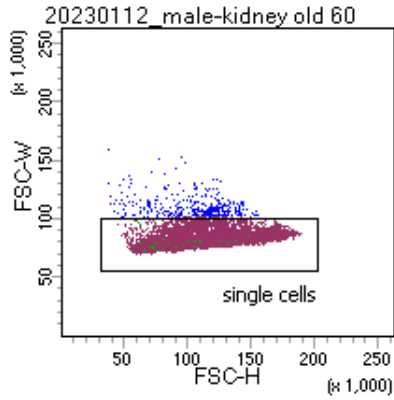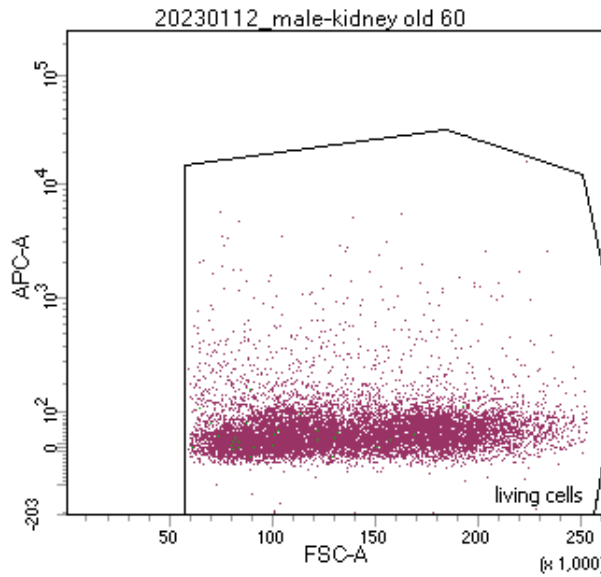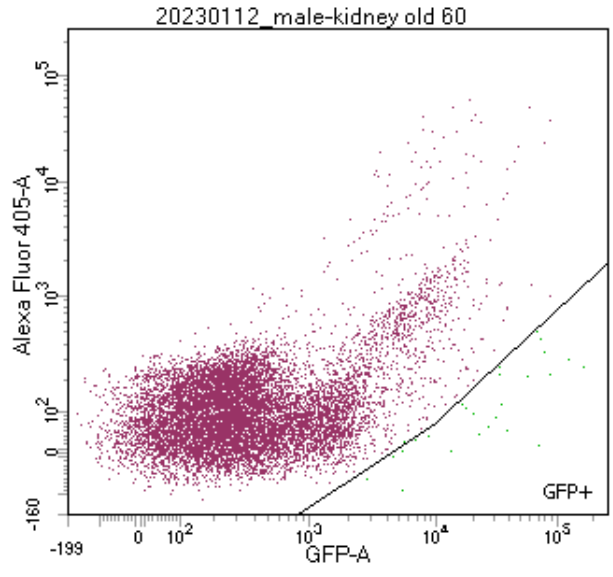

Tube: kidney old 60

| Population   | #Events | %Parent | %Total |
|--------------|---------|---------|--------|
| All Events   | 28,619  | ####    | 100.0  |
| size         | 11,327  | 39.6    | 39.6   |
| single cells | 10,944  | 96.6    | 38.2   |
| living cells | 10,944  | 100.0   | 38.2   |
| GFP+         | 27      | 0.2     | 0.1    |

|                  |                        |
|------------------|------------------------|
| Experiment Name: | Johannes_Notheo kidney |
| Specimen Name:   | 20230112_male          |
| Tube Name:       | kidney old 60          |

  

| Population   | #Events | %Parent  | %Total  | GFP-A Mean | GFP-A %CV |
|--------------|---------|----------|---------|------------|-----------|
| GFP+         | 27      | 0.2467   | 0.0943  | 39,482     | 104.3     |
| living cells | 10,944  | 100.0000 | 38.2403 | 1,050      | 384.1     |

# BD FACSDiva 8.0

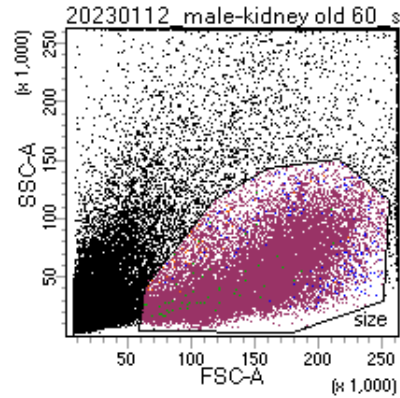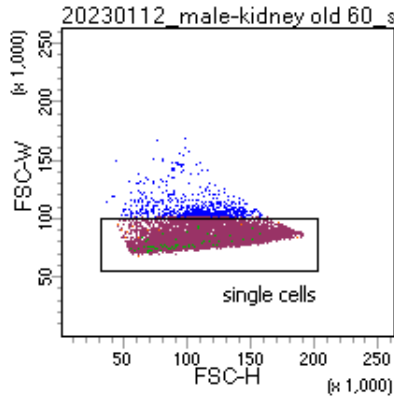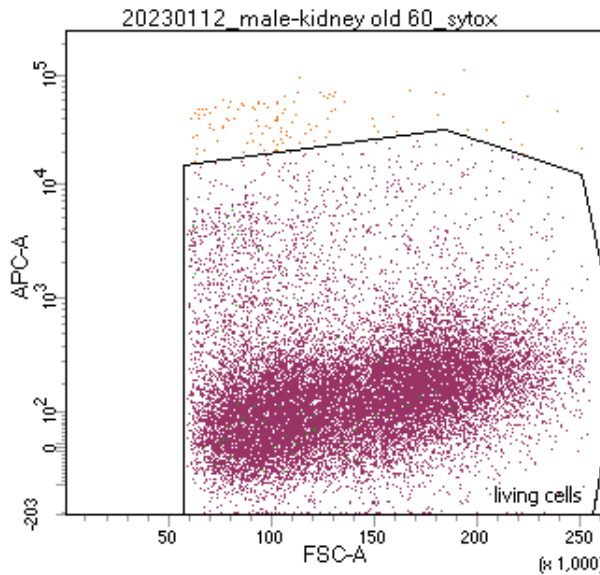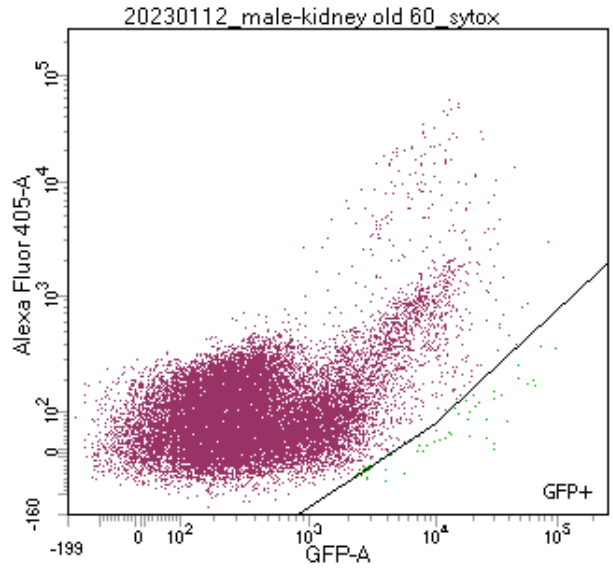

Tube: kidney old 60\_sytox

| Population   | #Events | %Parent | %Total |
|--------------|---------|---------|--------|
| All Events   | 52,205  | ####    | 100.0  |
| size         | 20,756  | 39.8    | 39.8   |
| single cells | 20,102  | 96.8    | 38.5   |
| living cells | 19,990  | 99.4    | 38.3   |
| GFP+         | 57      | 0.3     | 0.1    |

|                  |                        |
|------------------|------------------------|
| Experiment Name: | Johannes_Nothro kidney |
| Specimen Name:   | 20230112_male          |
| Tube Name:       | kidney old 60_sytox    |

  

| Population   | #Events | %Parent | %Total  | GFP-A Mean | GFP-A %CV |
|--------------|---------|---------|---------|------------|-----------|
| GFP+         | 57      | 0.2851  | 0.1092  | 18,954     | 109.5     |
| living cells | 19,990  | 99.4428 | 38.2914 | 934        | 289.1     |

# BD FACSDiva 8.0

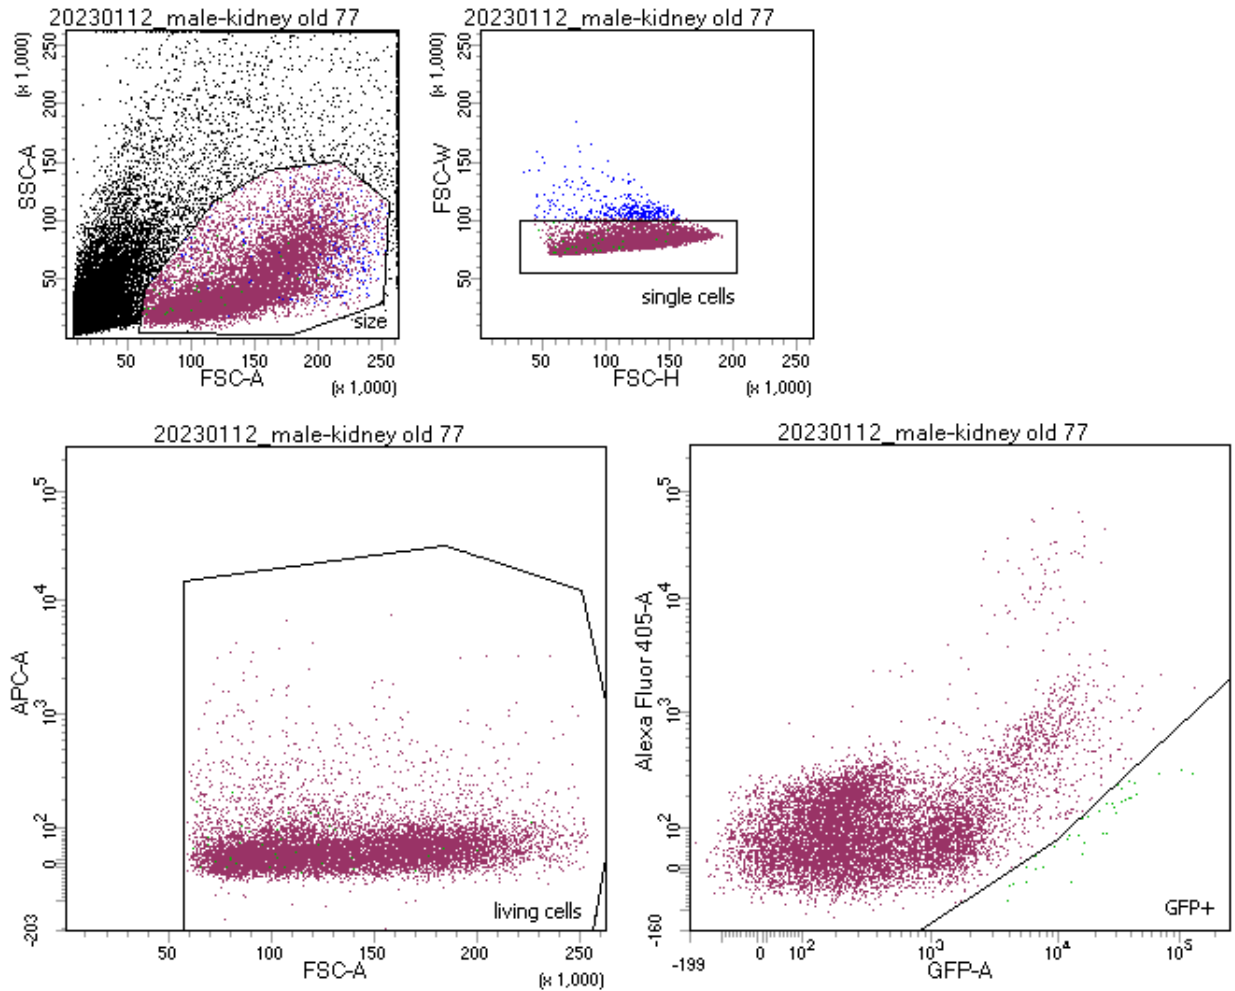

| Tube: kidney old 77 |         |         |        |
|---------------------|---------|---------|--------|
| Population          | #Events | %Parent | %Total |
| ■ All Events        | 32,601  | ####    | 100.0  |
| ■ size              | 11,300  | 34.7    | 34.7   |
| ■ single cells      | 10,941  | 96.8    | 33.6   |
| ■ living cells      | 10,941  | 100.0   | 33.6   |
| ■ GFP+              | 37      | 0.3     | 0.1    |

|                  |                        |
|------------------|------------------------|
| Experiment Name: | Johannes_Notheo kidney |
| Specimen Name:   | 20230112_male          |
| Tube Name:       | kidney old 77          |

  

| Population     | #Events | %Parent  | %Total  | GFP-A Mean | GFP-A %CV |
|----------------|---------|----------|---------|------------|-----------|
| ■ GFP+         | 37      | 0.3382   | 0.1135  | 27,165     | 100.3     |
| ■ living cells | 10,941  | 100.0000 | 33.5603 | 1,220      | 323.1     |

# BD FACSDiva 8.0

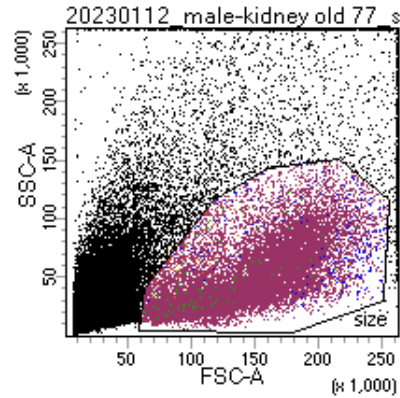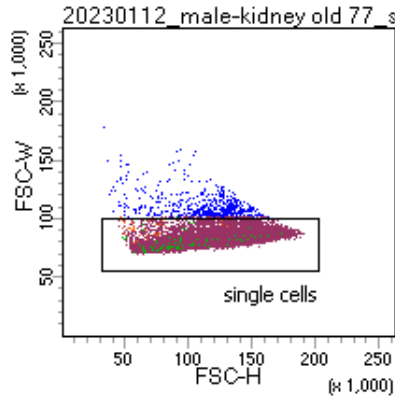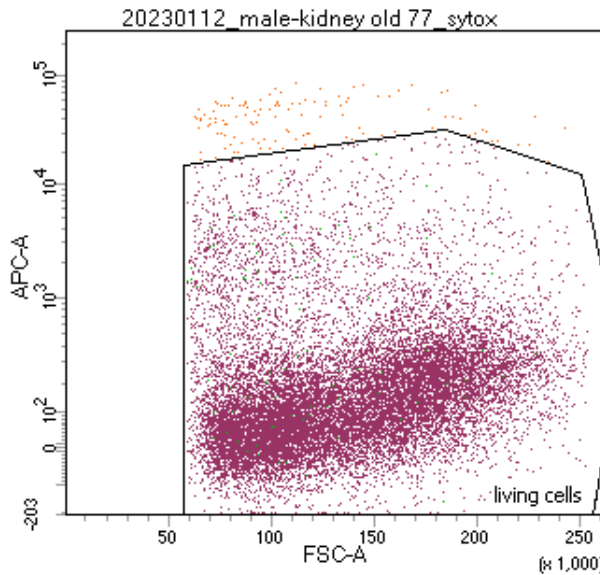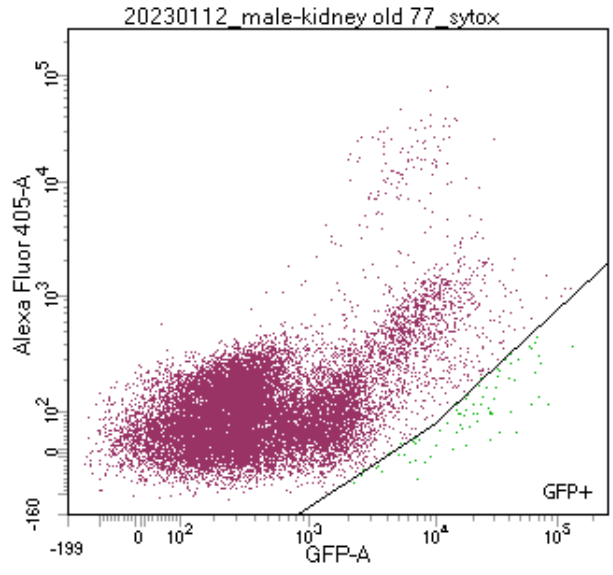

Tube: kidney old 77\_sytox

| Population   | #Events | %Parent | %Total |
|--------------|---------|---------|--------|
| All Events   | 52,348  | ####    | 100.0  |
| size         | 18,441  | 35.2    | 35.2   |
| single cells | 17,907  | 97.1    | 34.2   |
| living cells | 17,783  | 99.3    | 34.0   |
| GFP+         | 80      | 0.4     | 0.2    |

|                  |                        |
|------------------|------------------------|
| Experiment Name: | Johannes_Nothro kidney |
| Specimen Name:   | 20230112_male          |
| Tube Name:       | kidney old 77_sytox    |

  

| Population   | #Events | %Parent | %Total  | GFP-A Mean | GFP-A %CV |
|--------------|---------|---------|---------|------------|-----------|
| GFP+         | 80      | 0.4499  | 0.1528  | 26,827     | 88.2      |
| living cells | 17,783  | 99.3075 | 33.9707 | 1,266      | 322.5     |



# BD FACSDiva 8.0

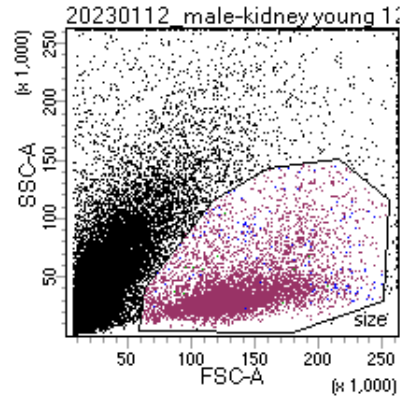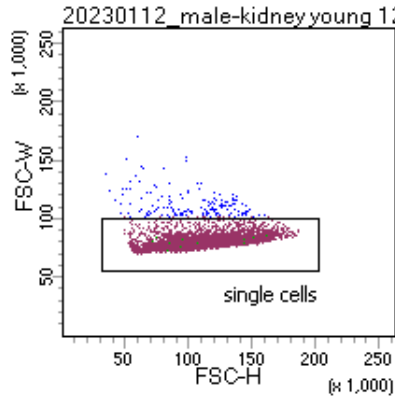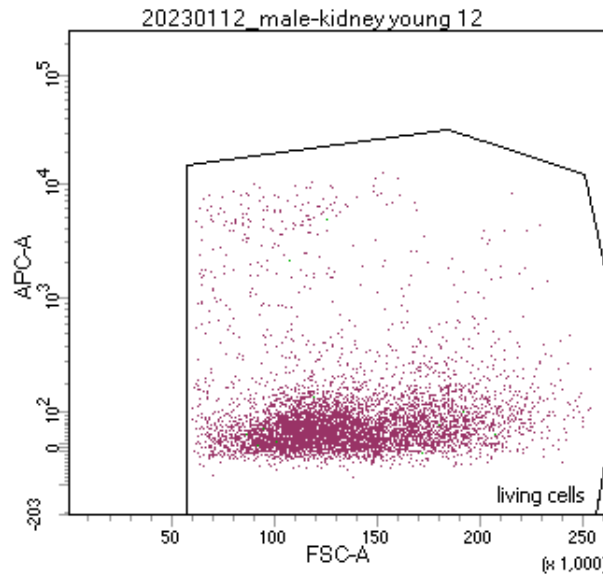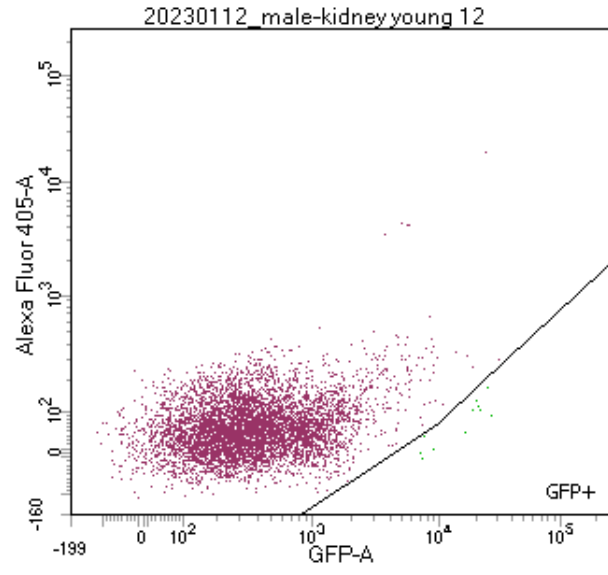

Tube: kidney young 12

| Population   | #Events | %Parent | %Total |
|--------------|---------|---------|--------|
| All Events   | 58,459  | ####    | 100.0  |
| size         | 5,972   | 10.2    | 10.2   |
| single cells | 5,813   | 97.3    | 9.9    |
| living cells | 5,813   | 100.0   | 9.9    |
| GFP+         | 11      | 0.2     | 0.0    |

|                  |                        |
|------------------|------------------------|
| Experiment Name: | Johannes_Notheo kidney |
| Specimen Name:   | 20230112_male          |
| Tube Name:       | kidney young 12        |

  

| Population   | #Events | %Parent  | %Total | GFP-A Mean | GFP-A %CV |
|--------------|---------|----------|--------|------------|-----------|
| GFP+         | 11      | 0.1892   | 0.0188 | 16,434     | 46.2      |
| living cells | 5,813   | 100.0000 | 9.9437 | 595        | 210.0     |

# BD FACSDiva 8.0

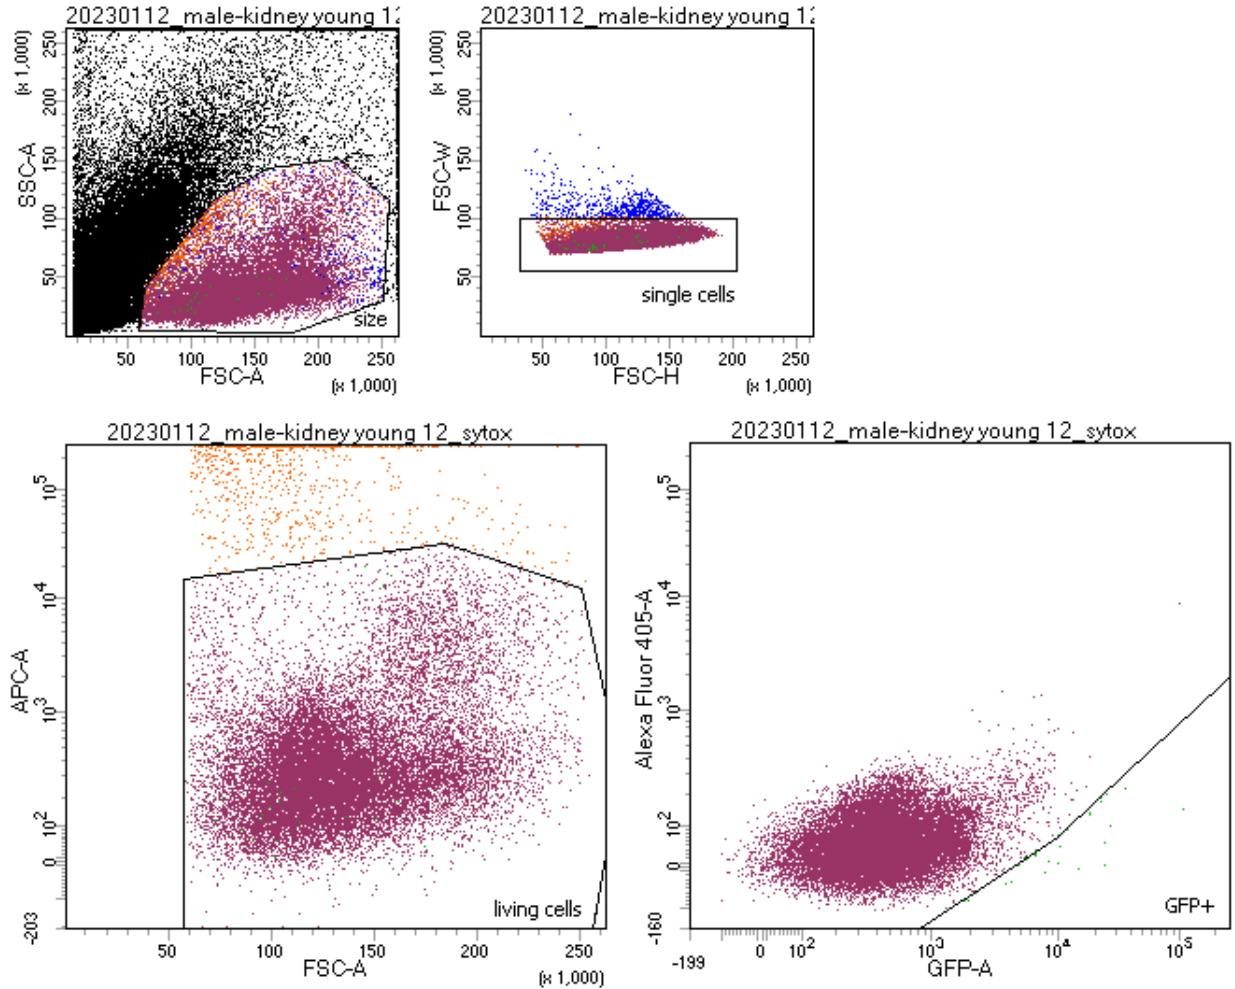

| Tube: kidney young 12_sytox |         |         |        |
|-----------------------------|---------|---------|--------|
| Population                  | #Events | %Parent | %Total |
| ■ All Events                | 210,179 | ####    | 100.0  |
| ■ size                      | 22,645  | 10.8    | 10.8   |
| ■ single cells              | 22,084  | 97.5    | 10.5   |
| ■ living cells              | 21,262  | 96.3    | 10.1   |
| ■ GFP+                      | 28      | 0.1     | 0.0    |

|                  |                        |
|------------------|------------------------|
| Experiment Name: | Johannes_Nothro kidney |
| Specimen Name:   | 20230112_male          |
| Tube Name:       | kidney young 12_sytox  |

  

| Population     | #Events | %Parent | %Total  | GFP-A Mean | GFP-A %CV |
|----------------|---------|---------|---------|------------|-----------|
| ■ GFP+         | 28      | 0.1317  | 0.0133  | 16,158     | 127.5     |
| ■ living cells | 21,262  | 96.2778 | 10.1161 | 644        | 220.3     |

# BD FACSDiva 8.0

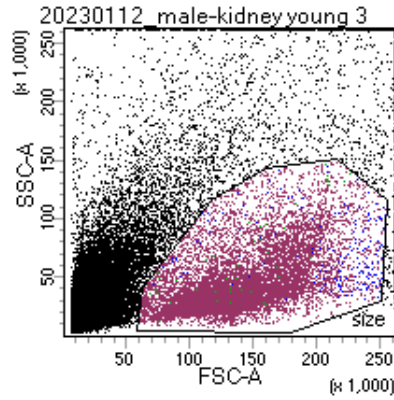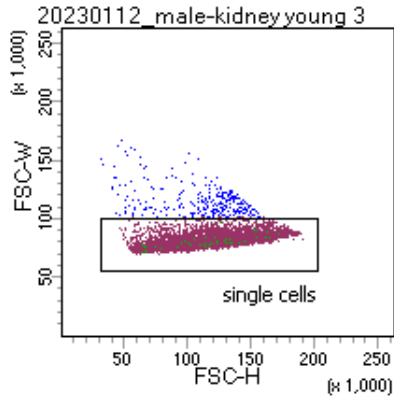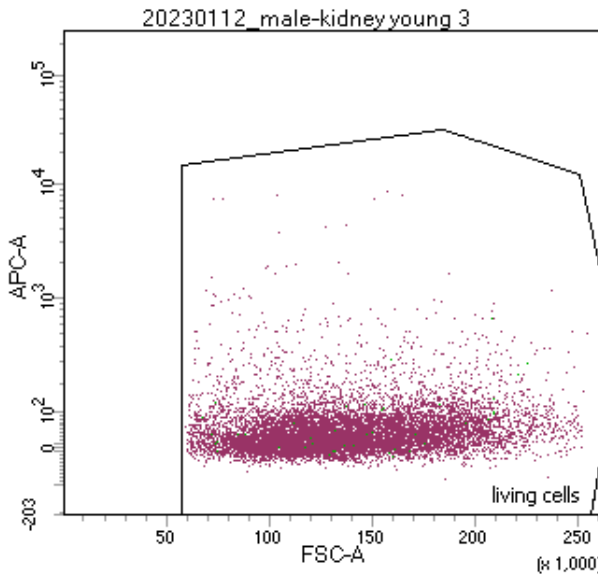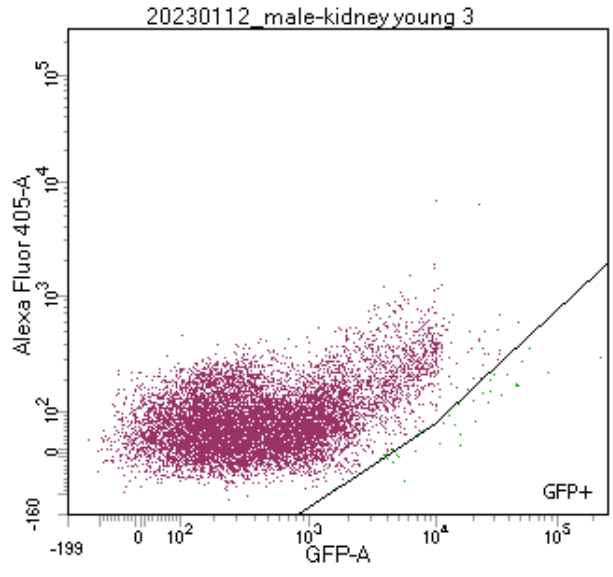

Tube: kidney young 3

| Population   | #Events | %Parent | %Total |
|--------------|---------|---------|--------|
| All Events   | 40,830  | ####    | 100.0  |
| size         | 10,994  | 26.9    | 26.9   |
| single cells | 10,711  | 97.4    | 26.2   |
| living cells | 10,711  | 100.0   | 26.2   |
| GFP+         | 41      | 0.4     | 0.1    |

|                  |                        |
|------------------|------------------------|
| Experiment Name: | Johannes_Notheo kidney |
| Specimen Name:   | 20230112_male          |
| Tube Name:       | kidney young 3         |

  

| Population   | #Events | %Parent  | %Total  | GFP-A Mean | GFP-A %CV |
|--------------|---------|----------|---------|------------|-----------|
| GFP+         | 41      | 0.3828   | 0.1004  | 25,651     | 150.5     |
| living cells | 10,711  | 100.0000 | 26.2332 | 1,067      | 321.0     |

# BD FACSDiva 8.0

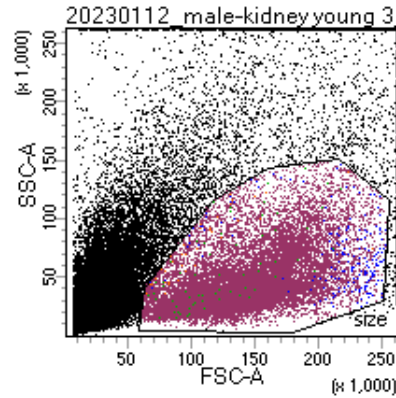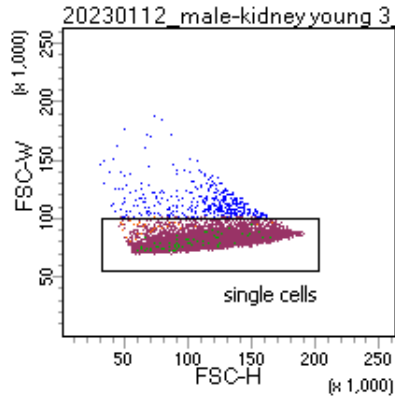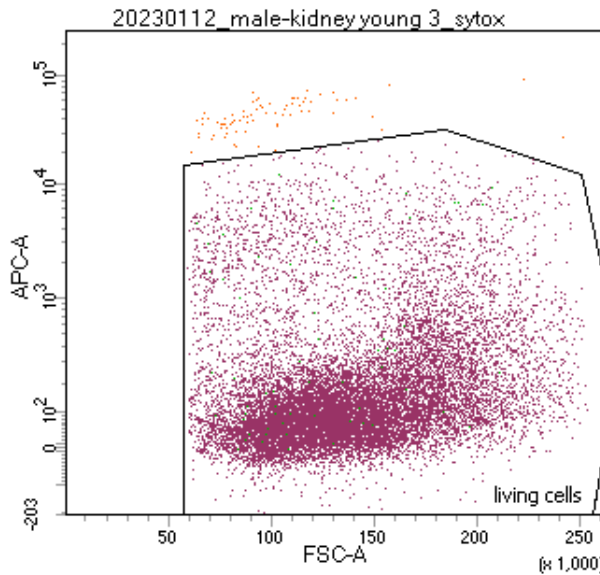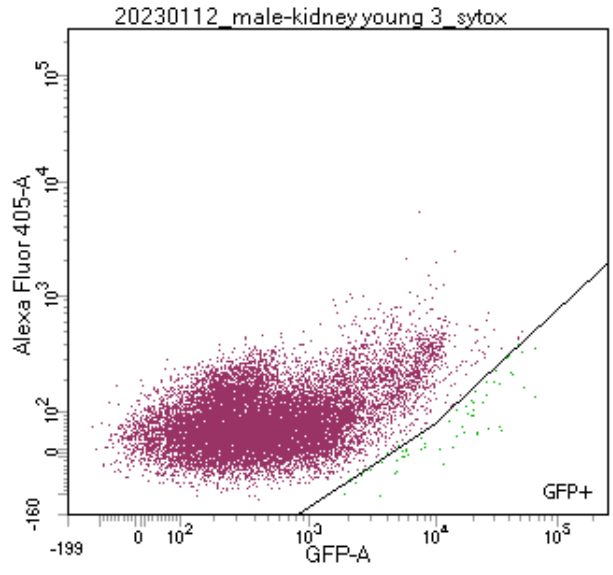

Tube: kidney young 3\_sytox

| Population     | #Events | %Parent | %Total |
|----------------|---------|---------|--------|
| ■ All Events   | 61,096  | ####    | 100.0  |
| ■ size         | 16,302  | 26.7    | 26.7   |
| ■ single cells | 15,904  | 97.6    | 26.0   |
| ■ living cells | 15,828  | 99.5    | 25.9   |
| ■ GFP+         | 64      | 0.4     | 0.1    |

|                  |                        |
|------------------|------------------------|
| Experiment Name: | Johannes_Notheo kidney |
| Specimen Name:   | 20230112_male          |
| Tube Name:       | kidney young 3_sytox   |

  

| Population     | #Events | %Parent | %Total  | GFP-A Mean | GFP-A %CV |
|----------------|---------|---------|---------|------------|-----------|
| ■ GFP+         | 64      | 0.4043  | 0.1048  | 18,021     | 90.9      |
| ■ living cells | 15,828  | 99.5221 | 25.9068 | 1,044      | 232.9     |

# BD FACSDiva 8.0

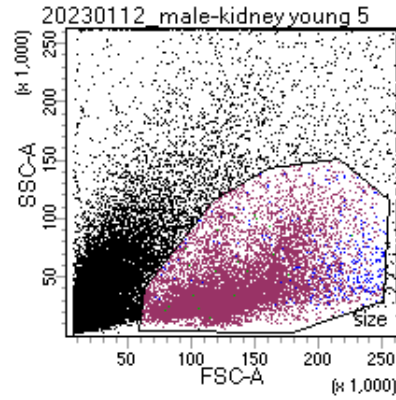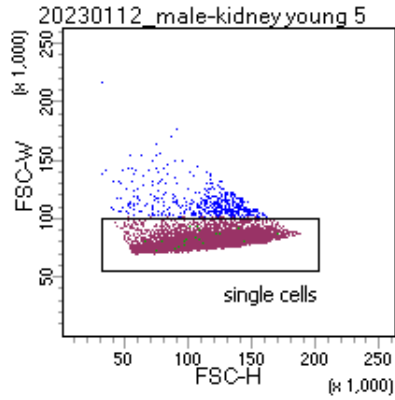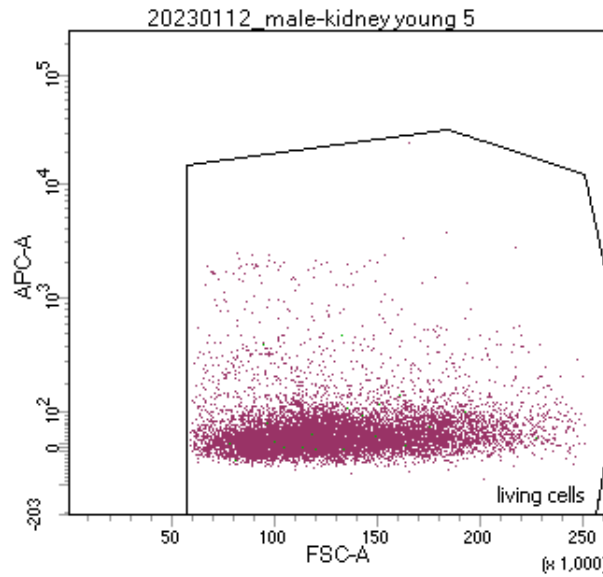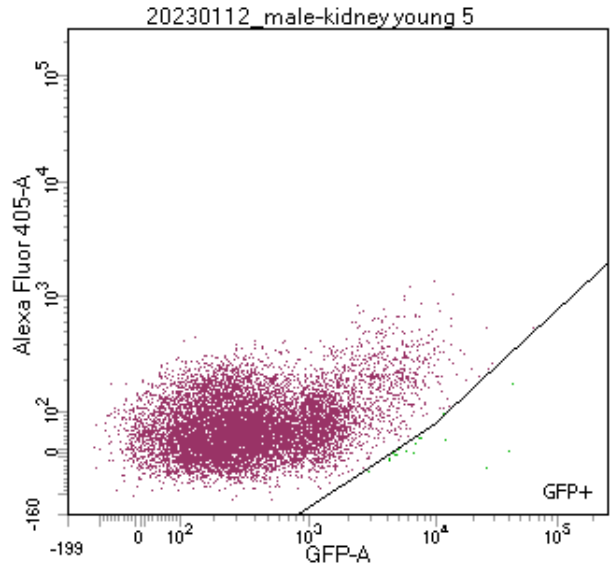

| Tube: kidney young 5 |         |         |        |
|----------------------|---------|---------|--------|
| Population           | #Events | %Parent | %Total |
| ■ All Events         | 42,323  | ####    | 100.0  |
| ■ size               | 11,112  | 26.3    | 26.3   |
| ■ single cells       | 10,644  | 95.8    | 25.1   |
| ■ living cells       | 10,644  | 100.0   | 25.1   |
| ■ GFP+               | 20      | 0.2     | 0.0    |

|                  |                        |
|------------------|------------------------|
| Experiment Name: | Johannes_Notheo kidney |
| Specimen Name:   | 20230112_male          |
| Tube Name:       | kidney young 5         |

  

| Population     | #Events | %Parent  | %Total  | GFP-A Mean | GFP-A %CV |
|----------------|---------|----------|---------|------------|-----------|
| ■ GFP+         | 20      | 0.1879   | 0.0473  | 11,098     | 106.1     |
| ■ living cells | 10,644  | 100.0000 | 25.1494 | 713        | 222.2     |

# BD FACSDiva 8.0

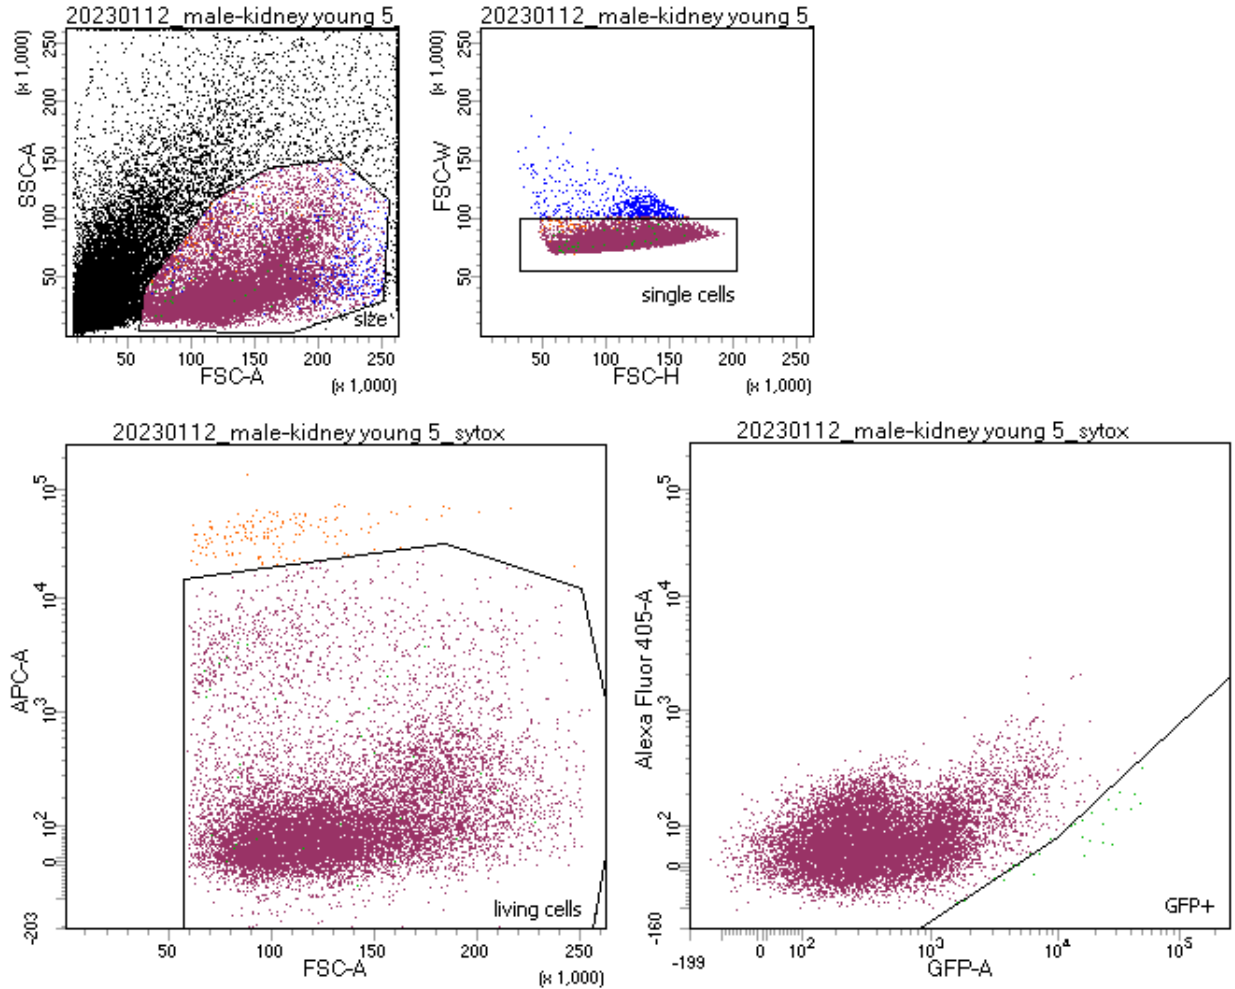

| Tube: kidney young 5_sytox |         |         |        |
|----------------------------|---------|---------|--------|
| Population                 | #Events | %Parent | %Total |
| ■ All Events               | 58,062  | ####    | 100.0  |
| ■ size                     | 15,082  | 26.0    | 26.0   |
| ■ single cells             | 14,499  | 96.1    | 25.0   |
| ■ living cells             | 14,348  | 99.0    | 24.7   |
| ■ GFP+                     | 33      | 0.2     | 0.1    |

|                  |                        |
|------------------|------------------------|
| Experiment Name: | Johannes_Nothro kidney |
| Specimen Name:   | 20230112_male          |
| Tube Name:       | kidney young 5_sytox   |

  

| Population     | #Events | %Parent | %Total  | GFP-A Mean | GFP-A %CV |
|----------------|---------|---------|---------|------------|-----------|
| ■ GFP+         | 33      | 0.2300  | 0.0568  | 17,701     | 79.8      |
| ■ living cells | 14,348  | 98.9585 | 24.7115 | 738        | 223.2     |



# BD FACSDiva 8.0

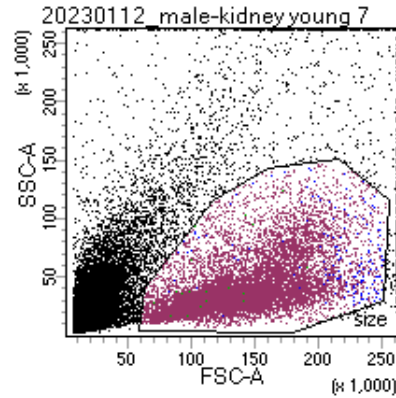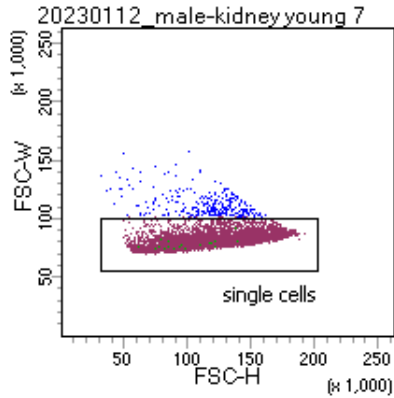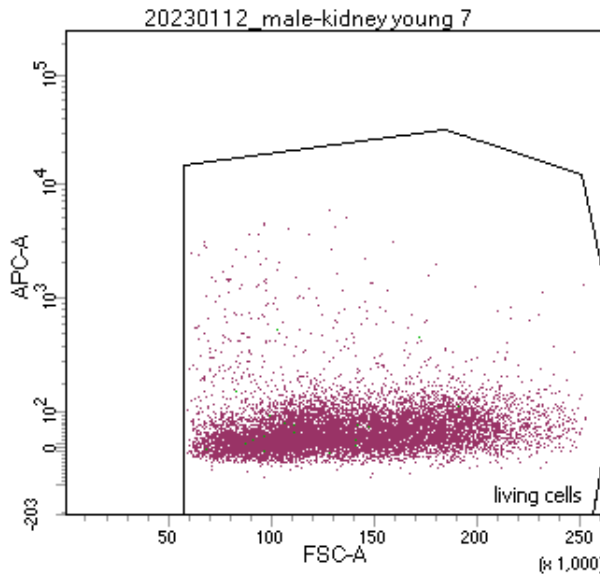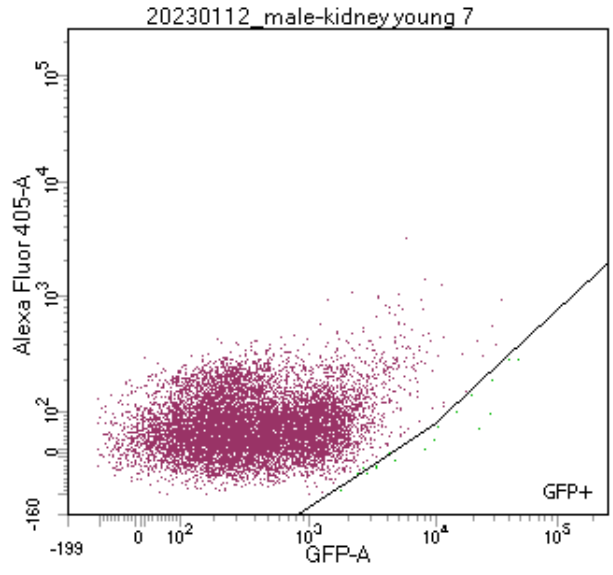

| Tube: kidney young 7 |         |         |        |
|----------------------|---------|---------|--------|
| Population           | #Events | %Parent | %Total |
| ■ All Events         | 30,663  | ####    | 100.0  |
| ■ size               | 10,932  | 35.7    | 35.7   |
| ■ single cells       | 10,641  | 97.3    | 34.7   |
| ■ living cells       | 10,641  | 100.0   | 34.7   |
| ■ GFP+               | 18      | 0.2     | 0.1    |

|                  |                        |
|------------------|------------------------|
| Experiment Name: | Johannes_Notheo kidney |
| Specimen Name:   | 20230112_male          |
| Tube Name:       | kidney young 7         |

  

| Population     | #Events | %Parent  | %Total  | GFP-A Mean | GFP-A %CV |
|----------------|---------|----------|---------|------------|-----------|
| ■ GFP+         | 18      | 0.1692   | 0.0587  | 14,122     | 99.6      |
| ■ living cells | 10,641  | 100.0000 | 34.7031 | 652        | 198.7     |

# BD FACSDiva 8.0

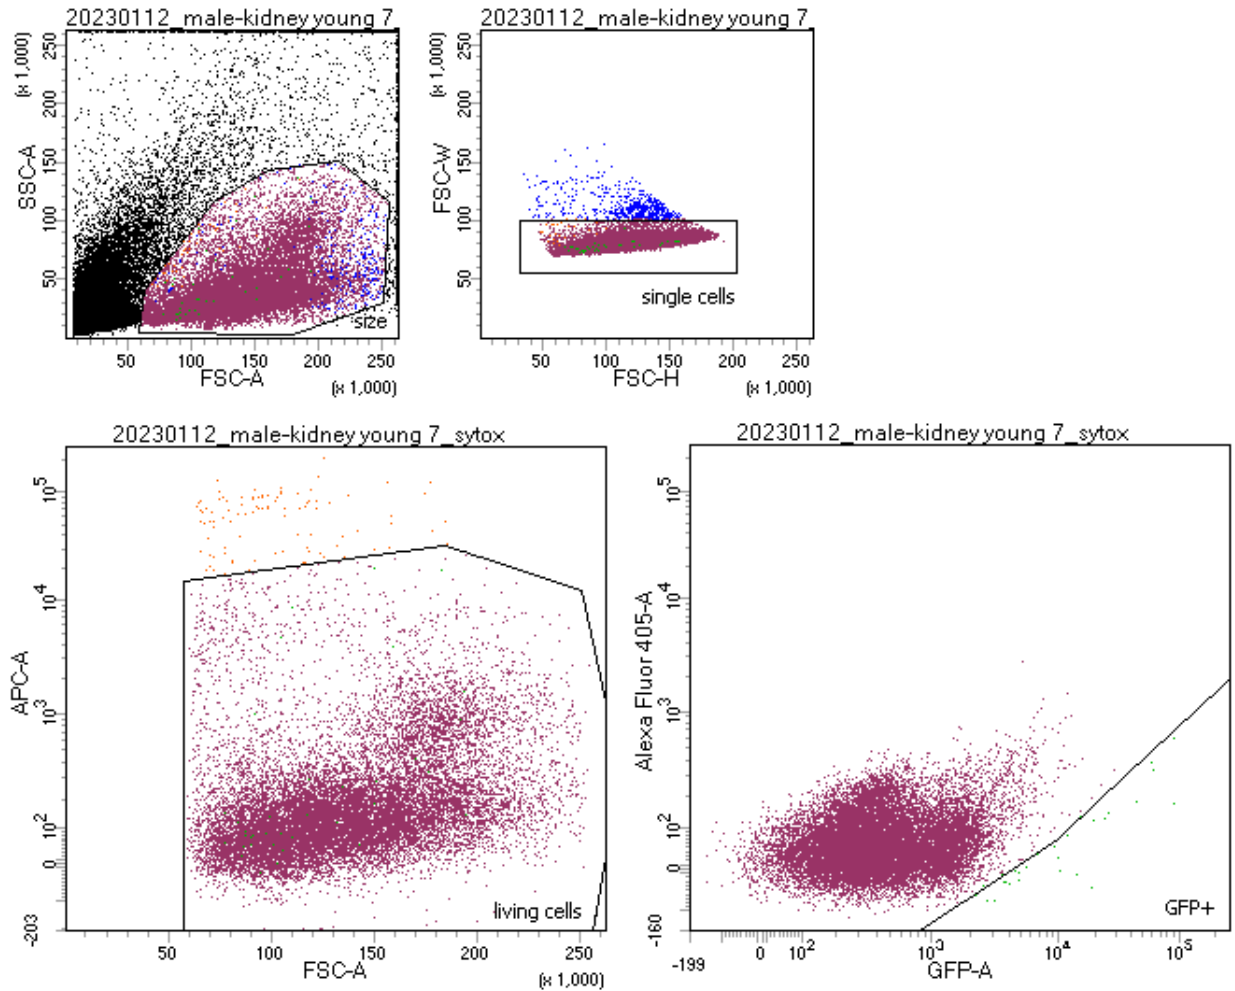

| Tube: kidney young 7_sytox |         |         |        |
|----------------------------|---------|---------|--------|
| Population                 | #Events | %Parent | %Total |
| ■ All Events               | 52,491  | ####    | 100.0  |
| ■ size                     | 18,095  | 34.5    | 34.5   |
| ■ single cells             | 17,562  | 97.1    | 33.5   |
| ■ living cells             | 17,461  | 99.4    | 33.3   |
| ■ GFP+                     | 36      | 0.2     | 0.1    |

|                  |                        |
|------------------|------------------------|
| Experiment Name: | Johannes_Notheo kidney |
| Specimen Name:   | 20230112_male          |
| Tube Name:       | kidney young 7_sytox   |

  

| Population     | #Events | %Parent | %Total  | GFP-A Mean | GFP-A %CV |
|----------------|---------|---------|---------|------------|-----------|
| ■ GFP+         | 36      | 0.2062  | 0.0686  | 16,218     | 146.6     |
| ■ living cells | 17,461  | 99.4249 | 33.2648 | 700        | 222.8     |

# BD FACSDiva 8.0

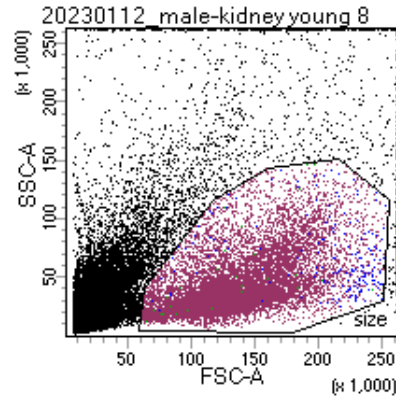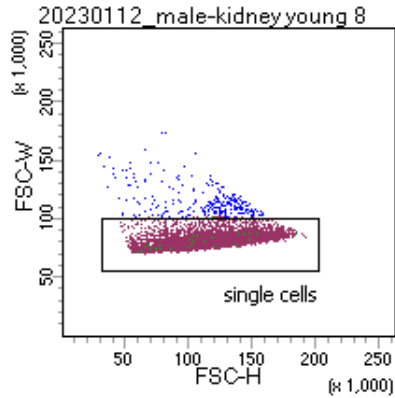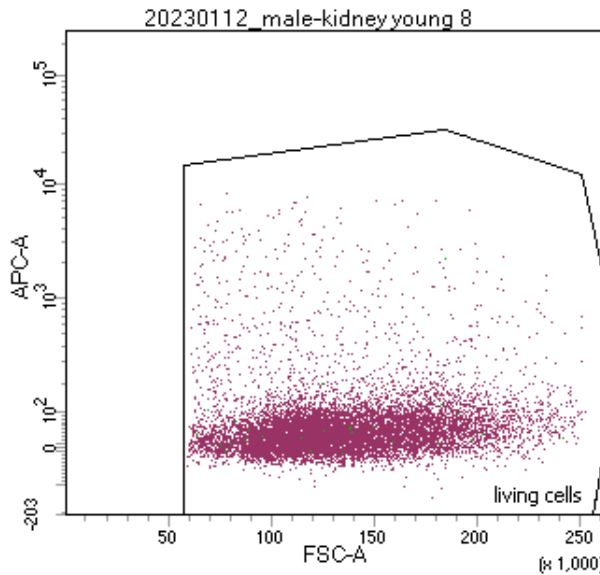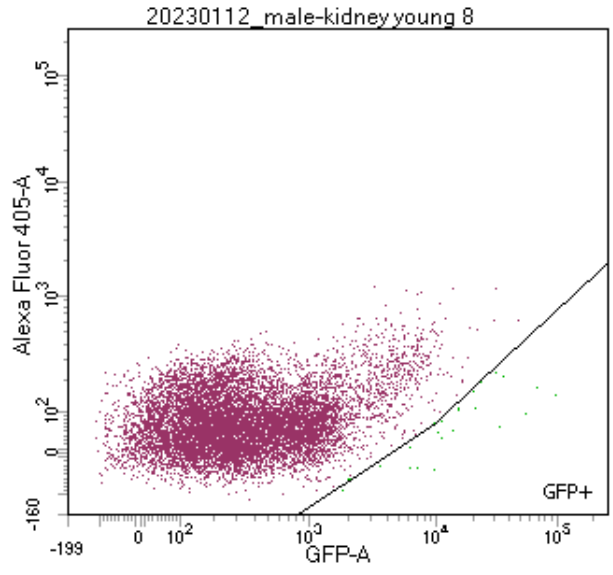

| Tube: kidney young 8 |         |         |        |
|----------------------|---------|---------|--------|
| Population           | #Events | %Parent | %Total |
| ■ All Events         | 38,263  | ####    | 100.0  |
| ■ size               | 11,133  | 29.1    | 29.1   |
| ■ single cells       | 10,851  | 97.5    | 28.4   |
| ■ living cells       | 10,851  | 100.0   | 28.4   |
| ■ GFP+               | 26      | 0.2     | 0.1    |

|                  |                        |
|------------------|------------------------|
| Experiment Name: | Johannes_Notheo kidney |
| Specimen Name:   | 20230112_male          |
| Tube Name:       | kidney young 8         |

  

| Population     | #Events | %Parent  | %Total  | GFP-A Mean | GFP-A %CV |
|----------------|---------|----------|---------|------------|-----------|
| ■ GFP+         | 26      | 0.2396   | 0.0680  | 20,484     | 111.3     |
| ■ living cells | 10,851  | 100.0000 | 28.3590 | 682        | 288.9     |

# BD FACSDiva 8.0

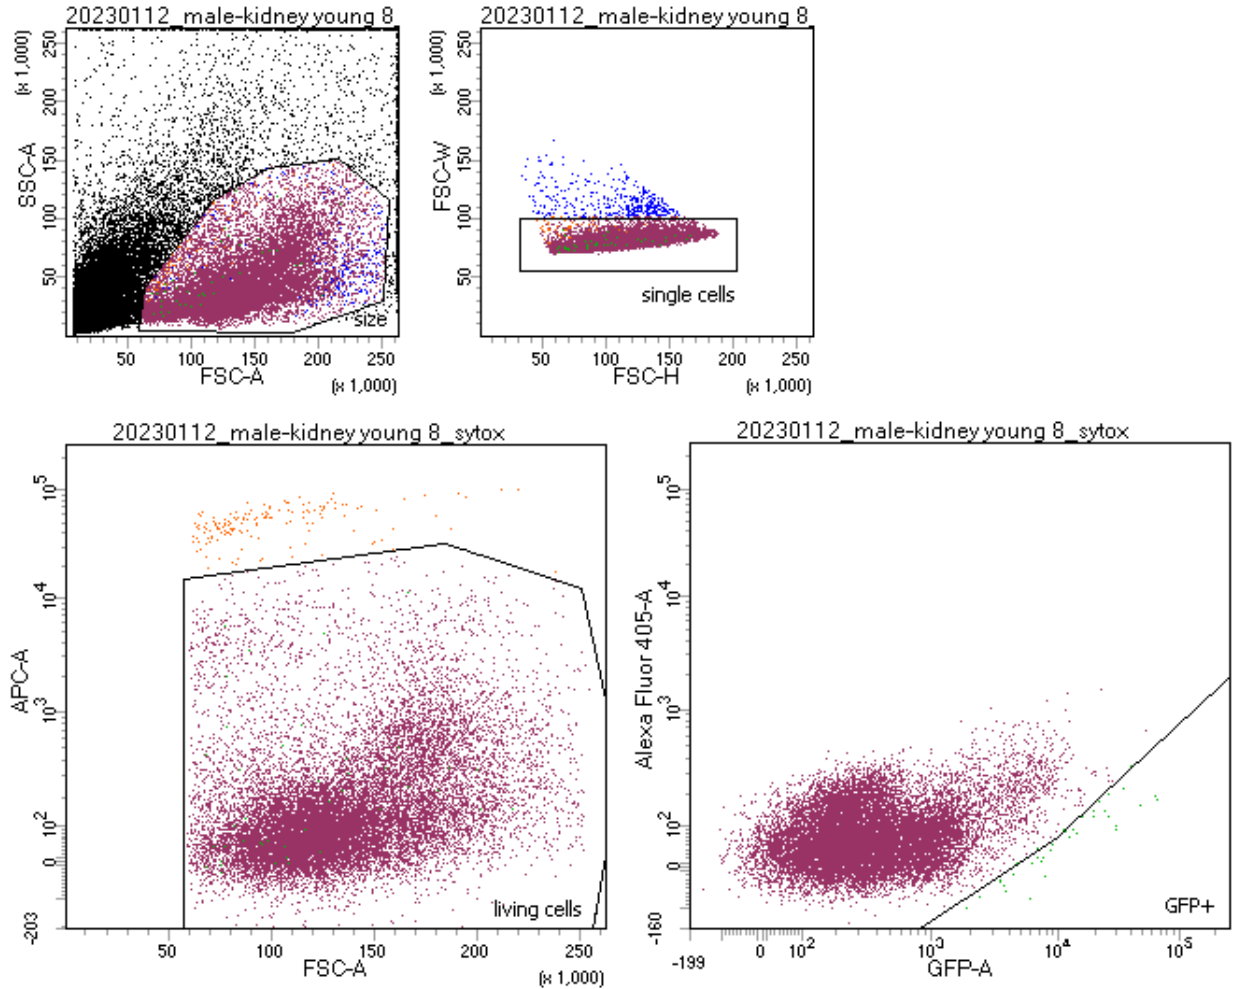

| Tube: kidney young 8_sytox |         |         |        |
|----------------------------|---------|---------|--------|
| Population                 | #Events | %Parent | %Total |
| ■ All Events               | 58,074  | ####    | 100.0  |
| ■ size                     | 16,650  | 28.7    | 28.7   |
| ■ single cells             | 16,247  | 97.6    | 28.0   |
| ■ living cells             | 16,097  | 99.1    | 27.7   |
| ■ GFP+                     | 42      | 0.3     | 0.1    |

|                  |                        |
|------------------|------------------------|
| Experiment Name: | Johannes_Notheo kidney |
| Specimen Name:   | 20230112_male          |
| Tube Name:       | kidney young 8_sytox   |

  

| Population     | #Events | %Parent | %Total  | GFP-A Mean | GFP-A %CV |
|----------------|---------|---------|---------|------------|-----------|
| ■ GFP+         | 42      | 0.2609  | 0.0723  | 16,552     | 95.3      |
| ■ living cells | 16,097  | 99.0768 | 27.7181 | 707        | 248.9     |
