# Supplementary material for: Generation of a transparent killifish line through multiplex CRISPR/Cas9mediated gene inactivation
Source: eLife journal article supplement (doi:10.7554/elife.81549), 2023-02-23
Supplement: fig5-data1 [file elife-81549-fig5-data1-v3.zip]

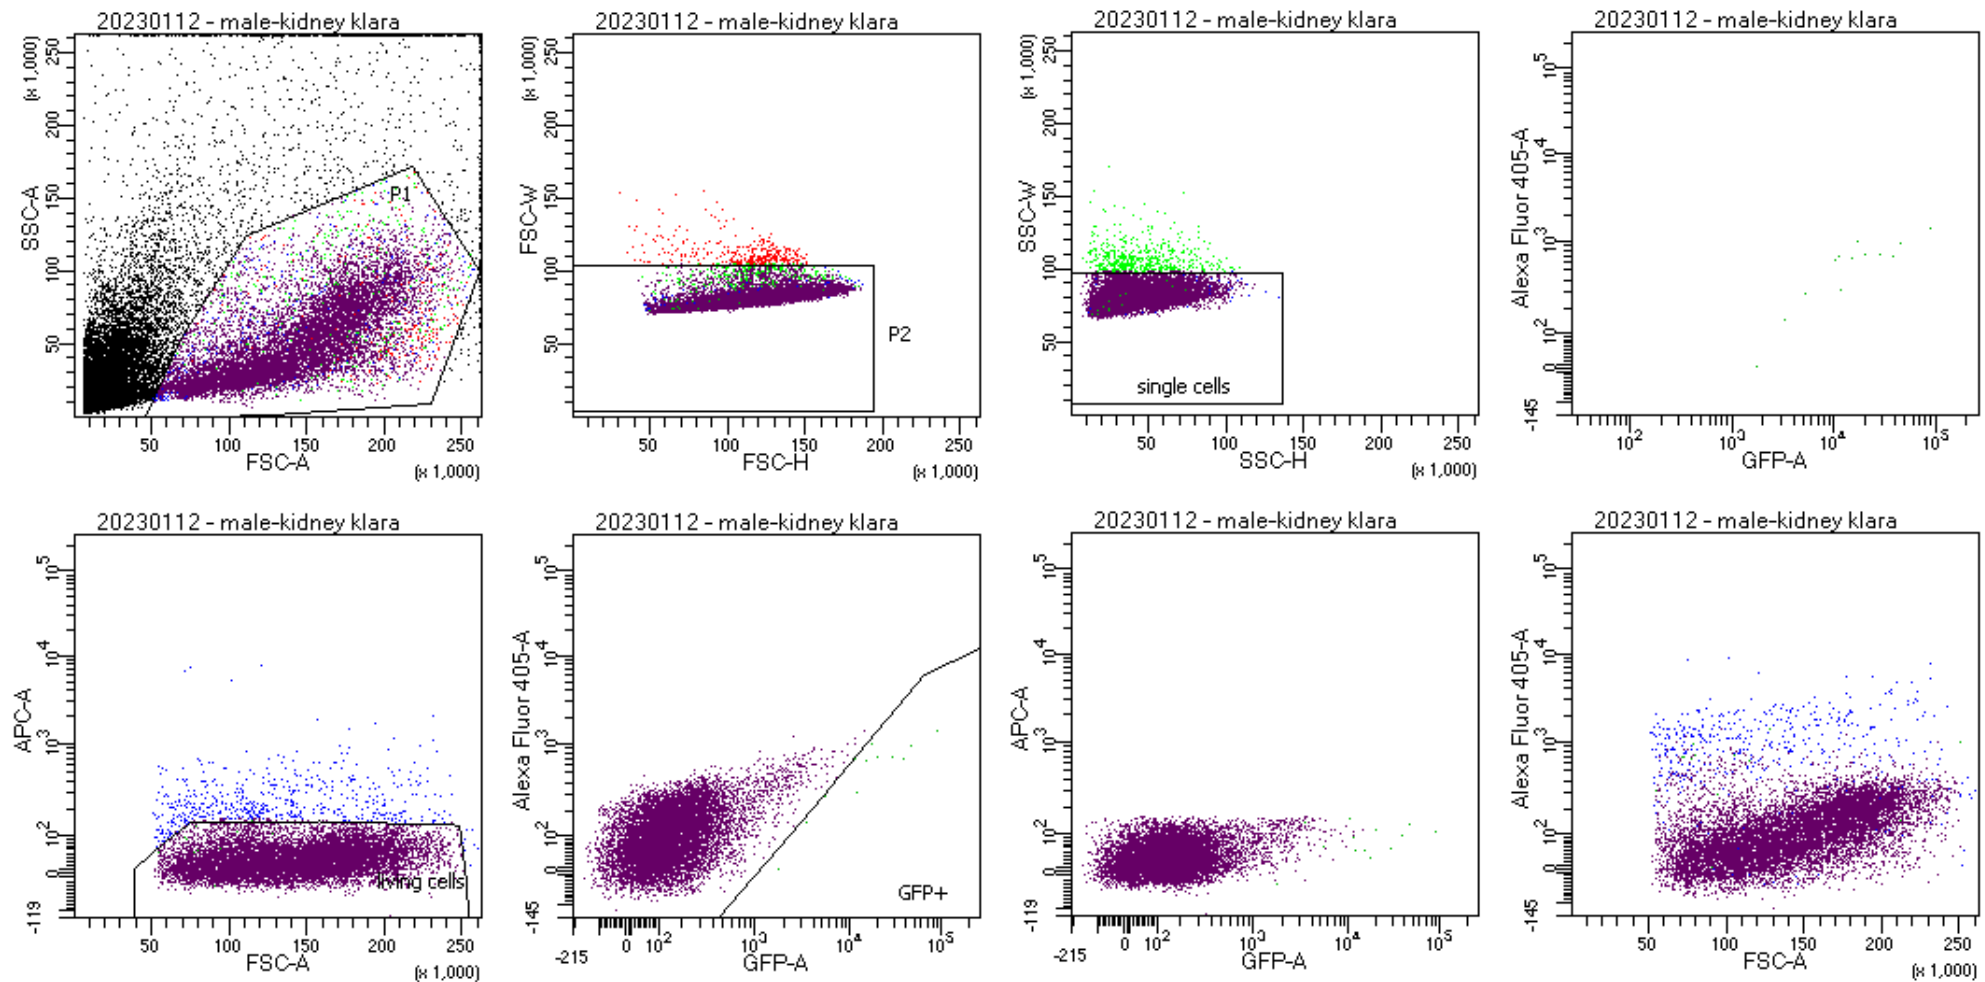

Tube: kidney klara

| Population   | #Events | %Parent | %Total |
|--------------|---------|---------|--------|
| All Events   | 29,598  | ####    | 100.0  |
| P1           | 11,384  | 38.5    | 38.5   |
| P2           | 11,030  | 96.9    | 37.3   |
| single cells | 10,522  | 95.4    | 35.5   |
| living cells | 10,000  | 95.0    | 33.8   |
| GFP+         | 13      | 0.1     | 0.0    |

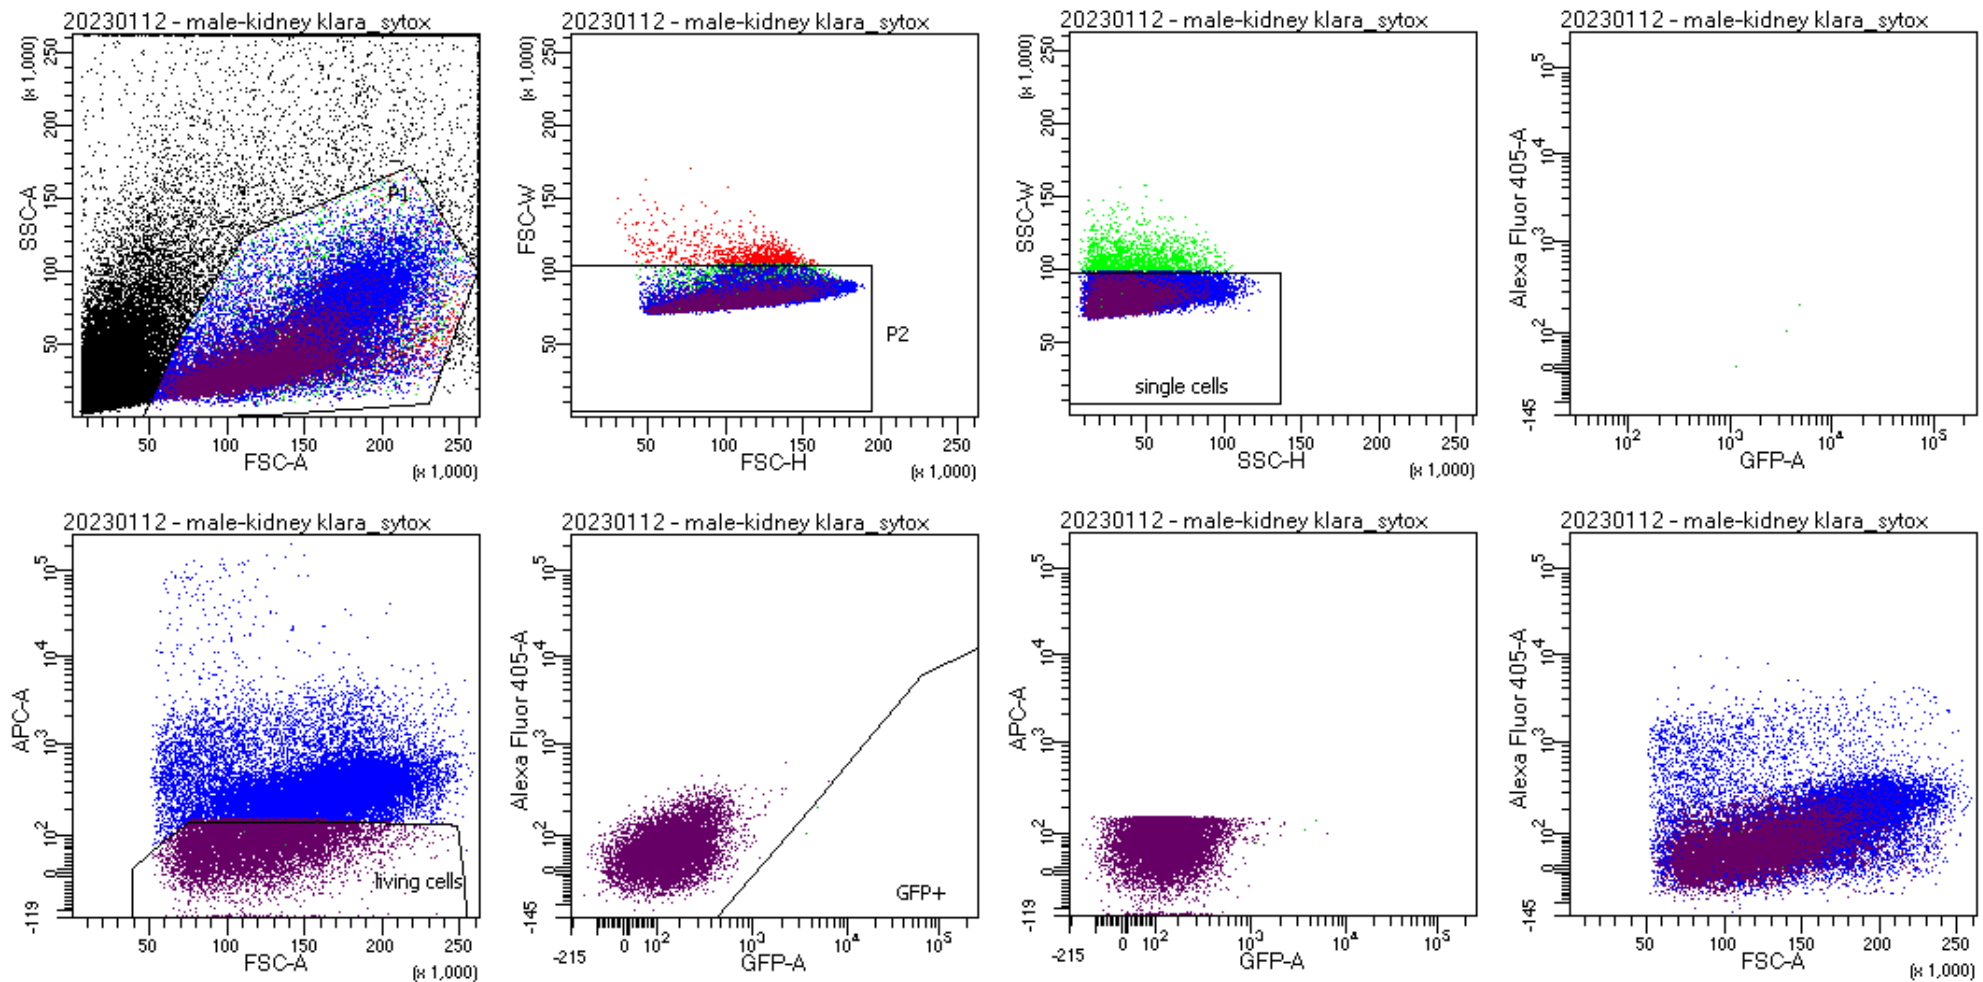

Tube: kidney klara\_sytox

| Population   | #Events | %Parent | %Total |
|--------------|---------|---------|--------|
| All Events   | 83,100  | ####    | 100.0  |
| P1           | 32,230  | 38.8    | 38.8   |
| P2           | 31,177  | 96.7    | 37.5   |
| single cells | 29,477  | 94.5    | 35.5   |
| living cells | 10,000  | 33.9    | 12.0   |
| GFP+         | 3       | 0.0     | 0.0    |

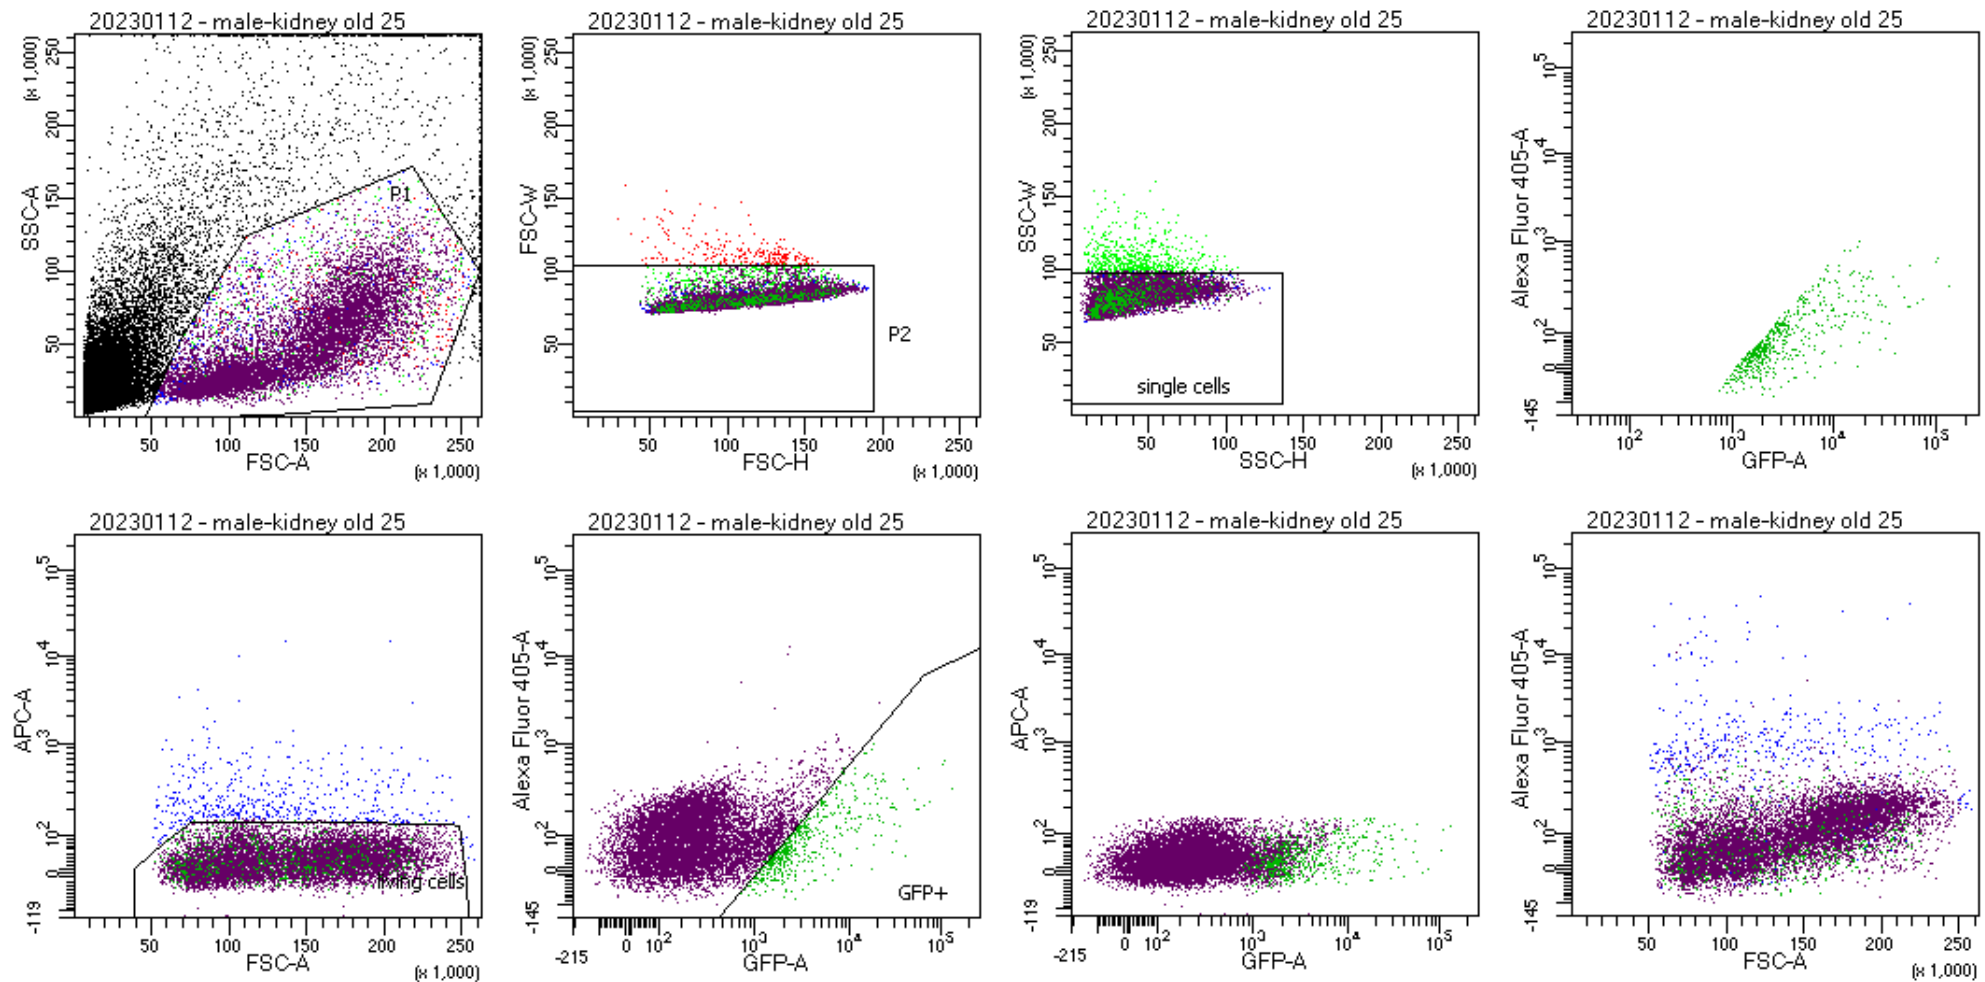

Tube: kidney old 25

| Population   | #Events | %Parent | %Total |
|--------------|---------|---------|--------|
| All Events   | 30,409  | ####    | 100.0  |
| P1           | 11,282  | 37.1    | 37.1   |
| P2           | 11,041  | 97.9    | 36.3   |
| single cells | 10,486  | 95.0    | 34.5   |
| living cells | 10,000  | 95.4    | 32.9   |
| GFP+         | 529     | 5.3     | 1.7    |

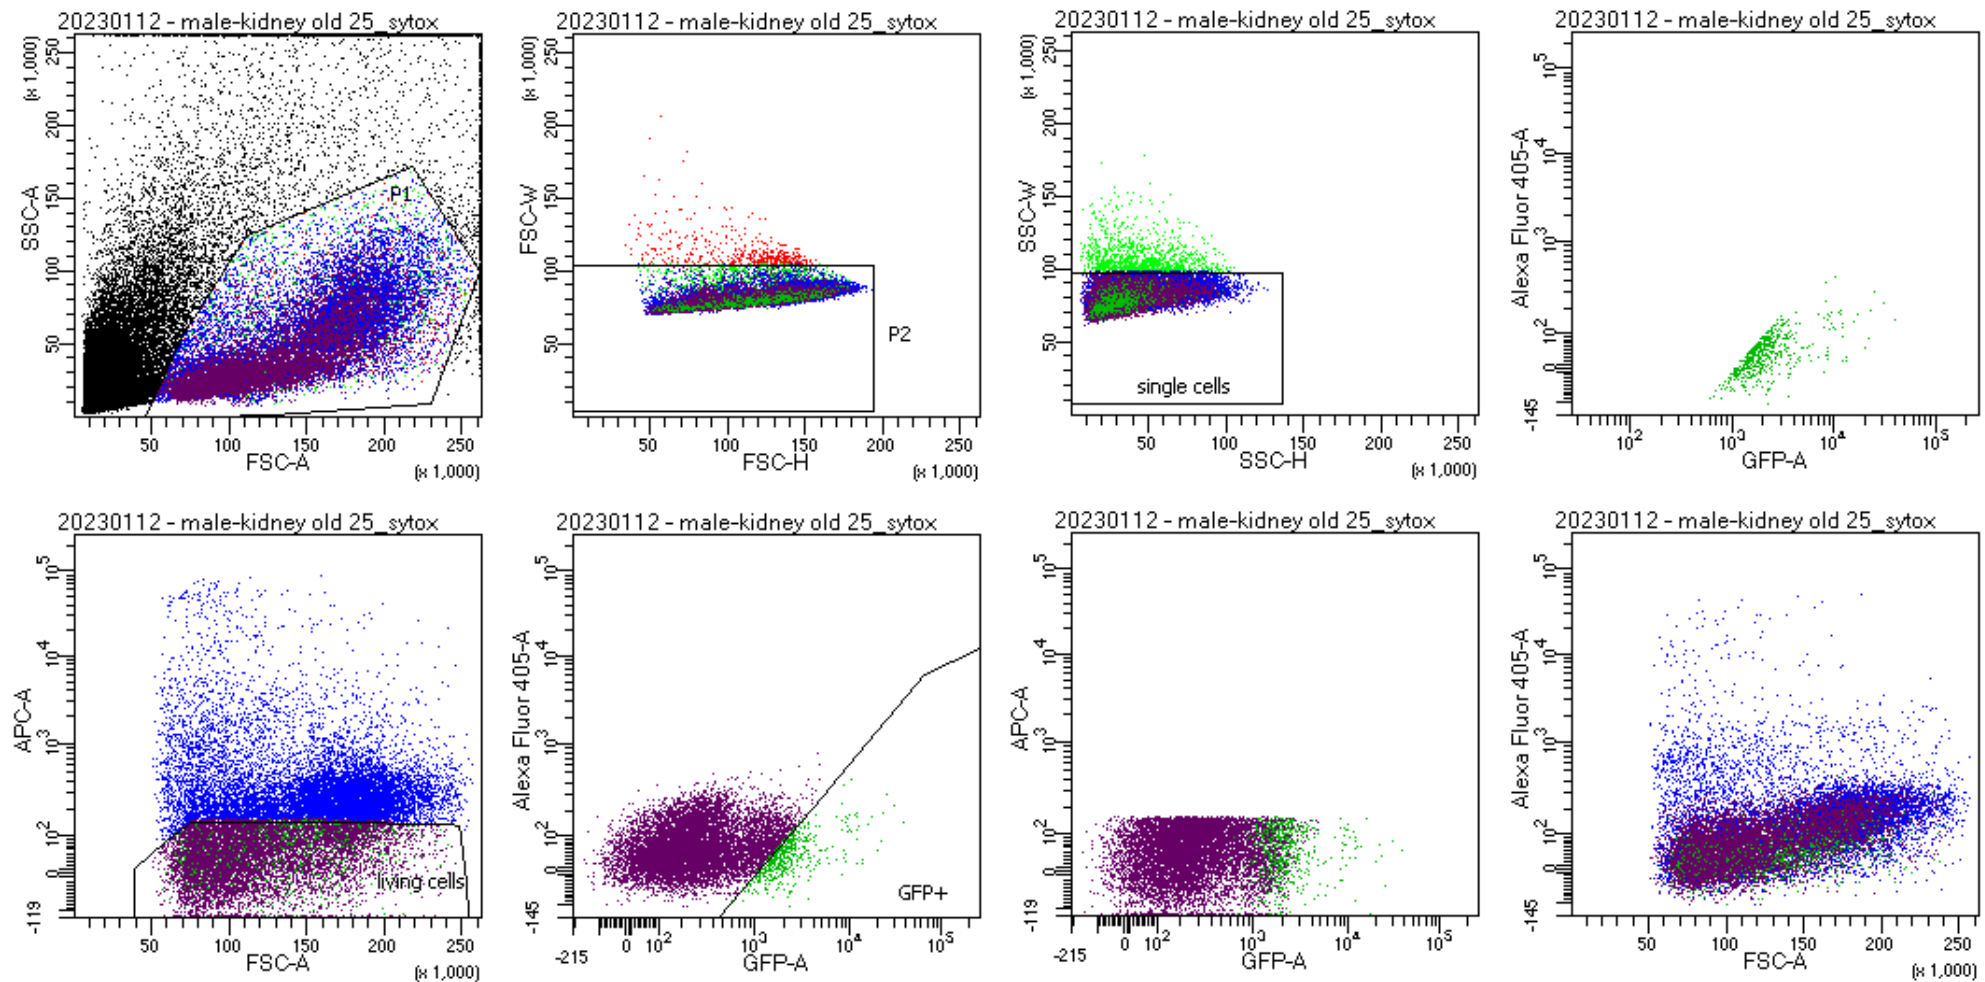

Tube: kidney old 25\_sytox

| Population   | #Events | %Parent | %Total |
|--------------|---------|---------|--------|
| All Events   | 59,388  | ####    | 100.0  |
| P1           | 21,528  | 36.2    | 36.2   |
| P2           | 21,111  | 98.1    | 35.5   |
| single cells | 20,017  | 94.8    | 33.7   |
| living cells | 10,000  | 50.0    | 16.8   |
| GFP+         | 530     | 5.3     | 0.9    |

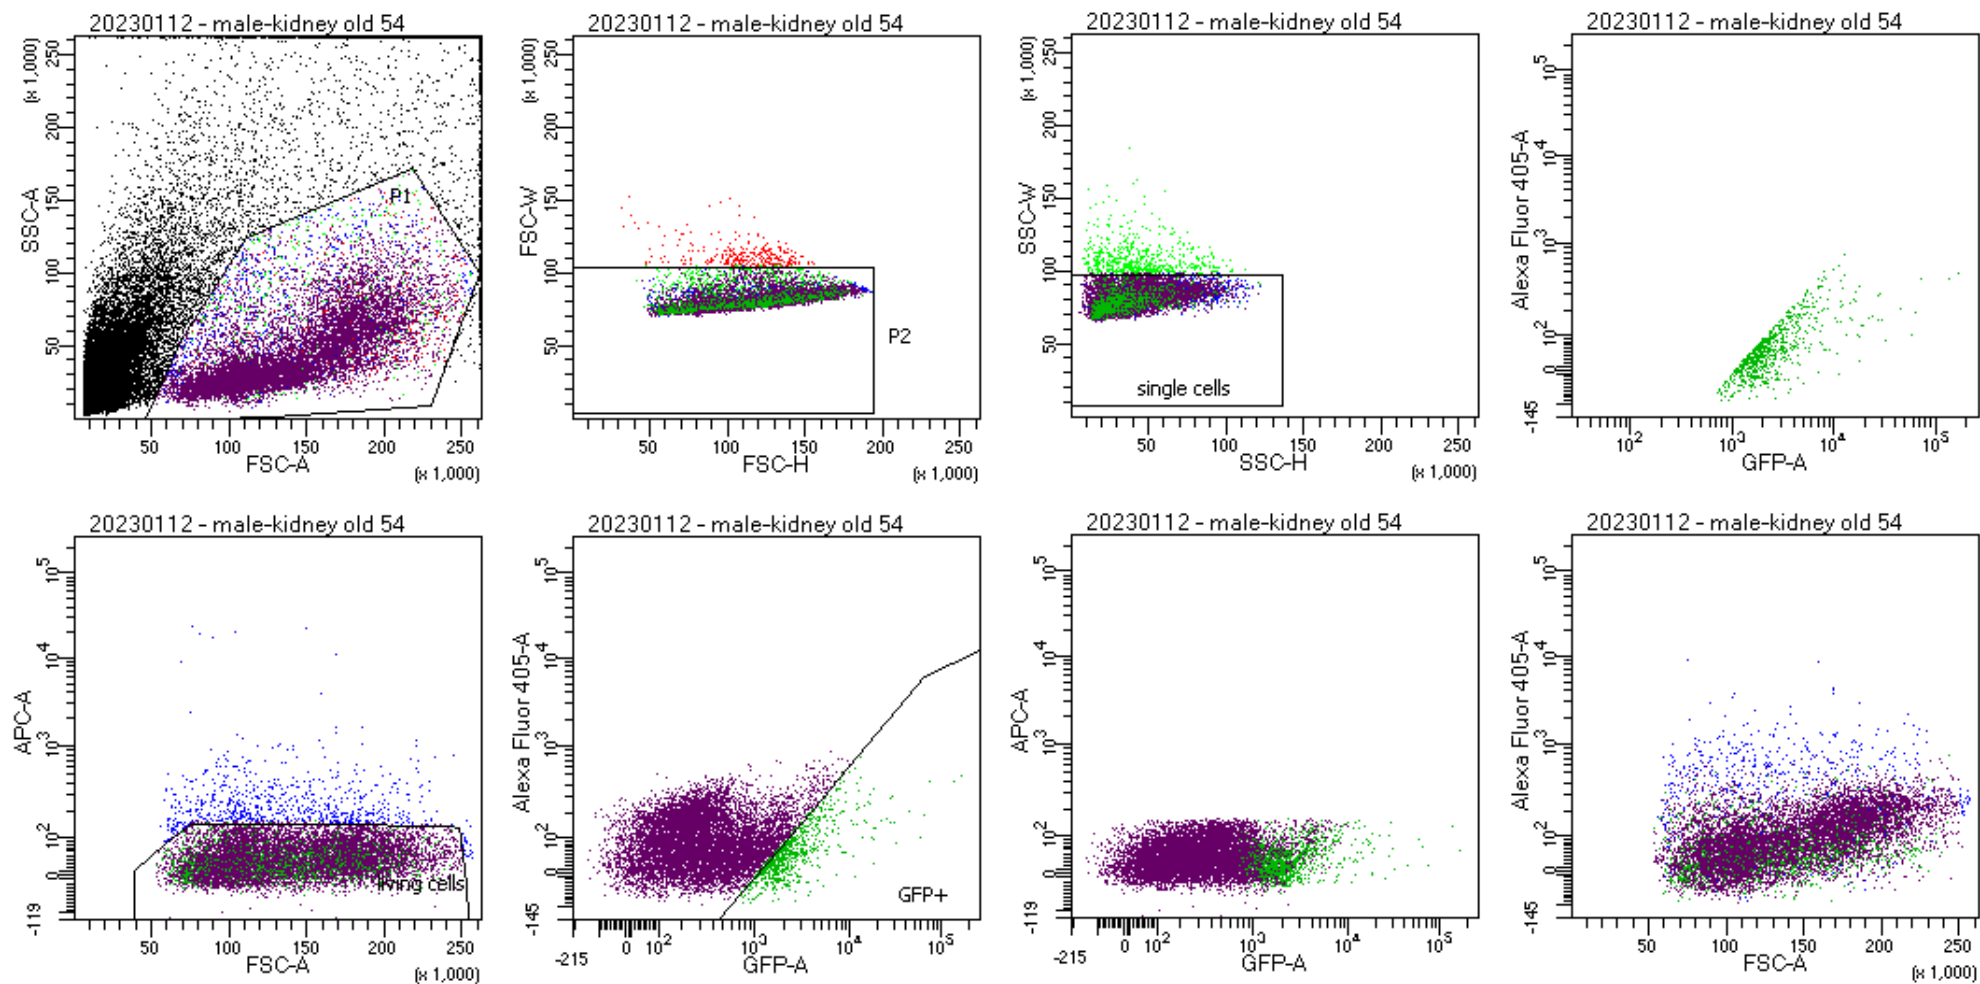

Tube: kidney old 54

| Population   | #Events | %Parent | %Total |
|--------------|---------|---------|--------|
| All Events   | 33,047  | ####    | 100.0  |
| P1           | 11,589  | 35.1    | 35.1   |
| P2           | 11,301  | 97.5    | 34.2   |
| single cells | 10,709  | 94.8    | 32.4   |
| living cells | 10,000  | 93.4    | 30.3   |
| GFP+         | 746     | 7.5     | 2.3    |



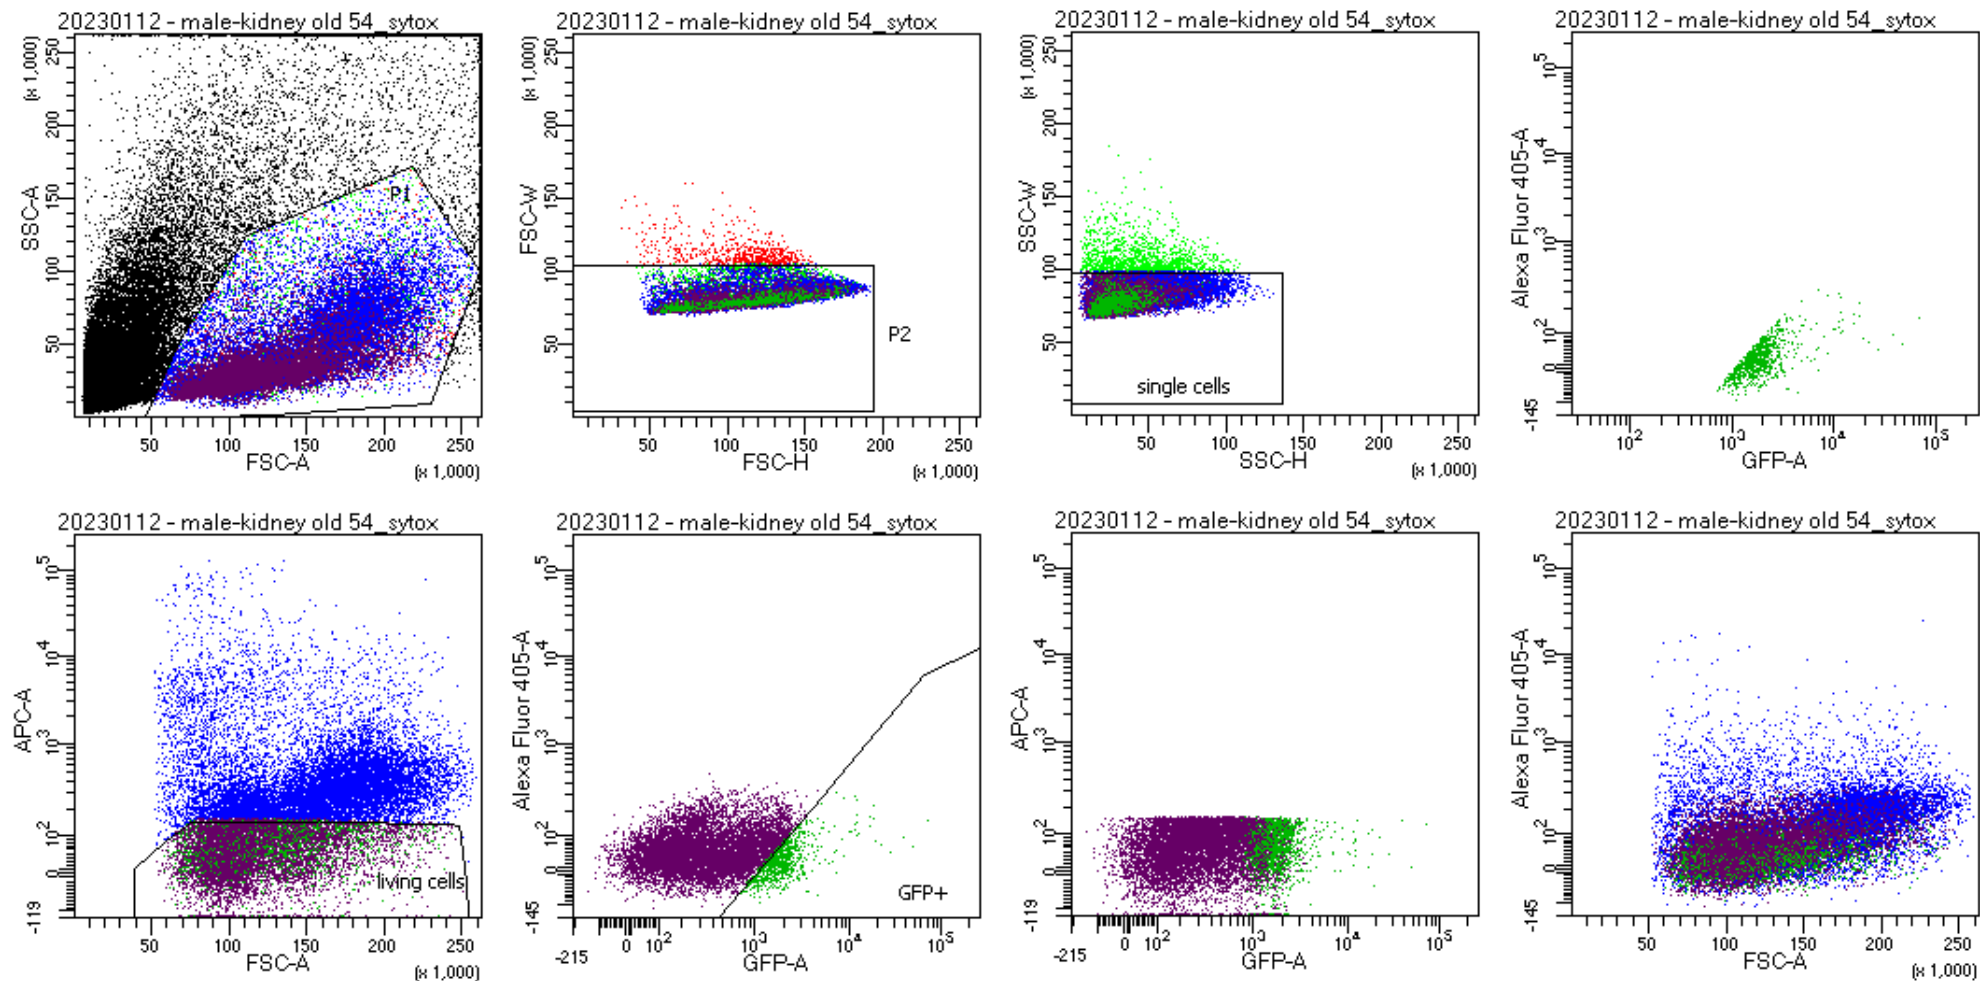

Tube: kidney old 54\_sytox

| Population   | #Events | %Parent | %Total |
|--------------|---------|---------|--------|
| All Events   | 71,787  | ####    | 100.0  |
| P1           | 25,011  | 34.8    | 34.8   |
| P2           | 24,393  | 97.5    | 34.0   |
| single cells | 23,079  | 94.6    | 32.1   |
| living cells | 10,000  | 43.3    | 13.9   |
| GFP+         | 871     | 8.7     | 1.2    |

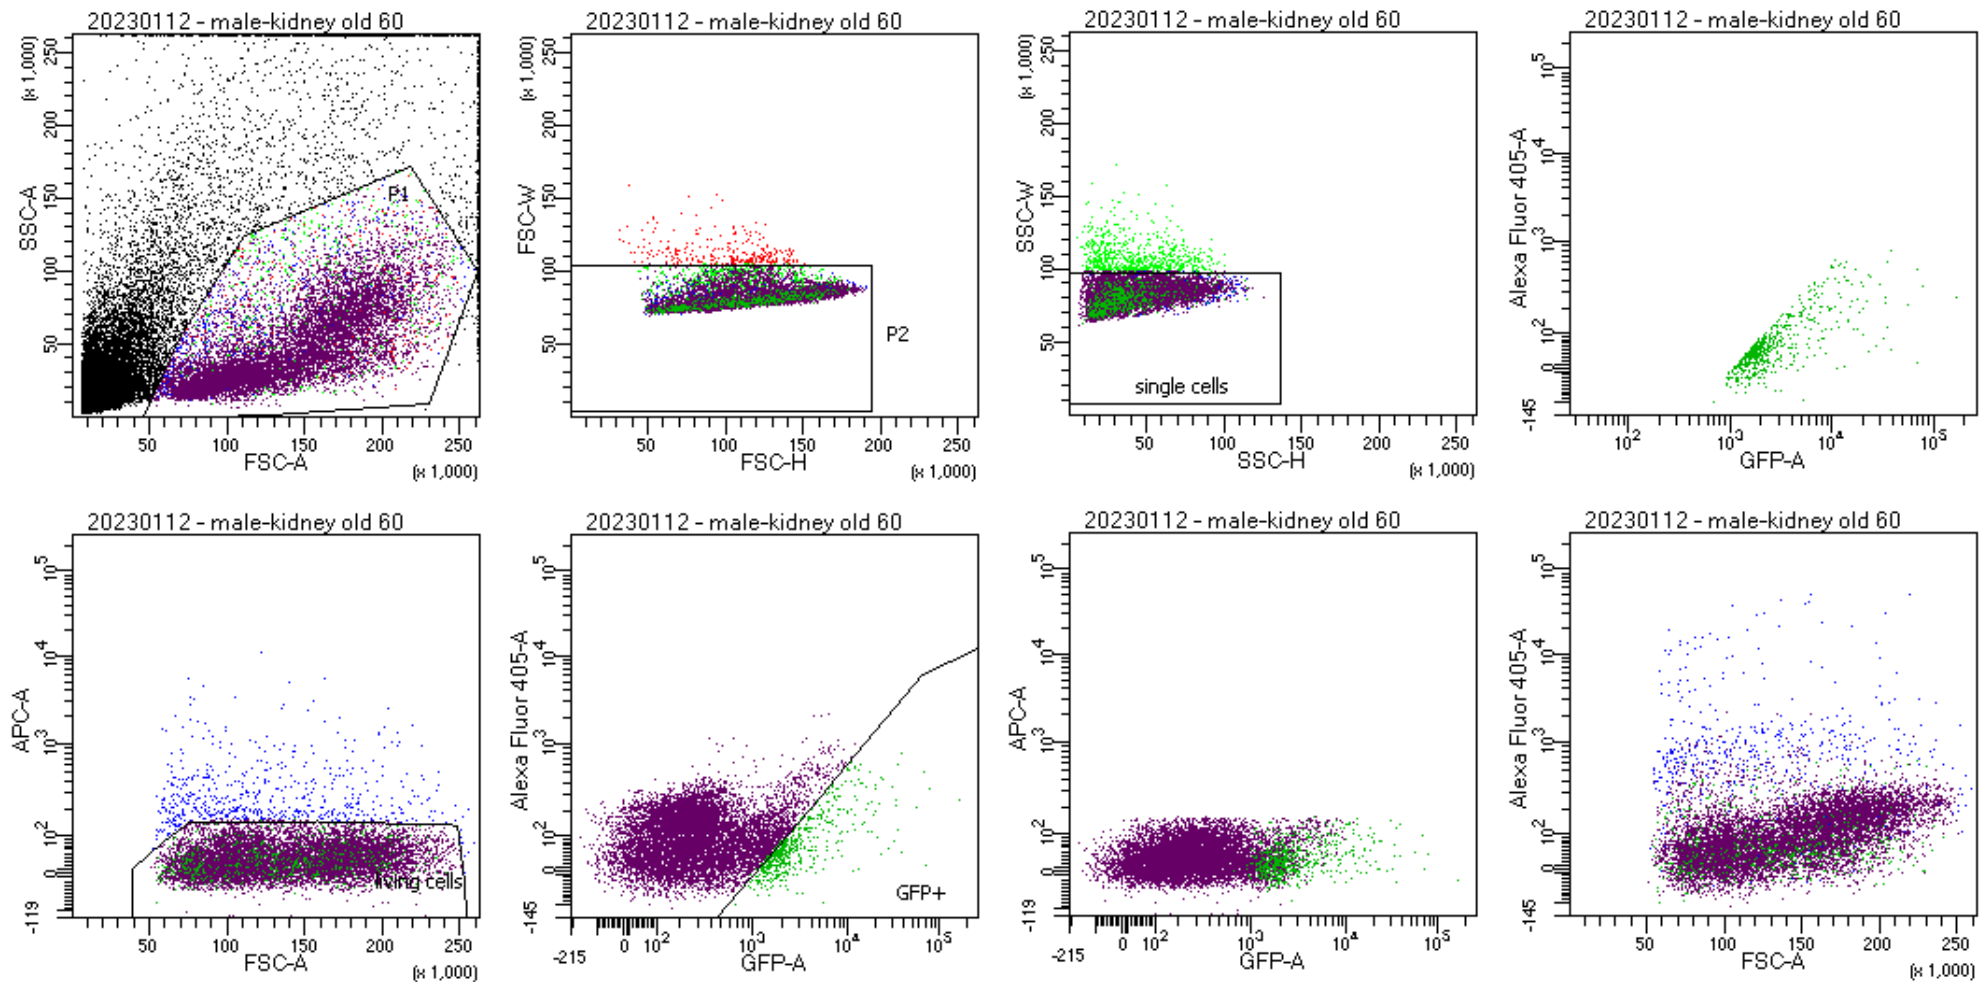

Tube: kidney old 60

| Population   | #Events | %Parent | %Total |
|--------------|---------|---------|--------|
| All Events   | 28,619  | ####    | 100.0  |
| P1           | 11,551  | 40.4    | 40.4   |
| P2           | 11,267  | 97.5    | 39.4   |
| single cells | 10,551  | 93.6    | 36.9   |
| living cells | 10,000  | 94.8    | 34.9   |
| GFP+         | 560     | 5.6     | 2.0    |

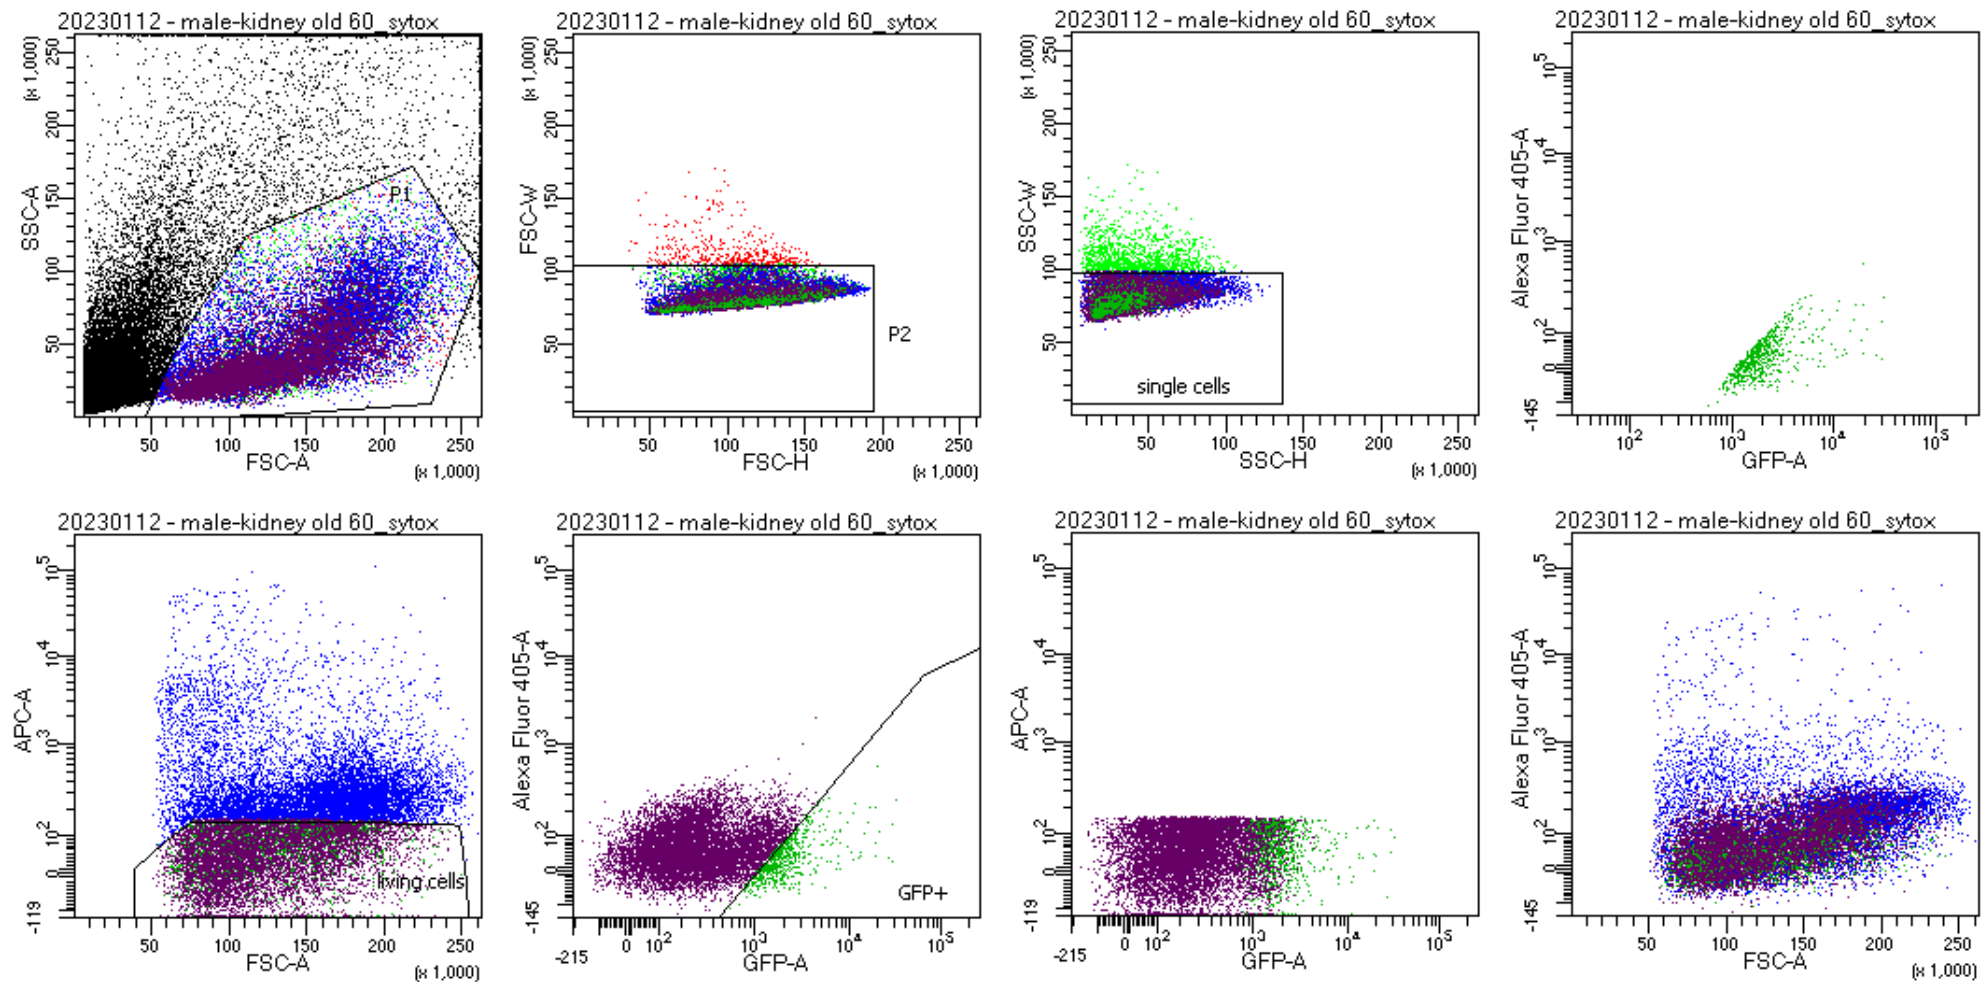

Tube: kidney old 60\_sytox

| Population   | #Events | %Parent | %Total |
|--------------|---------|---------|--------|
| All Events   | 52,205  | ####    | 100.0  |
| P1           | 21,197  | 40.6    | 40.6   |
| P2           | 20,735  | 97.8    | 39.7   |
| single cells | 19,370  | 93.4    | 37.1   |
| living cells | 10,000  | 51.6    | 19.2   |
| GFP+         | 597     | 6.0     | 1.1    |



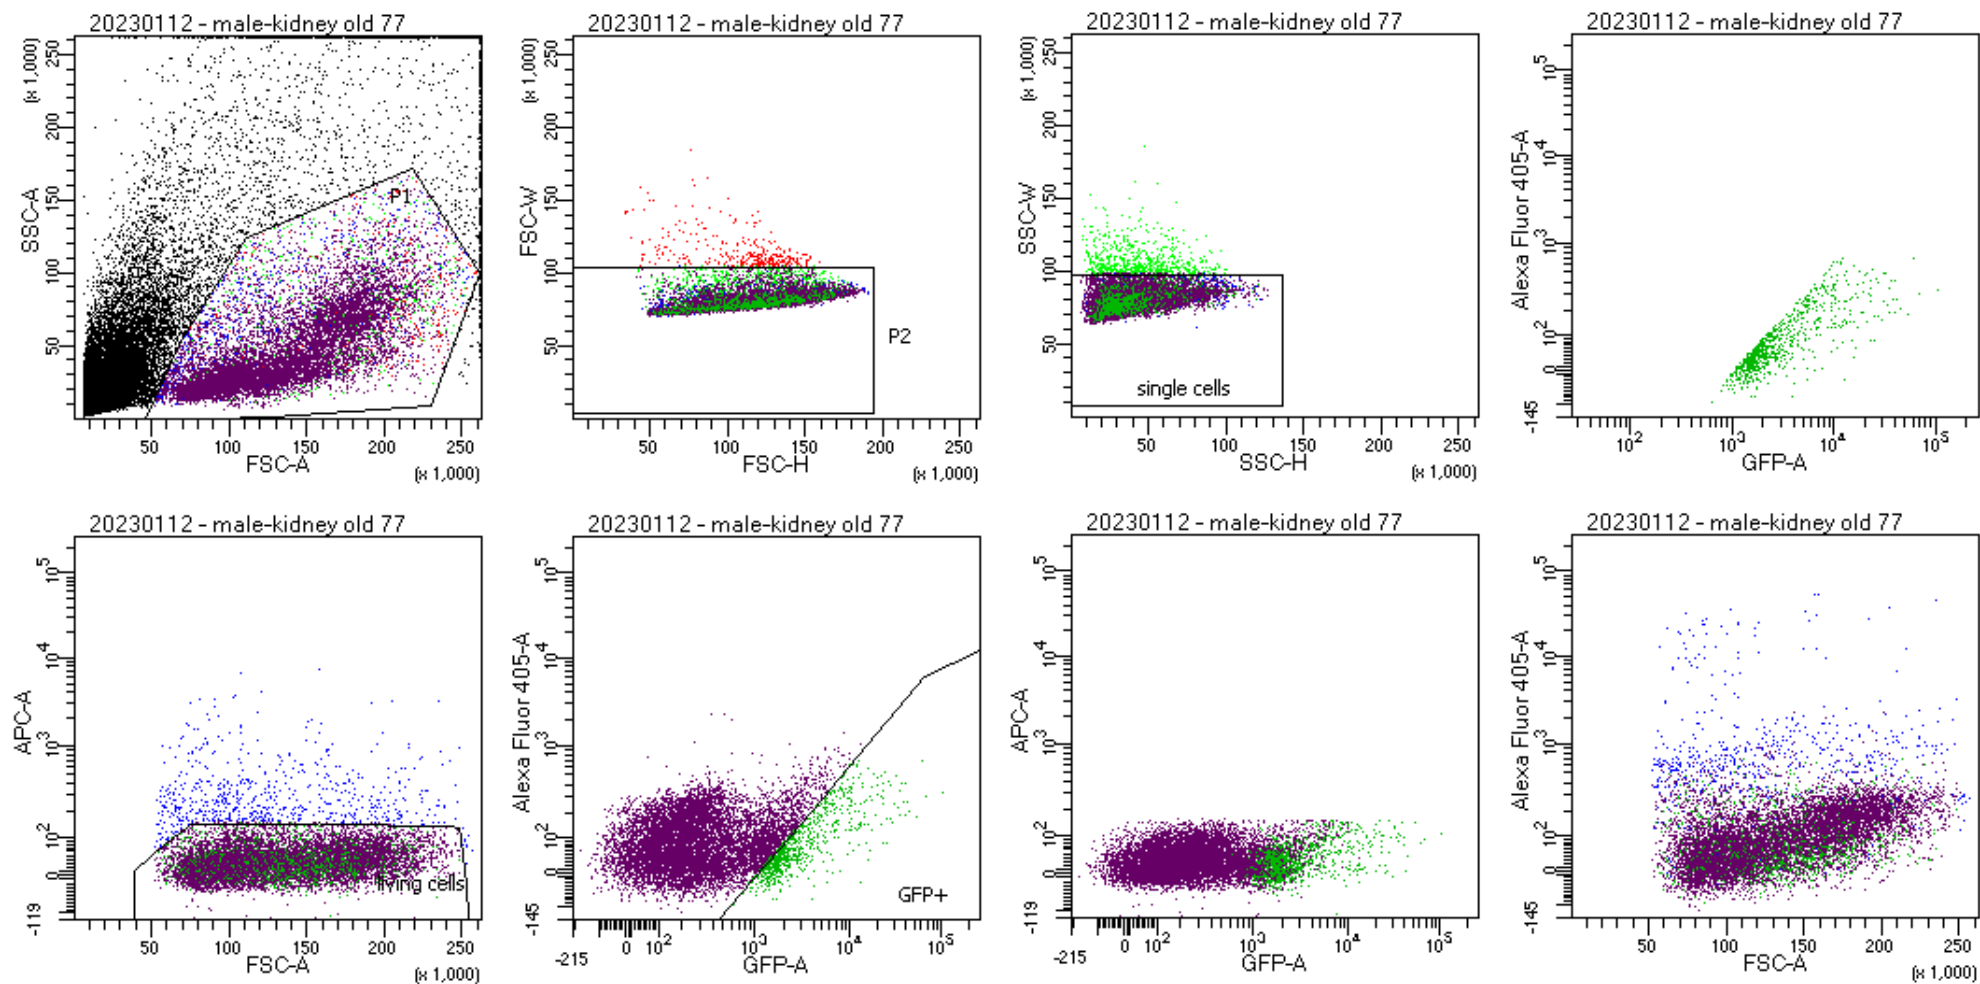

Tube: kidney old 77

| Population   | #Events | %Parent | %Total |
|--------------|---------|---------|--------|
| All Events   | 32,601  | ####    | 100.0  |
| P1           | 11,583  | 35.5    | 35.5   |
| P2           | 11,276  | 97.3    | 34.6   |
| single cells | 10,634  | 94.3    | 32.6   |
| living cells | 10,000  | 94.0    | 30.7   |
| GFP+         | 759     | 7.6     | 2.3    |

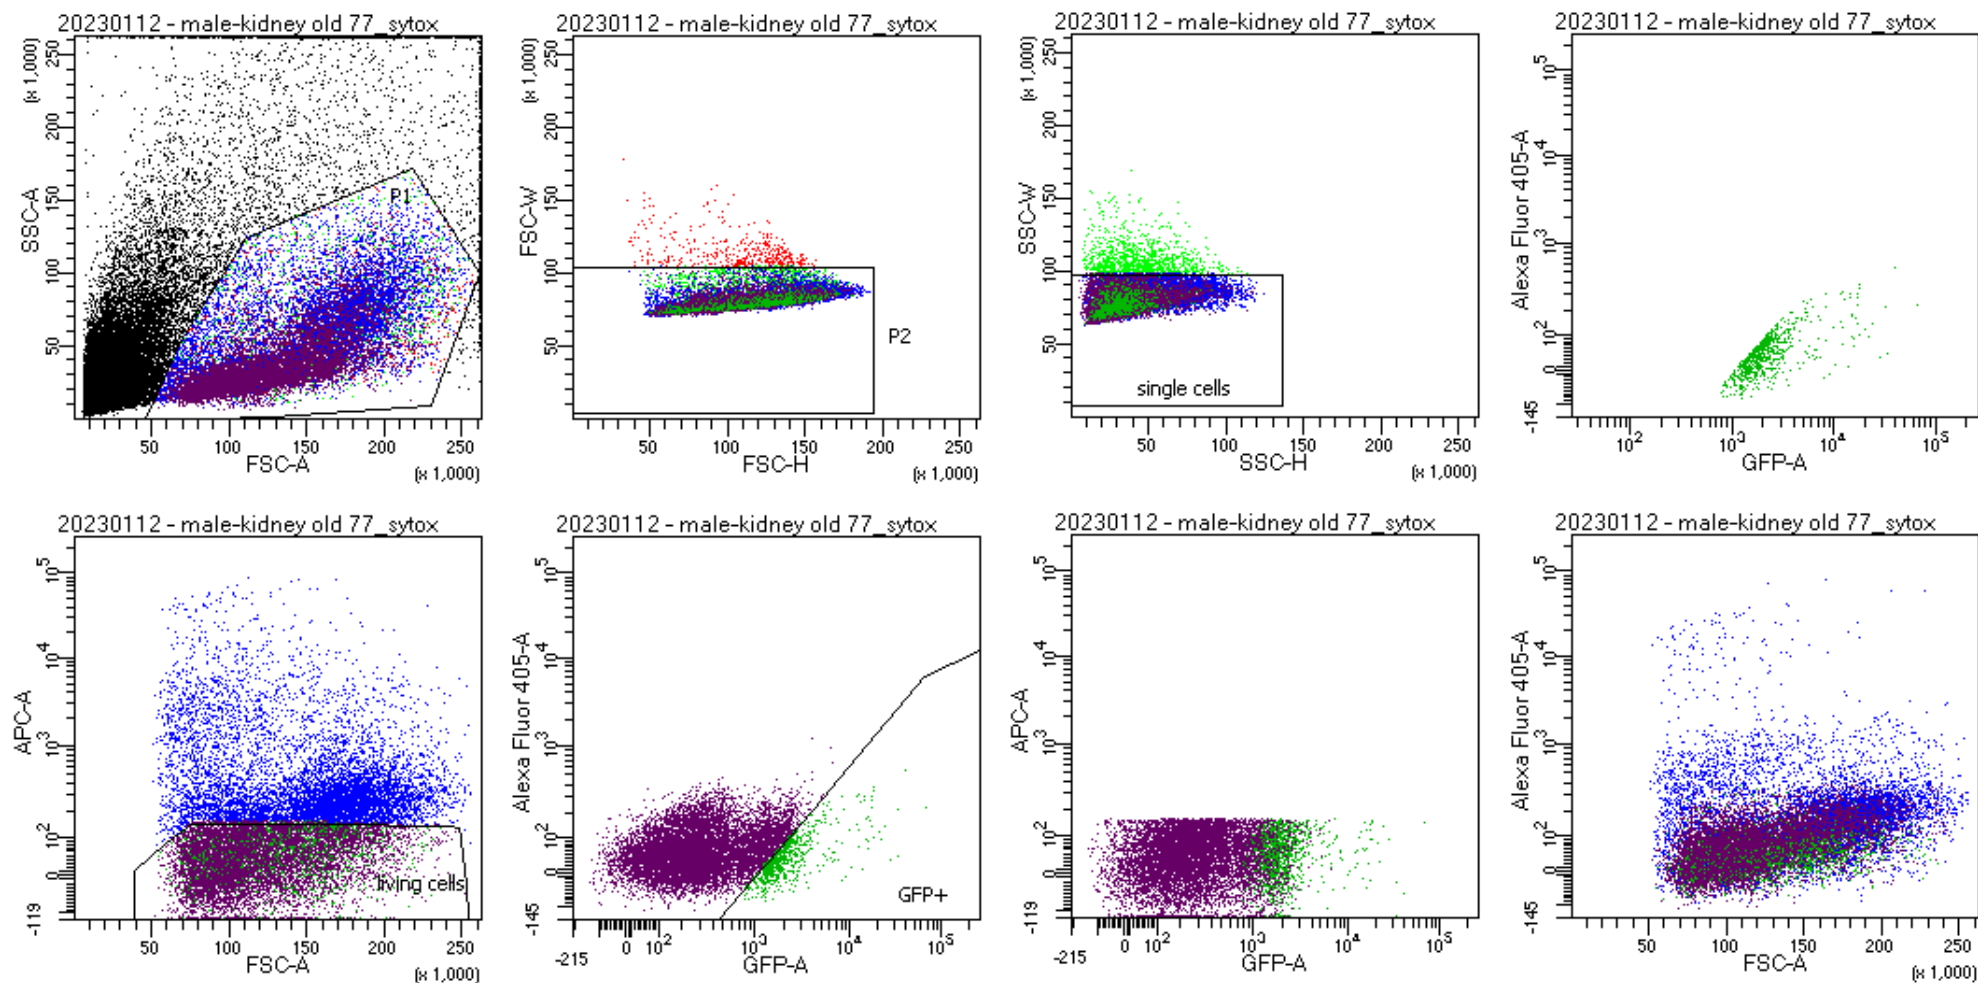

Tube: kidney old 77\_sytox

| Population   | #Events | %Parent | %Total |
|--------------|---------|---------|--------|
| All Events   | 52,348  | ####    | 100.0  |
| P1           | 18,827  | 36.0    | 36.0   |
| P2           | 18,423  | 97.9    | 35.2   |
| single cells | 17,369  | 94.3    | 33.2   |
| living cells | 10,000  | 57.6    | 19.1   |
| GFP+         | 713     | 7.1     | 1.4    |

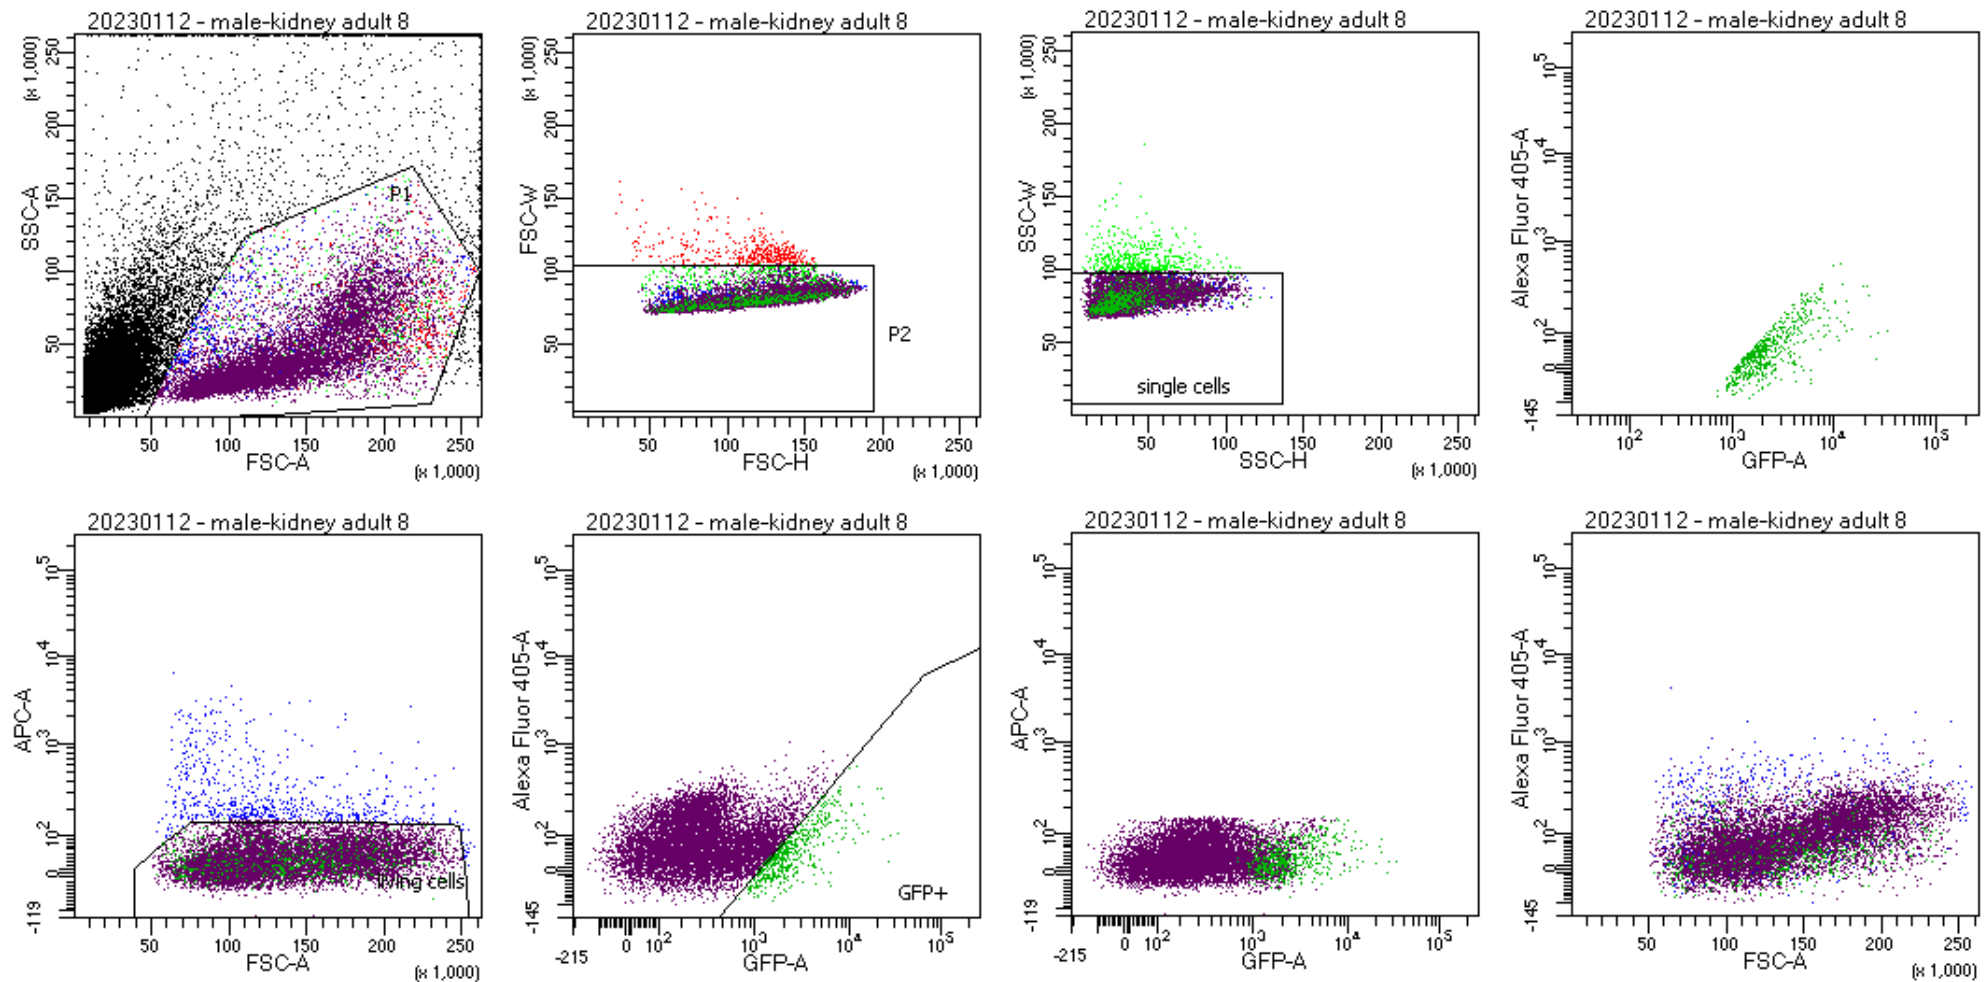

Tube: kidney adult 8

| Population   | #Events | %Parent | %Total |
|--------------|---------|---------|--------|
| All Events   | 37,360  | ####    | 100.0  |
| P1           | 11,587  | 31.0    | 31.0   |
| P2           | 11,155  | 96.3    | 29.9   |
| single cells | 10,662  | 95.6    | 28.5   |
| living cells | 10,000  | 93.8    | 26.8   |
| GFP+         | 567     | 5.7     | 1.5    |

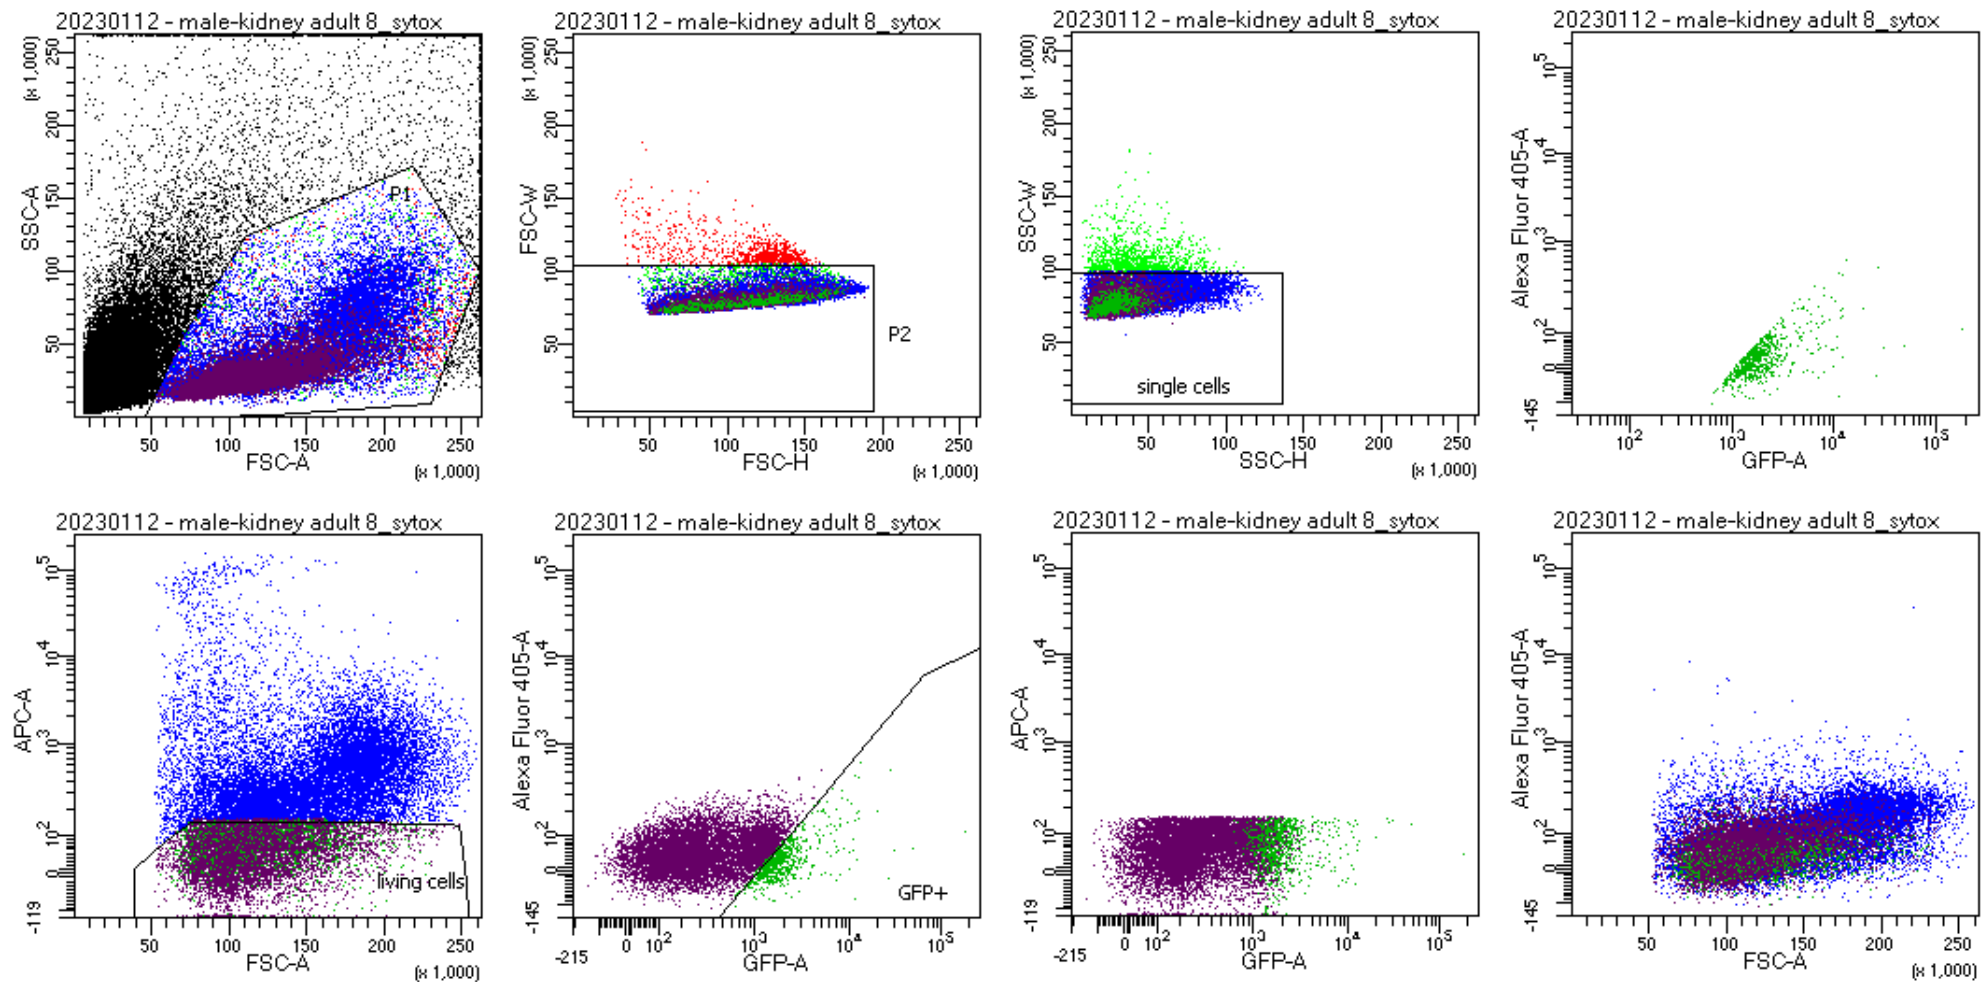

Tube: kidney adult 8\_sytox

| Population   | #Events | %Parent | %Total |
|--------------|---------|---------|--------|
| All Events   | 89,148  | ####    | 100.0  |
| P1           | 26,640  | 29.9    | 29.9   |
| P2           | 25,753  | 96.7    | 28.9   |
| single cells | 24,598  | 95.5    | 27.6   |
| living cells | 10,000  | 40.7    | 11.2   |
| GFP+         | 690     | 6.9     | 0.8    |

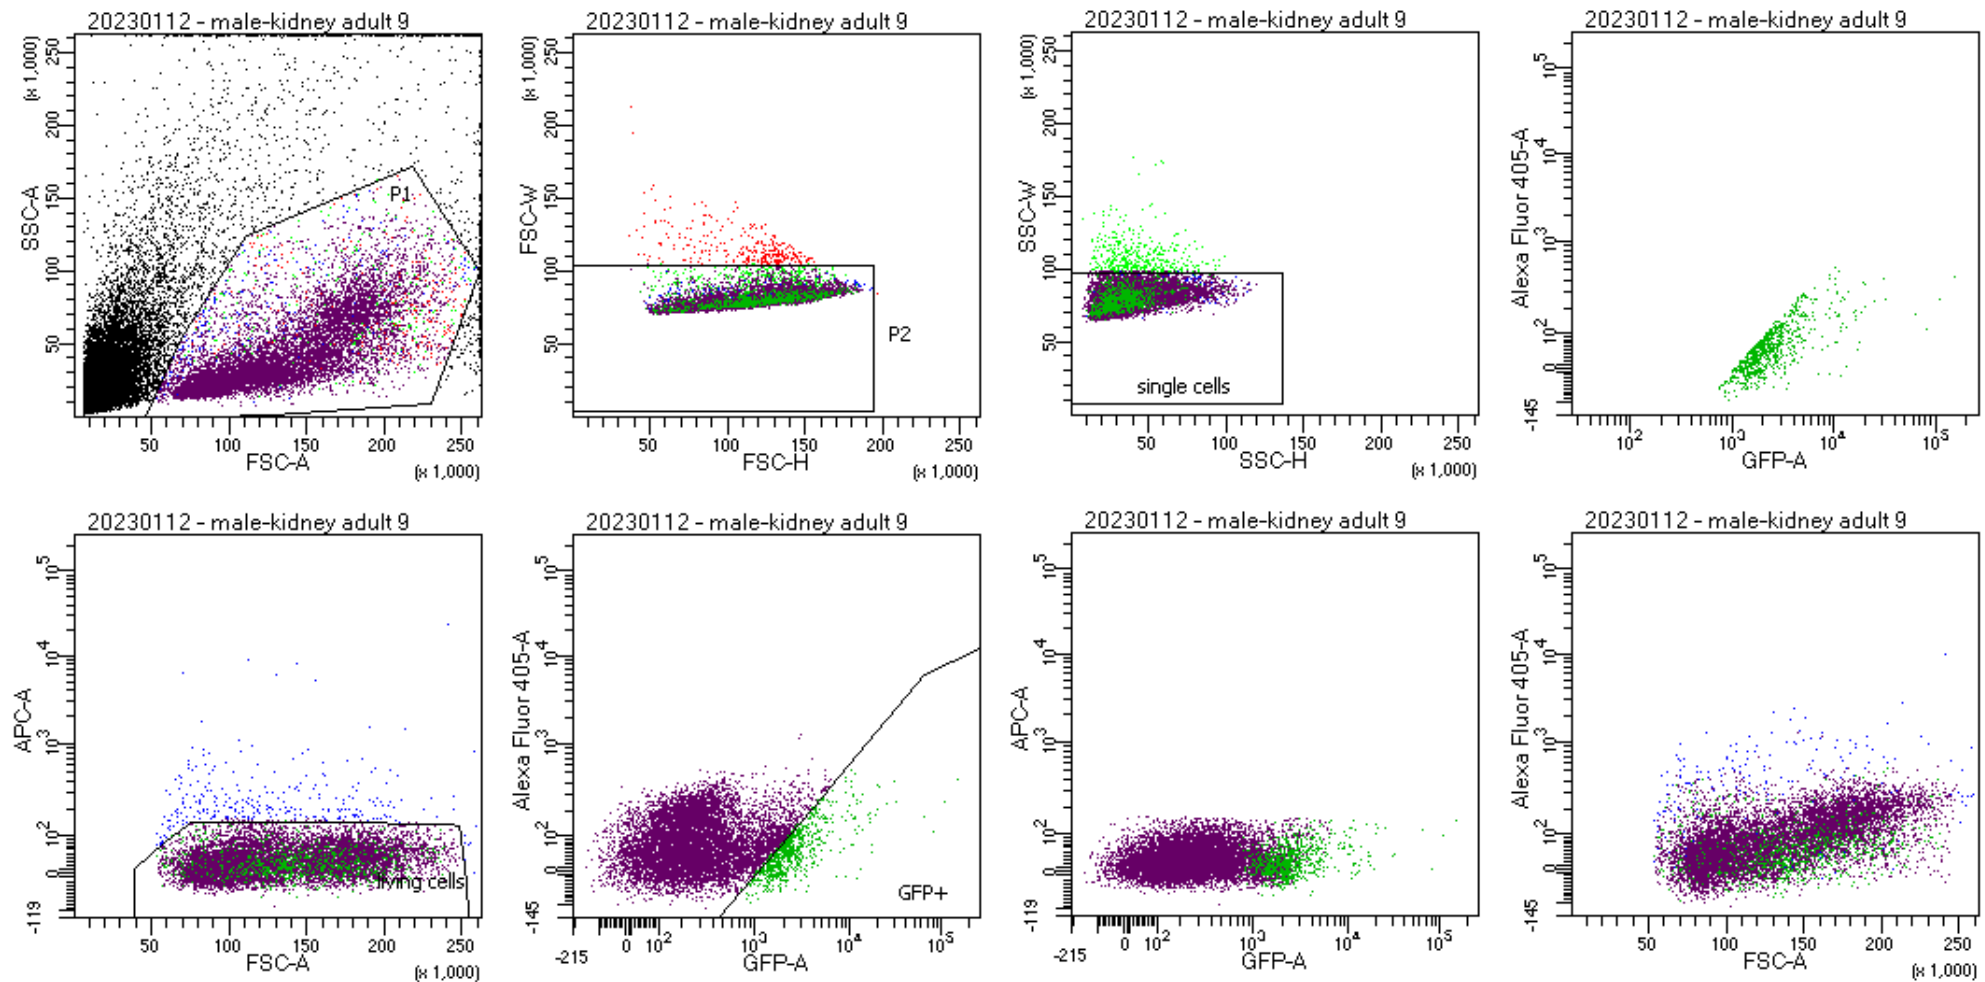

Tube: kidney adult 9

| Population   | #Events | %Parent | %Total |
|--------------|---------|---------|--------|
| All Events   | 27,410  | ####    | 100.0  |
| P1           | 10,975  | 40.0    | 40.0   |
| P2           | 10,684  | 97.3    | 39.0   |
| single cells | 10,282  | 96.2    | 37.5   |
| living cells | 10,000  | 97.3    | 36.5   |
| GFP+         | 795     | 8.0     | 2.9    |



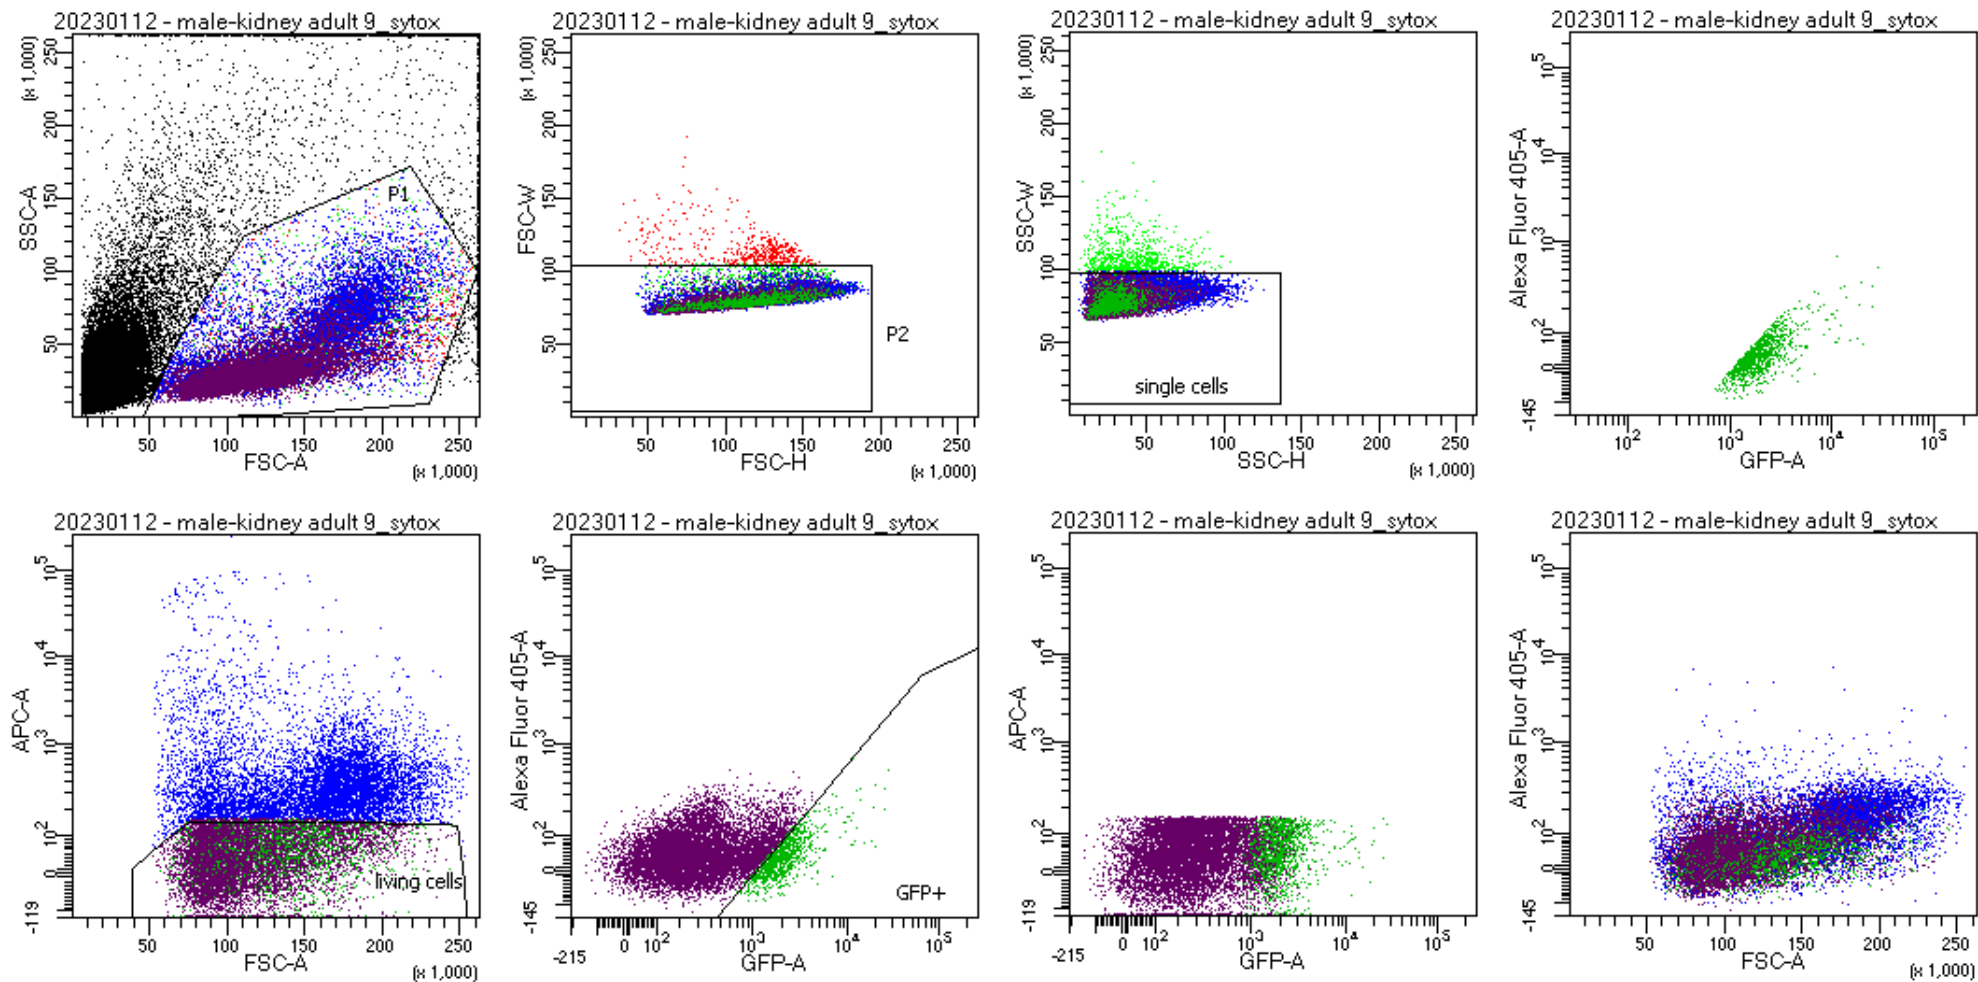

Tube: kidney adult 9\_sytox

| Population   | #Events | %Parent | %Total |
|--------------|---------|---------|--------|
| All Events   | 48,152  | ####    | 100.0  |
| P1           | 19,459  | 40.4    | 40.4   |
| P2           | 18,994  | 97.6    | 39.4   |
| single cells | 18,253  | 96.1    | 37.9   |
| living cells | 10,000  | 54.8    | 20.8   |
| GFP+         | 993     | 9.9     | 2.1    |

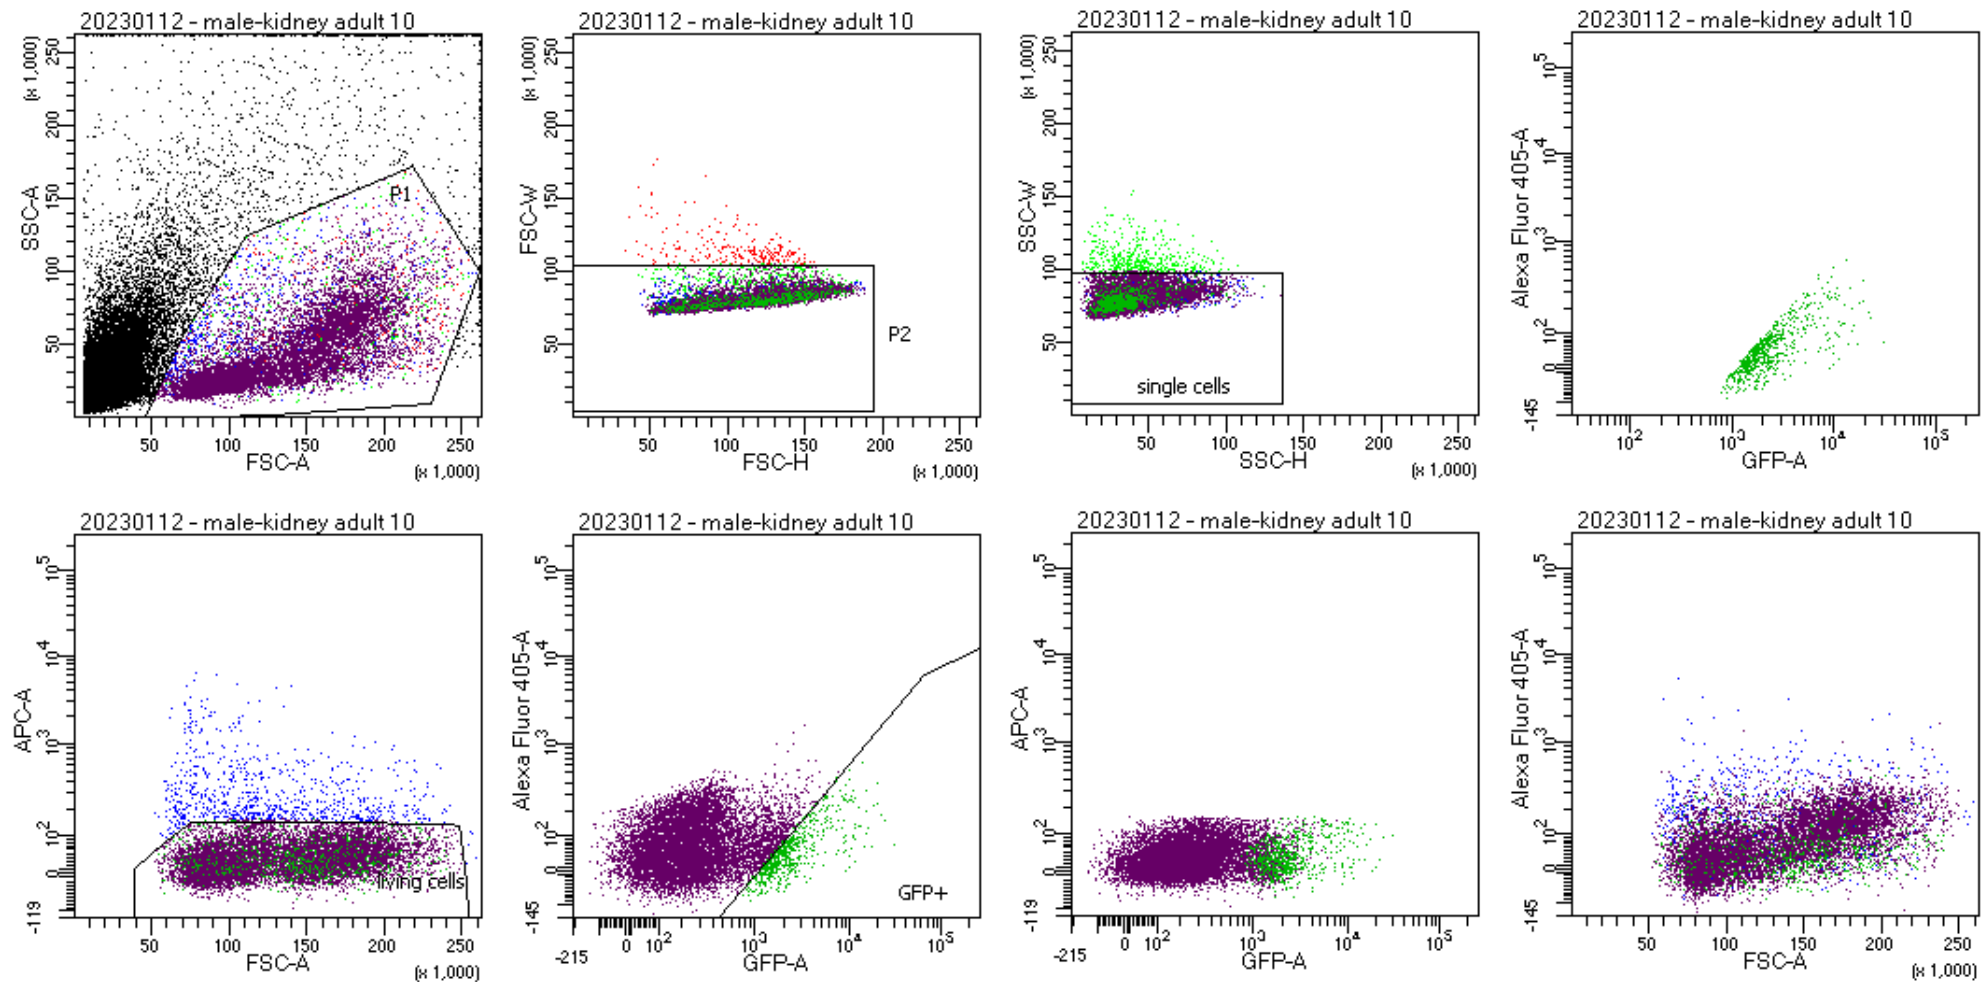

Tube: kidney adult 10

| Population   | #Events | %Parent | %Total |
|--------------|---------|---------|--------|
| All Events   | 39,175  | ####    | 100.0  |
| P1           | 11,437  | 29.2    | 29.2   |
| P2           | 11,206  | 98.0    | 28.6   |
| single cells | 10,771  | 96.1    | 27.5   |
| living cells | 10,000  | 92.8    | 25.5   |
| GFP+         | 644     | 6.4     | 1.6    |

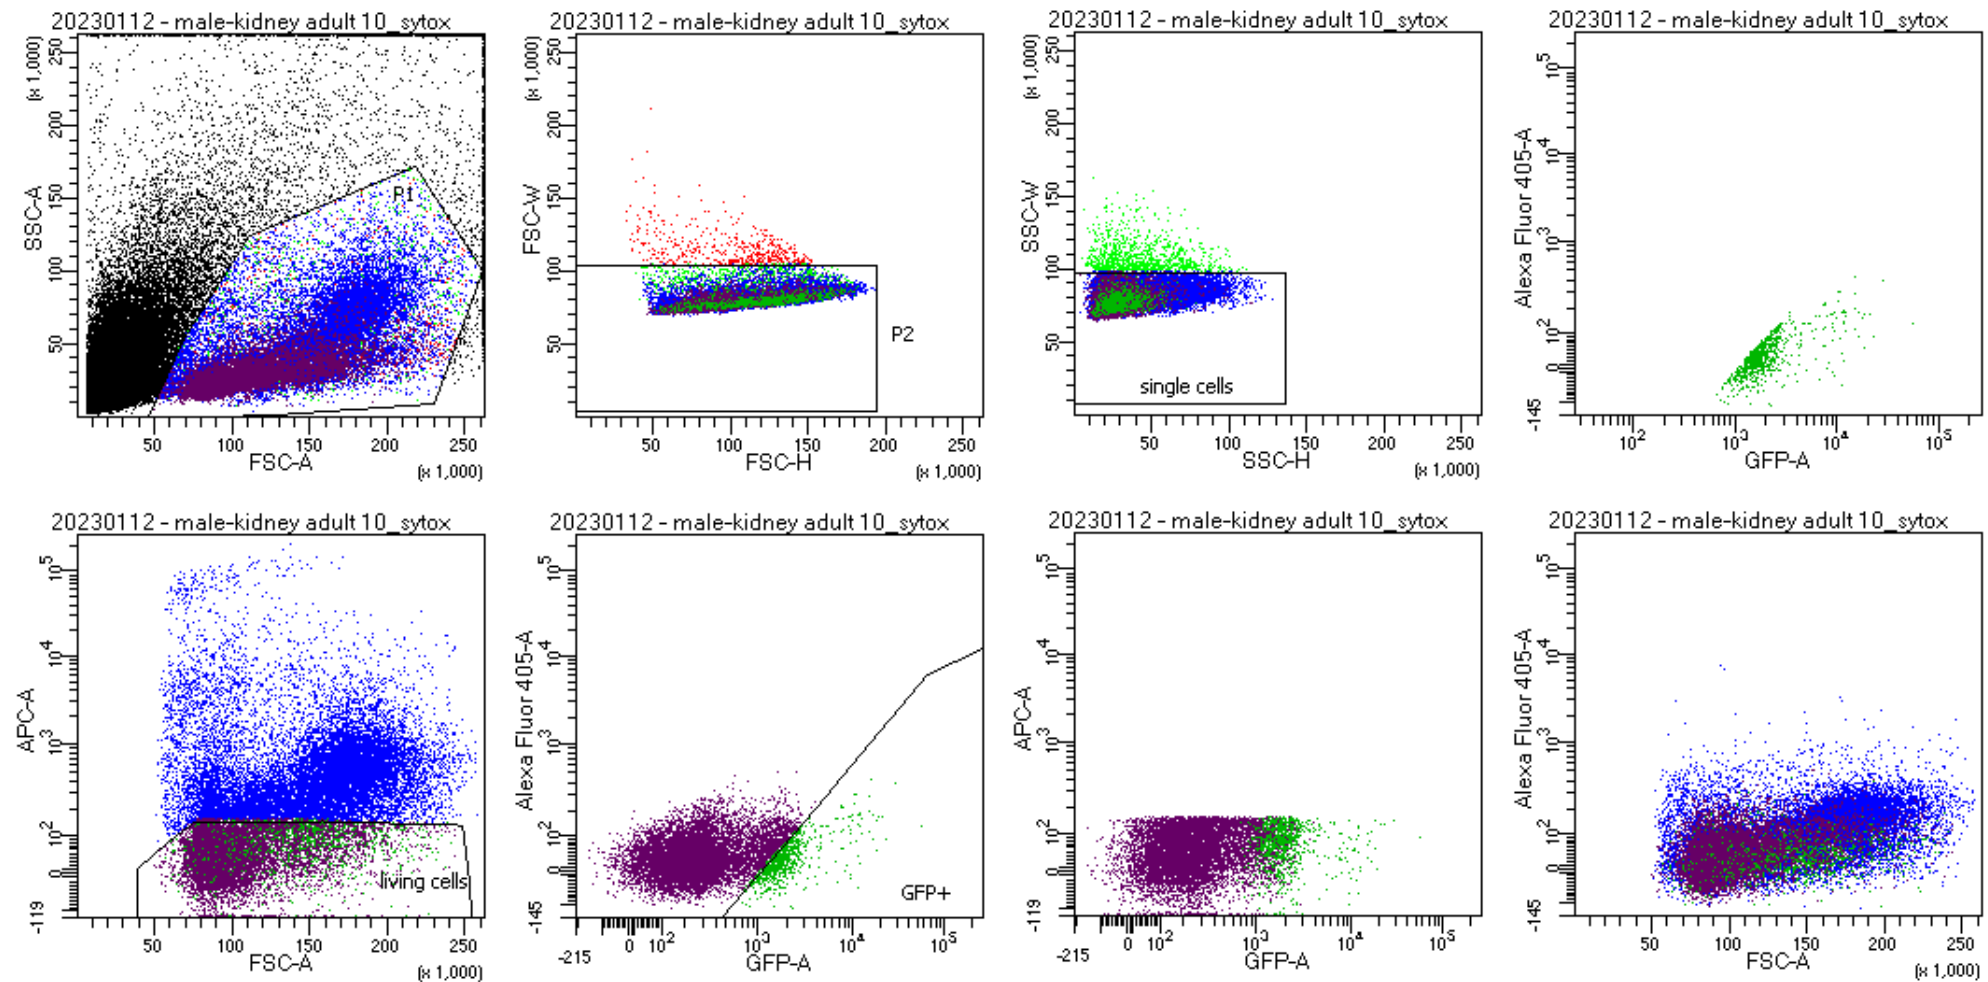

Tube: kidney adult 10\_sytox

| Population   | #Events | %Parent | %Total |
|--------------|---------|---------|--------|
| All Events   | 90,548  | ####    | 100.0  |
| P1           | 26,108  | 28.8    | 28.8   |
| P2           | 25,639  | 98.2    | 28.3   |
| single cells | 24,673  | 96.2    | 27.2   |
| living cells | 10,000  | 40.5    | 11.0   |
| GFP+         | 751     | 7.5     | 0.8    |

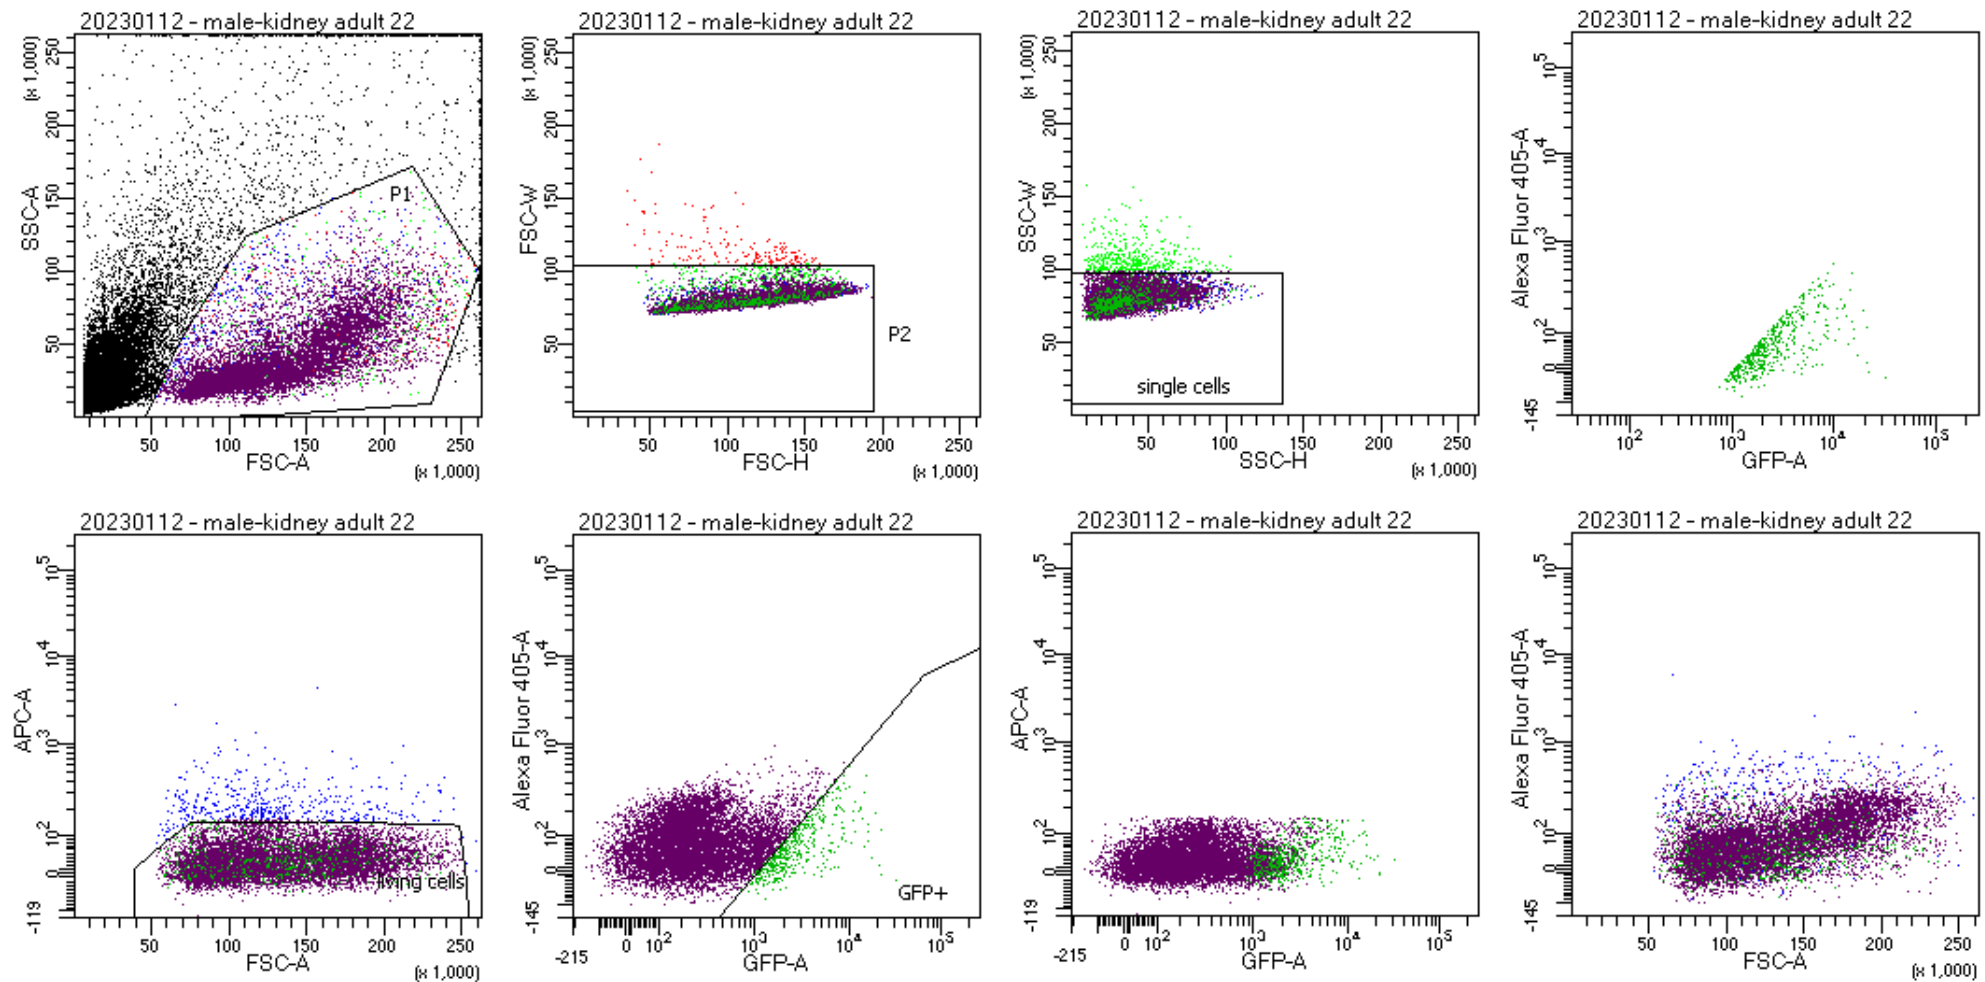

Tube: kidney adult 22

| Population   | #Events | %Parent | %Total |
|--------------|---------|---------|--------|
| All Events   | 28,387  | ####    | 100.0  |
| P1           | 11,046  | 38.9    | 38.9   |
| P2           | 10,880  | 98.5    | 38.3   |
| single cells | 10,432  | 95.9    | 36.7   |
| living cells | 10,000  | 95.9    | 35.2   |
| GFP+         | 487     | 4.9     | 1.7    |

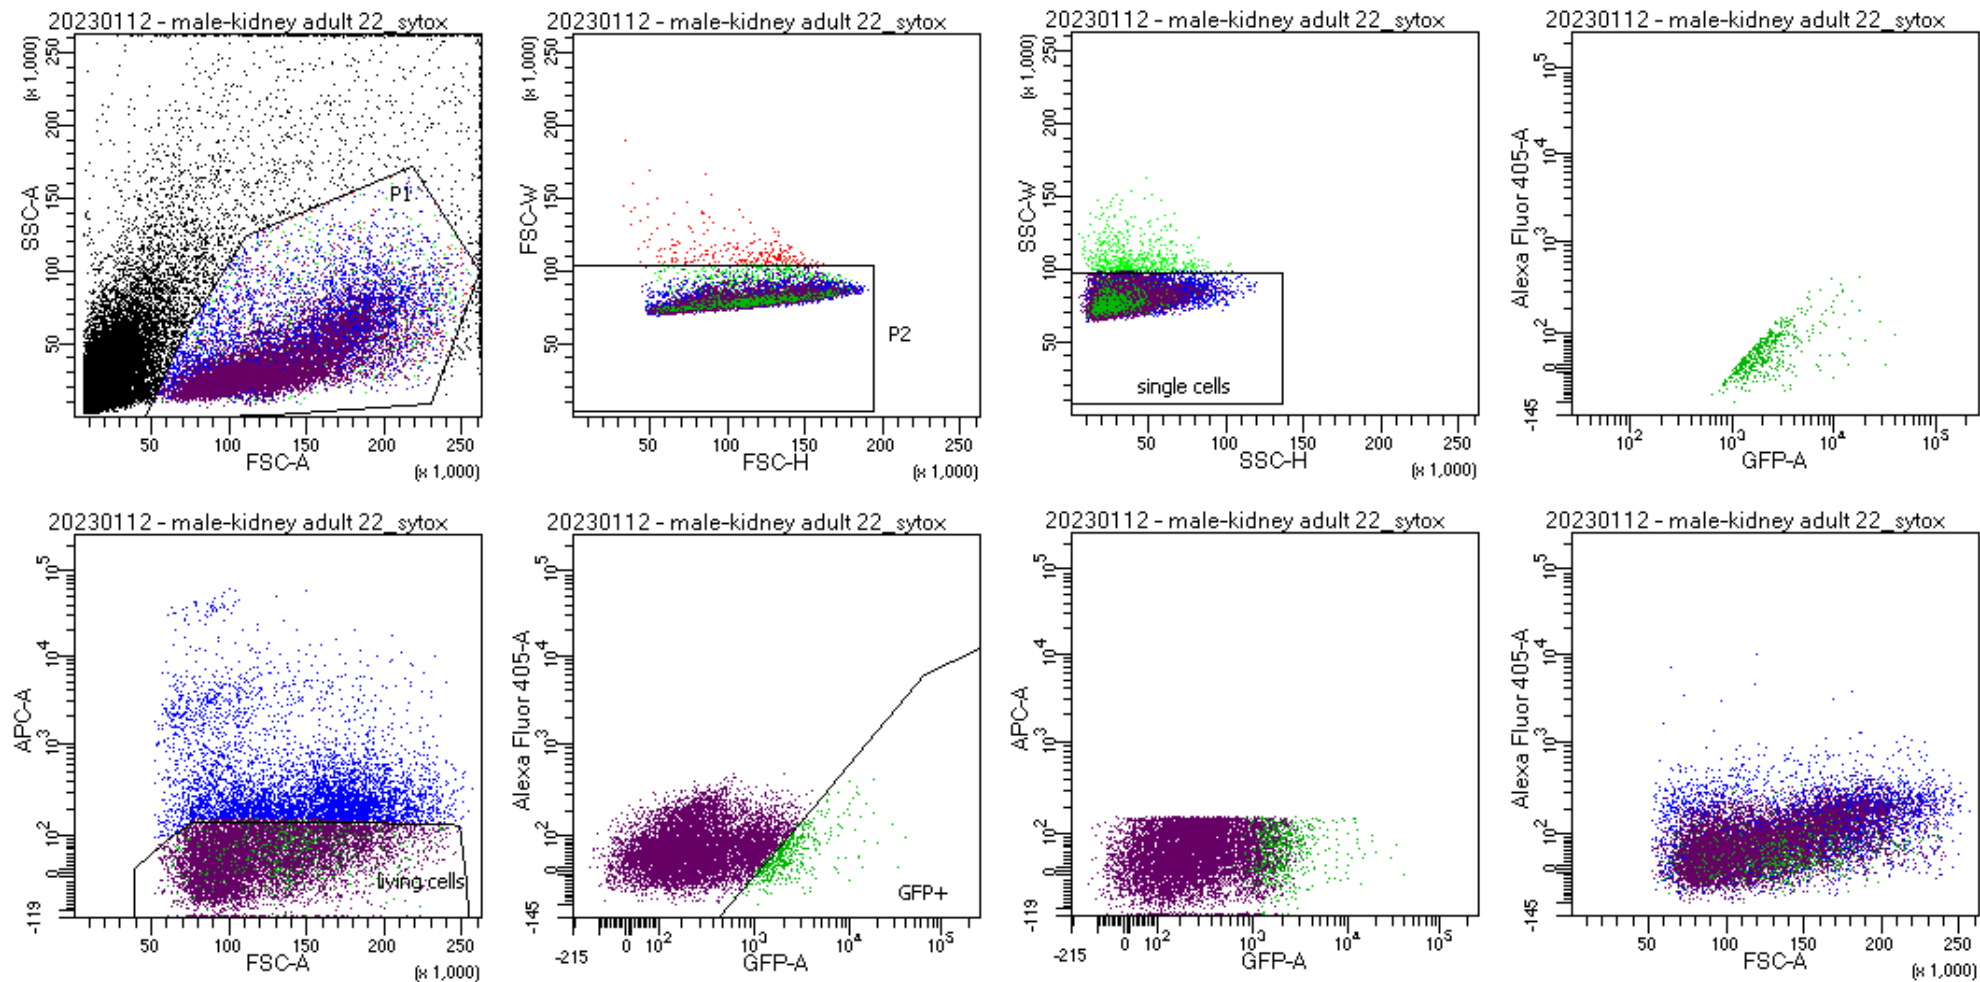

Tube: kidney adult 22\_sytox

| Population   | #Events | %Parent | %Total |
|--------------|---------|---------|--------|
| All Events   | 41,222  | ####    | 100.0  |
| P1           | 16,019  | 38.9    | 38.9   |
| P2           | 15,768  | 98.4    | 38.3   |
| single cells | 15,219  | 96.5    | 36.9   |
| living cells | 10,000  | 65.7    | 24.3   |
| GFP+         | 506     | 5.1     | 1.2    |



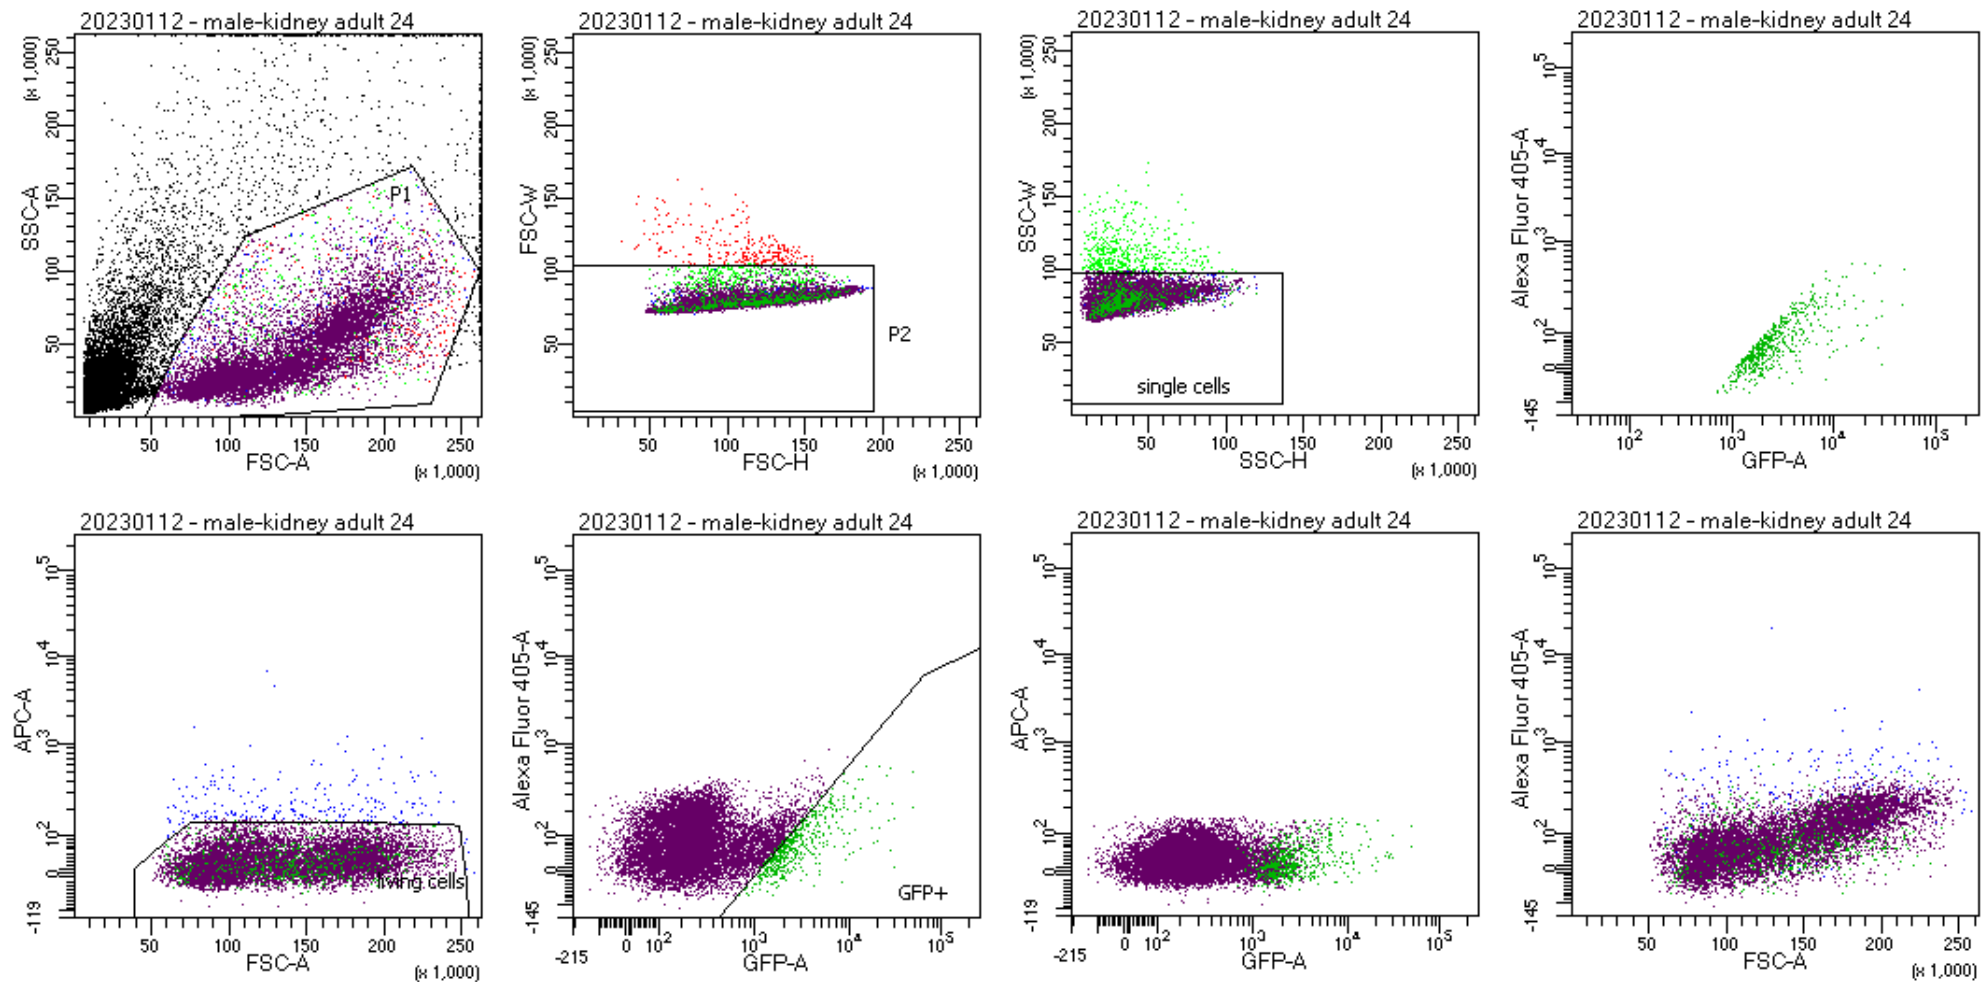

Tube: kidney adult 24

| Population   | #Events | %Parent | %Total |
|--------------|---------|---------|--------|
| All Events   | 21,757  | ####    | 100.0  |
| P1           | 11,007  | 50.6    | 50.6   |
| P2           | 10,740  | 97.6    | 49.4   |
| single cells | 10,226  | 95.2    | 47.0   |
| living cells | 10,000  | 97.8    | 46.0   |
| GFP+         | 544     | 5.4     | 2.5    |

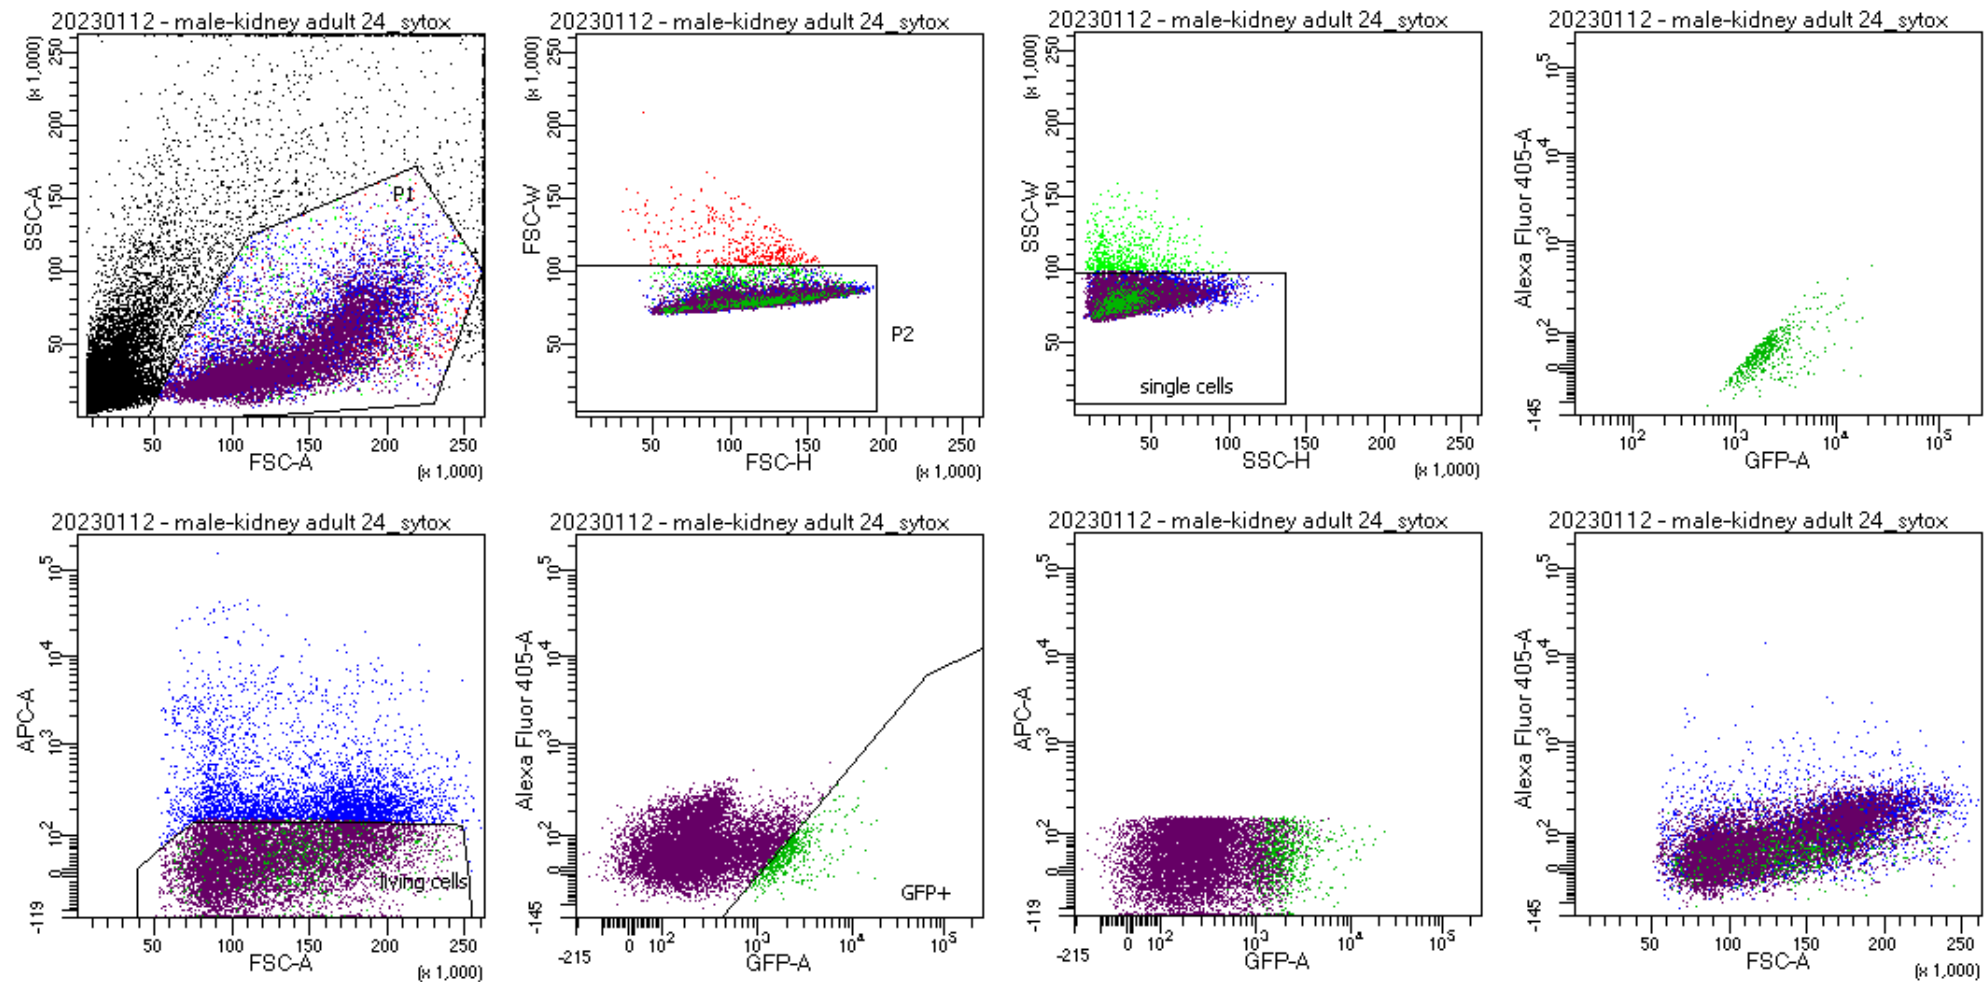

Tube: kidney adult 24\_sytox

| Population   | #Events | %Parent | %Total |
|--------------|---------|---------|--------|
| All Events   | 30,495  | ####    | 100.0  |
| P1           | 15,188  | 49.8    | 49.8   |
| P2           | 14,804  | 97.5    | 48.5   |
| single cells | 14,173  | 95.7    | 46.5   |
| living cells | 10,000  | 70.6    | 32.8   |
| GFP+         | 522     | 5.2     | 1.7    |

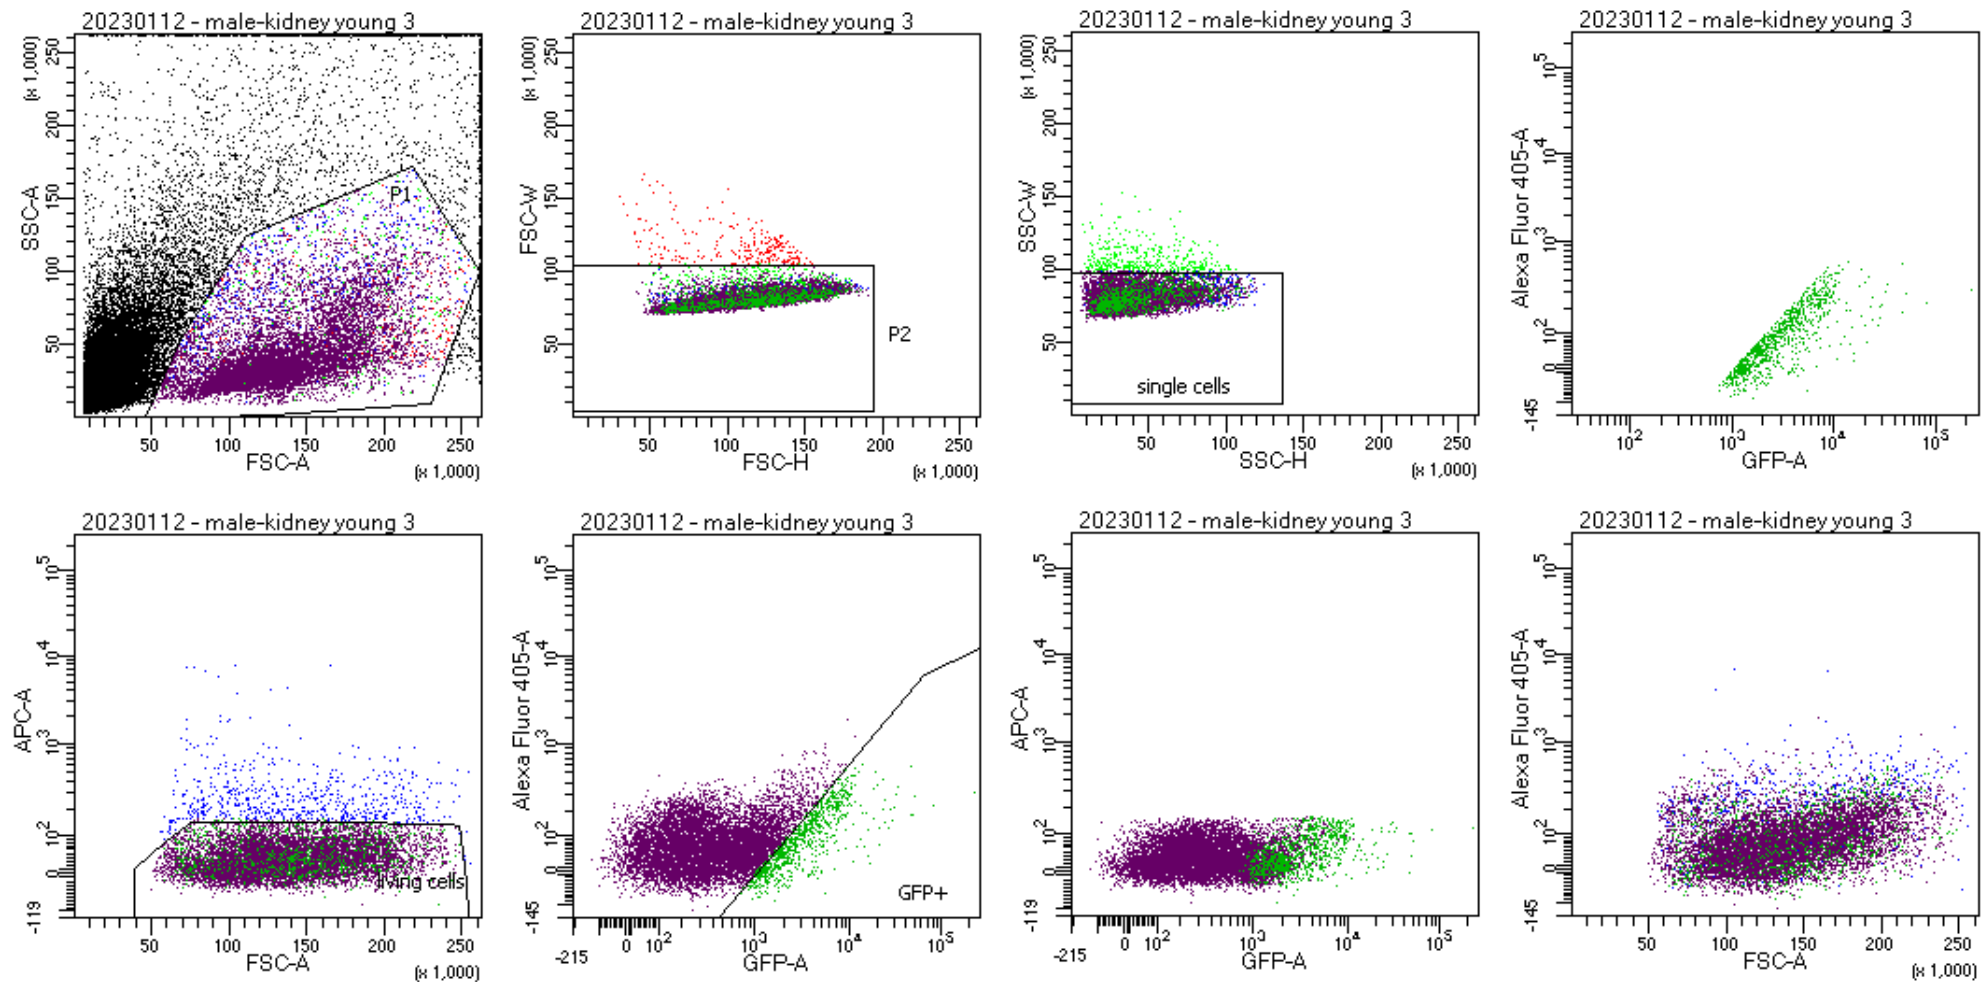

Tube: kidney young 3

| Population   | #Events | %Parent | %Total |
|--------------|---------|---------|--------|
| All Events   | 40,830  | ####    | 100.0  |
| P1           | 11,250  | 27.6    | 27.6   |
| P2           | 11,011  | 97.9    | 27.0   |
| single cells | 10,608  | 96.3    | 26.0   |
| living cells | 10,000  | 94.3    | 24.5   |
| GFP+         | 834     | 8.3     | 2.0    |

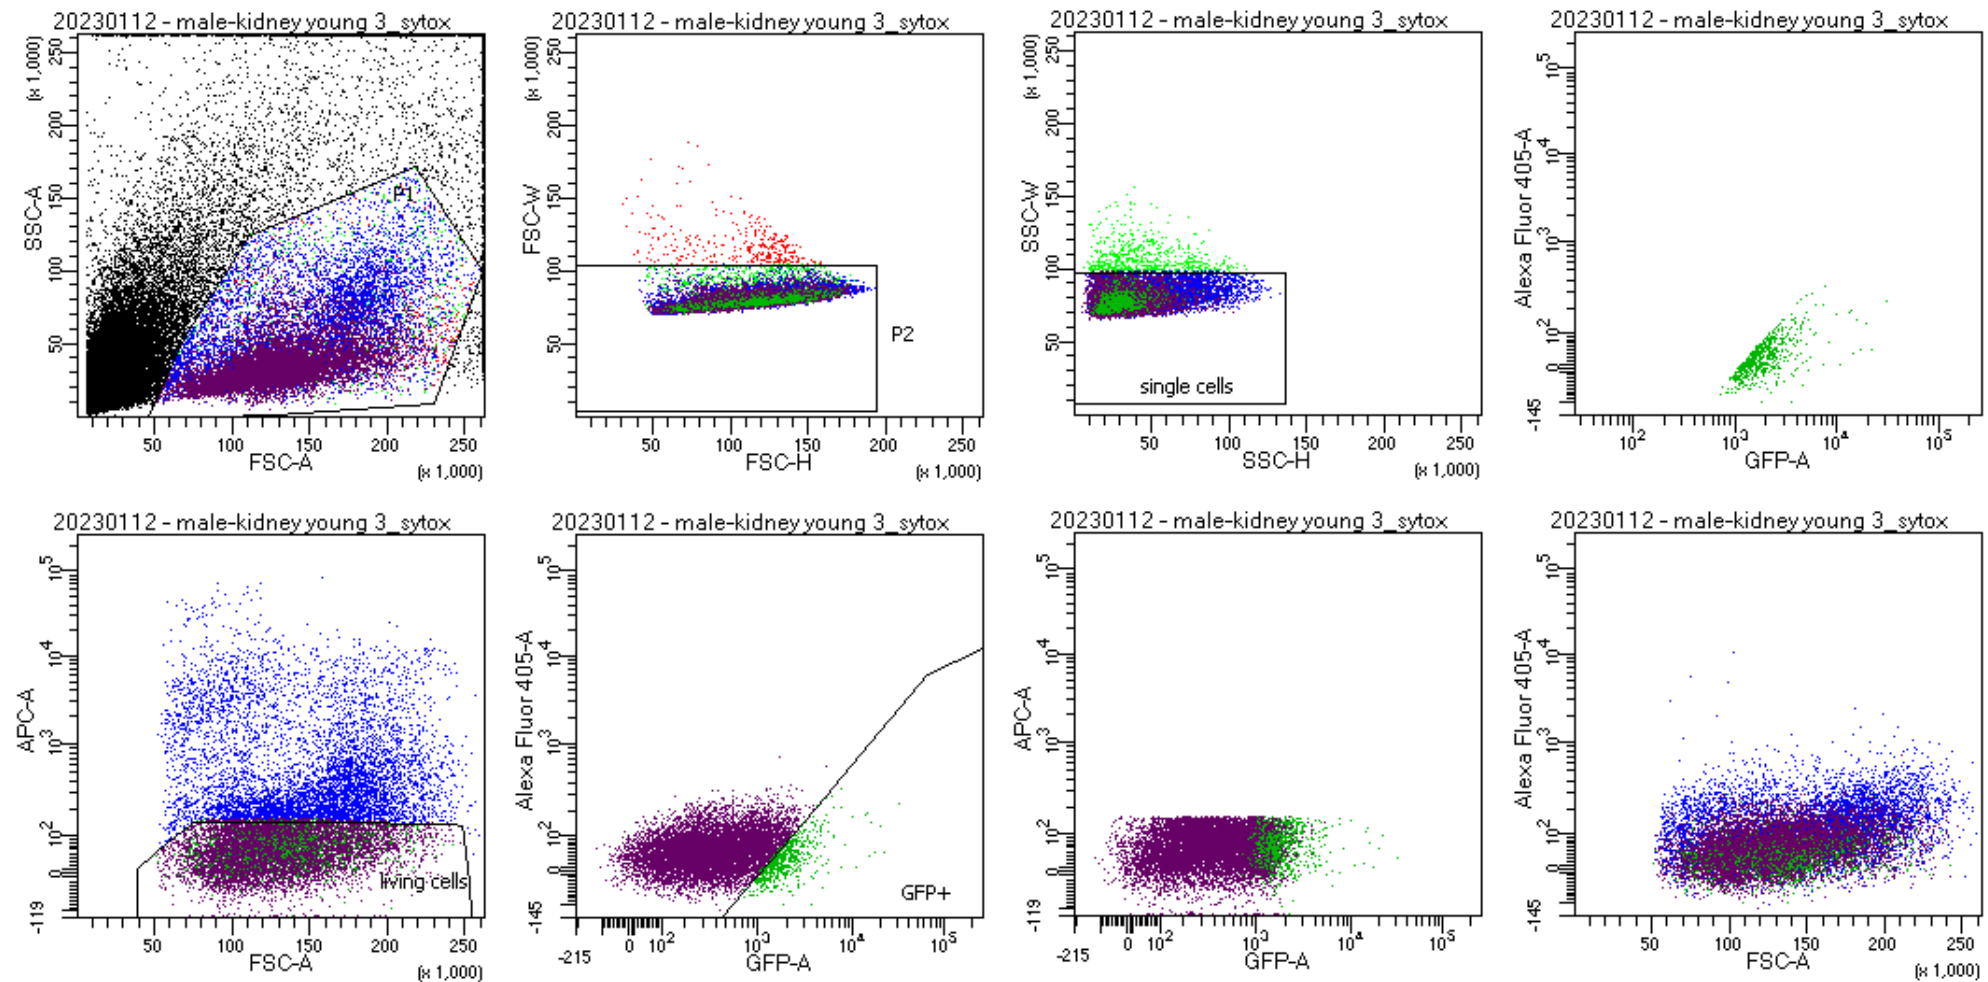

Tube: kidney young 3\_sytox

| Population   | #Events | %Parent | %Total |
|--------------|---------|---------|--------|
| All Events   | 61,096  | ####    | 100.0  |
| P1           | 16,762  | 27.4    | 27.4   |
| P2           | 16,438  | 98.1    | 26.9   |
| single cells | 15,817  | 96.2    | 25.9   |
| living cells | 10,000  | 63.2    | 16.4   |
| GFP+         | 635     | 6.4     | 1.0    |

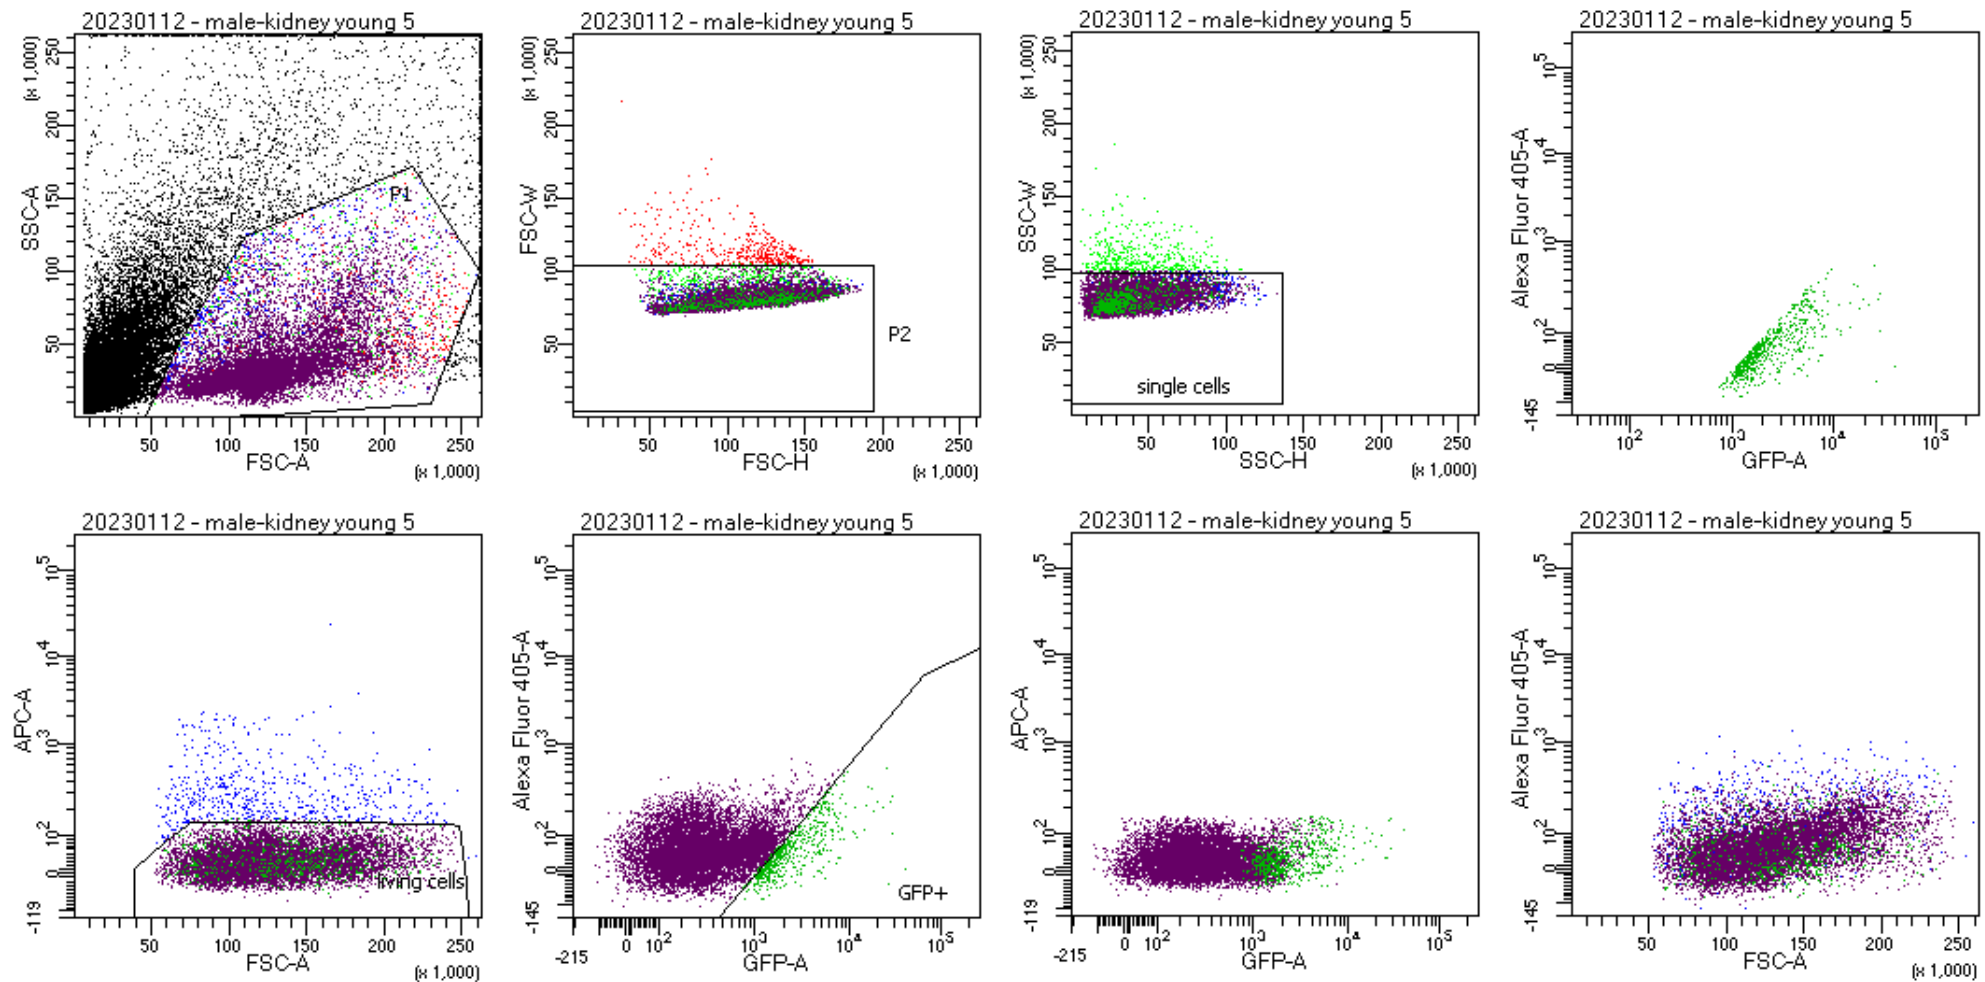

Tube: kidney young 5

| Population   | #Events | %Parent | %Total |
|--------------|---------|---------|--------|
| All Events   | 42,323  | ####    | 100.0  |
| P1           | 11,424  | 27.0    | 27.0   |
| P2           | 11,028  | 96.5    | 26.1   |
| single cells | 10,586  | 96.0    | 25.0   |
| living cells | 10,000  | 94.5    | 23.6   |
| GFP+         | 571     | 5.7     | 1.3    |



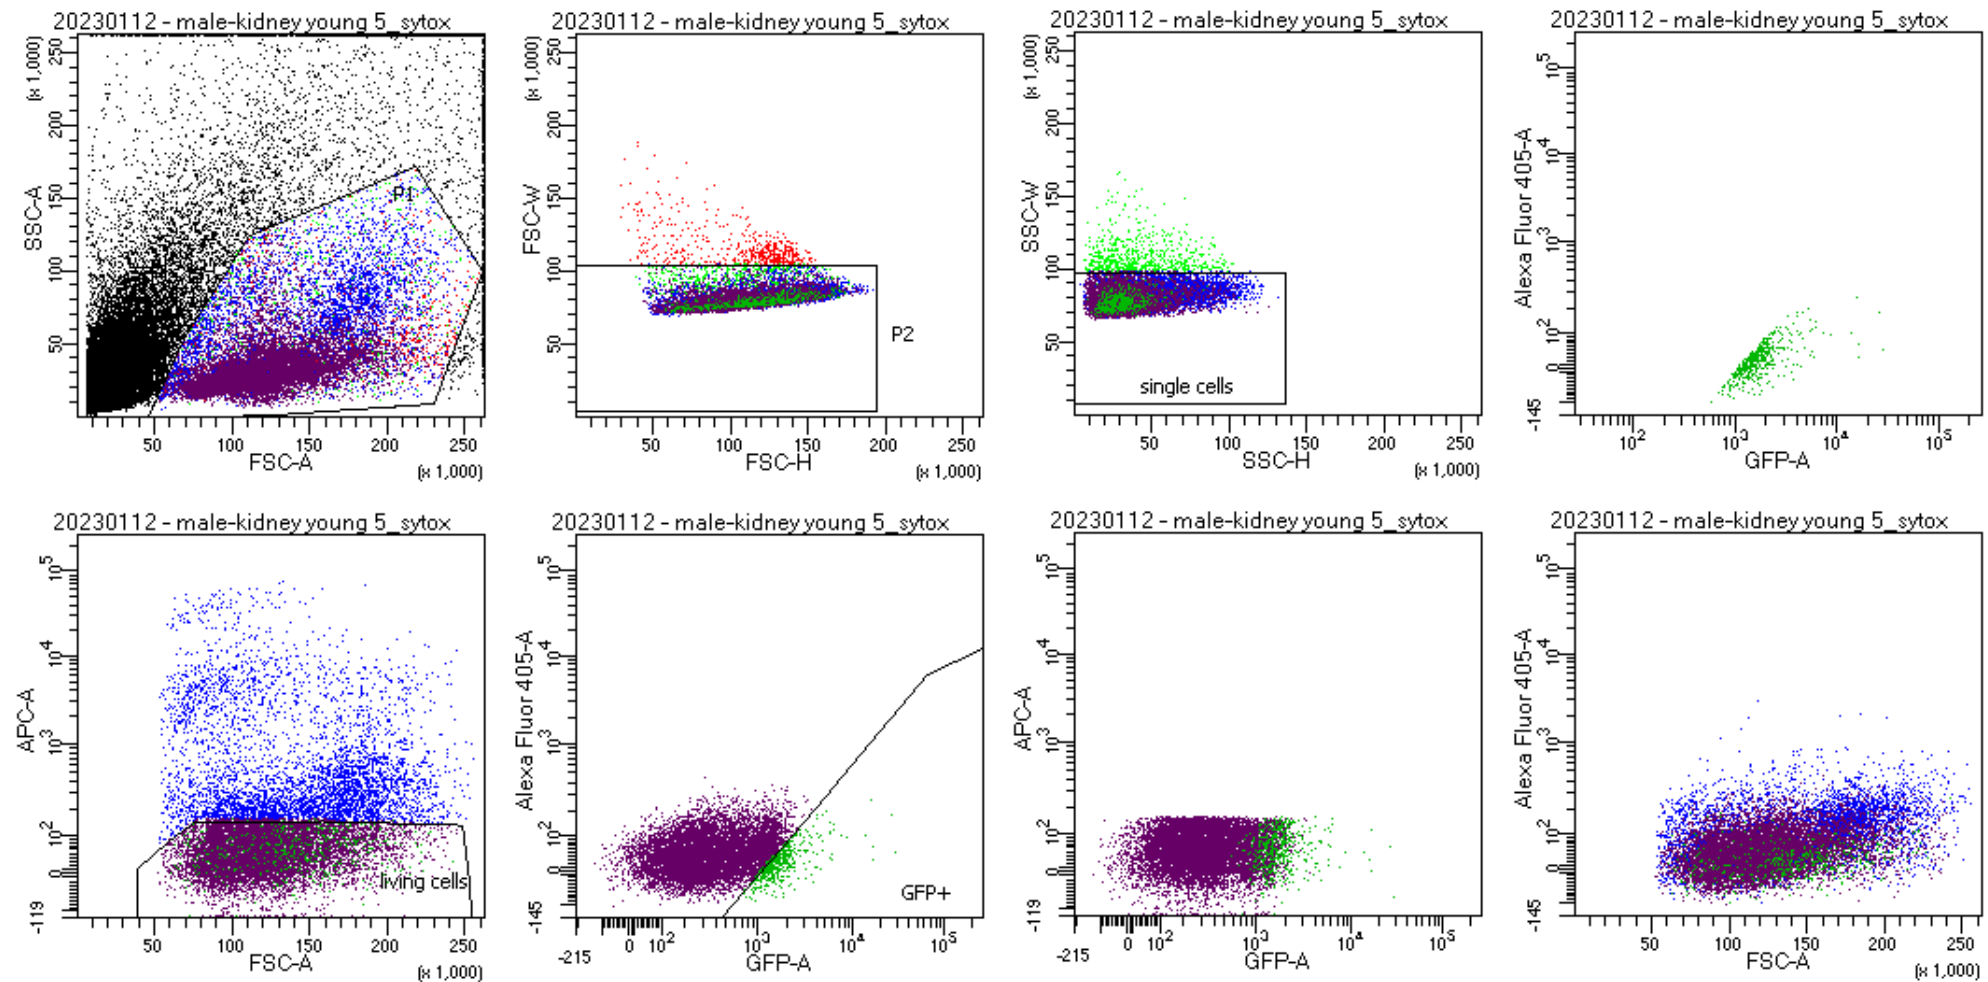

Tube: kidney young 5\_sytox

| Population   | #Events | %Parent | %Total |
|--------------|---------|---------|--------|
| All Events   | 58,062  | ####    | 100.0  |
| P1           | 15,480  | 26.7    | 26.7   |
| P2           | 15,002  | 96.9    | 25.8   |
| single cells | 14,340  | 95.6    | 24.7   |
| living cells | 10,000  | 69.7    | 17.2   |
| GFP+         | 479     | 4.8     | 0.8    |

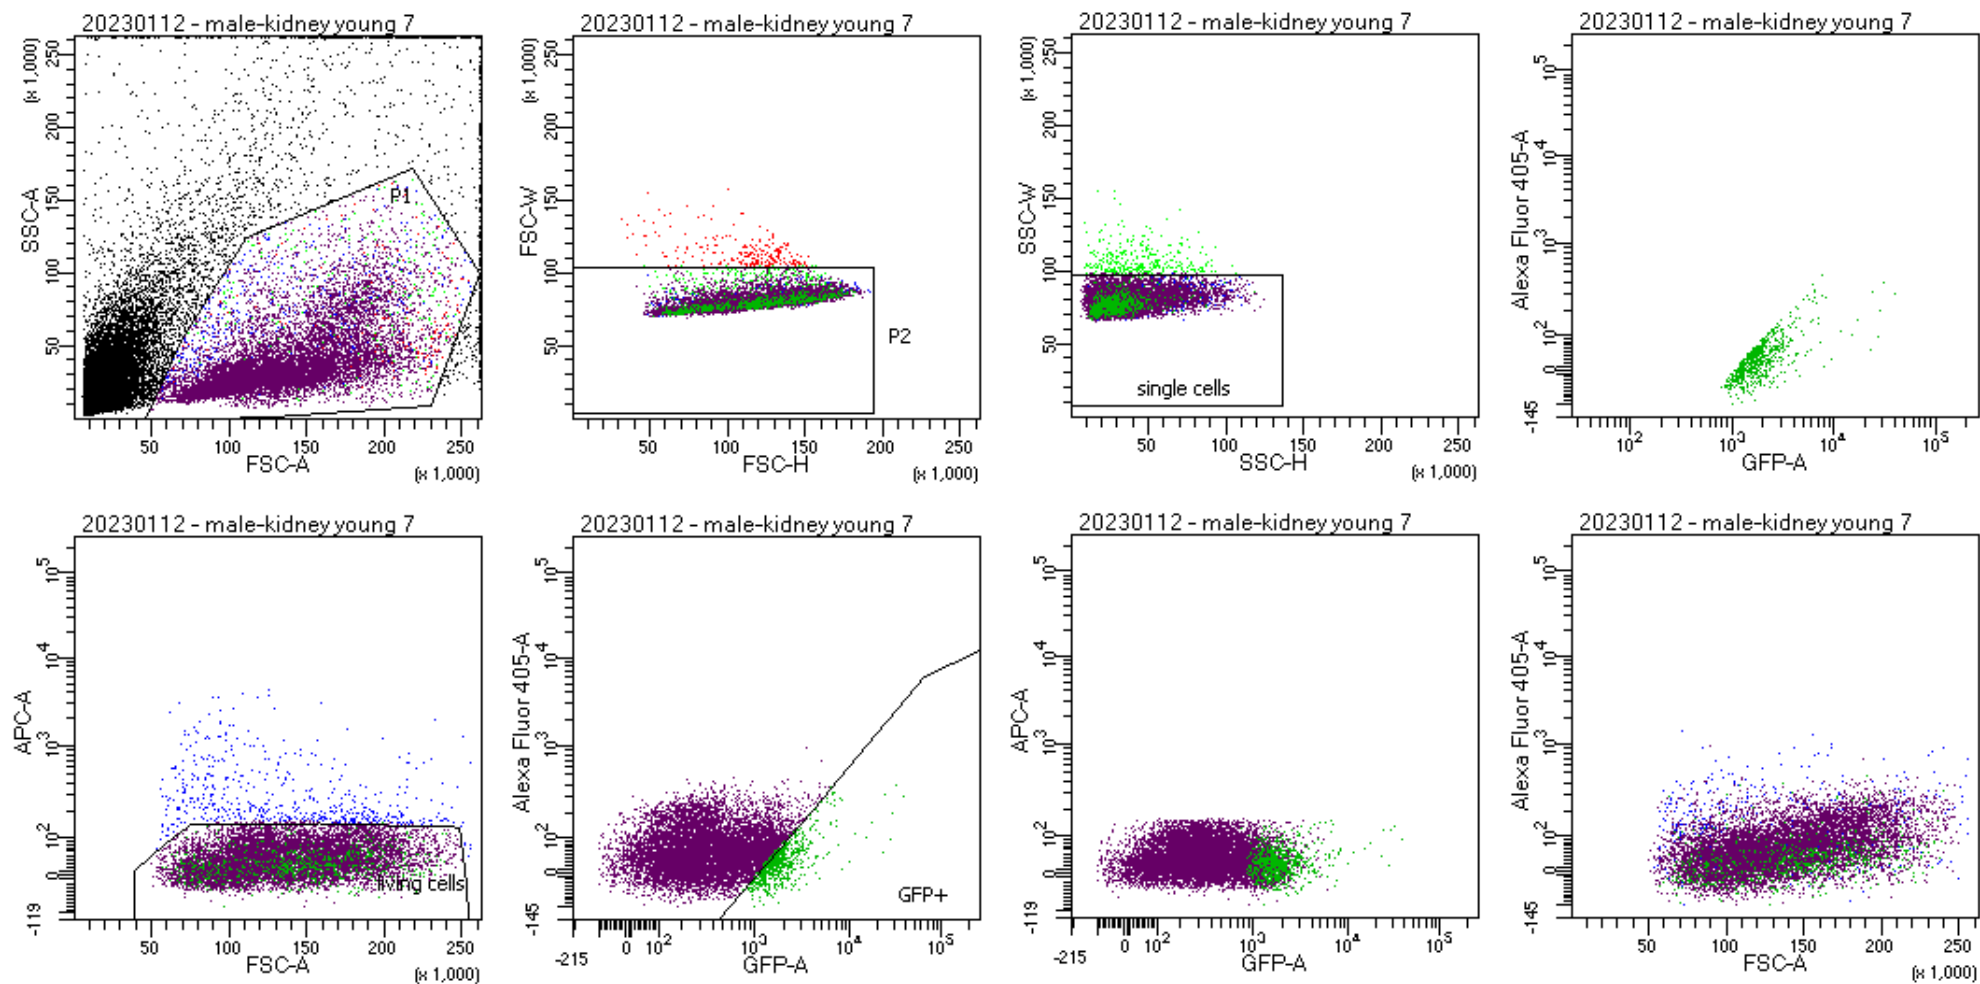

Tube: kidney young 7

| Population   | #Events | %Parent | %Total |
|--------------|---------|---------|--------|
| All Events   | 30,663  | ####    | 100.0  |
| P1           | 11,081  | 36.1    | 36.1   |
| P2           | 10,860  | 98.0    | 35.4   |
| single cells | 10,534  | 97.0    | 34.4   |
| living cells | 10,000  | 94.9    | 32.6   |
| GFP+         | 686     | 6.9     | 2.2    |

## BD FACSDiva 9.0.1

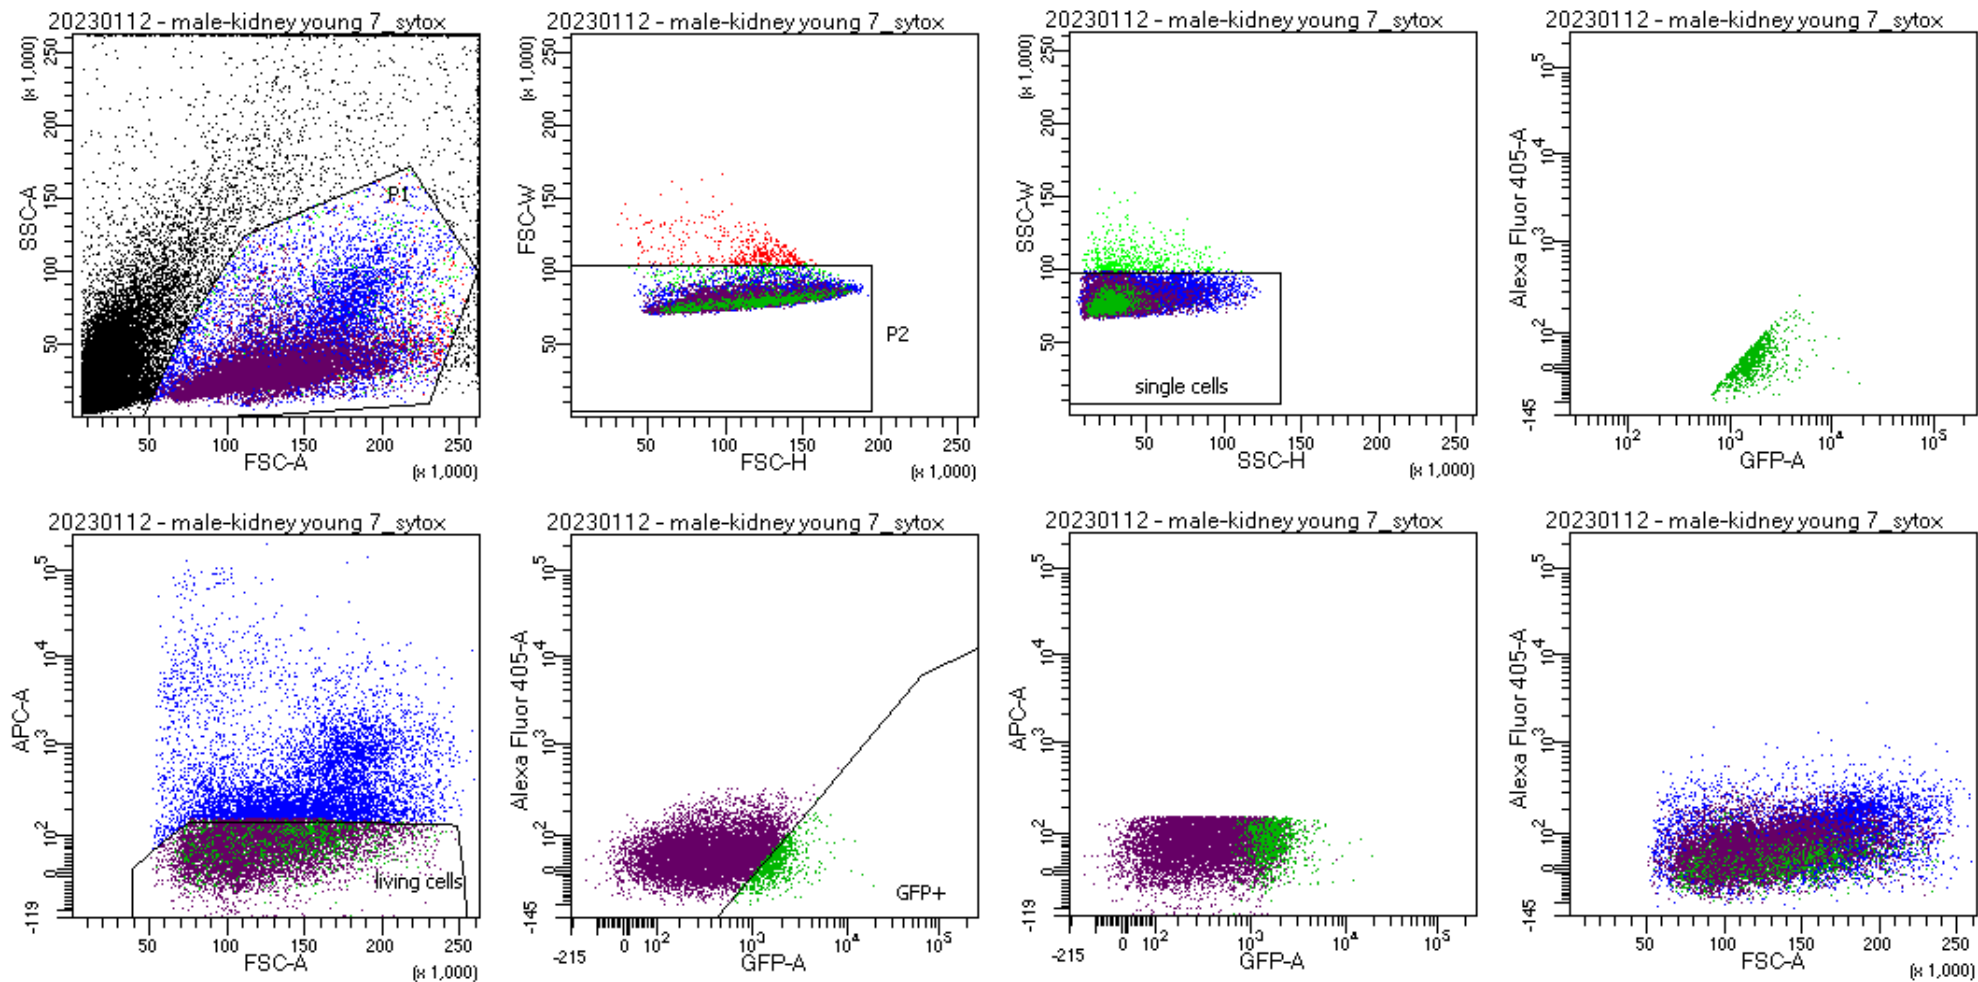

Tube: kidney young 7\_sytox

| Population   | #Events | %Parent | %Total |
|--------------|---------|---------|--------|
| All Events   | 52,491  | ####    | 100.0  |
| P1           | 18,389  | 35.0    | 35.0   |
| P2           | 17,966  | 97.7    | 34.2   |
| single cells | 17,453  | 97.1    | 33.2   |
| living cells | 10,000  | 57.3    | 19.1   |
| GFP+         | 879     | 8.8     | 1.7    |

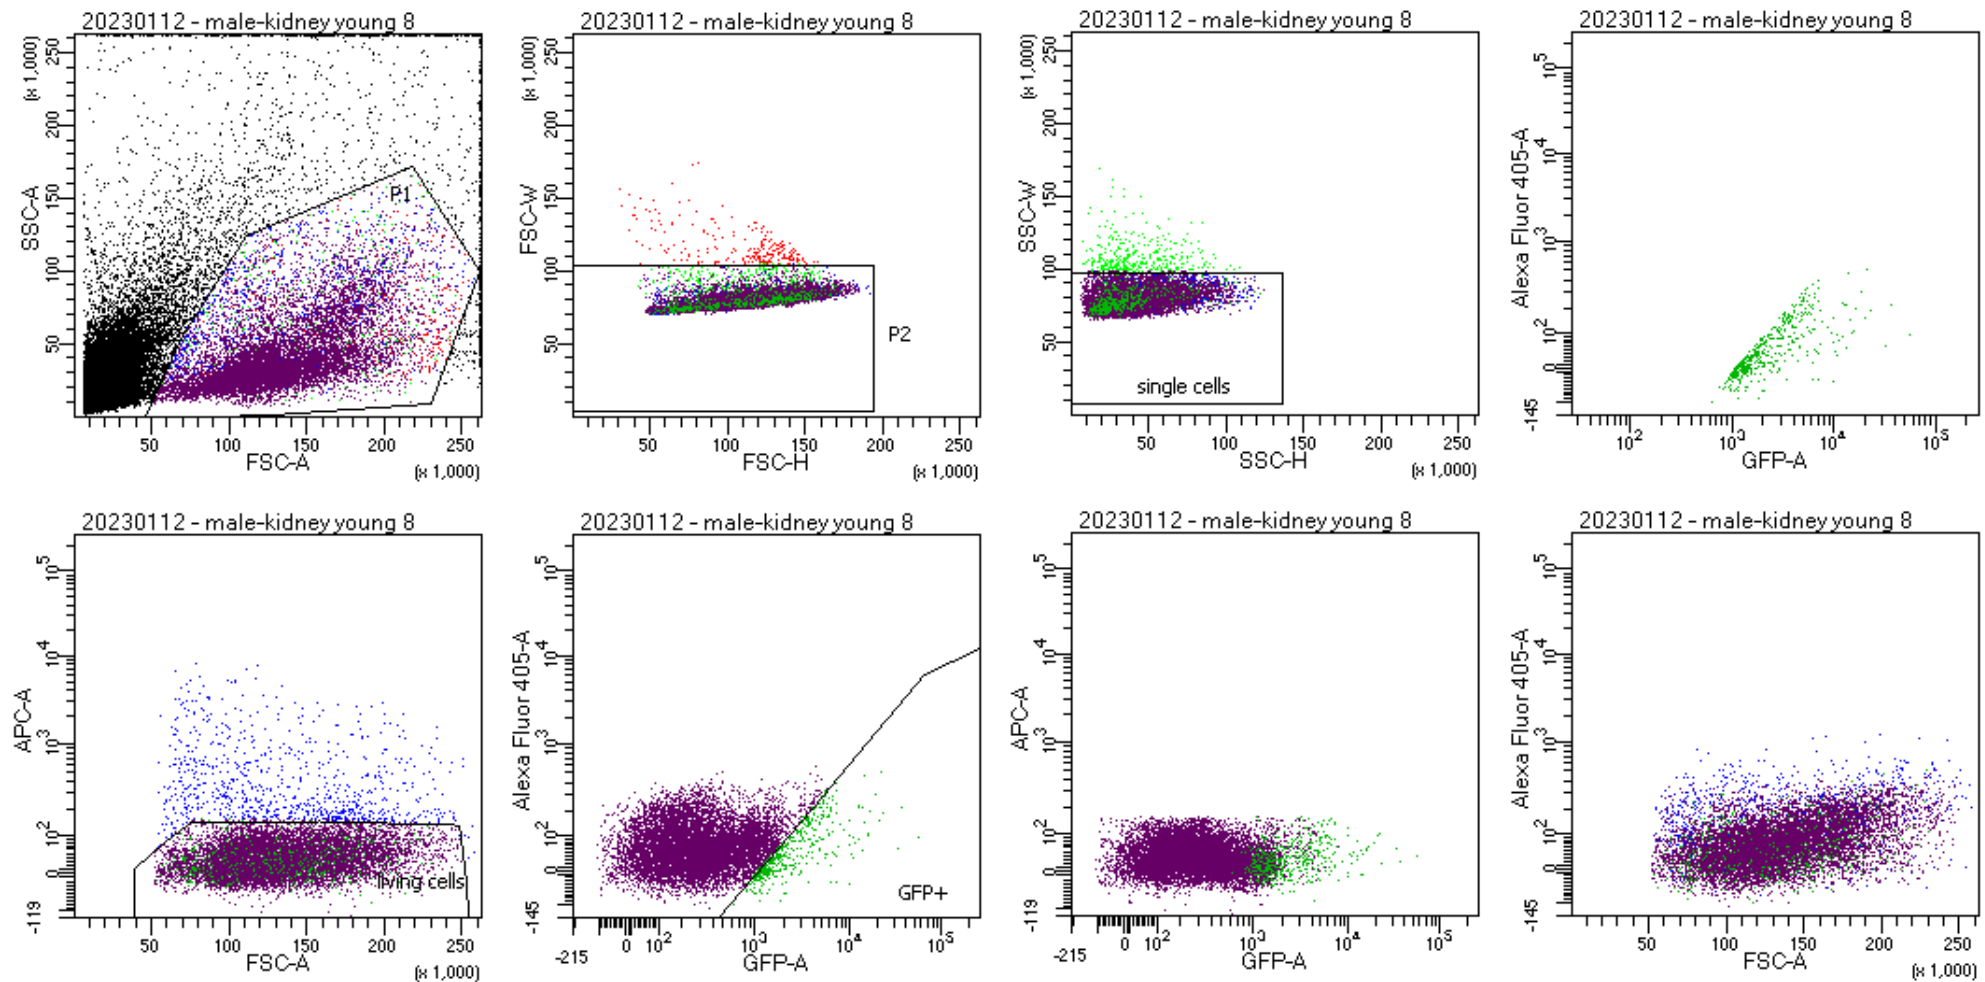

Tube: kidney young 8

| Population   | #Events | %Parent | %Total |
|--------------|---------|---------|--------|
| All Events   | 38,263  | ####    | 100.0  |
| P1           | 11,377  | 29.7    | 29.7   |
| P2           | 11,146  | 98.0    | 29.1   |
| single cells | 10,793  | 96.8    | 28.2   |
| living cells | 10,000  | 92.7    | 26.1   |
| GFP+         | 426     | 4.3     | 1.1    |

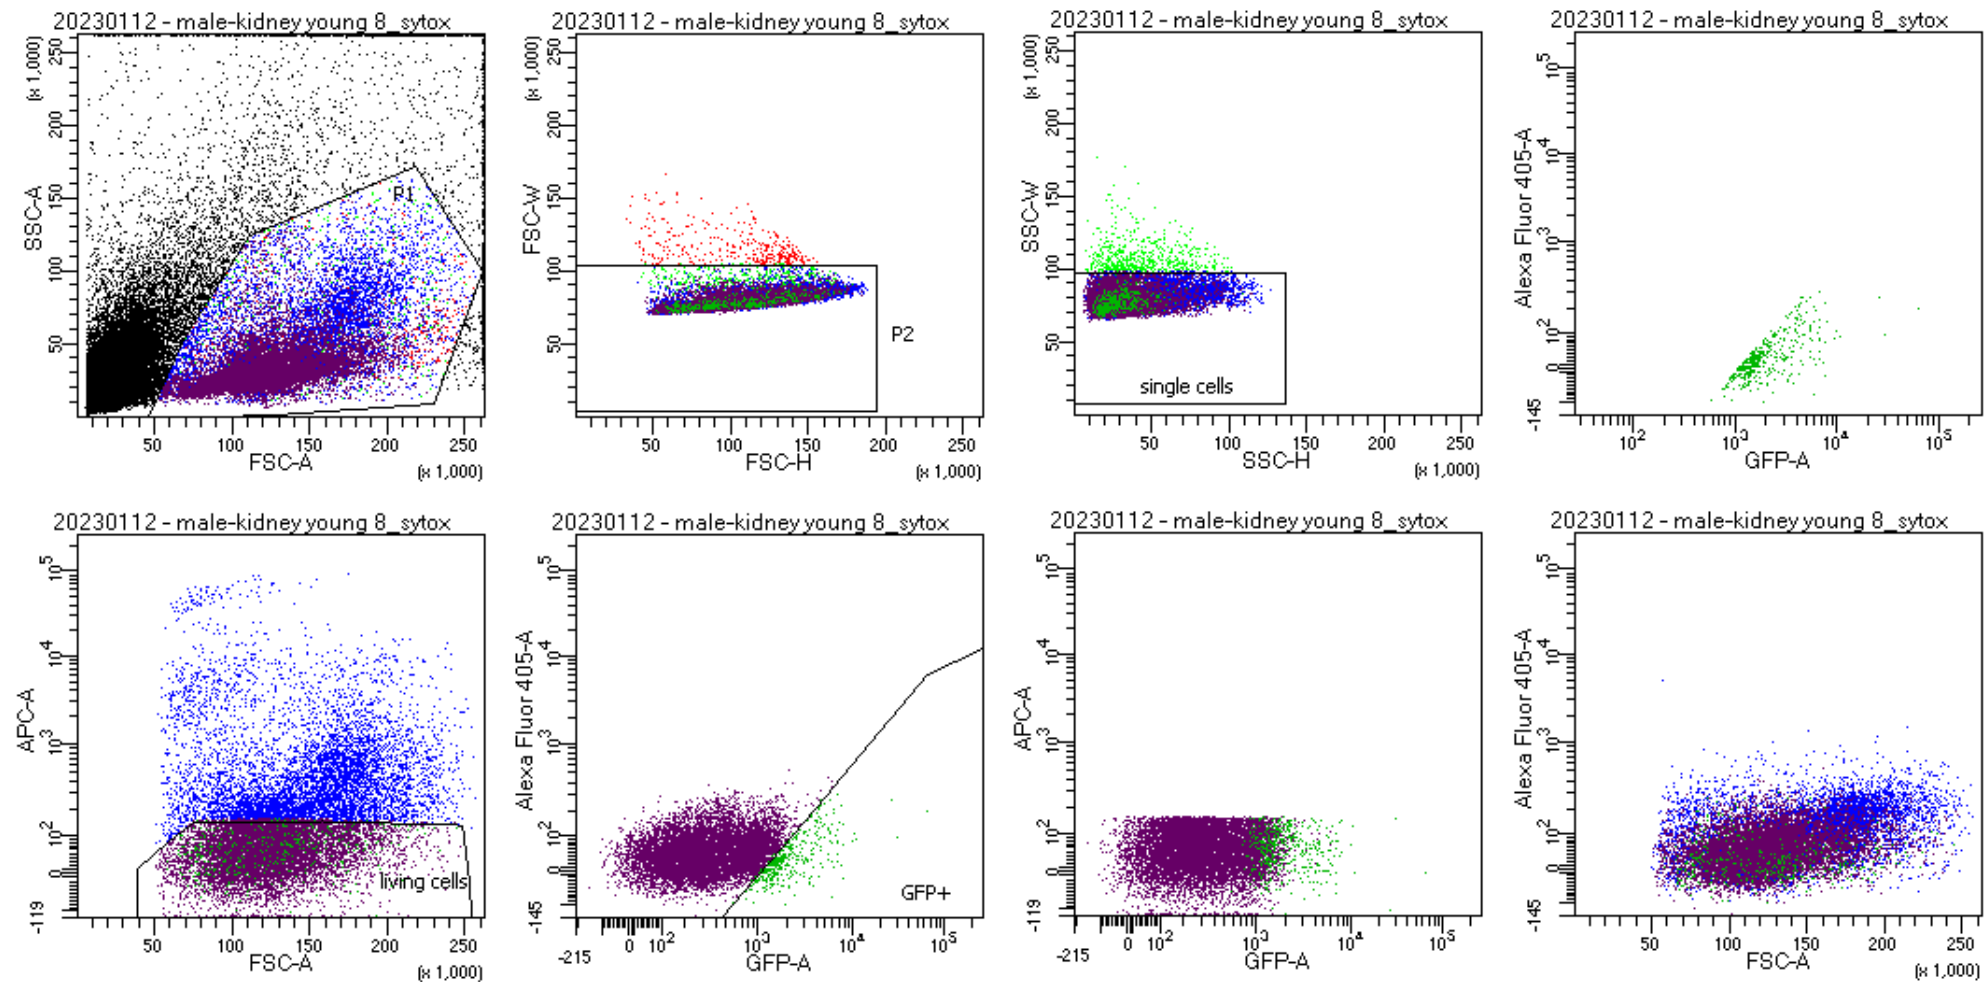

Tube: kidney young 8\_sytox

| Population   | #Events | %Parent | %Total |
|--------------|---------|---------|--------|
| All Events   | 58,074  | ####    | 100.0  |
| P1           | 17,067  | 29.4    | 29.4   |
| P2           | 16,732  | 98.0    | 28.8   |
| single cells | 16,167  | 96.6    | 27.8   |
| living cells | 10,000  | 61.9    | 17.2   |
| GFP+         | 409     | 4.1     | 0.7    |



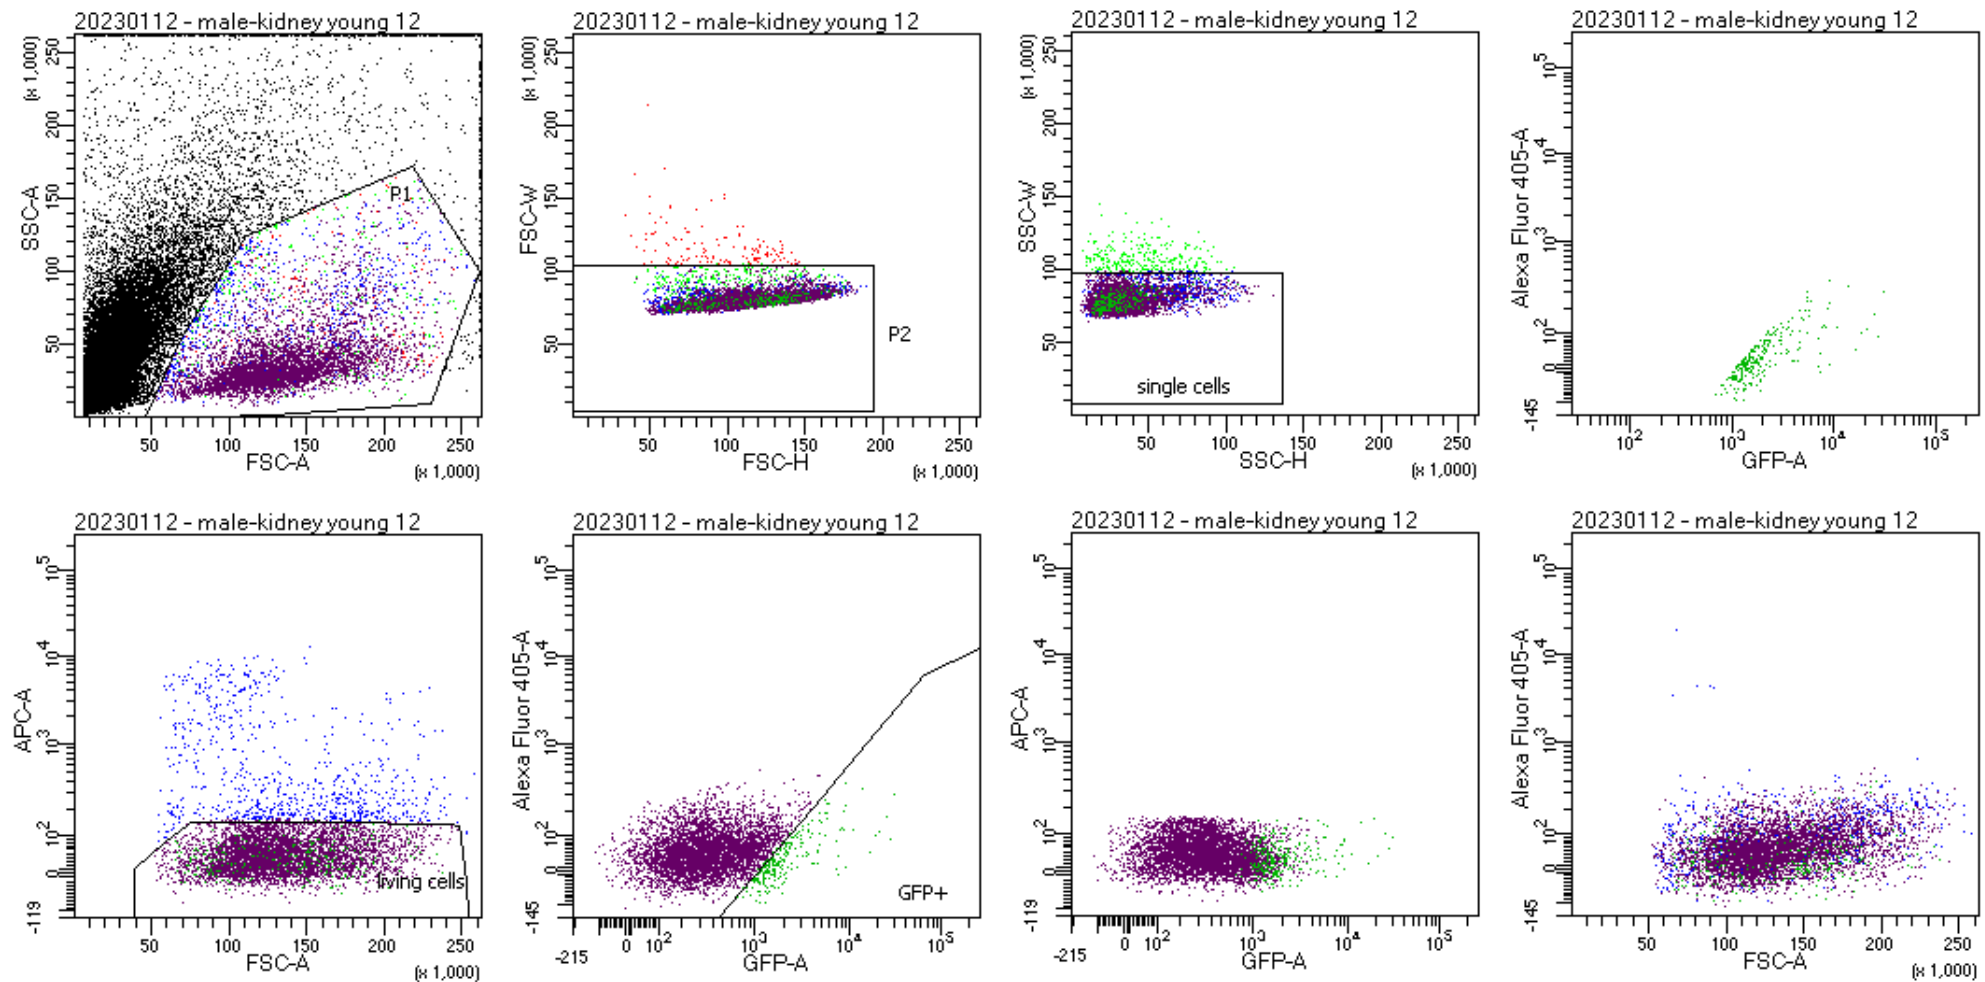

Tube: kidney young 12

| Population   | #Events | %Parent | %Total |
|--------------|---------|---------|--------|
| All Events   | 58,459  | ####    | 100.0  |
| P1           | 6,181   | 10.6    | 10.6   |
| P2           | 6,048   | 97.8    | 10.3   |
| single cells | 5,773   | 95.5    | 9.9    |
| living cells | 5,003   | 86.7    | 8.6    |
| GFP+         | 256     | 5.1     | 0.4    |

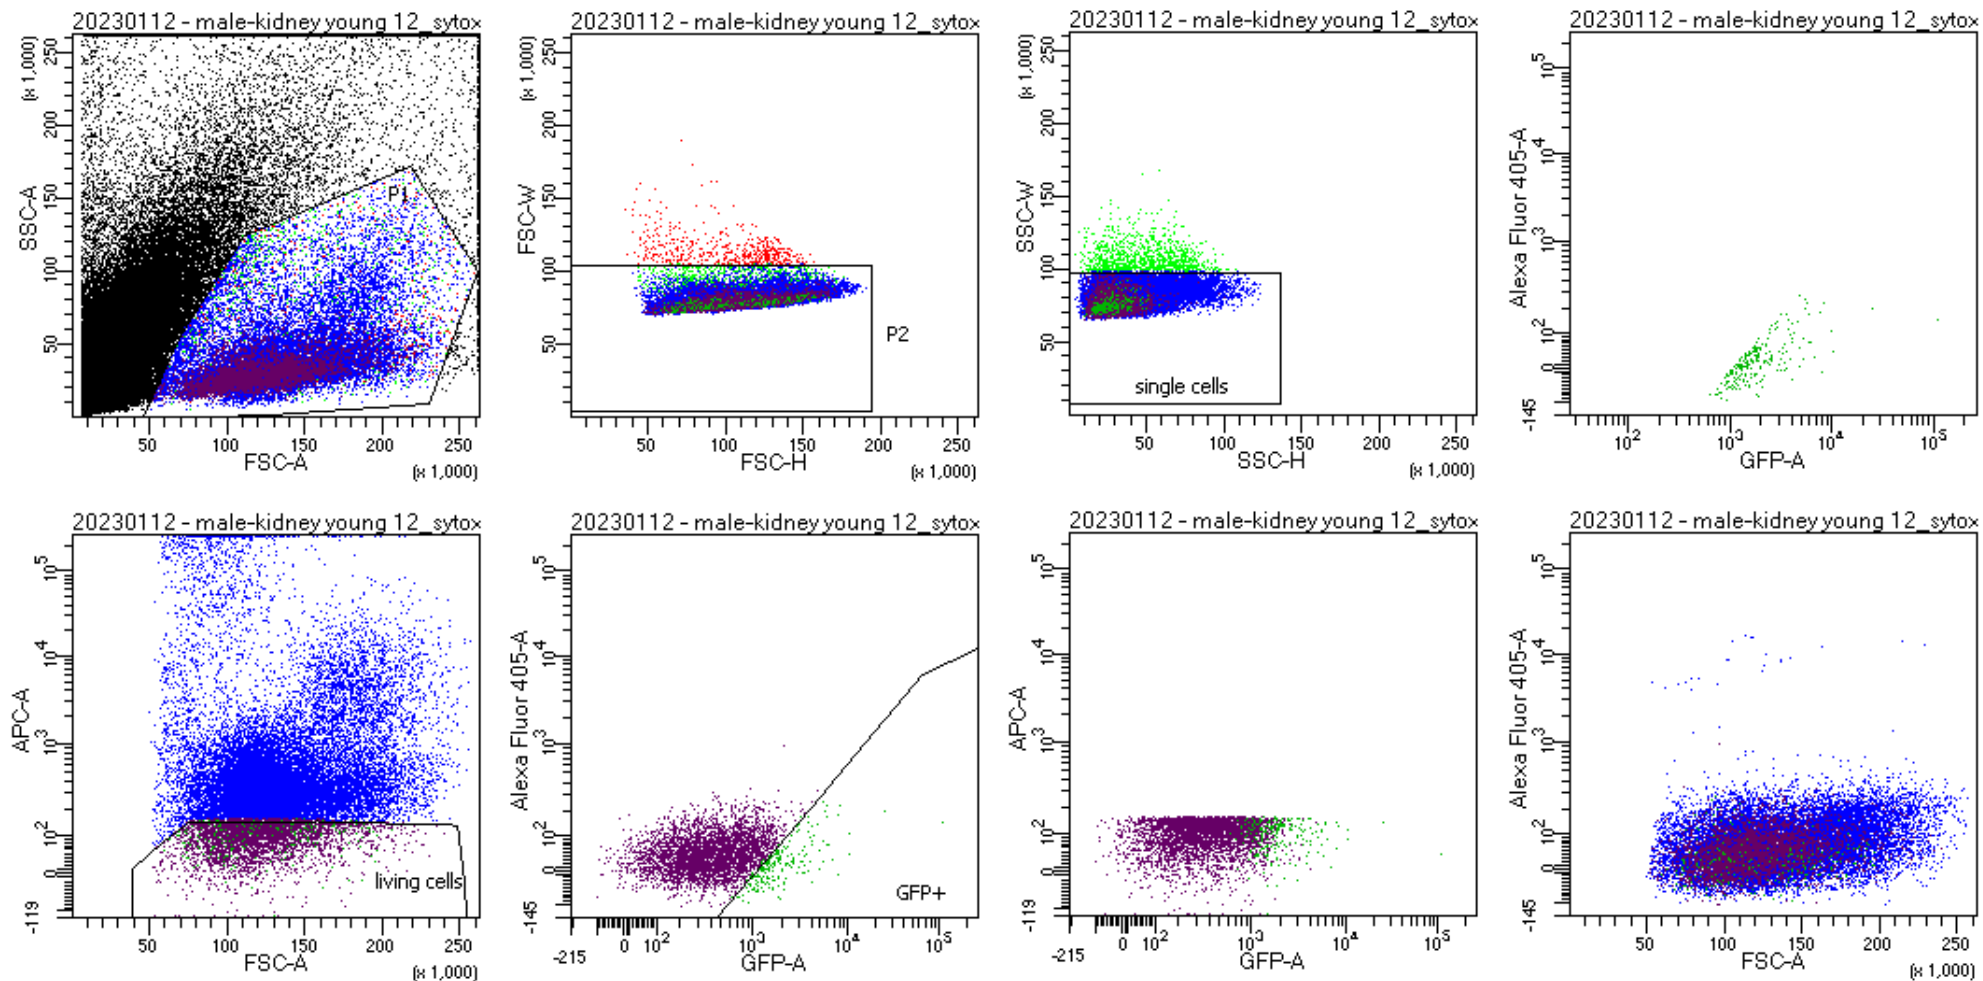

Tube: kidney young 12\_sytox

| Population   | #Events | %Parent | %Total |
|--------------|---------|---------|--------|
| All Events   | 210,179 | ####    | 100.0  |
| P1           | 23,356  | 11.1    | 11.1   |
| P2           | 22,885  | 98.0    | 10.9   |
| single cells | 21,899  | 95.7    | 10.4   |
| living cells | 4,072   | 18.6    | 1.9    |
| GFP+         | 220     | 5.4     | 0.1    |
