# Supplementary material for: Generation of a transparent killifish line through multiplex CRISPR/Cas9mediated gene inactivation
Source: eLife journal article supplement (doi:10.7554/elife.81549), 2023-02-23
Supplement: fig5-data1 [file elife-81549-fig5-data1-v3.zip]

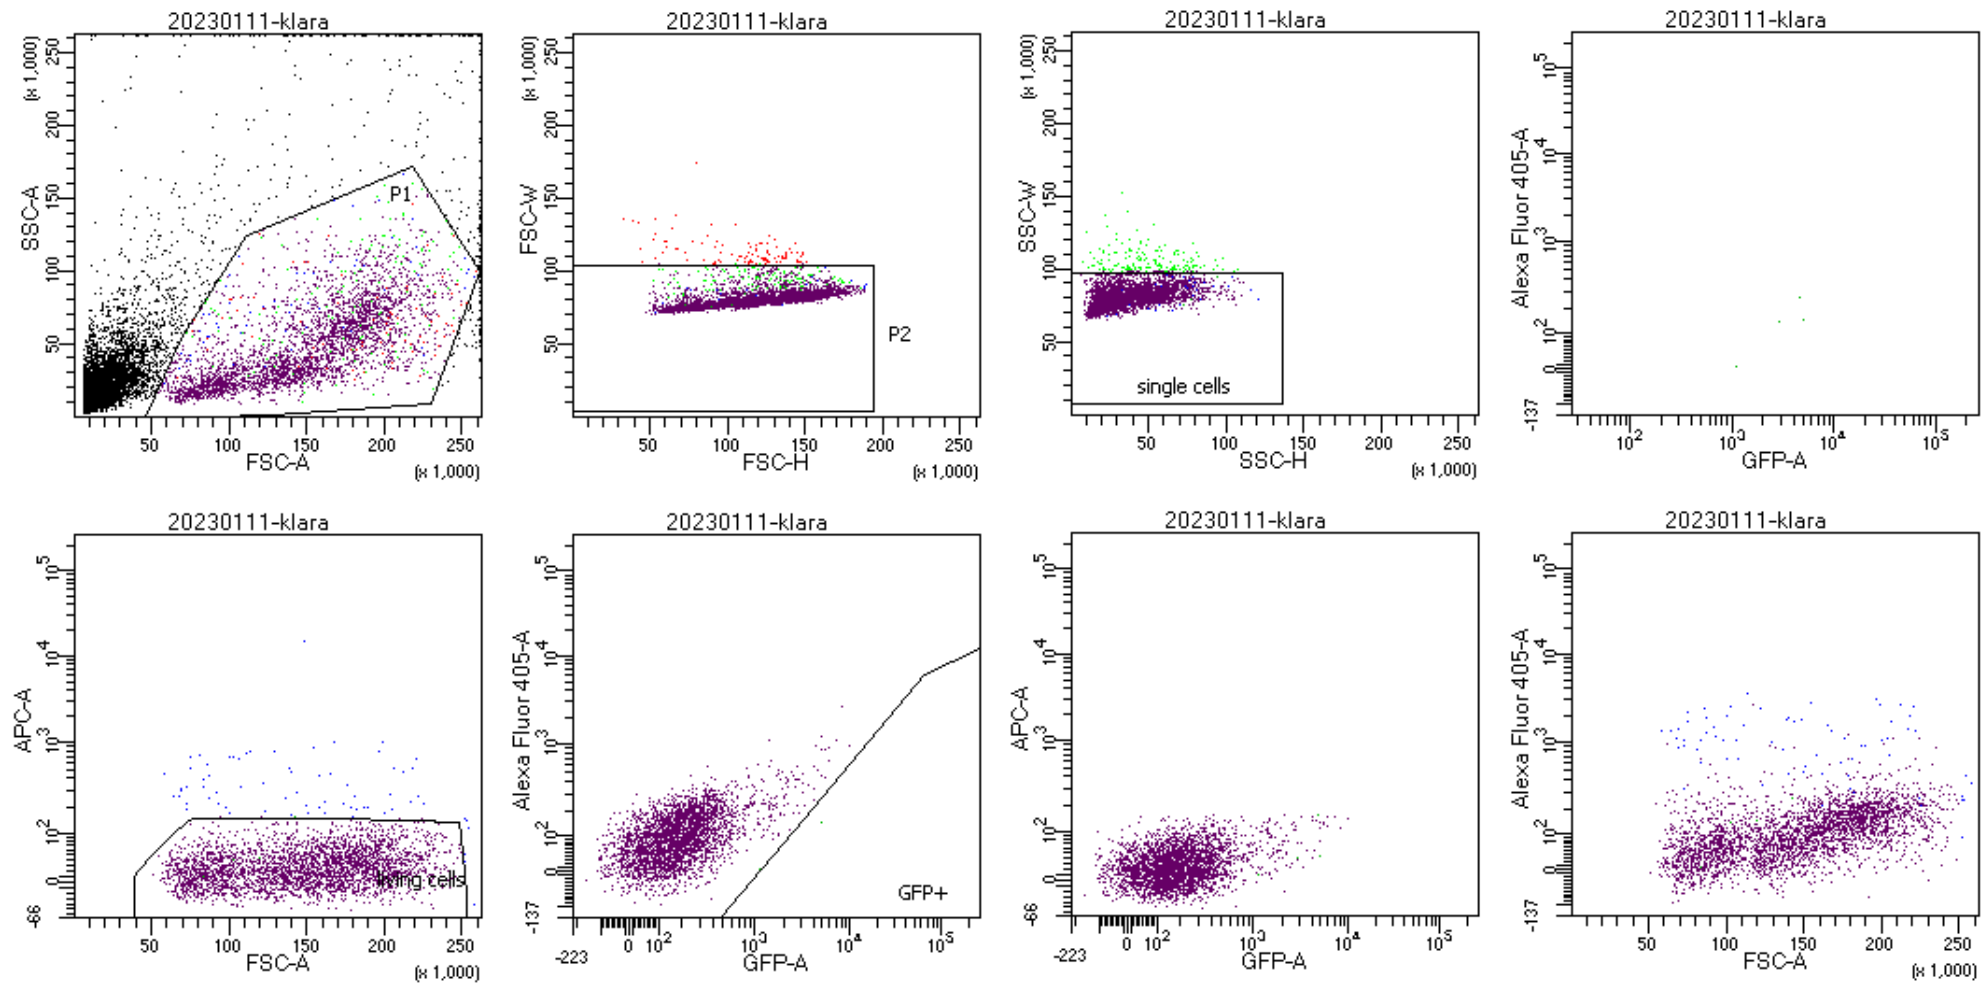

Tube: klara

| Population   | #Events | %Parent | %Total |
|--------------|---------|---------|--------|
| All Events   | 10,000  | ####    | 100.0  |
| P1           | 3,355   | 33.6    | 33.6   |
| P2           | 3,253   | 97.0    | 32.5   |
| single cells | 3,085   | 94.8    | 30.8   |
| living cells | 3,014   | 97.7    | 30.1   |
| GFP+         | 4       | 0.1     | 0.0    |

# BD FACSDiva 9.0.1

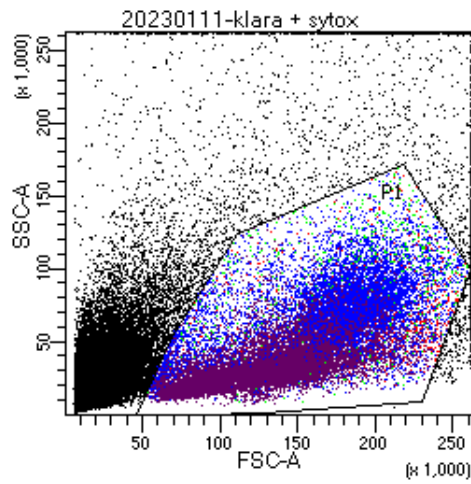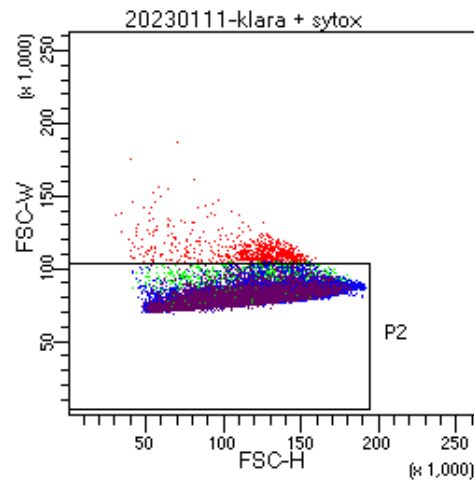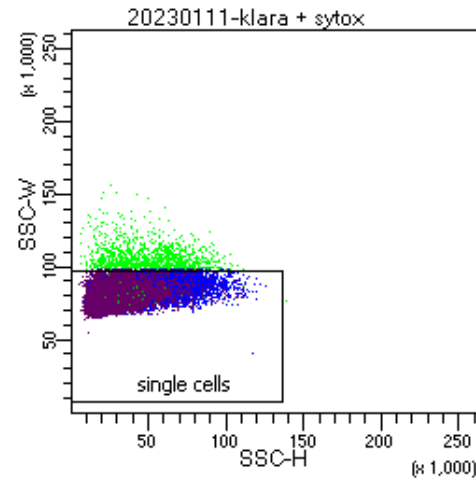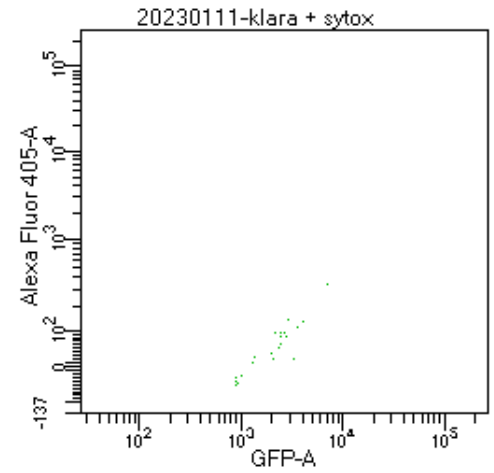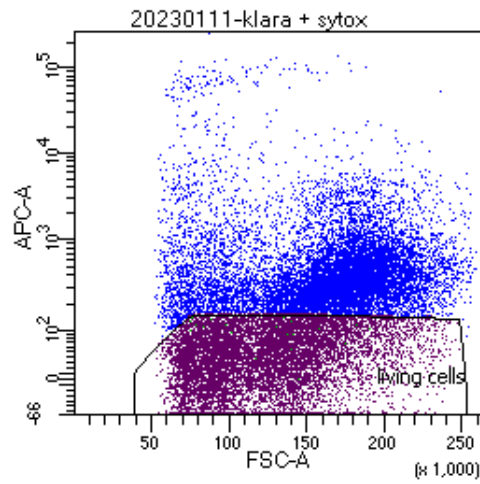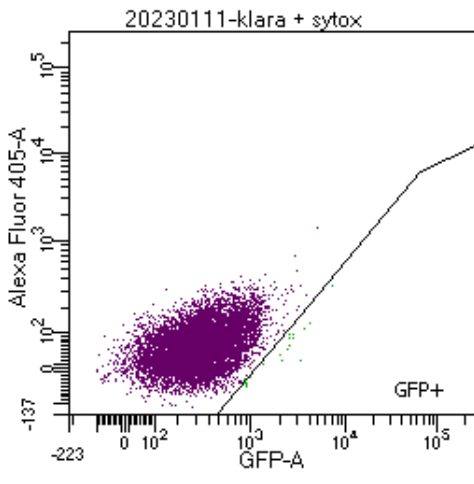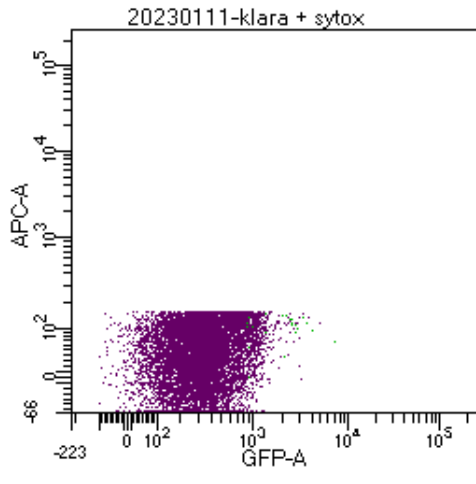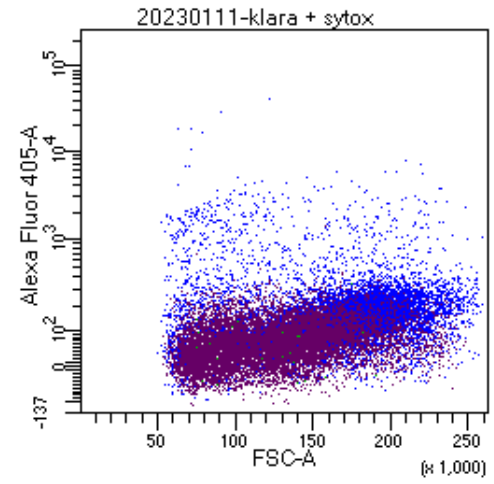

Tube: klara + sytox

| Population   | #Events | %Parent | %Total |
|--------------|---------|---------|--------|
| All Events   | 70,503  | ####    | 100.0  |
| P1           | 23,403  | 33.2    | 33.2   |
| P2           | 22,688  | 96.9    | 32.2   |
| single cells | 21,503  | 94.8    | 30.5   |
| living cells | 9,999   | 46.5    | 14.2   |
| GFP+         | 22      | 0.2     | 0.0    |

## BD FACSDiva 9.0.1

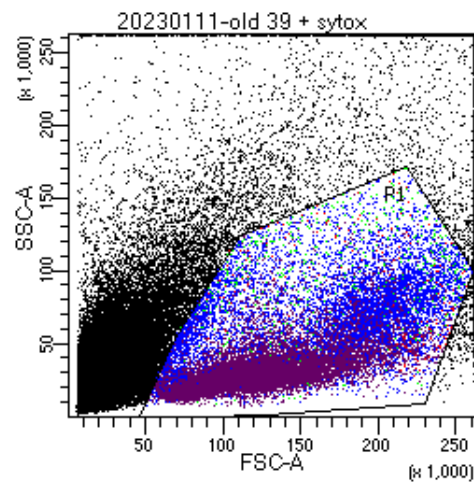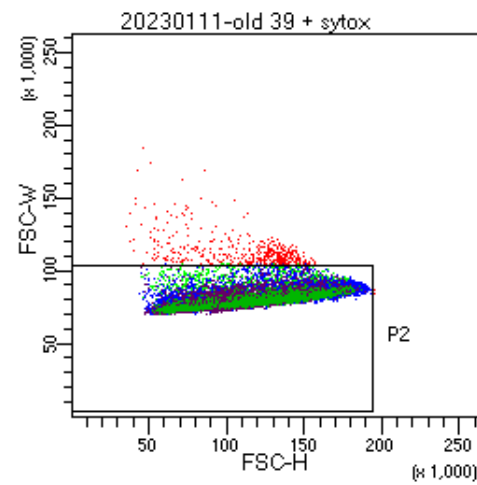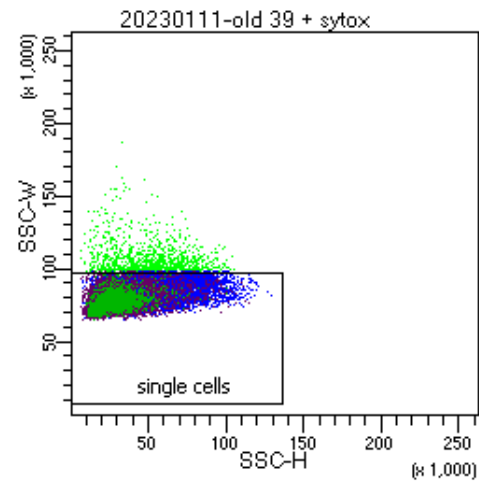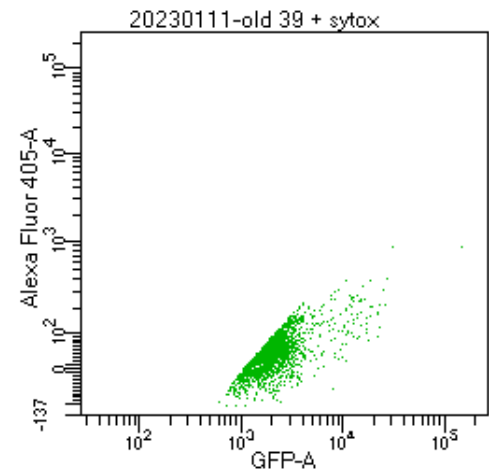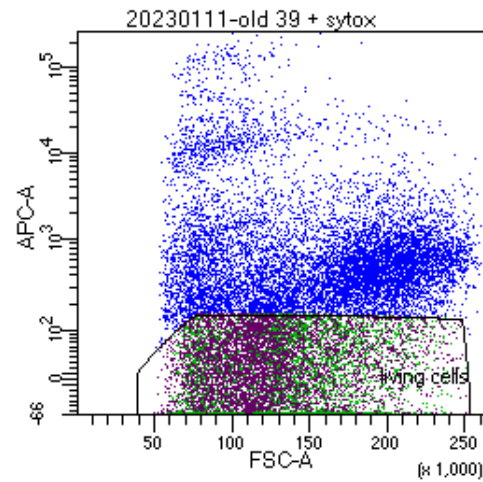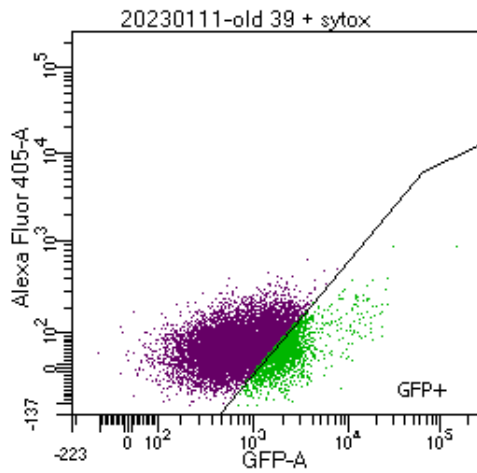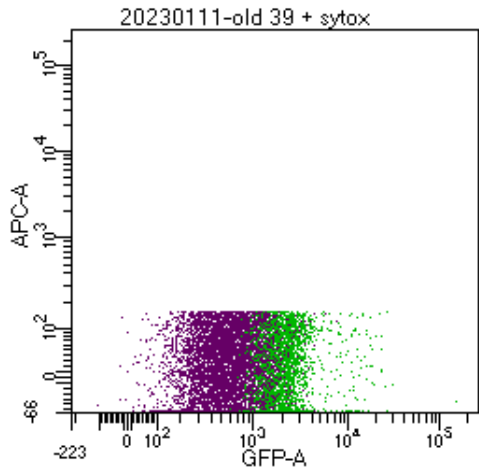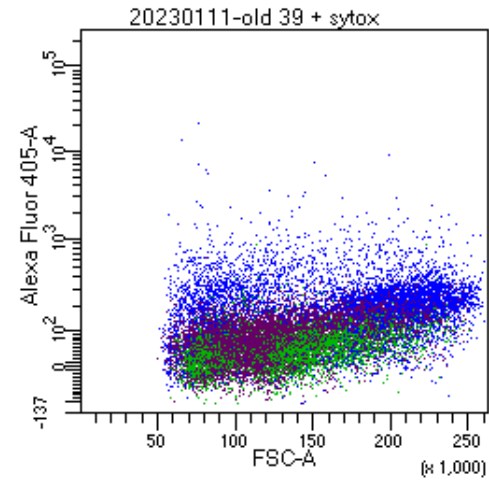

Tube: old 39 + sytox

| Population   | #Events | %Parent | %Total |
|--------------|---------|---------|--------|
| All Events   | 112,169 | ####    | 100.0  |
| P1           | 21,406  | 19.1    | 19.1   |
| P2           | 20,955  | 97.9    | 18.7   |
| single cells | 19,909  | 95.0    | 17.7   |
| living cells | 9,986   | 50.2    | 8.9    |
| GFP+         | 1,908   | 19.1    | 1.7    |

# BD FACSDiva 9.0.1

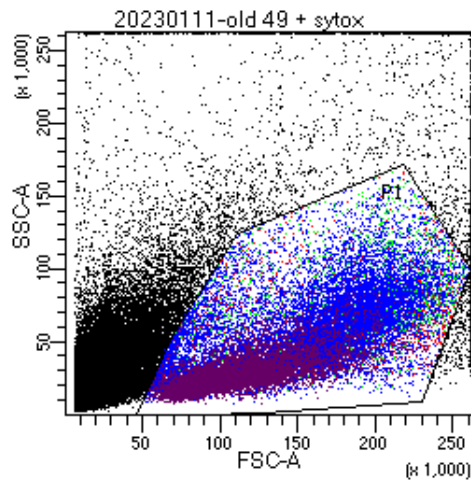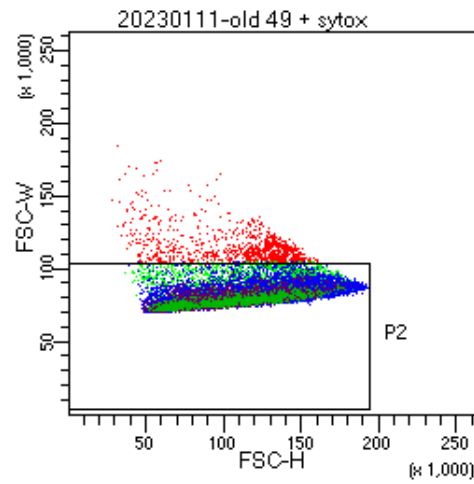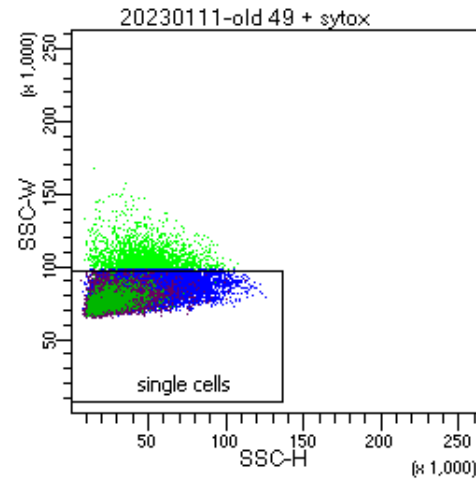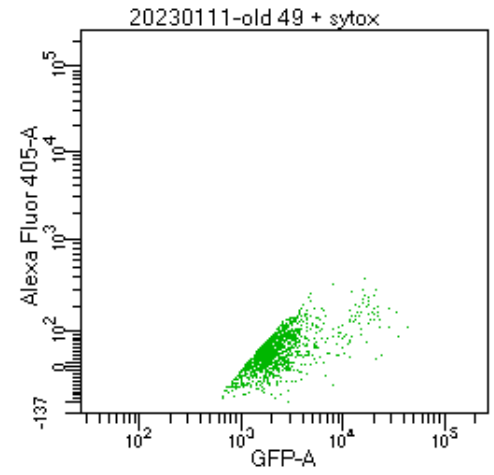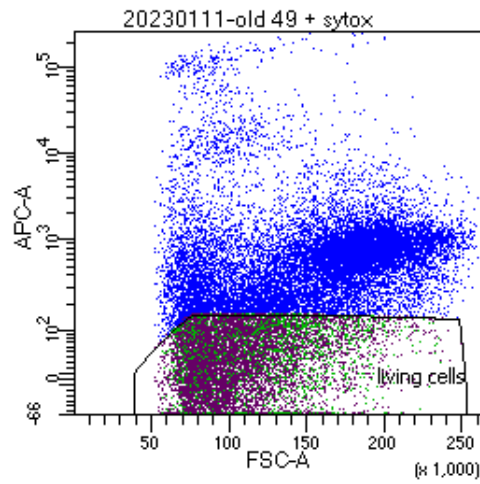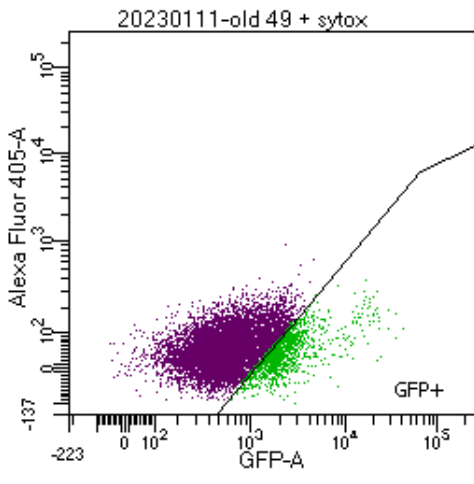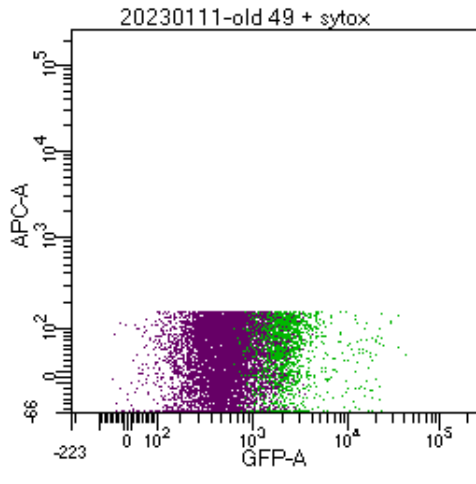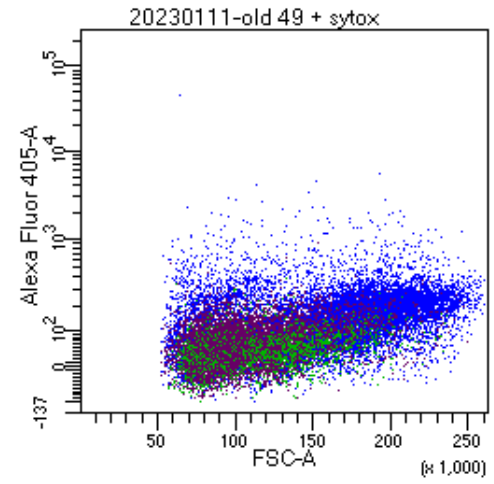

Tube: old 49 + sytox

| Population   | #Events | %Parent | %Total |
|--------------|---------|---------|--------|
| All Events   | 95,664  | ####    | 100.0  |
| P1           | 27,525  | 28.8    | 28.8   |
| P2           | 26,554  | 96.5    | 27.8   |
| single cells | 24,544  | 92.4    | 25.7   |
| living cells | 9,994   | 40.7    | 10.4   |
| GFP+         | 1,285   | 12.9    | 1.3    |

# BD FACSDiva 9.0.1

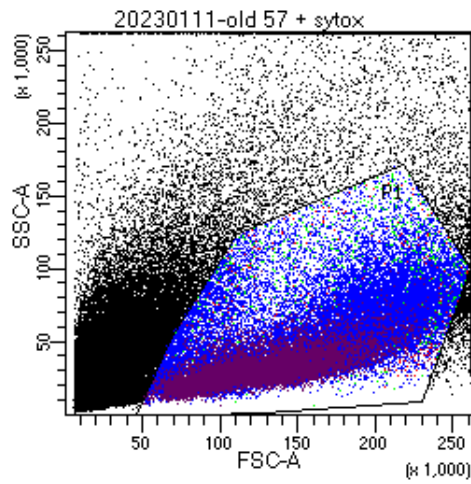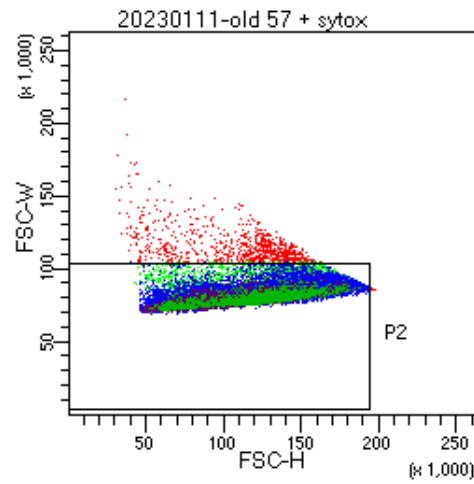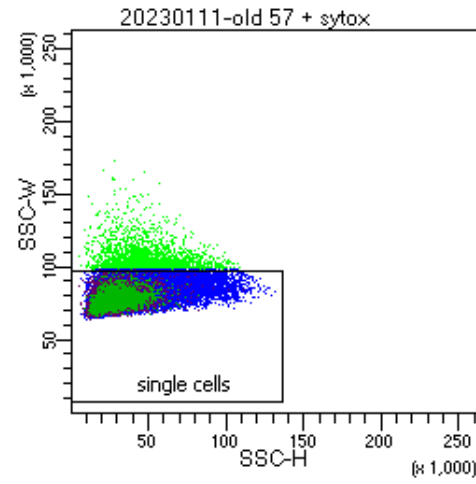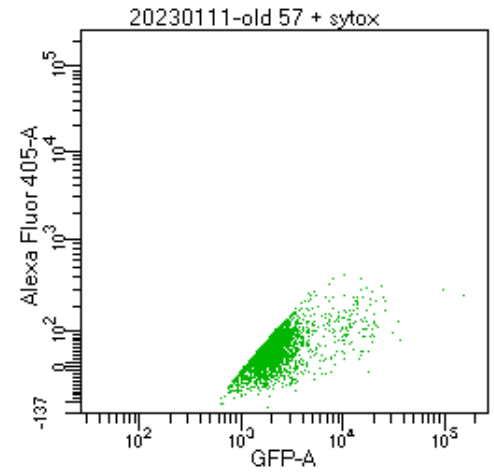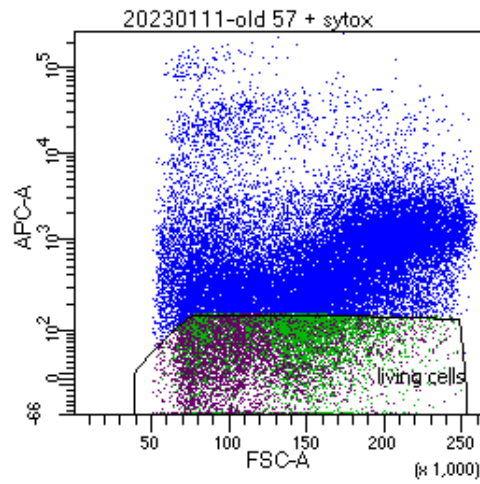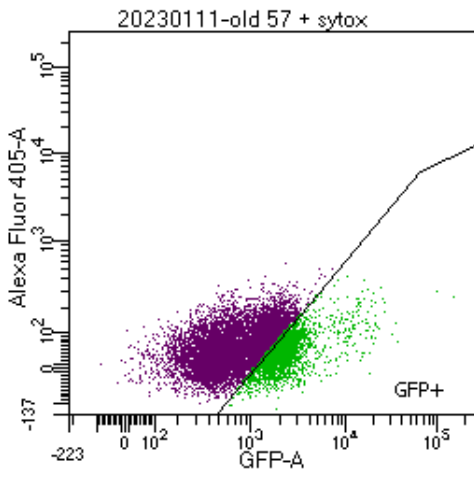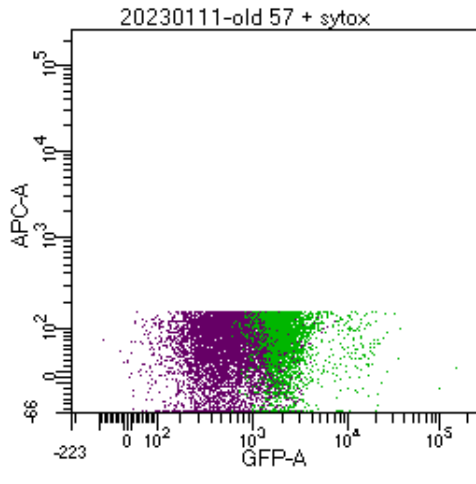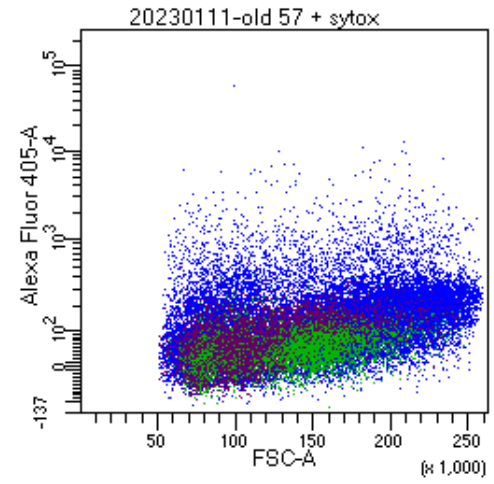

Tube: old 57 + sytox

| Population   | #Events | %Parent | %Total |
|--------------|---------|---------|--------|
| All Events   | 156,800 | ####    | 100.0  |
| P1           | 38,013  | 24.2    | 24.2   |
| P2           | 37,134  | 97.7    | 23.7   |
| single cells | 34,882  | 93.9    | 22.2   |
| living cells | 9,987   | 28.6    | 6.4    |
| GFP+         | 2,441   | 24.4    | 1.6    |



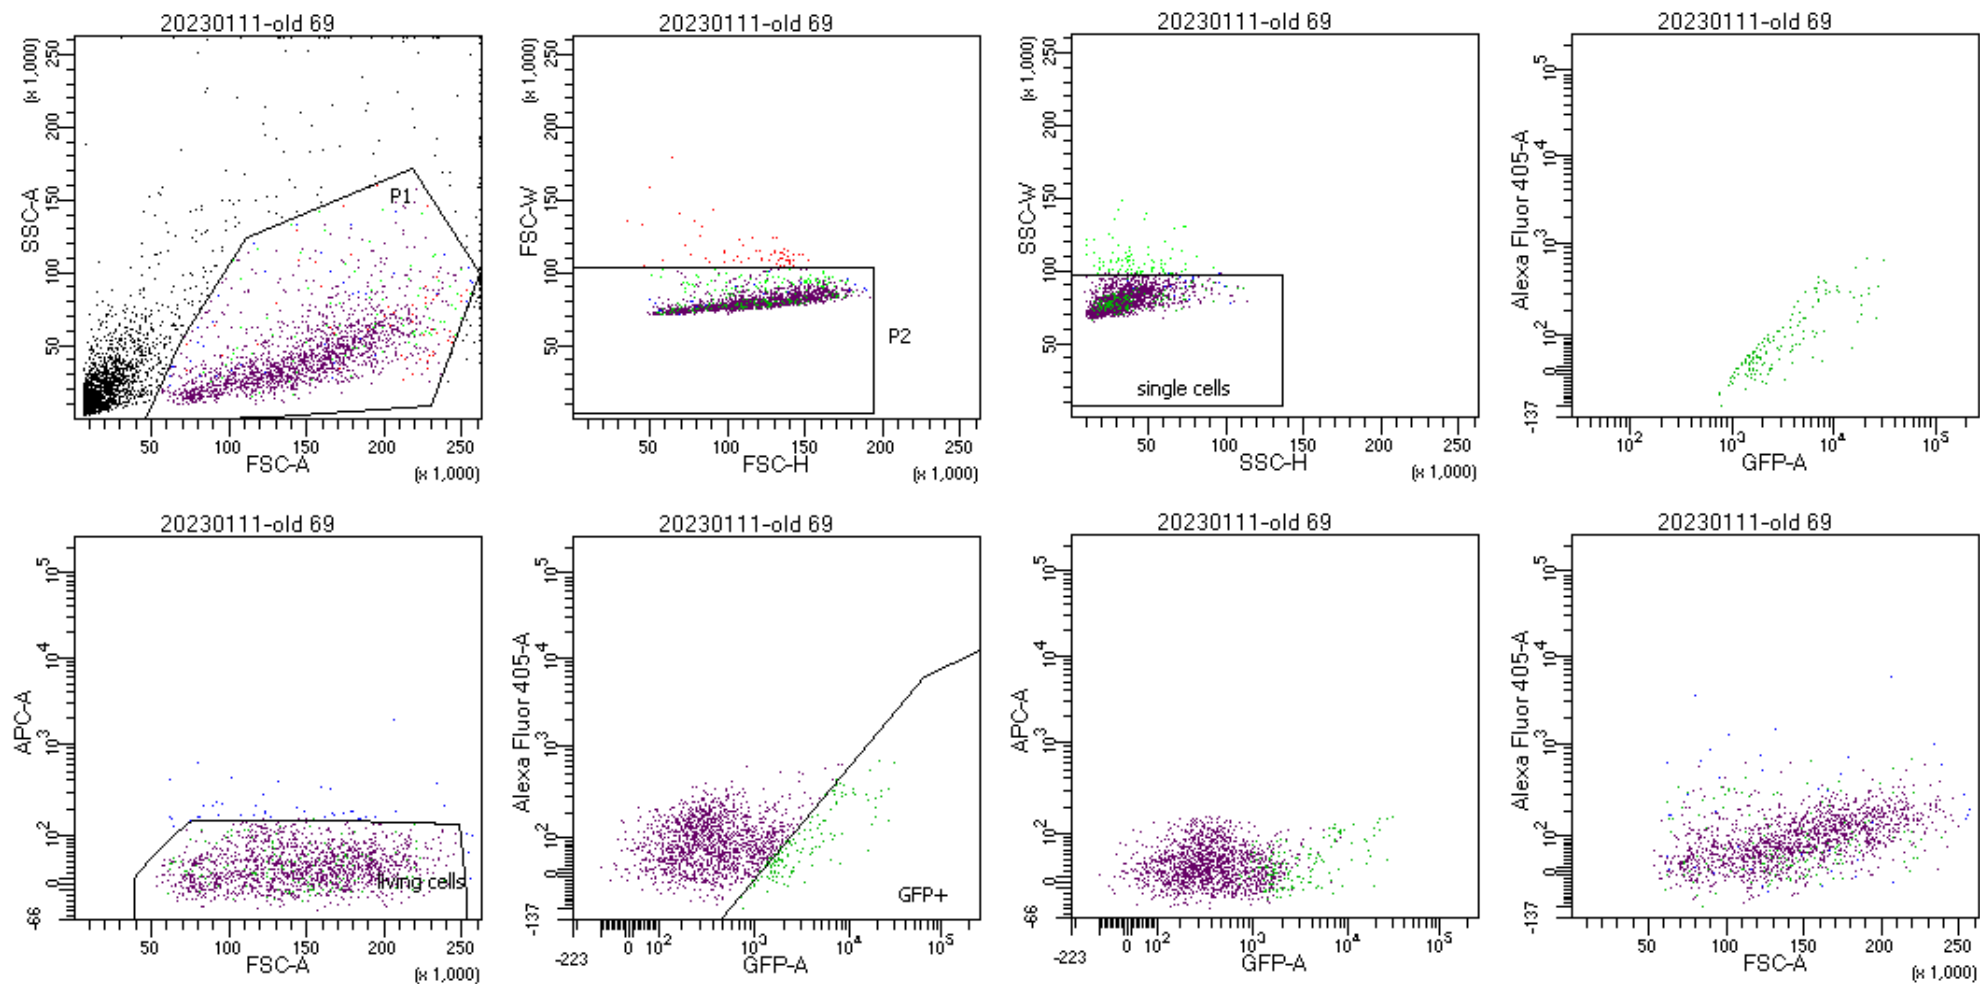

Tube: old 69

| Population   | #Events | %Parent | %Total |
|--------------|---------|---------|--------|
| All Events   | 4,108   | ####    | 100.0  |
| P1           | 1,764   | 42.9    | 42.9   |
| P2           | 1,704   | 96.6    | 41.5   |
| single cells | 1,610   | 94.5    | 39.2   |
| living cells | 1,565   | 97.2    | 38.1   |
| GFP+         | 141     | 9.0     | 3.4    |

# BD FACSDiva 9.0.1

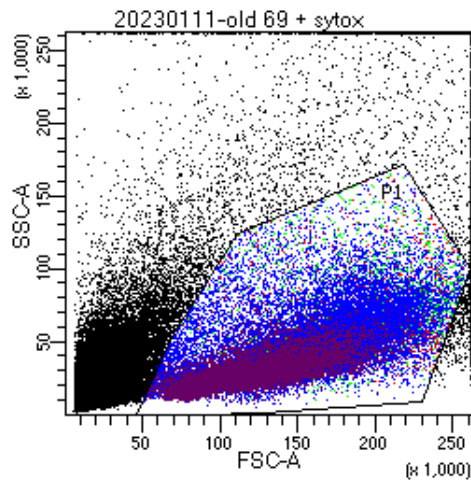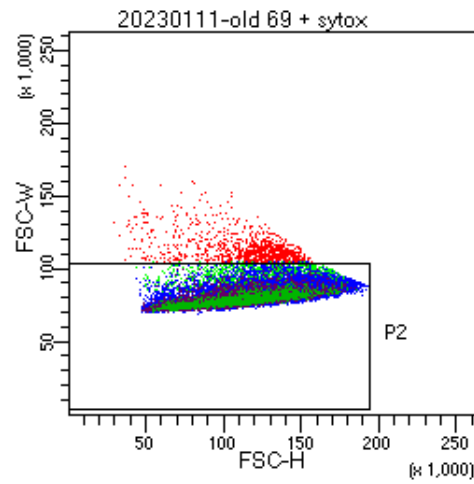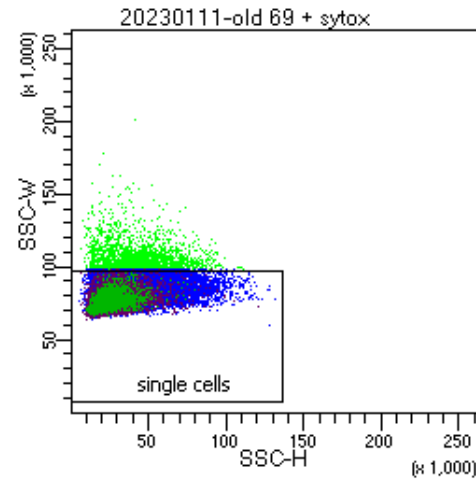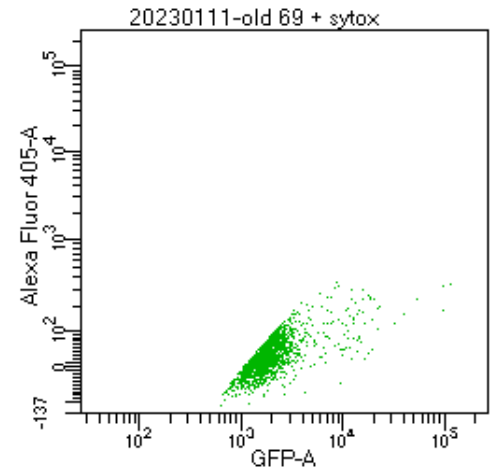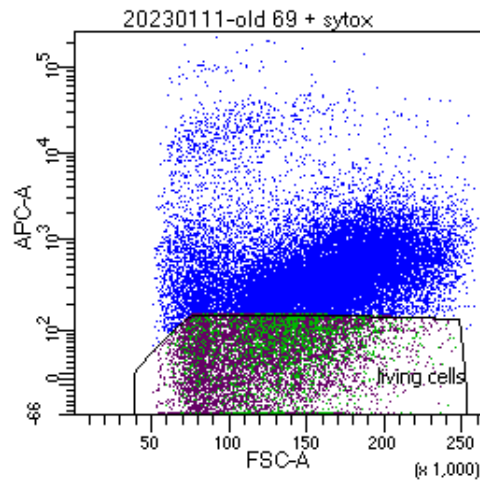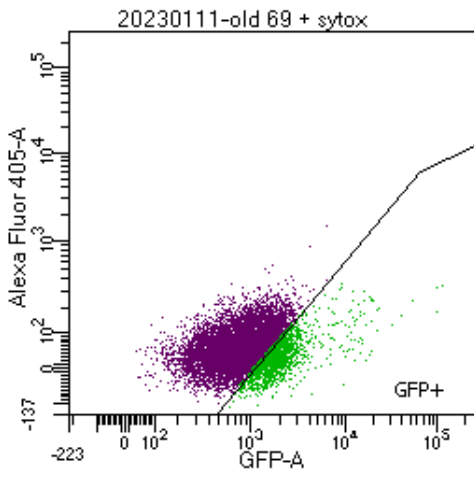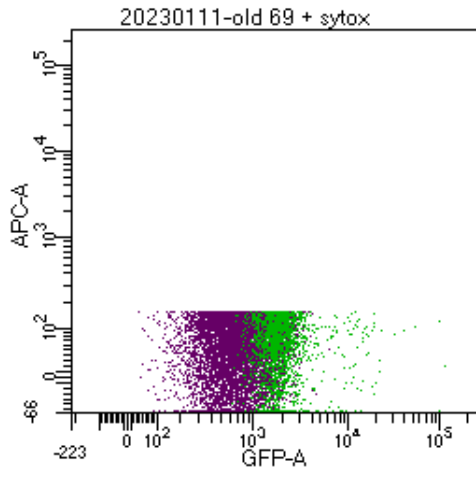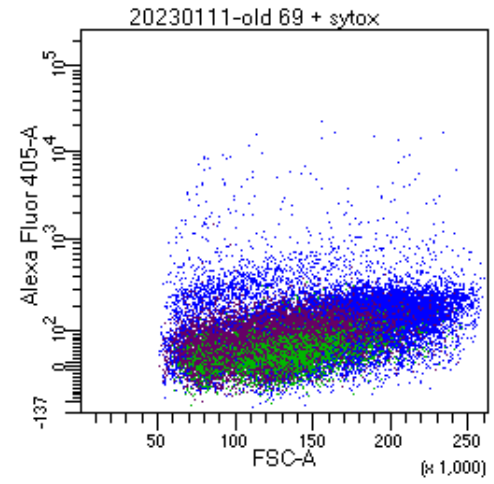

Tube: old 69 + sytox

| Population   | #Events | %Parent | %Total |
|--------------|---------|---------|--------|
| All Events   | 86,908  | ####    | 100.0  |
| P1           | 34,921  | 40.2    | 40.2   |
| P2           | 33,970  | 97.3    | 39.1   |
| single cells | 31,848  | 93.8    | 36.6   |
| living cells | 9,986   | 31.4    | 11.5   |
| GFP+         | 1,724   | 17.3    | 2.0    |

## BD FACSDiva 9.0.1

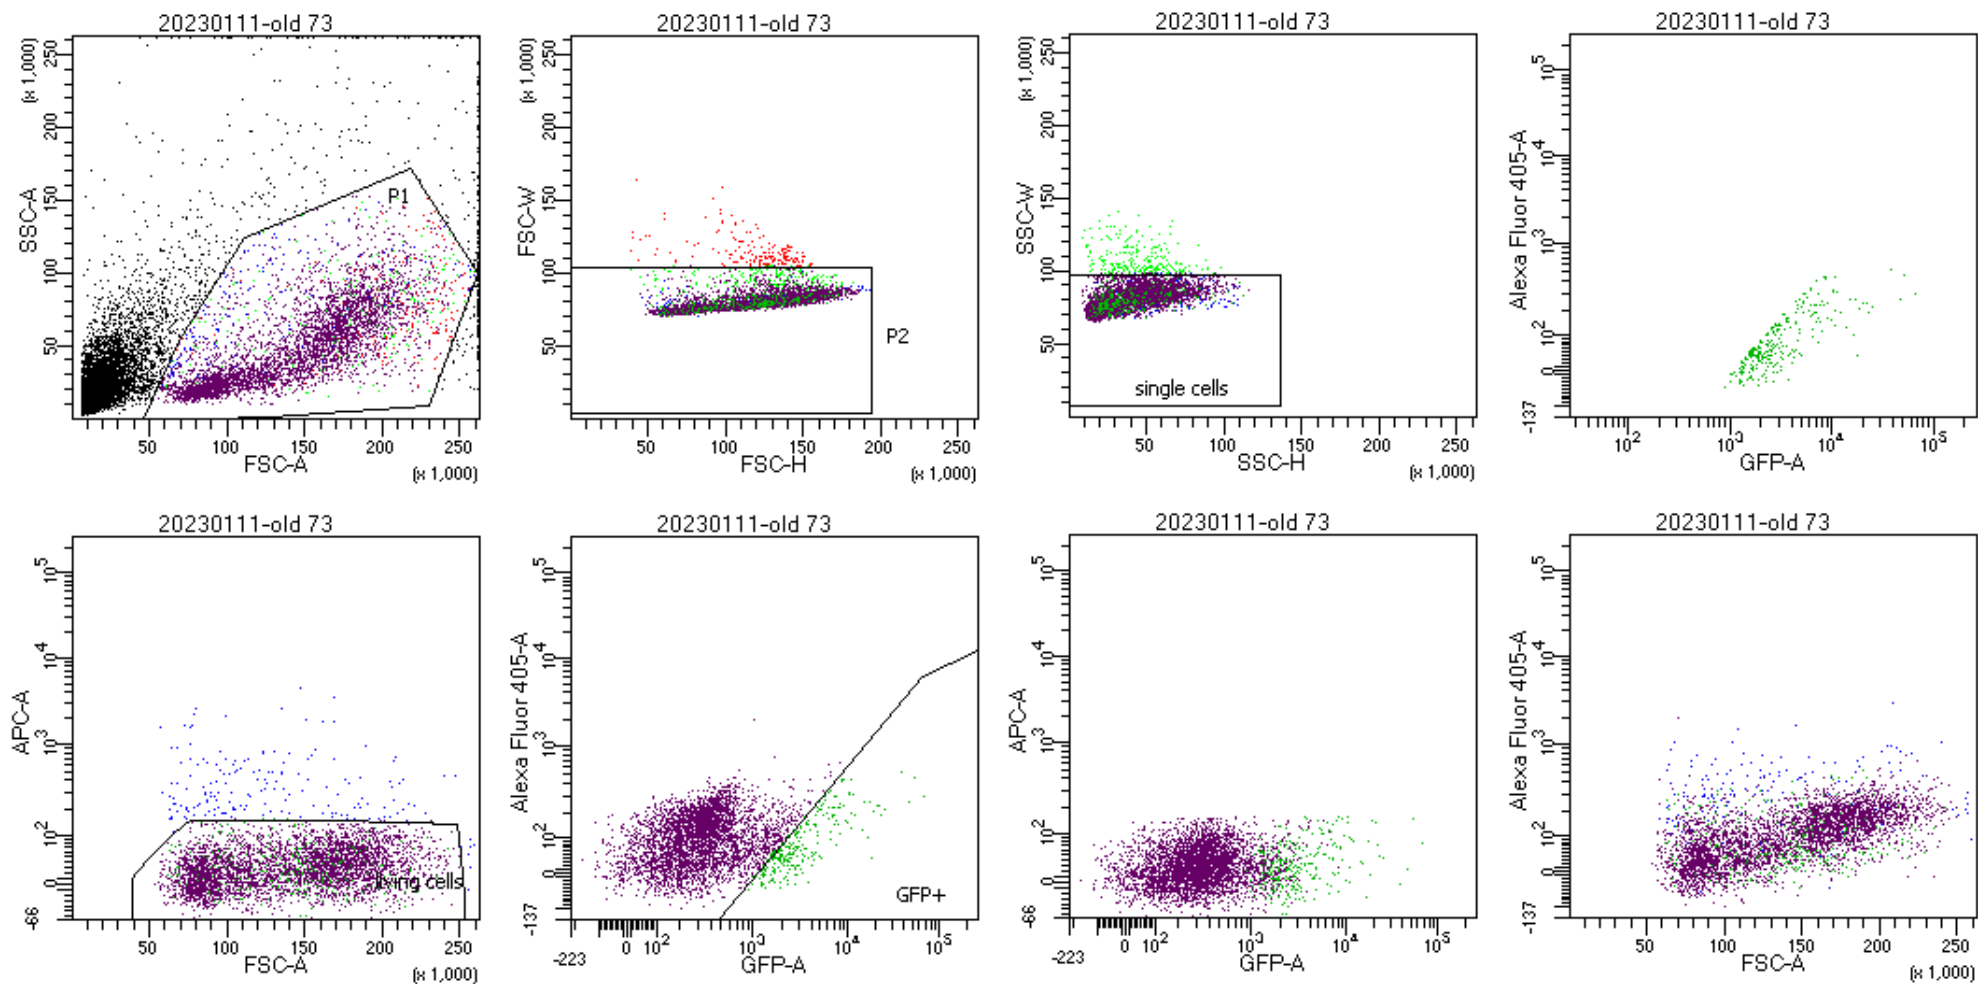

Tube: old 73

| Population   | #Events | %Parent | %Total |
|--------------|---------|---------|--------|
| All Events   | 11,336  | ####    | 100.0  |
| P1           | 4,540   | 40.0    | 40.0   |
| P2           | 4,365   | 96.1    | 38.5   |
| single cells | 4,123   | 94.5    | 36.4   |
| living cells | 3,950   | 95.8    | 34.8   |
| GFP+         | 266     | 6.7     | 2.3    |



# BD FACSDiva 9.0.1

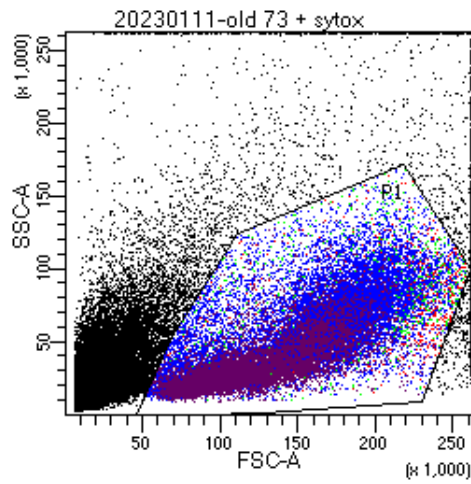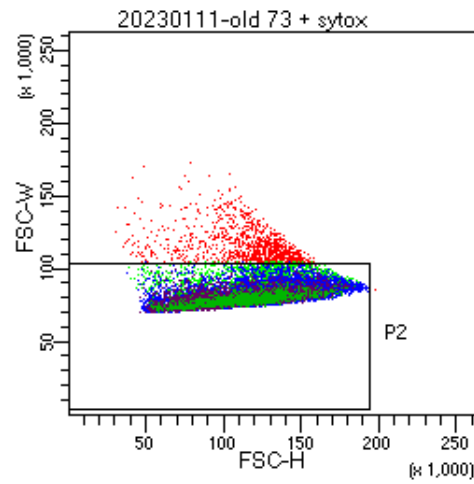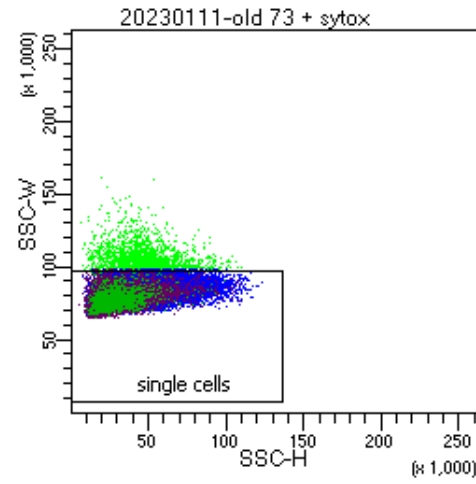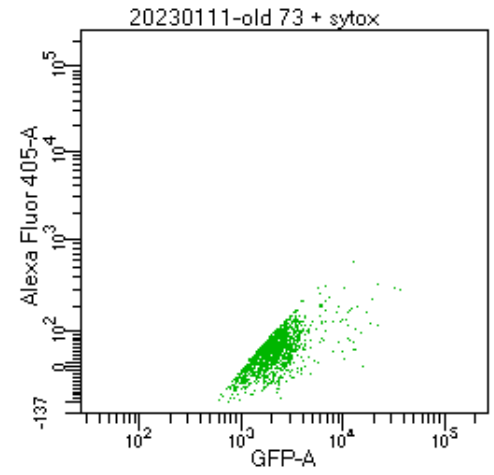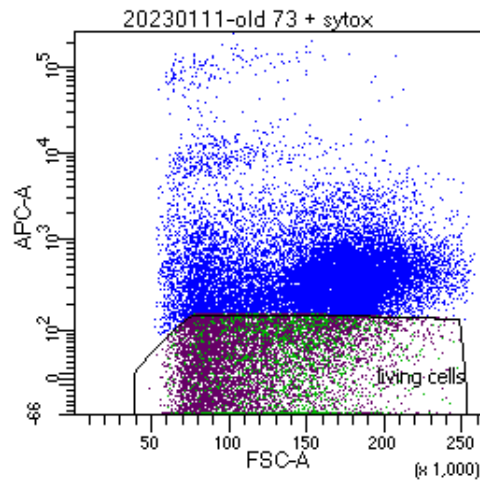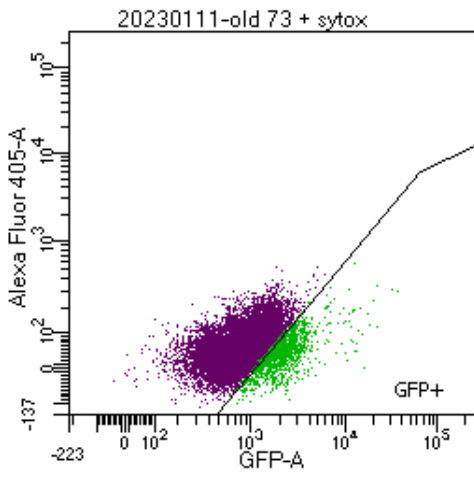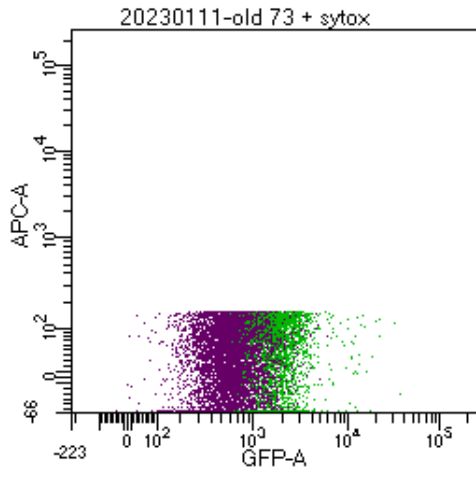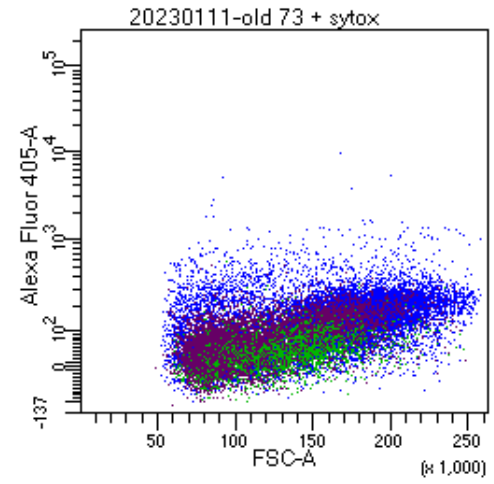

Tube: old 73 + sytox

| Population   | #Events | %Parent | %Total |
|--------------|---------|---------|--------|
| All Events   | 69,285  | ####    | 100.0  |
| P1           | 28,843  | 41.6    | 41.6   |
| P2           | 27,808  | 96.4    | 40.1   |
| single cells | 26,109  | 93.9    | 37.7   |
| living cells | 9,975   | 38.2    | 14.4   |
| GFP+         | 1,438   | 14.4    | 2.1    |

## BD FACSDiva 9.0.1

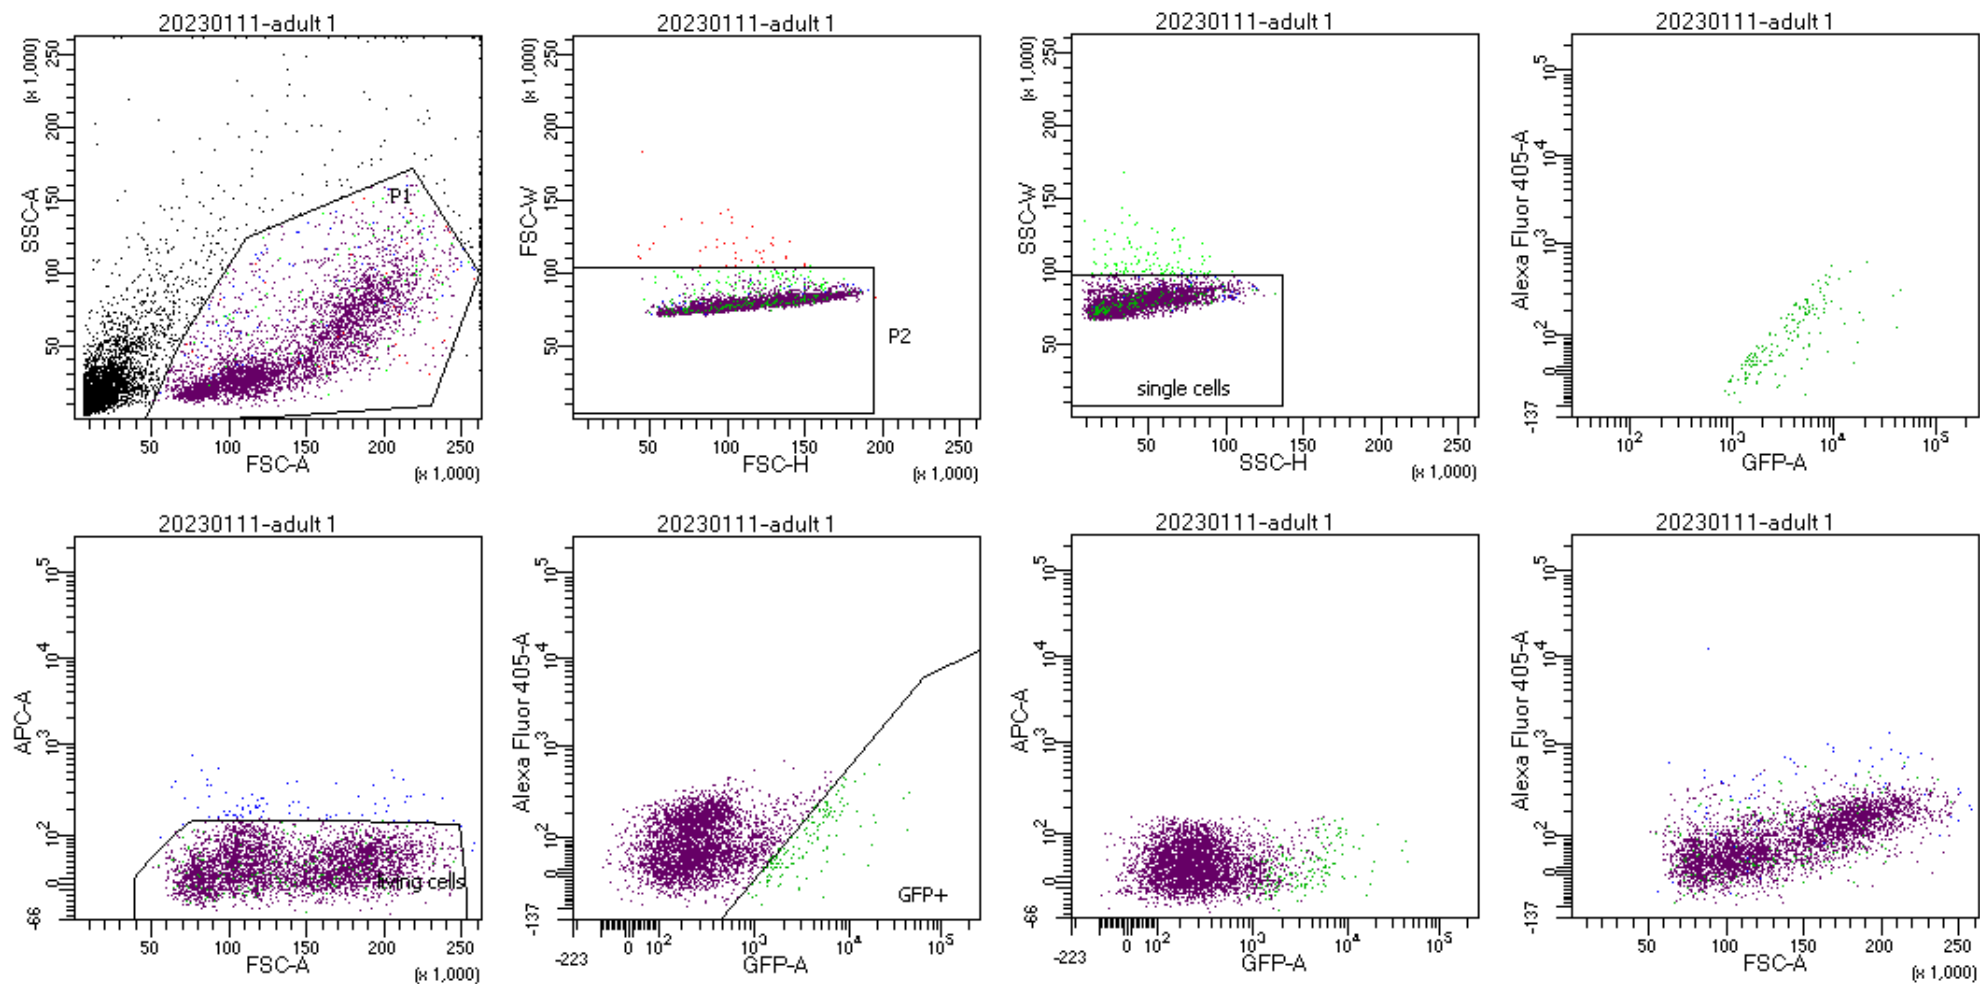

| Tube: adult 1 |         |         |        |
|---------------|---------|---------|--------|
| Population    | #Events | %Parent | %Total |
| All Events    | 8,320   | ####    | 100.0  |
| P1            | 4,274   | 51.4    | 51.4   |
| P2            | 4,231   | 99.0    | 50.9   |
| single cells  | 4,127   | 97.5    | 49.6   |
| living cells  | 4,041   | 97.9    | 48.6   |
| GFP+          | 151     | 3.7     | 1.8    |

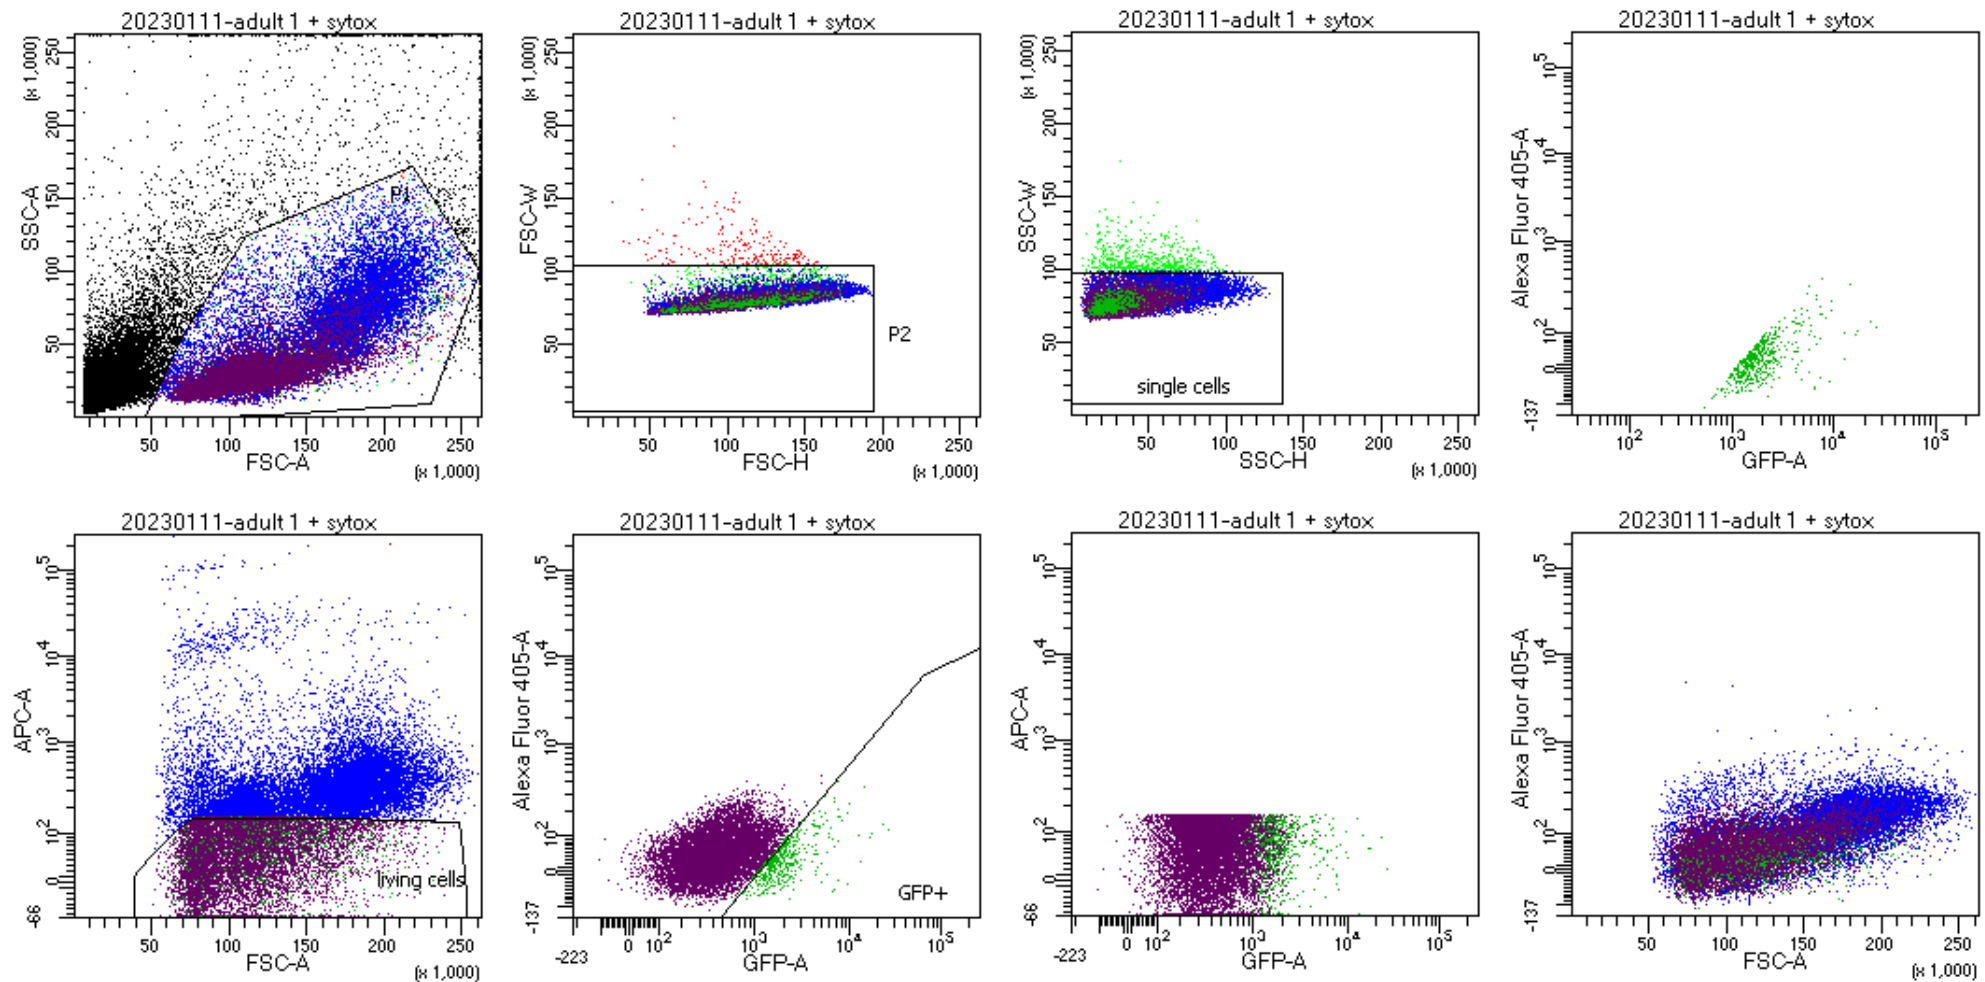

Tube: adult 1 + sytox

| Population   | #Events | %Parent | %Total |
|--------------|---------|---------|--------|
| All Events   | 48,620  | ####    | 100.0  |
| P1           | 24,154  | 49.7    | 49.7   |
| P2           | 23,949  | 99.2    | 49.3   |
| single cells | 23,400  | 97.7    | 48.1   |
| living cells | 10,012  | 42.8    | 20.6   |
| GFP+         | 498     | 5.0     | 1.0    |

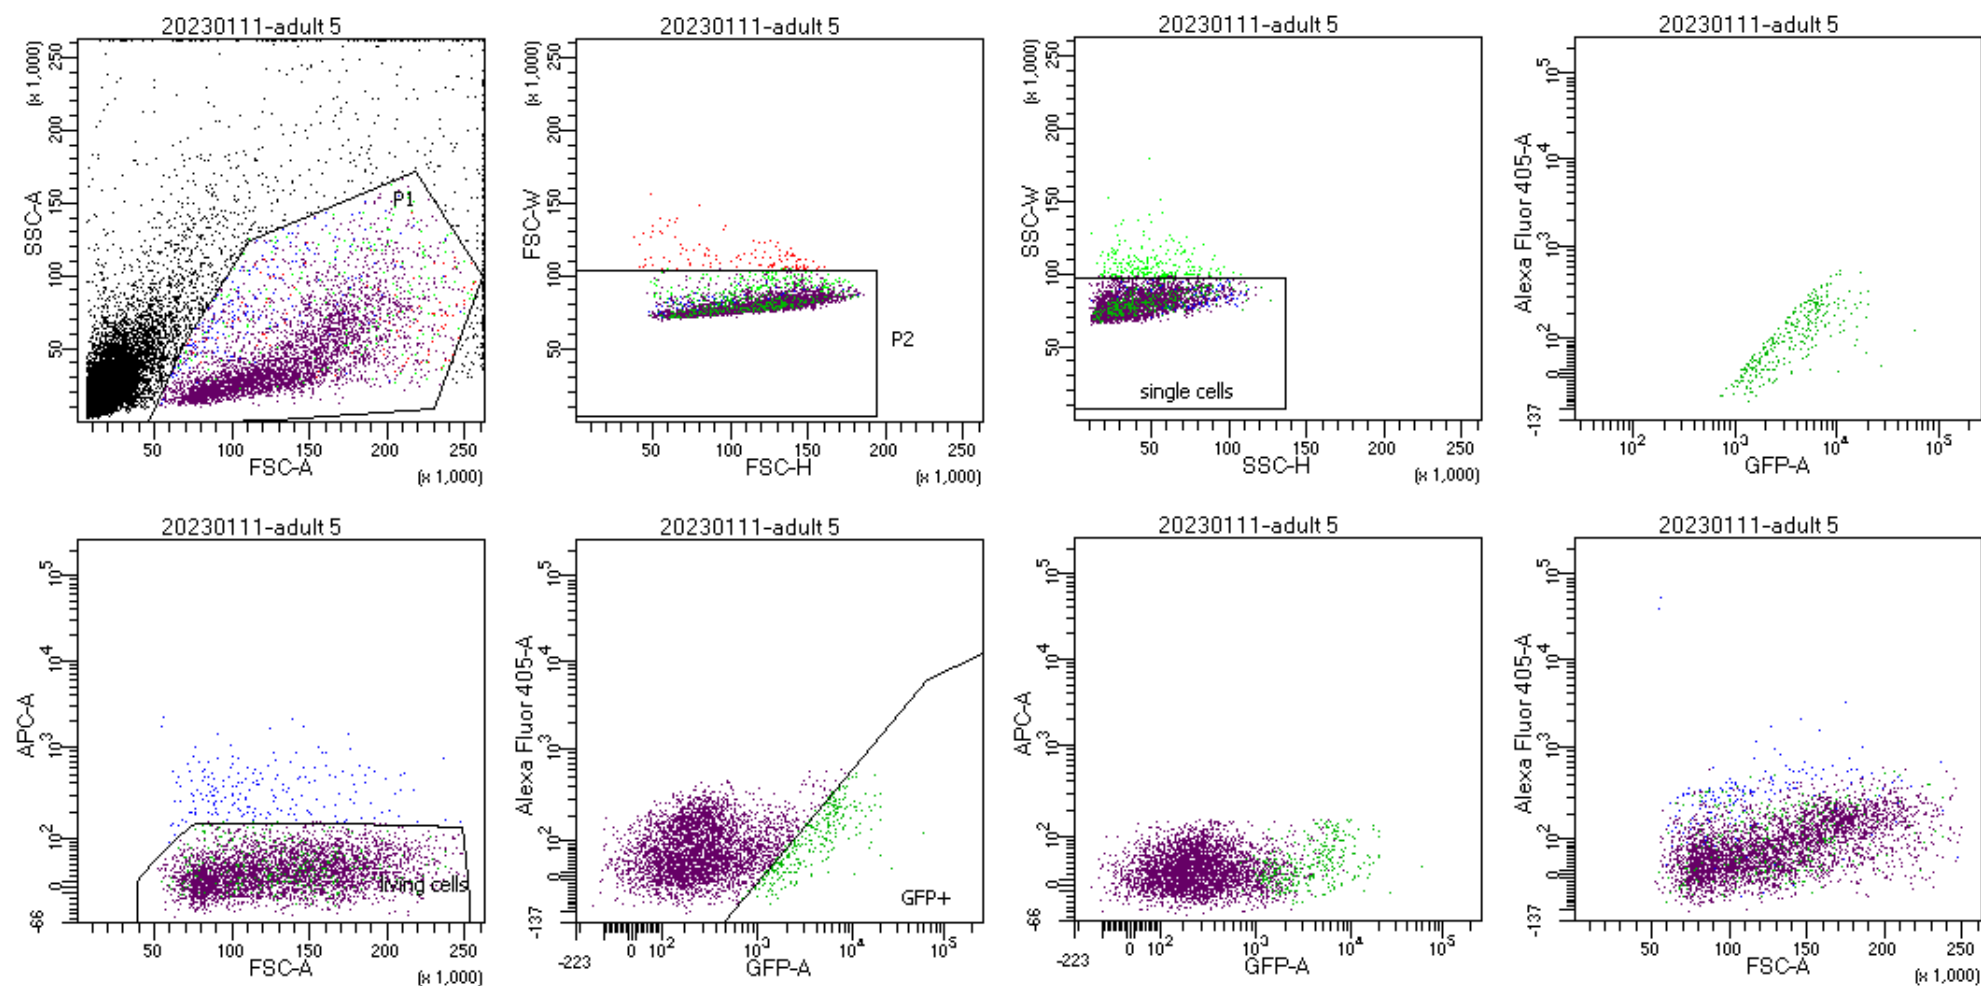

Tube: adult 5

| Population   | #Events | %Parent | %Total |
|--------------|---------|---------|--------|
| All Events   | 15,548  | ####    | 100.0  |
| P1           | 4,490   | 28.9    | 28.9   |
| P2           | 4,374   | 97.4    | 28.1   |
| single cells | 4,145   | 94.8    | 26.7   |
| living cells | 3,943   | 95.1    | 25.4   |
| GFP+         | 298     | 7.6     | 1.9    |

## BD FACSDiva 9.0.1

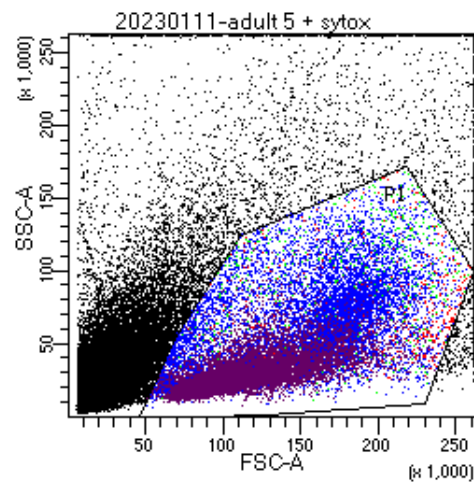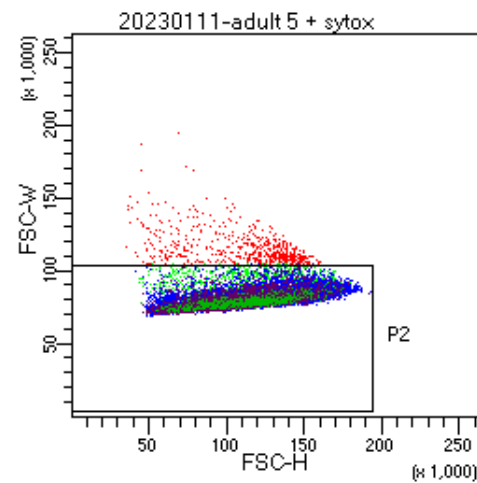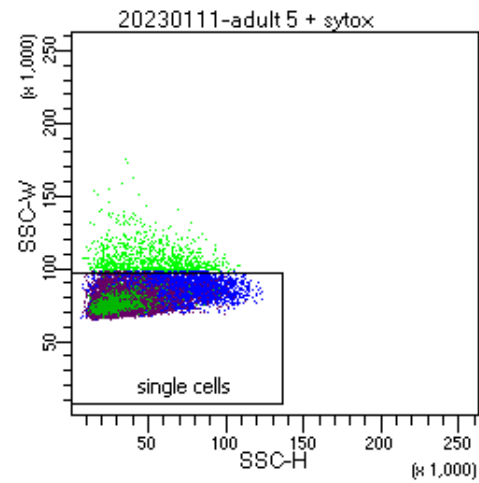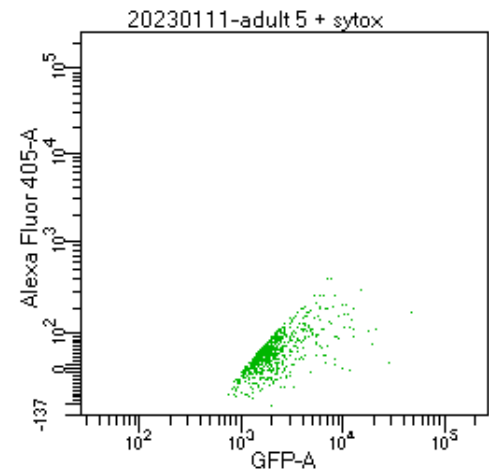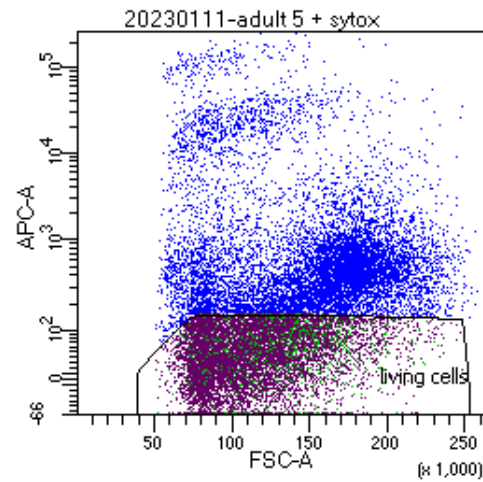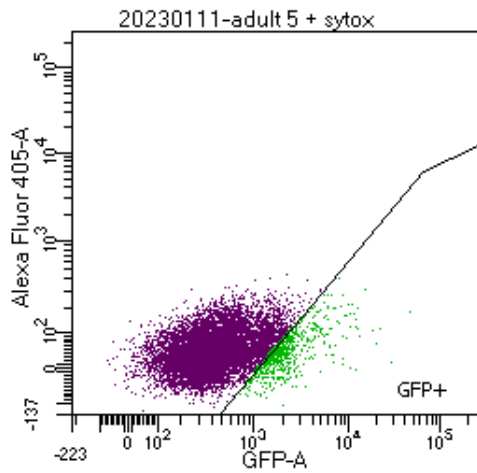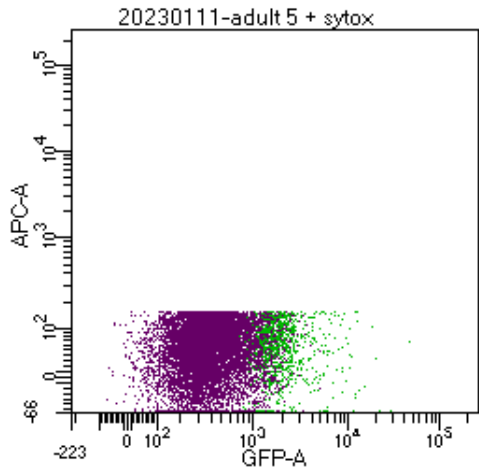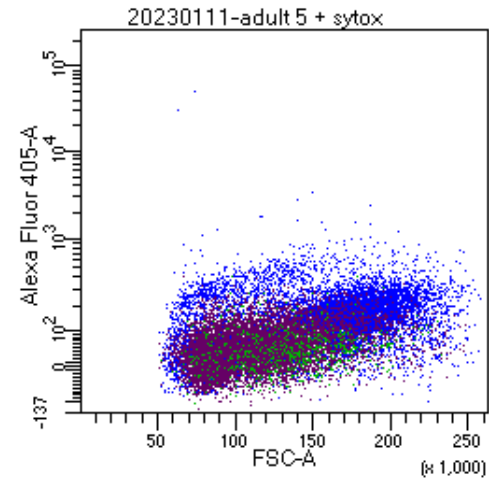

Tube: adult 5 + sytox

| Population   | #Events | %Parent | %Total |
|--------------|---------|---------|--------|
| All Events   | 74,856  | ####    | 100.0  |
| P1           | 21,069  | 28.1    | 28.1   |
| P2           | 20,514  | 97.4    | 27.4   |
| single cells | 19,550  | 95.3    | 26.1   |
| living cells | 9,988   | 51.1    | 13.3   |
| GFP+         | 695     | 7.0     | 0.9    |



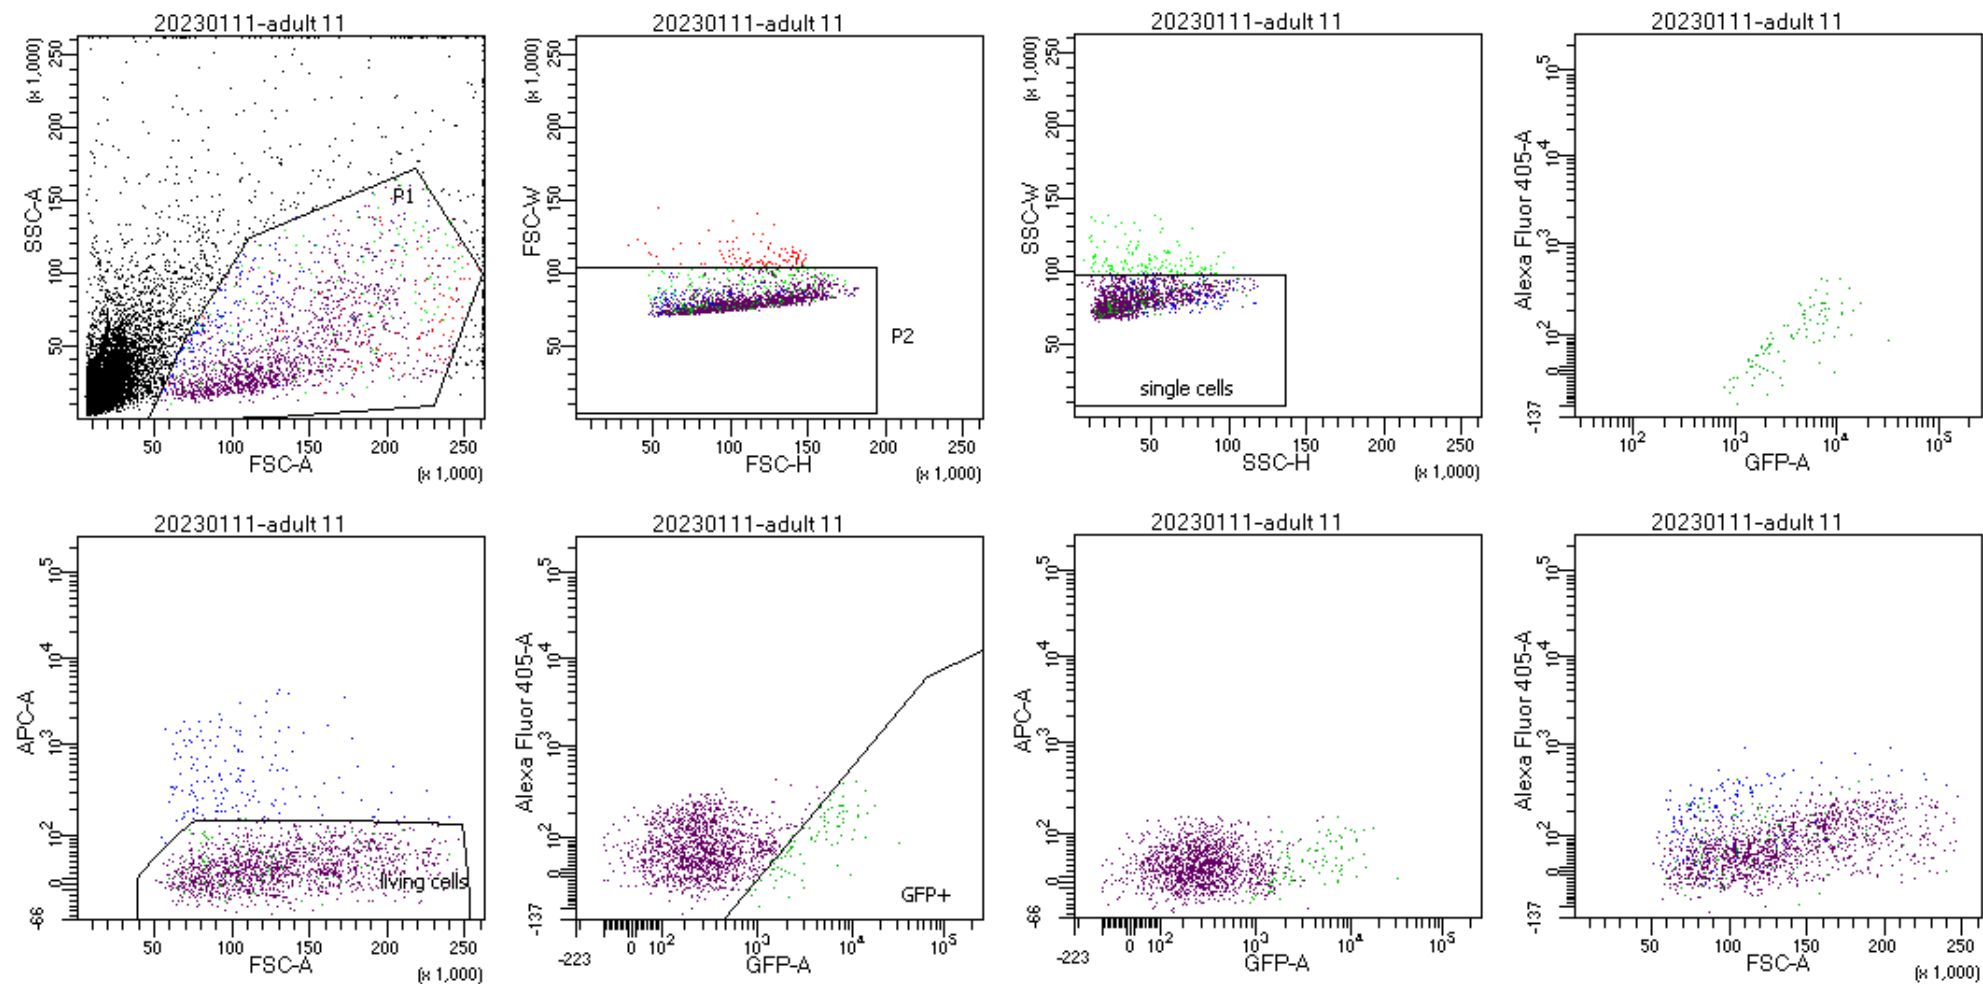

Tube: adult 11

| Population   | #Events | %Parent | %Total |
|--------------|---------|---------|--------|
| All Events   | 10,993  | ####    | 100.0  |
| P1           | 1,827   | 16.6    | 16.6   |
| P2           | 1,722   | 94.3    | 15.7   |
| single cells | 1,588   | 92.2    | 14.4   |
| living cells | 1,427   | 89.9    | 13.0   |
| GFP+         | 93      | 6.5     | 0.8    |

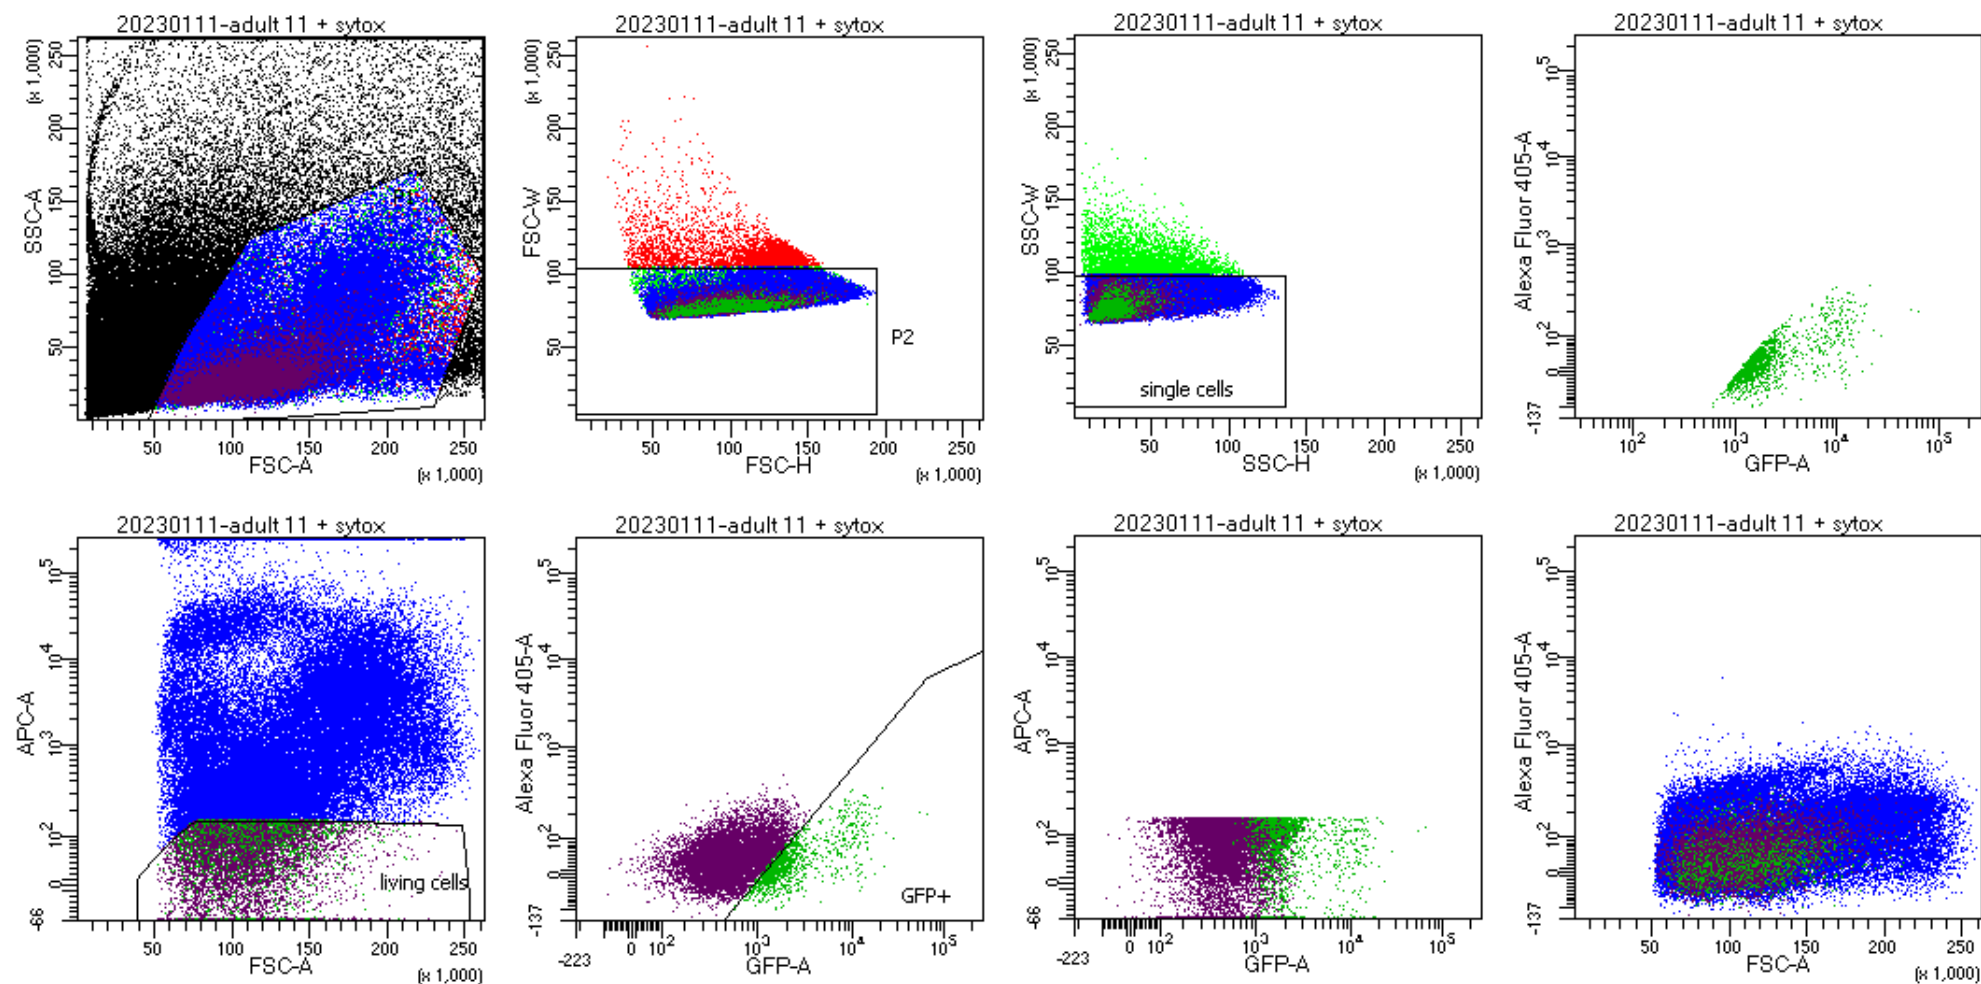

Tube: adult 11 + sytox

| Population   | #Events | %Parent | %Total |
|--------------|---------|---------|--------|
| All Events   | 403,516 | ####    | 100.0  |
| P1           | 70,179  | 17.4    | 17.4   |
| P2           | 66,625  | 94.9    | 16.5   |
| single cells | 62,108  | 93.2    | 15.4   |
| living cells | 9,580   | 15.4    | 2.4    |
| GFP+         | 1,143   | 11.9    | 0.3    |

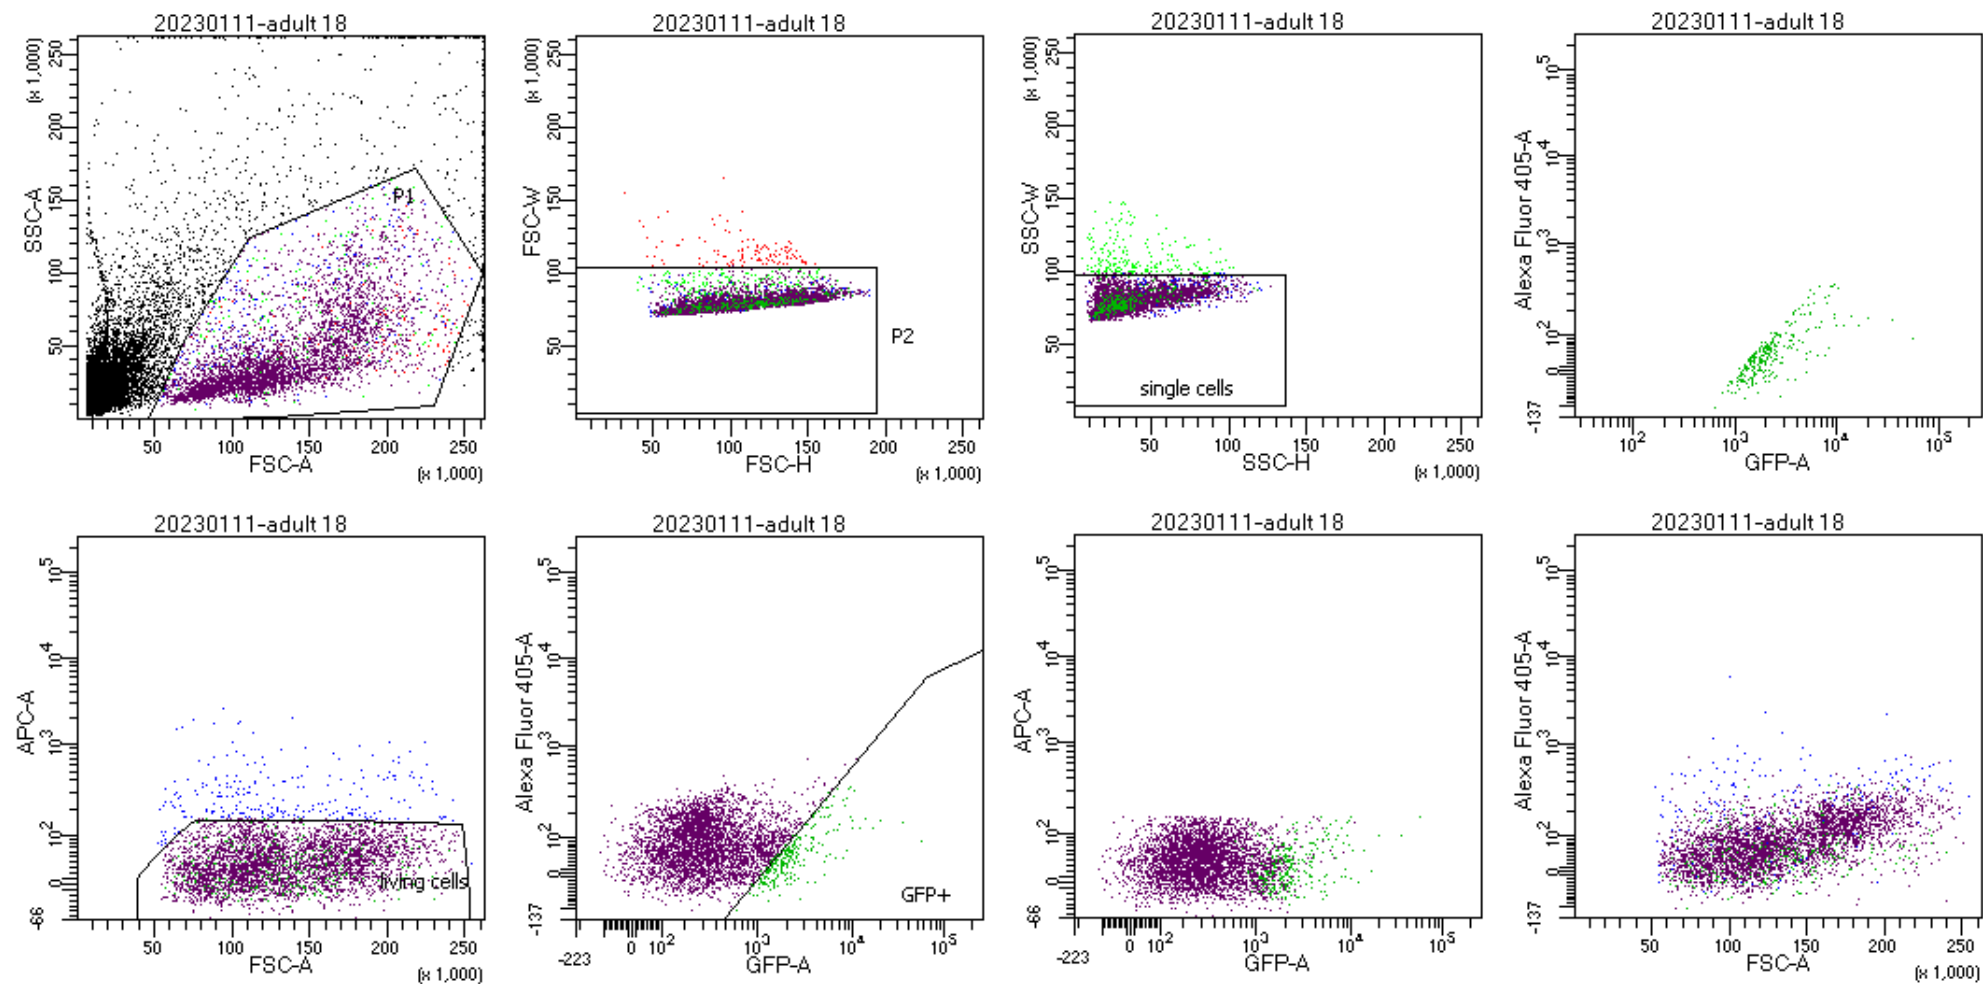

Tube: adult 18

| Population   | #Events | %Parent | %Total |
|--------------|---------|---------|--------|
| All Events   | 14,248  | ####    | 100.0  |
| P1           | 4,411   | 31.0    | 31.0   |
| P2           | 4,294   | 97.3    | 30.1   |
| single cells | 4,083   | 95.1    | 28.7   |
| living cells | 3,850   | 94.3    | 27.0   |
| GFP+         | 263     | 6.8     | 1.8    |

## BD FACSDiva 9.0.1

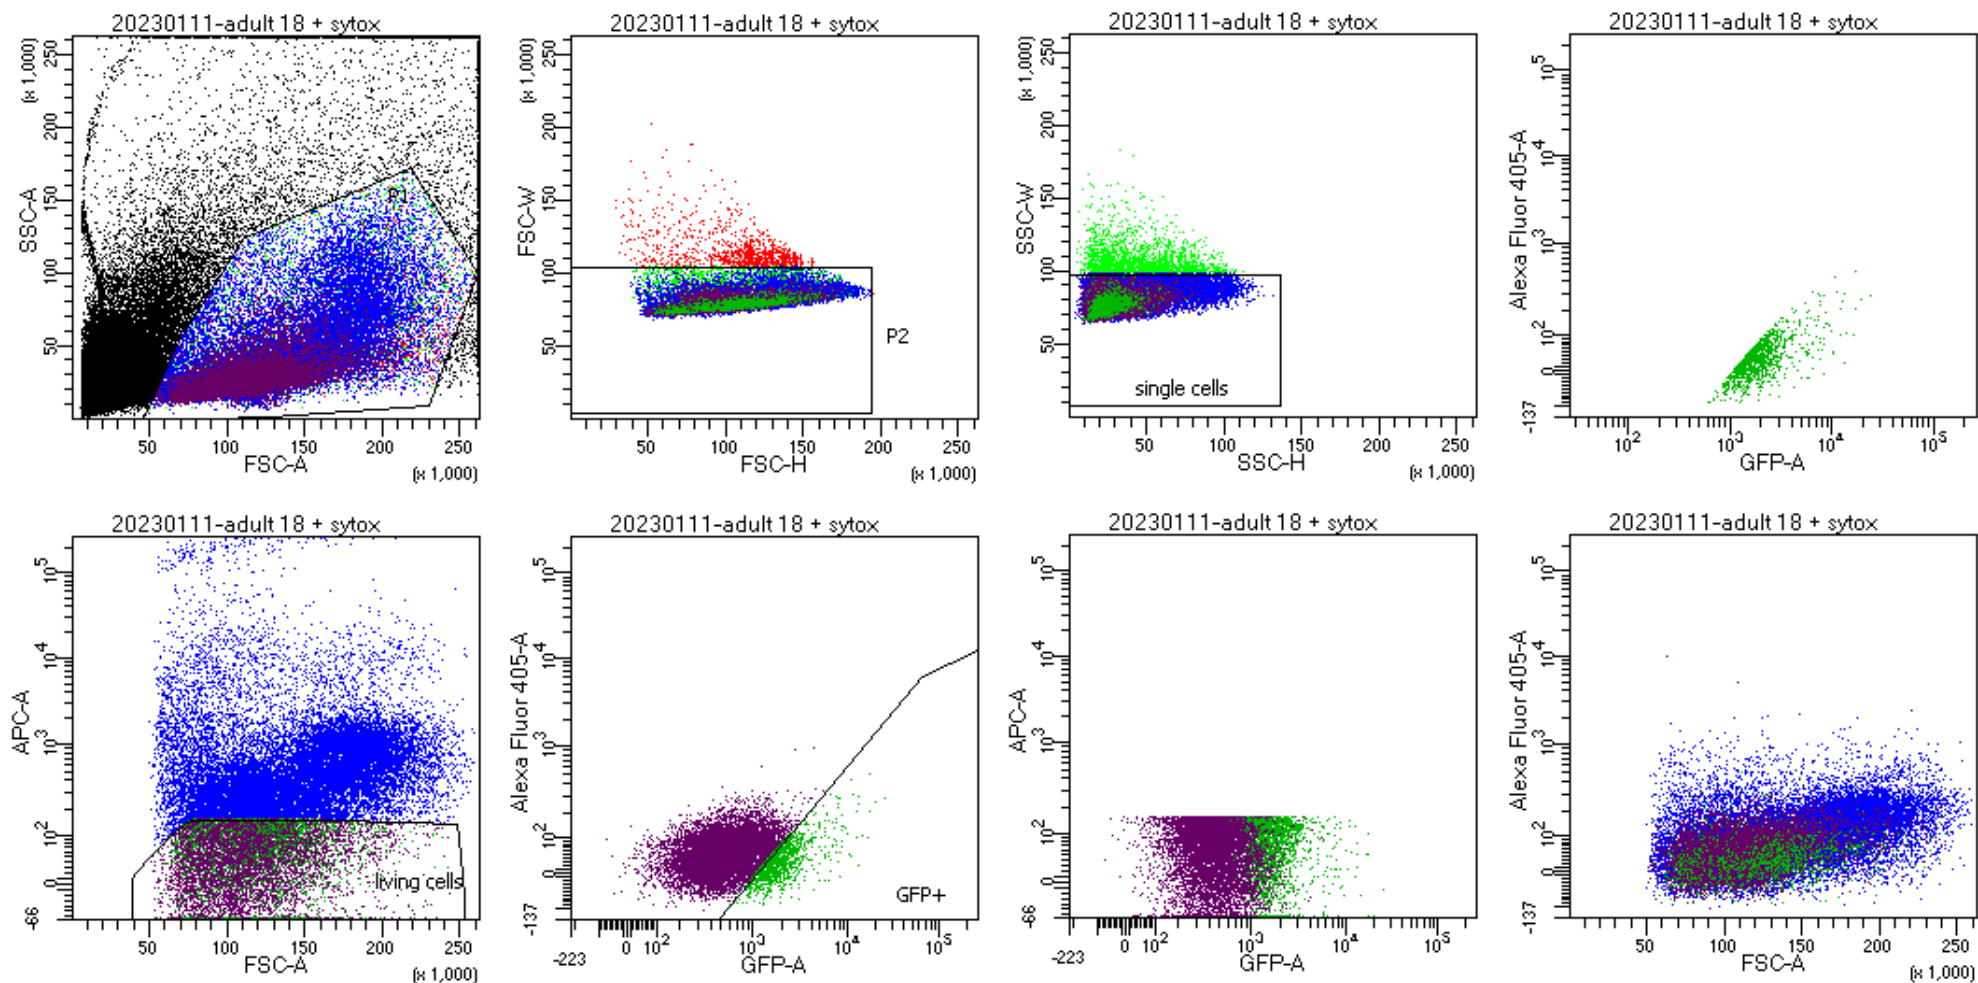

Tube: adult 18 + sytox

| Population   | #Events | %Parent | %Total |
|--------------|---------|---------|--------|
| All Events   | 104,853 | ####    | 100.0  |
| P1           | 32,989  | 31.5    | 31.5   |
| P2           | 32,025  | 97.1    | 30.5   |
| single cells | 30,076  | 93.9    | 28.7   |
| living cells | 10,000  | 33.2    | 9.5    |
| GFP+         | 1,144   | 11.4    | 1.1    |

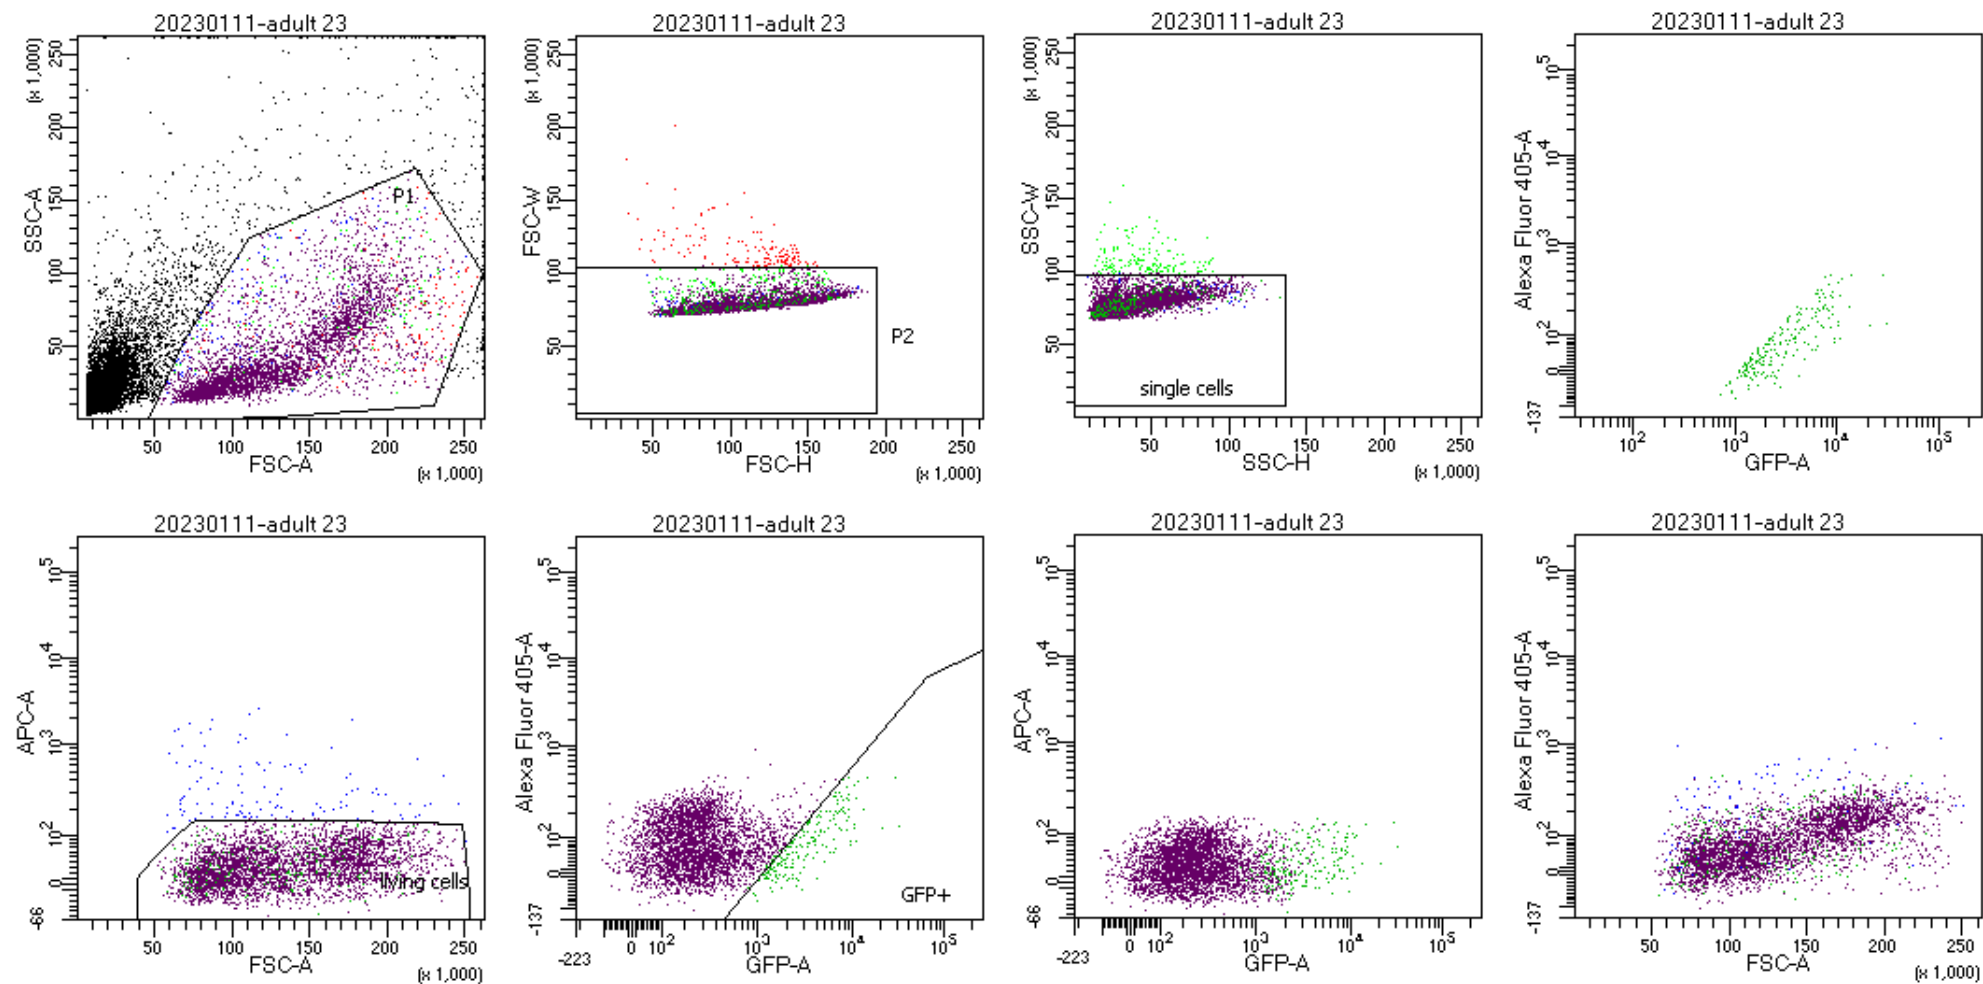

Tube: adult 23

| Population   | #Events | %Parent | %Total |
|--------------|---------|---------|--------|
| All Events   | 12,064  | ####    | 100.0  |
| P1           | 4,118   | 34.1    | 34.1   |
| P2           | 3,969   | 96.4    | 32.9   |
| single cells | 3,813   | 96.1    | 31.6   |
| living cells | 3,694   | 96.9    | 30.6   |
| GFP+         | 195     | 5.3     | 1.6    |



# BD FACSDiva 9.0.1

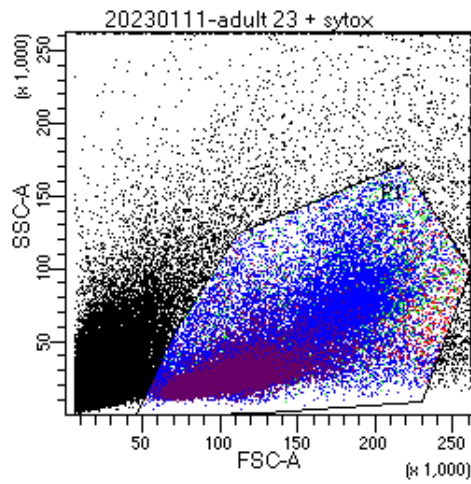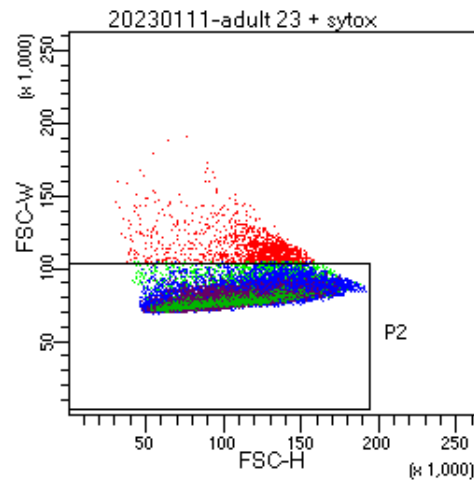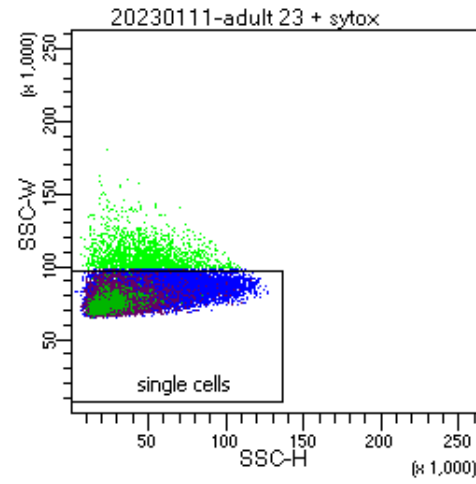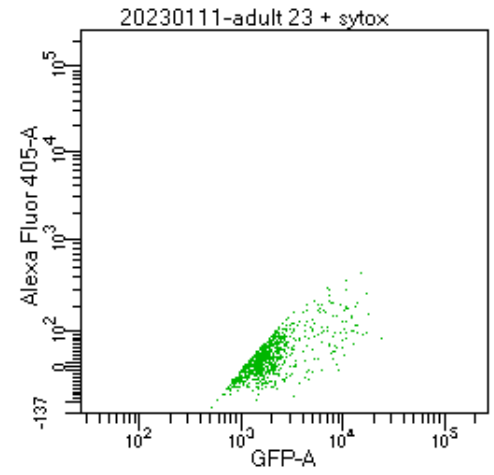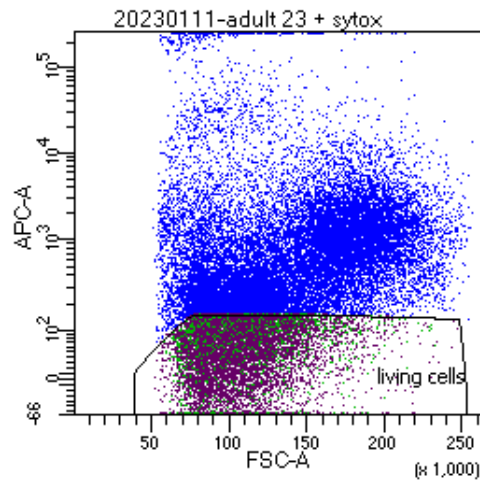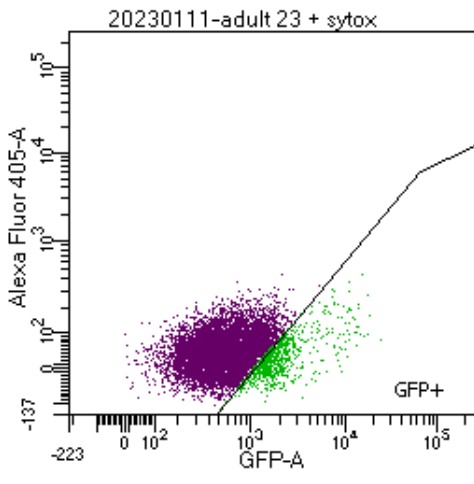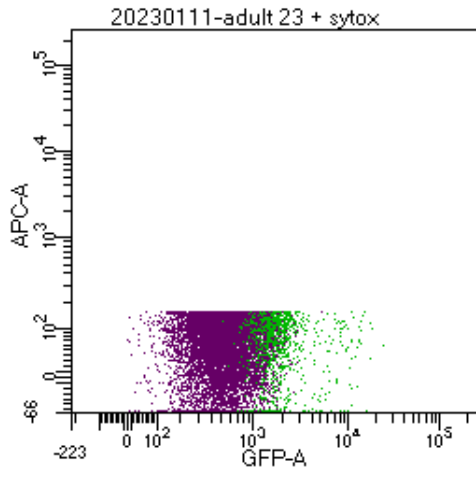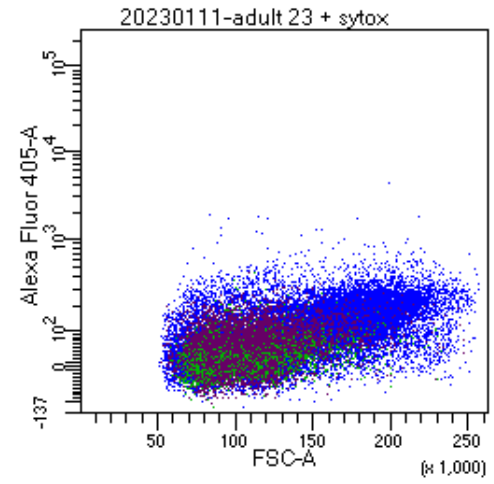

Tube: adult 23 + sytox

| Population   | #Events | %Parent | %Total |
|--------------|---------|---------|--------|
| All Events   | 106,760 | ####    | 100.0  |
| P1           | 33,713  | 31.6    | 31.6   |
| P2           | 32,502  | 96.4    | 30.4   |
| single cells | 30,571  | 94.1    | 28.6   |
| living cells | 10,000  | 32.7    | 9.4    |
| GFP+         | 834     | 8.3     | 0.8    |

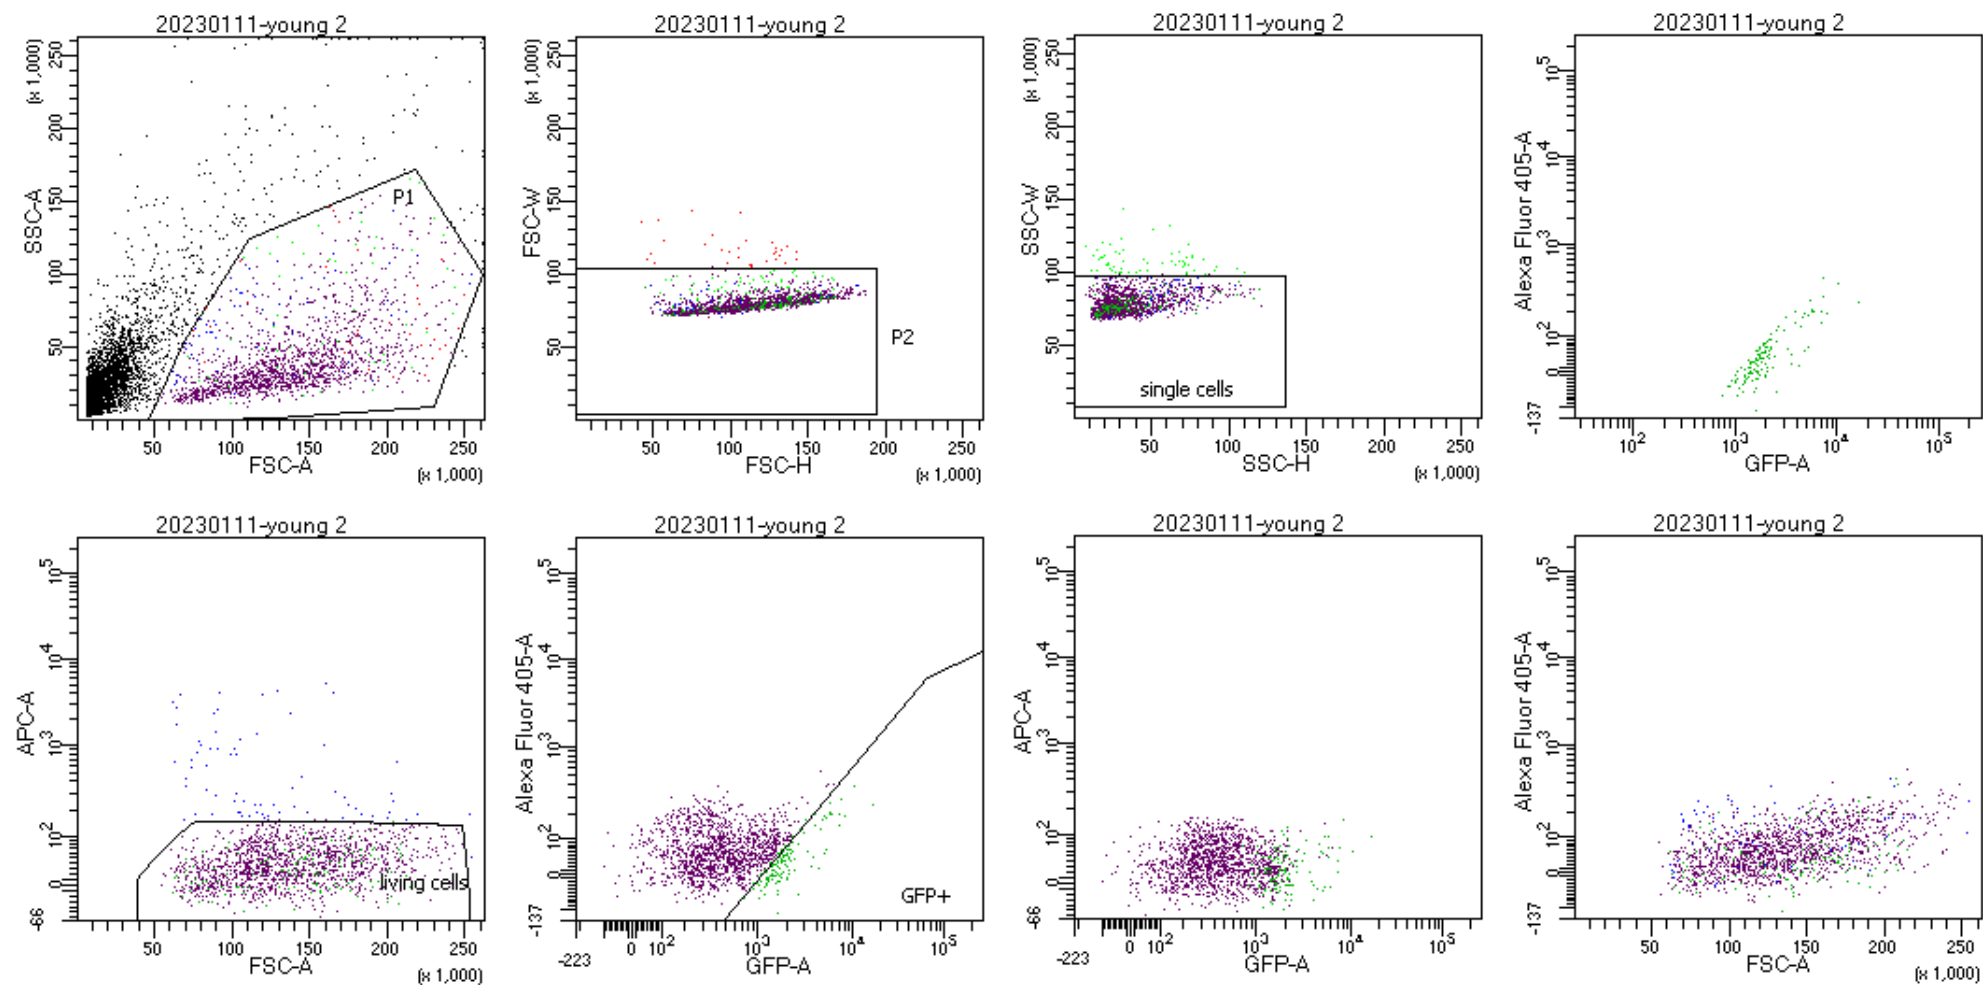

Tube: young 2

| Population   | #Events | %Parent | %Total |
|--------------|---------|---------|--------|
| All Events   | 5,158   | ####    | 100.0  |
| P1           | 1,578   | 30.6    | 30.6   |
| P2           | 1,545   | 97.9    | 30.0   |
| single cells | 1,485   | 96.1    | 28.8   |
| living cells | 1,415   | 95.3    | 27.4   |
| GFP+         | 126     | 8.9     | 2.4    |

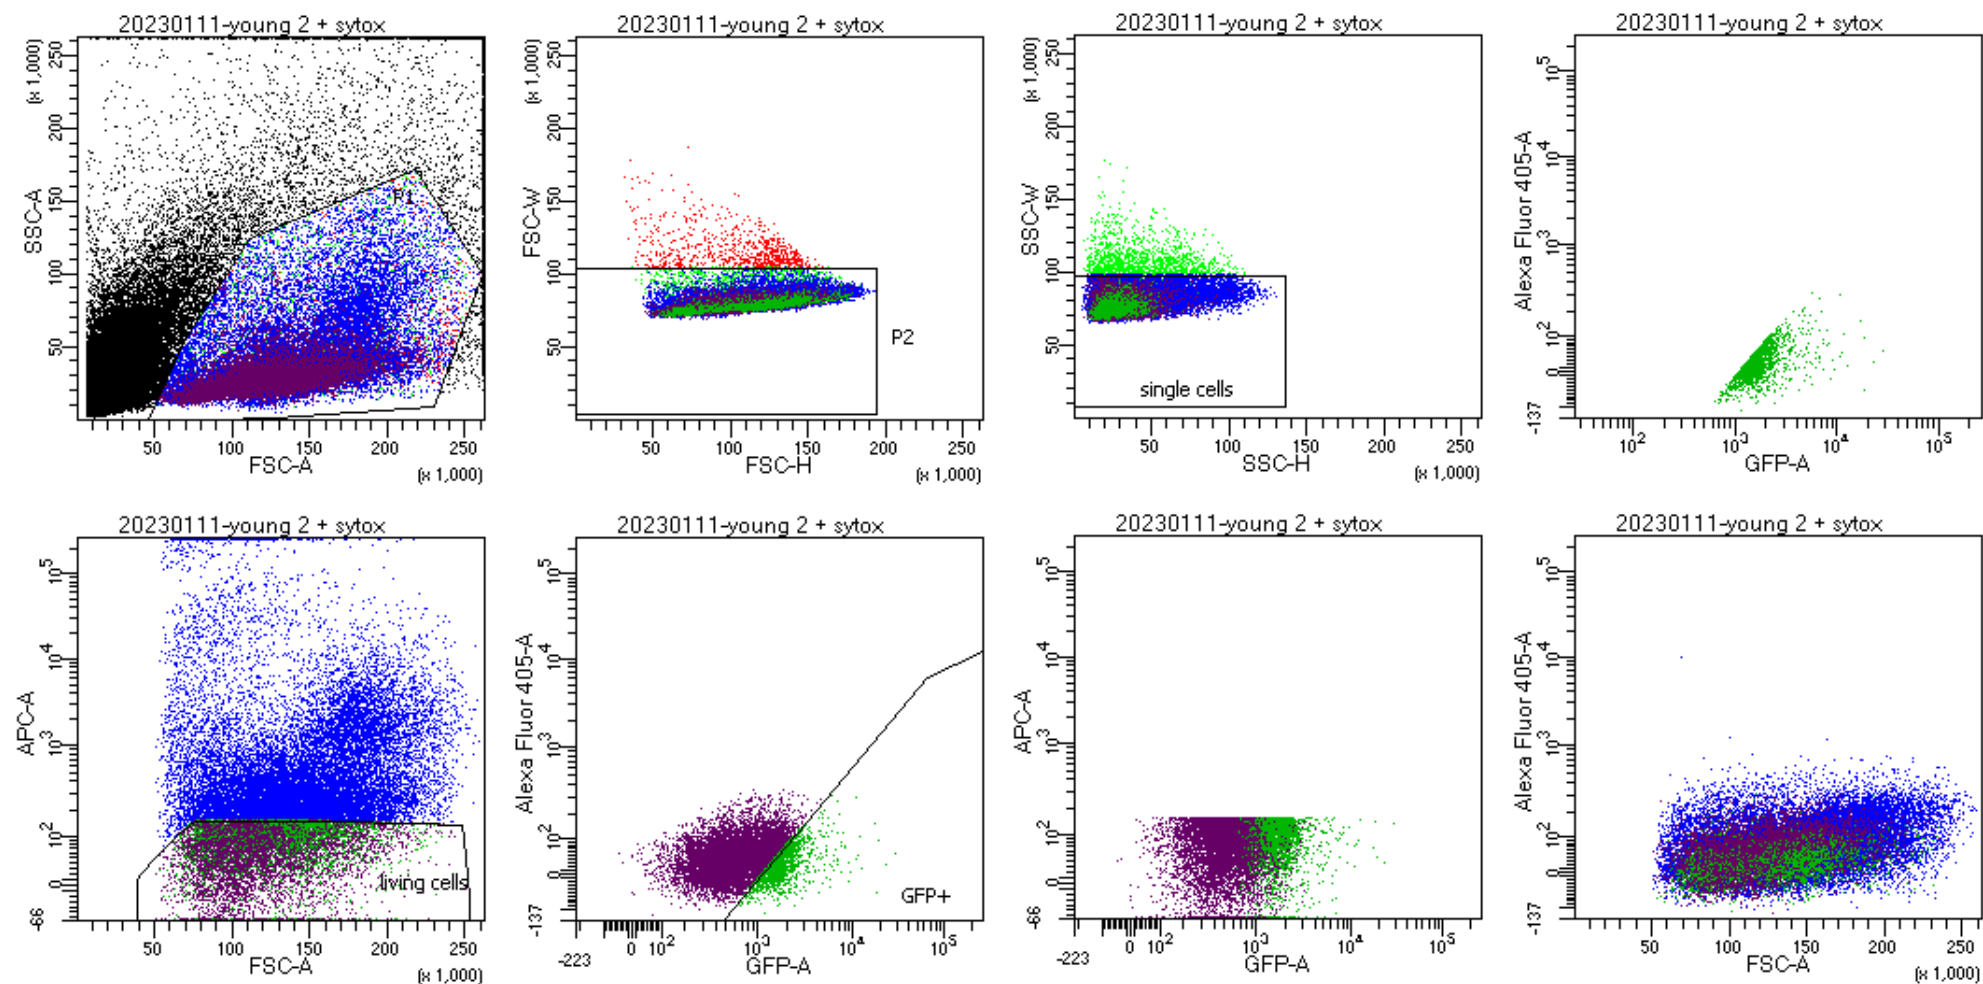

Tube: young 2 + sytox

| Population   | #Events | %Parent | %Total |
|--------------|---------|---------|--------|
| All Events   | 107,451 | ####    | 100.0  |
| P1           | 30,878  | 28.7    | 28.7   |
| P2           | 30,152  | 97.6    | 28.1   |
| single cells | 28,817  | 95.6    | 26.8   |
| living cells | 10,000  | 34.7    | 9.3    |
| GFP+         | 1,343   | 13.4    | 1.2    |

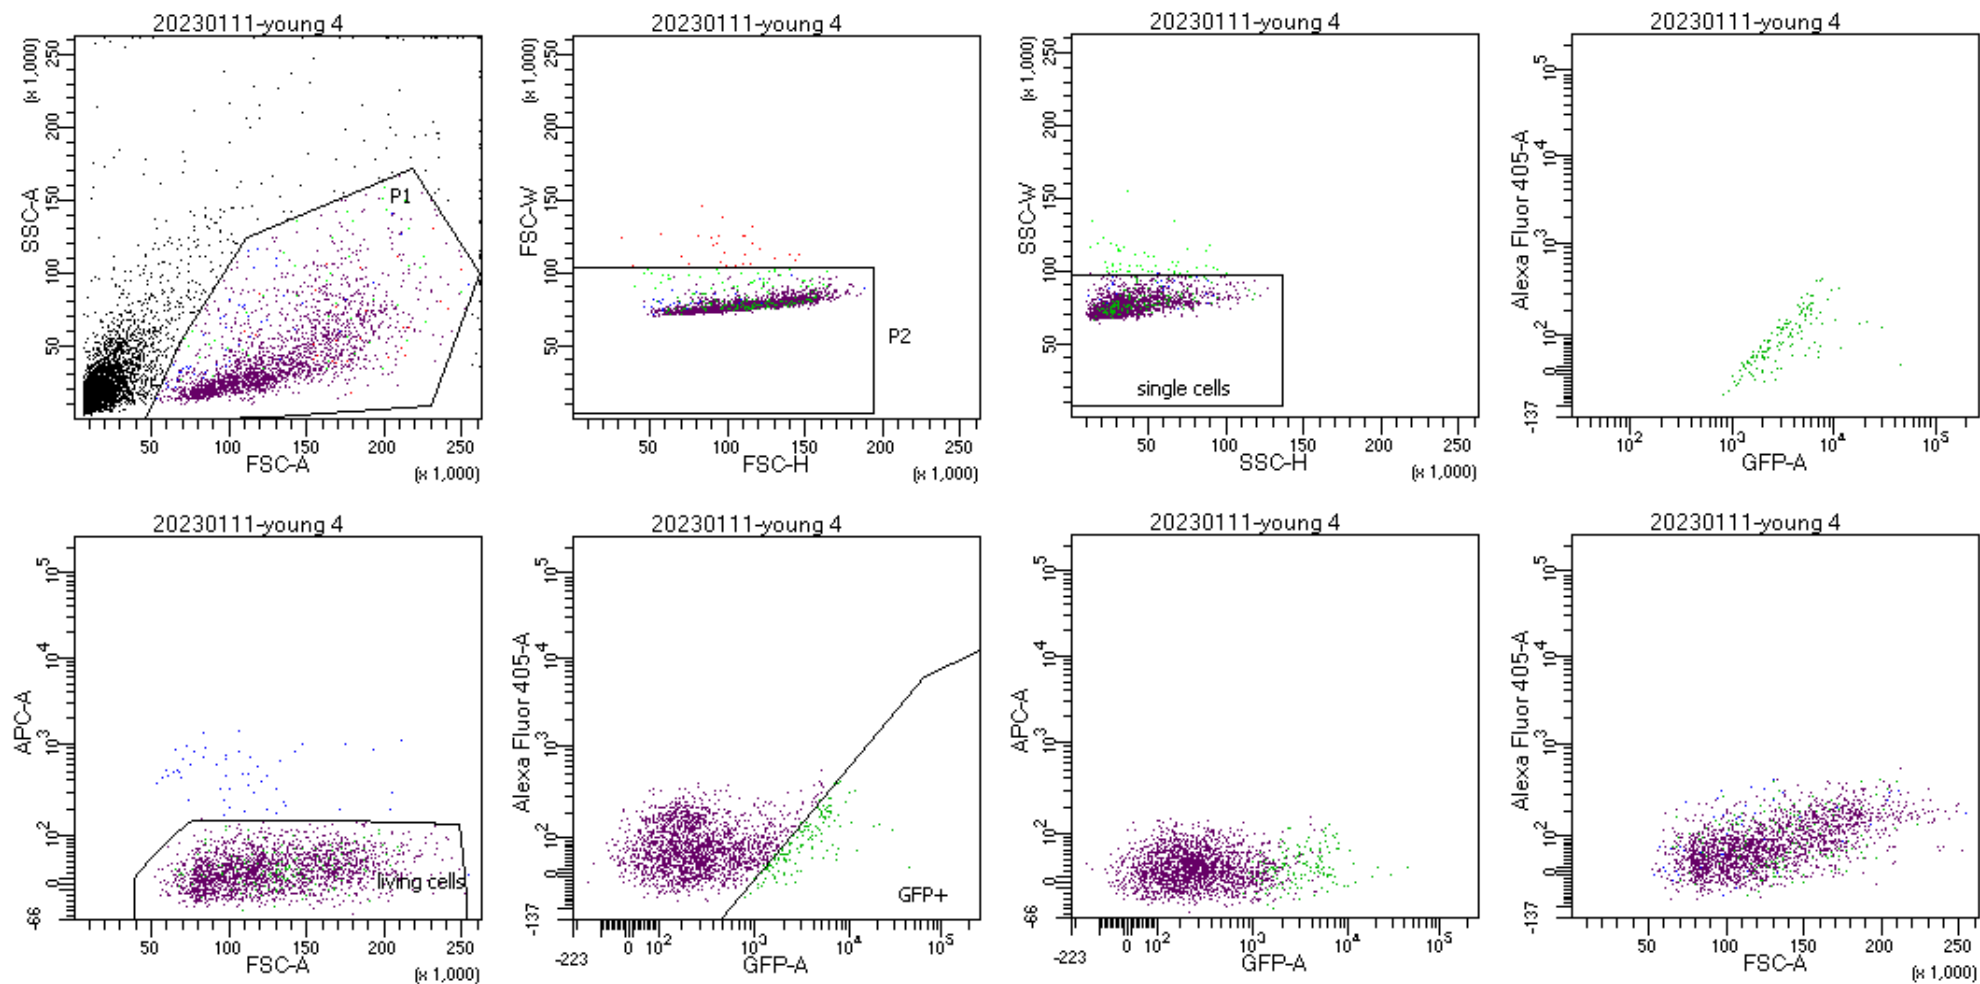

Tube: young 4

| Population   | #Events | %Parent | %Total |
|--------------|---------|---------|--------|
| All Events   | 5,980   | ####    | 100.0  |
| P1           | 2,256   | 37.7    | 37.7   |
| P2           | 2,227   | 98.7    | 37.2   |
| single cells | 2,176   | 97.7    | 36.4   |
| living cells | 2,124   | 97.6    | 35.5   |
| GFP+         | 142     | 6.7     | 2.4    |

# BD FACSDiva 9.0.1

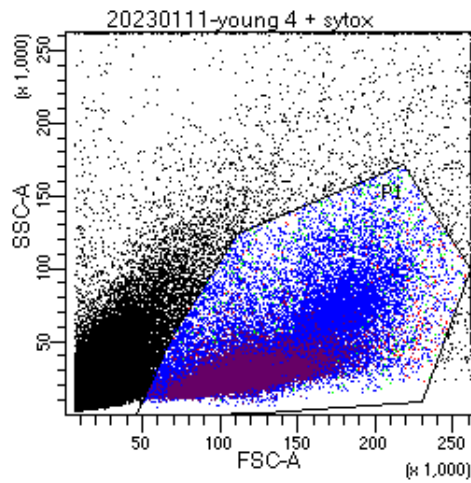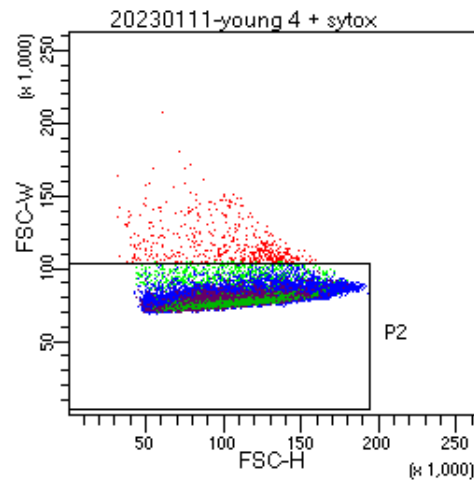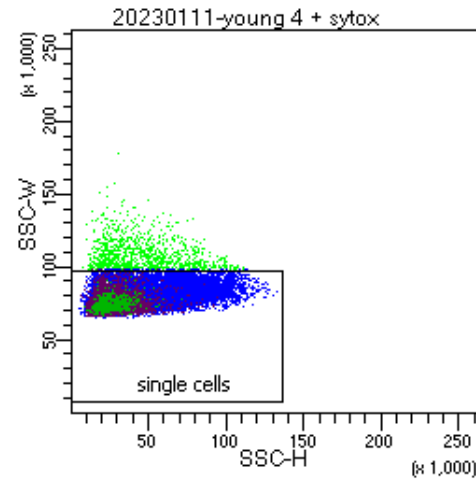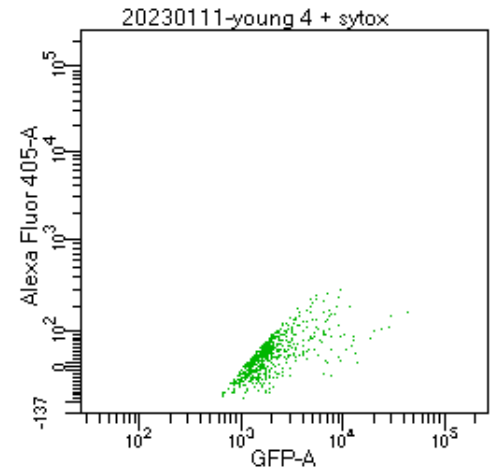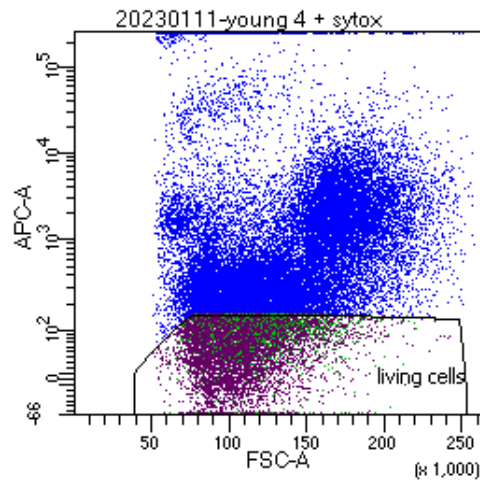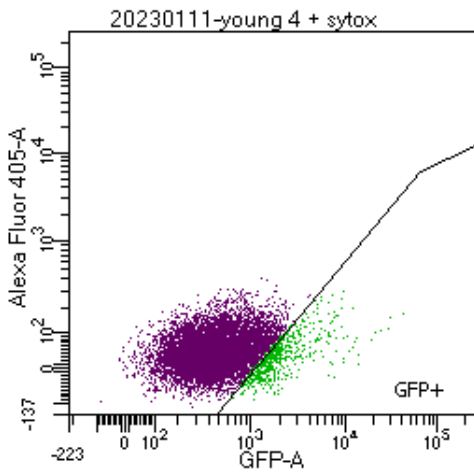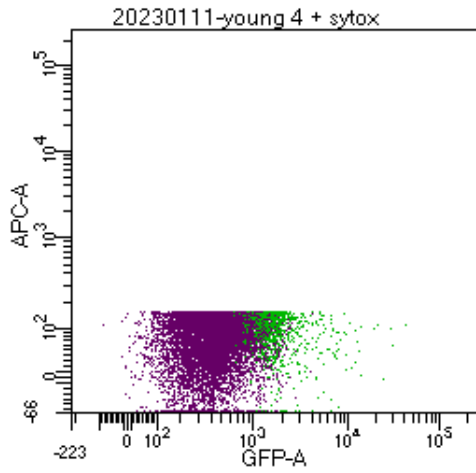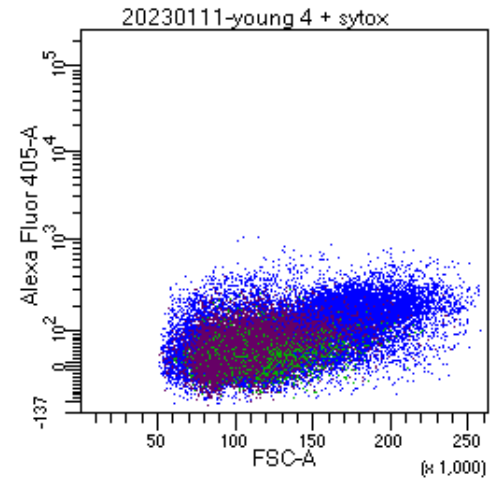

Tube: young 4 + sytox

| Population   | #Events | %Parent | %Total |
|--------------|---------|---------|--------|
| All Events   | 101,628 | ####    | 100.0  |
| P1           | 36,706  | 36.1    | 36.1   |
| P2           | 36,230  | 98.7    | 35.6   |
| single cells | 35,211  | 97.2    | 34.6   |
| living cells | 10,000  | 28.4    | 9.8    |
| GFP+         | 632     | 6.3     | 0.6    |



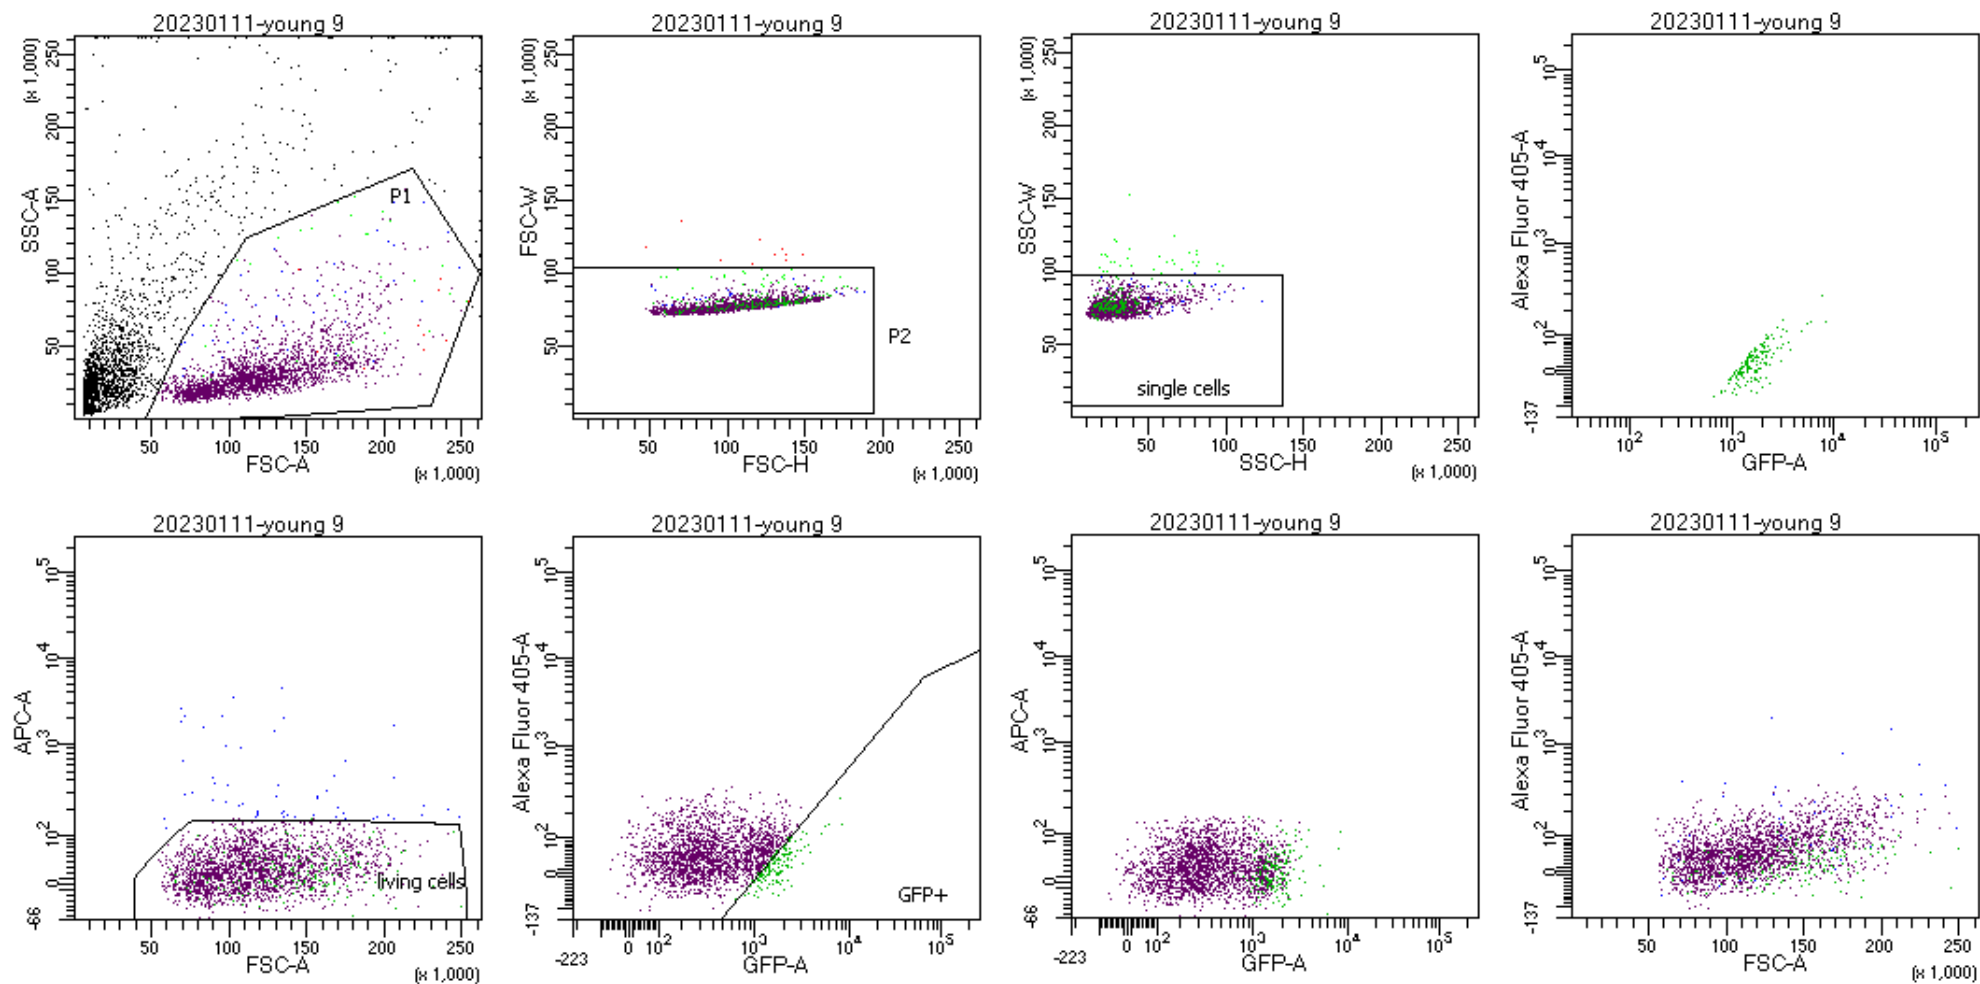

Tube: young 9

| Population   | #Events | %Parent | %Total |
|--------------|---------|---------|--------|
| All Events   | 4,137   | ####    | 100.0  |
| P1           | 2,241   | 54.2    | 54.2   |
| P2           | 2,230   | 99.5    | 53.9   |
| single cells | 2,198   | 98.6    | 53.1   |
| living cells | 2,144   | 97.5    | 51.8   |
| GFP+         | 160     | 7.5     | 3.9    |

## BD FACSDiva 9.0.1

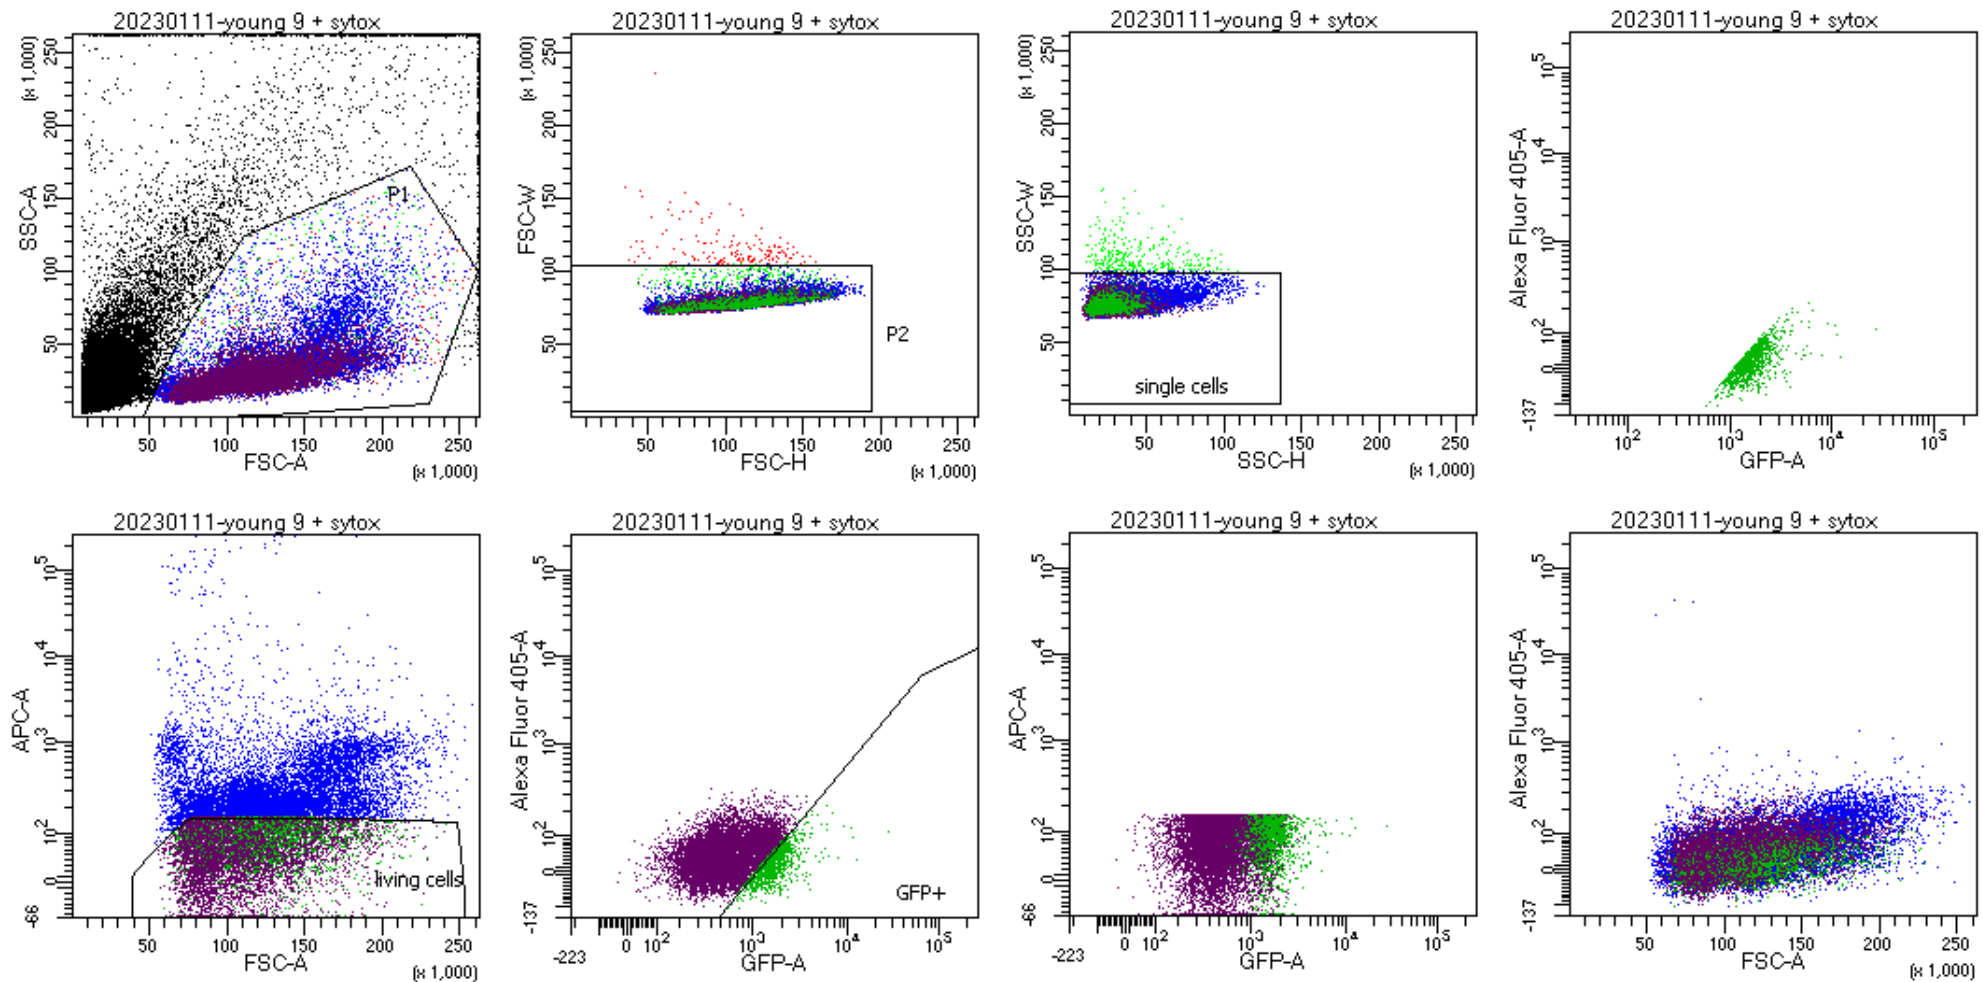

Tube: young 9 + sytox

| Population   | #Events | %Parent | %Total |
|--------------|---------|---------|--------|
| All Events   | 36,295  | ####    | 100.0  |
| P1           | 19,434  | 53.5    | 53.5   |
| P2           | 19,276  | 99.2    | 53.1   |
| single cells | 18,950  | 98.3    | 52.2   |
| living cells | 10,000  | 52.8    | 27.6   |
| GFP+         | 1,050   | 10.5    | 2.9    |

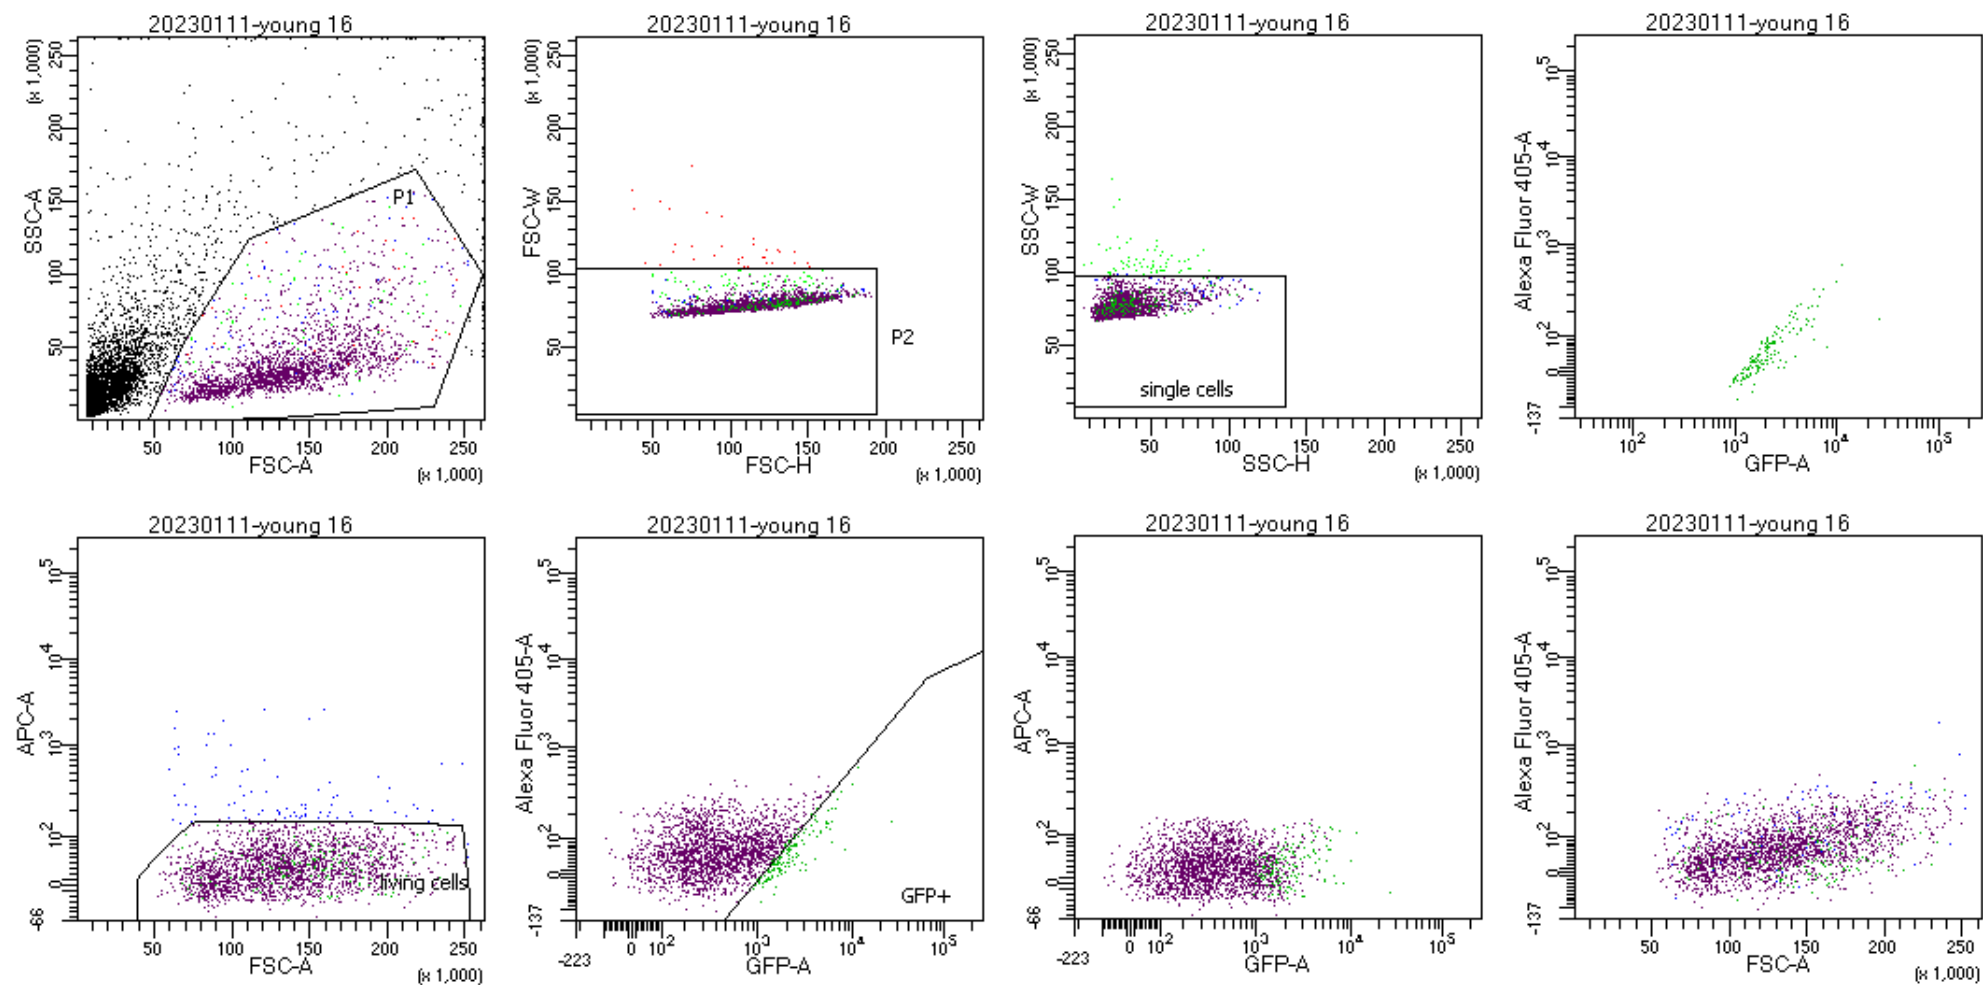

Tube: young 16

| Population   | #Events | %Parent | %Total |
|--------------|---------|---------|--------|
| All Events   | 6,508   | ####    | 100.0  |
| P1           | 2,310   | 35.5    | 35.5   |
| P2           | 2,277   | 98.6    | 35.0   |
| single cells | 2,213   | 97.2    | 34.0   |
| living cells | 2,130   | 96.2    | 32.7   |
| GFP+         | 140     | 6.6     | 2.2    |

# BD FACSDiva 9.0.1

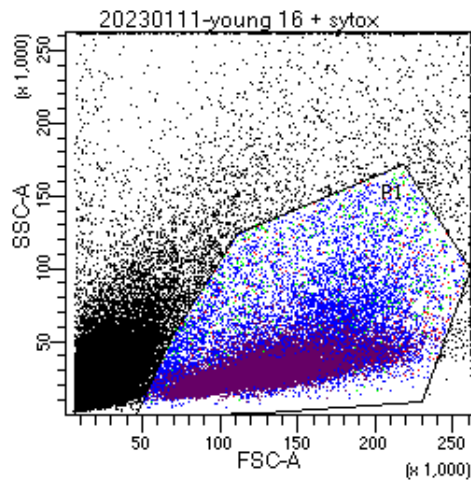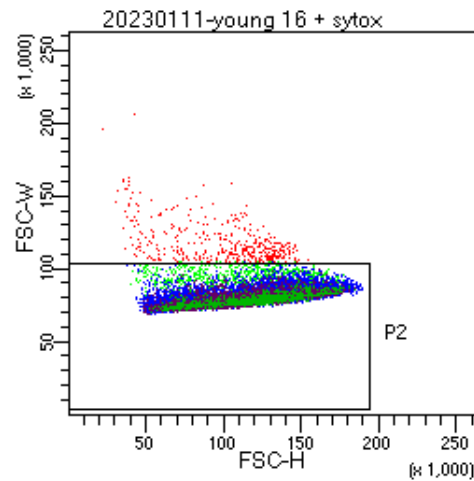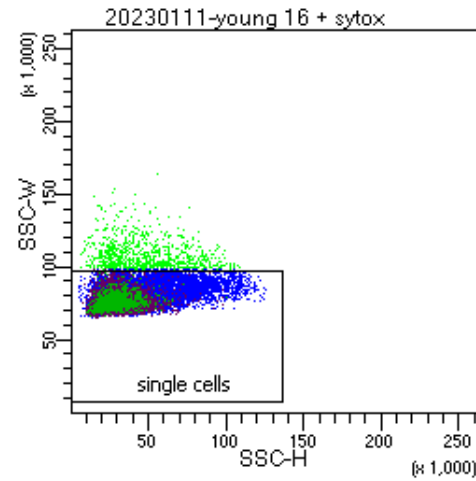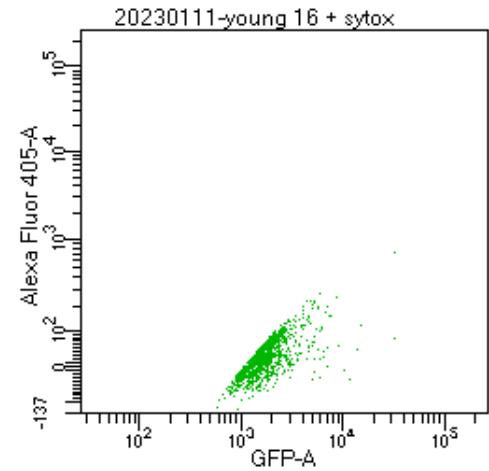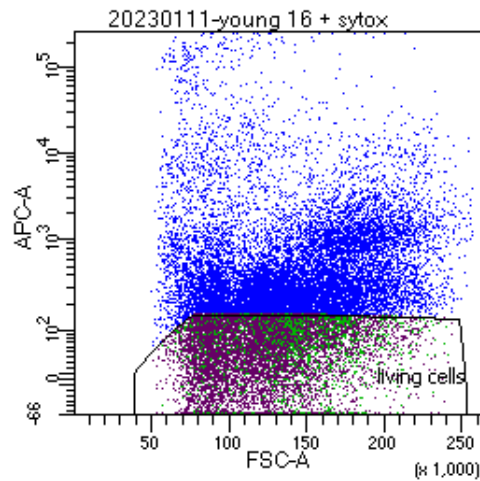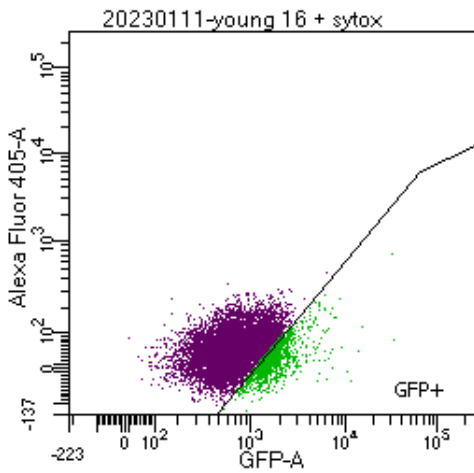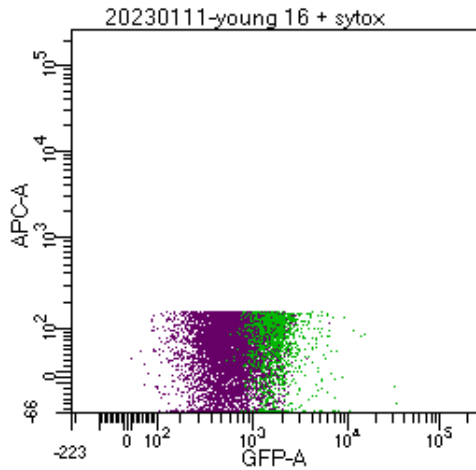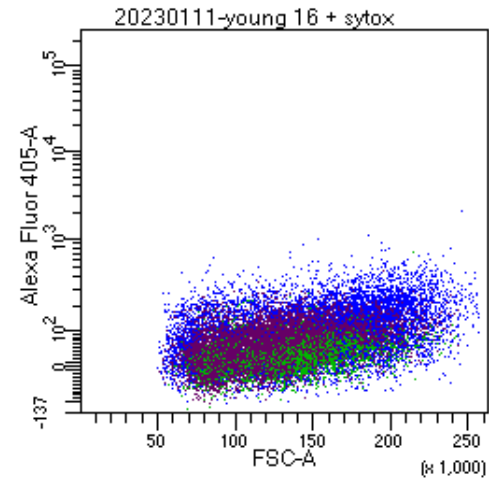

Tube: young 16 + sytox

| Population   | #Events | %Parent | %Total |
|--------------|---------|---------|--------|
| All Events   | 69,255  | ####    | 100.0  |
| P1           | 24,712  | 35.7    | 35.7   |
| P2           | 24,298  | 98.3    | 35.1   |
| single cells | 23,371  | 96.2    | 33.7   |
| living cells | 10,000  | 42.8    | 14.4   |
| GFP+         | 1,176   | 11.8    | 1.7    |
