# Supplementary material for: Generation of a transparent killifish line through multiplex CRISPR/Cas9mediated gene inactivation
Source: eLife journal article supplement (doi:10.7554/elife.81549), 2023-02-23

Clip: 1 BQ 20 WL 10 Sequence: p21\_#10\_F

Clipped length: 1206  
Left clip: 17  
Right clip: 1222  
Avg. qual. in clip.: 47.47

Samples: 18935  
Bases: 1469  
Average spacing: 13.0  
Average quality >= 10: 135, 20: 159, 30: 1035

Quality: 0 - 9  
10 - 19  
20 - 29  
≥ 30

Page: 1 / 4  
06.08.2020

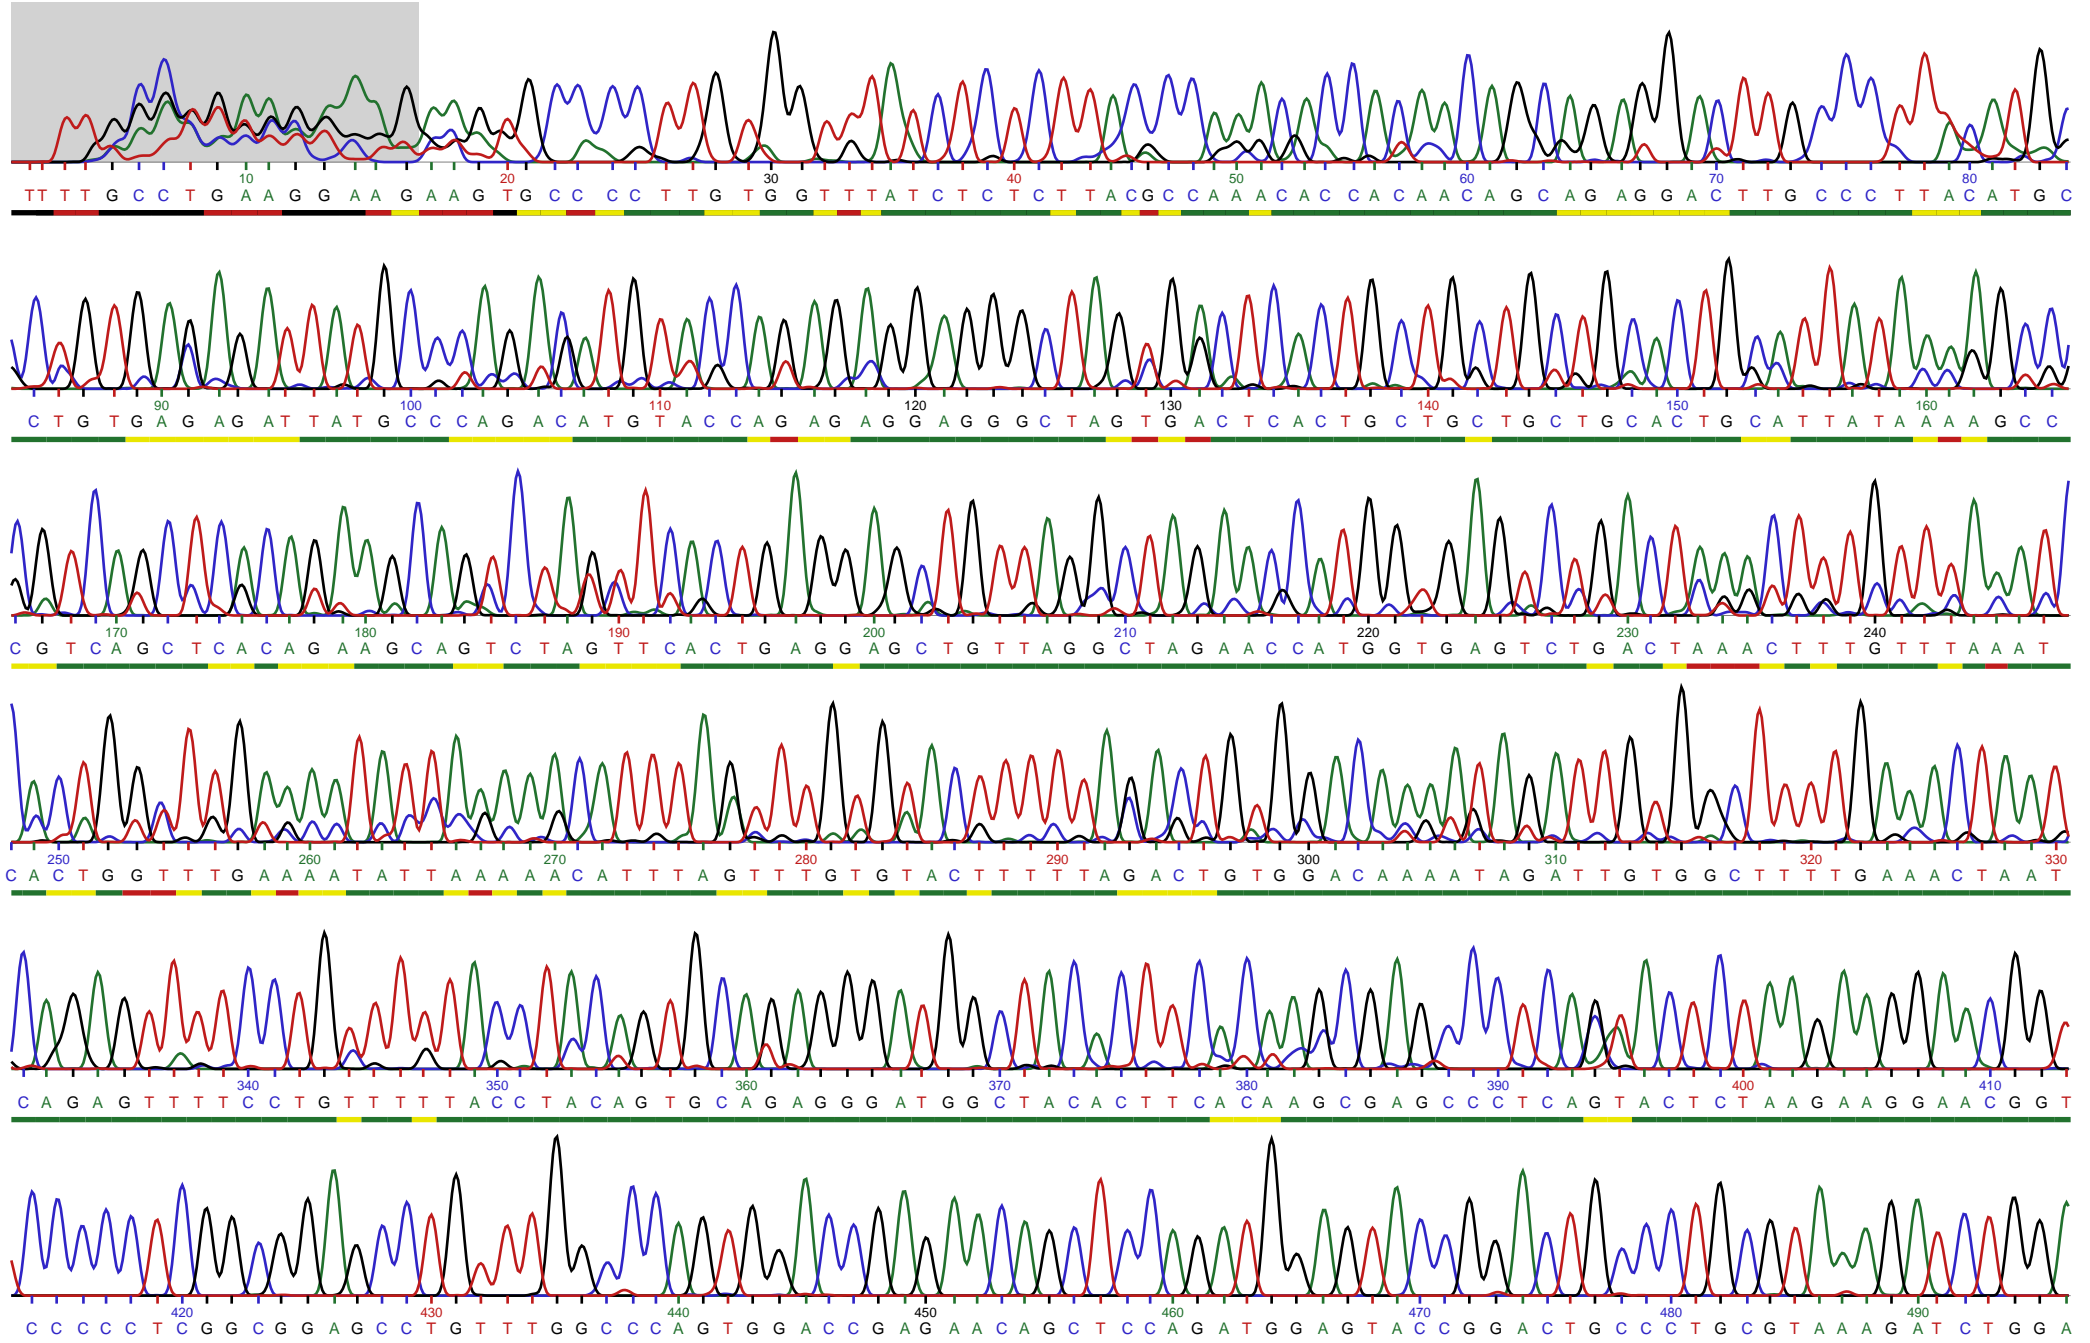

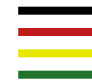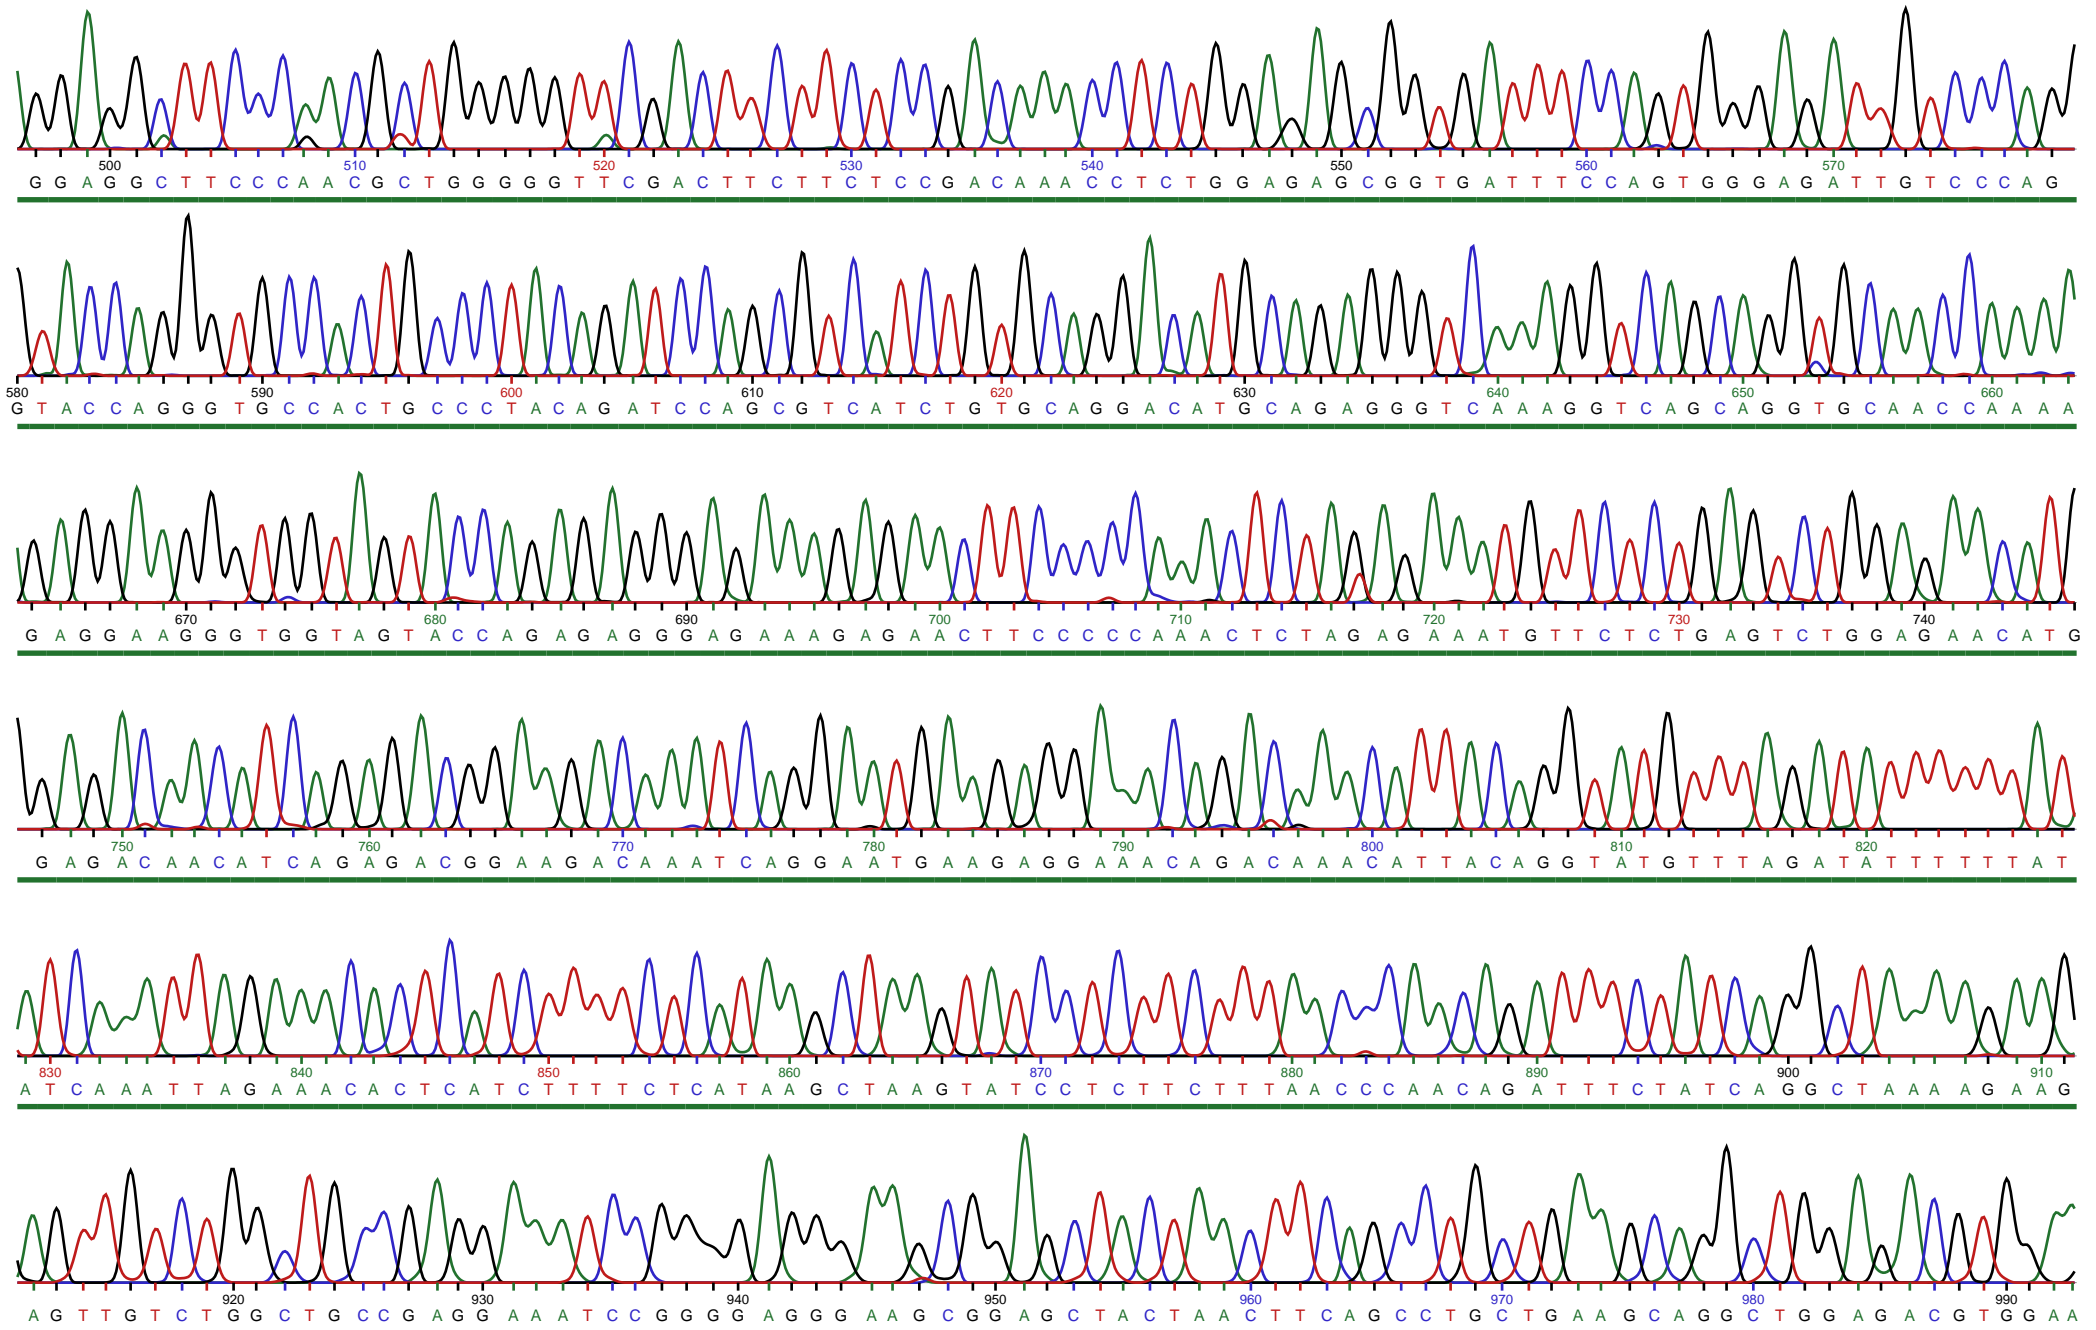

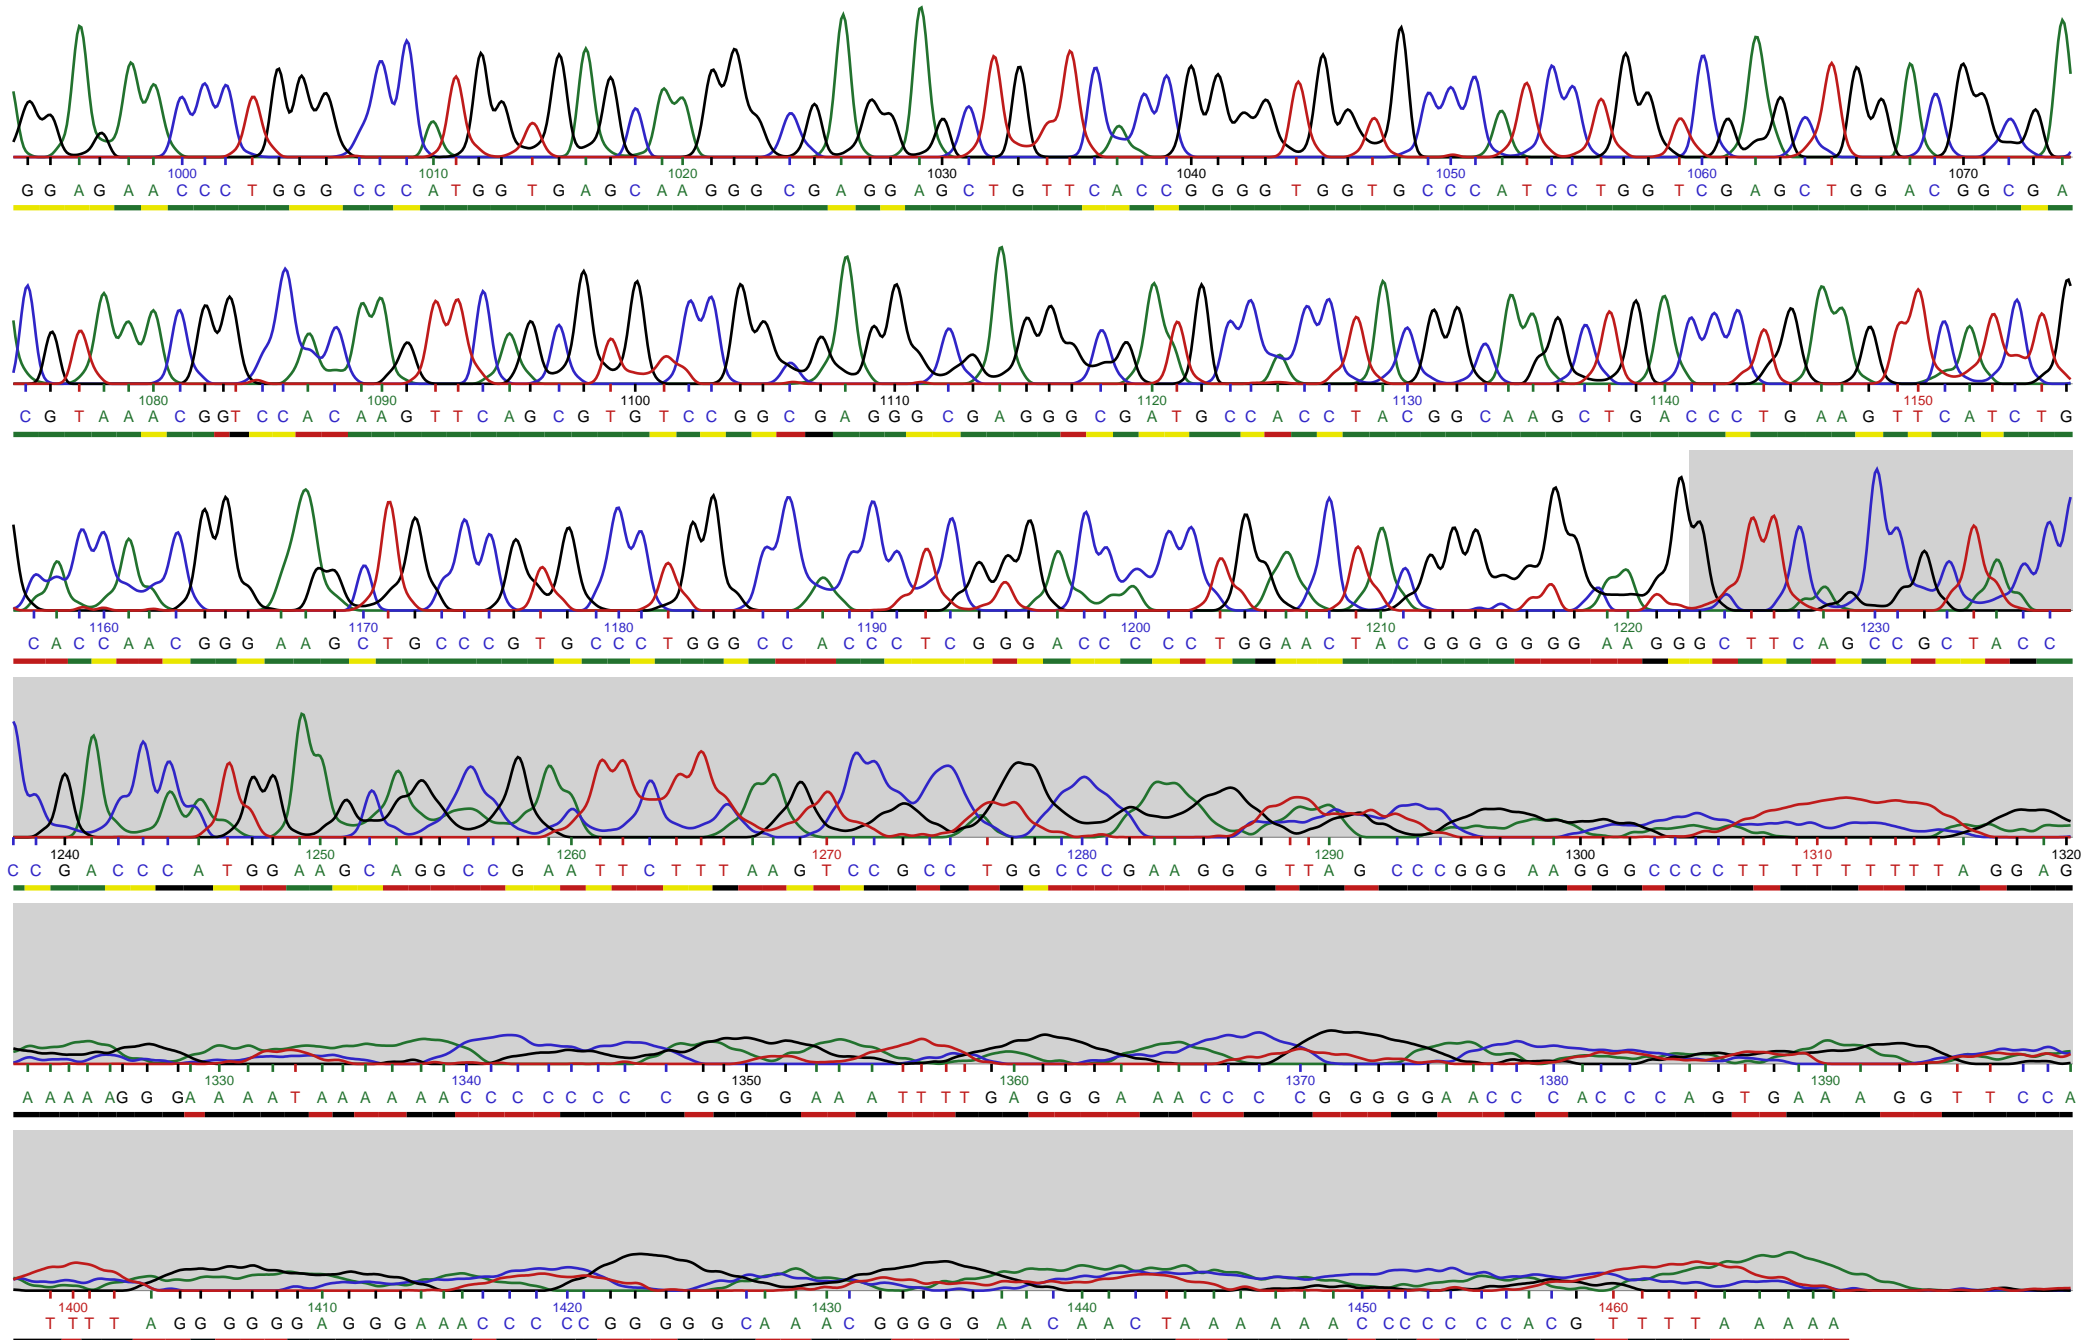

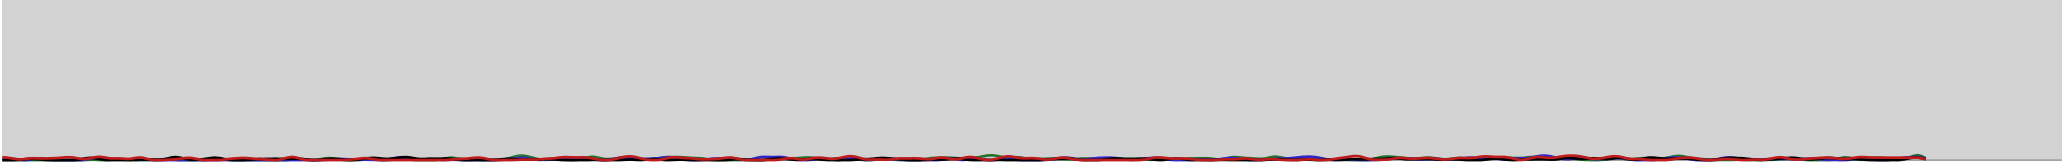

Supplement: fig5-figsupp1-data1 [file 10_F.pdf › Figure_5_figure_supplement_1_source_data/Figure_5_figure_supplement_1_panel_A_source_data/Originals_Sequencing_data/cdkn1a_10/p21_#10_F.pdf]
