# Supplementary material for: Generation of a transparent killifish line through multiplex CRISPR/Cas9mediated gene inactivation
Source: eLife journal article supplement (doi:10.7554/elife.81549), 2023-02-23
Supplement: fig5-figsupp1-data1 [file cdkn1a_sequencing.docx]

***cdkn1a* sequencing**

*>cdkn1a* donor template sequence

TCTTACACCAAACACCACAACAGCAGAGGACTTGCCCTTACATGCCTGTGAGAGATTATGCCCAGACATGTACCAGAGAGGAGGGCTAGTGACTCACTGCTGCTGCTGCACTGCATTATAAAAGCCCGTCAGCTCACAGAAGCAGTCTAGTTCACTGAGGAGCTGTTAGGCTAGAACCATGGTGAGTCTGACTAAACTTTGTTTAAATCACTGGTTTGAAAATATTAAAAACATTTAGTTTGTGTACTTTTTAGACTGTGGACAAAATAGATTGTGGCTTTTGAAACTAATCAGAGTTTTCCTGTTTTTACCTACAGTGCAGAGGGATGGCTACACTTCACAAGCGAGCCCTCAGTACTCTAAGAAGGAACGGTCCCCCTCGGCGGAGCCTGTTTGGCCCAGTGGACCGAGAACAGCTCCAGATGGAGTACCGGACTGCCCTGCGTAAAGATCTGGAGGAGGCTTCCCAACGCTGGGGGTTCGACTTCTTCTCCGACAAACCTCTGGAGAGCGGTGATTTCCAGTGGGAGATTGTCCCAGGTACCAGGGTGCCACTGCCCTACAGATCCAGCGTCATCTGTGCAGGACATGCAGAGGGTCAAAGGTCAGCAGGTGCAACCAAAAGAGGAAGGGTGGTAGTACCAGAGAGGGAGAAAGAGAACTTCCCCCAAACTCTAGAGAAATGTTCTCTGAGTCTGGAGAACATGGAGACAACATCAGAGACGGAAGACAAATCAGGAATGAAGAGGAAACAGACAAACATTACAGGTATGTTTAGATATTTTTTATATCAAATTAGAAACACTCATCTTTTCTCATAAGCTAAGTATCCTCTTCTTTAACCCAACAGATTTCTATCAGGCTAAAAGAAGAGTTGTCTGGCTGCCGAGGAAATCCGGGGAGGGAAGCGGAGCTACTAACTTCAGCCTGCTGAAGCAGGCTGGAGACGTGGAGGAGAACCCTGGGCCCATGGTGAGCAAGGGCGAGGAGCTGTTCACCGGGGTGGTGCCCATCCTGGTCGAGCTGGACGGCGACGTAAACGGCCACAAGTTCAGCGTGTCCGGCGAGGGCGAGGGCGATGCCACCTACGGCAAGCTGACCCTGAAGTTCATCTGCACCACCGGCAAGCTGCCCGTGCCCTGGCCCACCCTCGTGACCACCCTGACCTACGGCGTGCAGTGCTTCAGCCGCTACCCCGACCACATGAAGCAGCACGACTTCTTCAAGTCCGCCATGCCCGAAGGCTACGTCCAGGAGCGCACCATCTTCTTCAAGGACGACGGCAACTACAAGACCCGCGCCGAGGTGAAGTTCGAGGGCGACACCCTGGTGAACCGCATCGAGCTGAAGGGCATCGACTTCAAGGAGGACGGCAACATCCTGGGGCACAAGCTGGAGTACAACTACAACAGCCACAACGTCTATATCATGGCCGACAAGCAGAAGAACGGCATCAAGGTGAACTTCAAGATCCGCCACAACATCGAGGACGGCAGCGTGCAGCTCGCCGACCACTACCAGCAGAACACCCCCATCGGCGACGGCCCCGTGCTGCTGCCCGACAACCACTACCTGAGCACCCAGTCCGCCCTGAGCAAAGACCCCAACGAGAAGCGCGATCACATGGTCCTGCTGGAGTTCGTGACCGCCGCCGGGATCACTCTCGGCATGGACGAGCTGTACAAGGGAAGCGGAGCTACTAACTTCAGCCTGCTGAAGCAGGCTGGAGACGTGGAGGAGAACCCTGGGCCCATGGACATCATCTCTGTGGCTCTGAAGAGACATAGCACAAAGGCTTTTGATGCCAGCAAGAAACTGACCCCTGAGCAGGCTGAGCAGATCAAGACACTGCTGCAGTACAGCCCAAGCAGCcagAACAGCCAGCCTTGGCATTTTATTGTGGCTTCTACAGAGGAGGGAAAGGCTAGAGTGGCTAAGTCTGCTGCTGGAAATTATGTGTTCtctGAGAGAAAGATGCTGGATGCCTCTCATGTGGTGGTGTTCTGTGCTAAGACAGCCATGGATGATGTGTGGCTGAAACTGGTGGTGGACCAGGAGGATGCTGATGGAAGATTTGCCACACCTGAGGCTAAGGCTGCTAATGATAAGGGAAGAAAGTTCacaGCTGATATGCACAGAAAGGACCTGCATGATGATGCTGAGTGGATGGCTAAGCAGGTGTATCTGAATGTGGGAAACTTCCTGCTGGGAGTGGCTGCTCTGGGACTGGATGCTGTGCCTATTGAGGGATTTGATGCTGCTATCCTGGATGCTGAGTTTGGACTGAAGGAGAAGGGATACACCAGCCTGGTGGTGGTGCCAGTGGGACACCACTCTGTGGAGGATTTTAATGCTACACTGCCTAAGAGCAGACTGCCTCAGAACATCACCCTGACAGAGGTGTAATATTTCCTTTGAAGGTGCCAAAACTCCCAAGAGAACCAGACAAAGAACCAGCACCTCCTTCAGGAATCAGTTGTTCCACACCGAGCAGCGGGAGTGCTGAATCATCCAACAAAAAAAAAACAAAAAAAAGAAAAAAAAAACCCAGAAGGCACCAGGCTAATTAAGATGCTGCATGTGTGAGGGGTCTGGTGTTTTCTGTCCACGCTGCAGTTAAGAAGGTGACATTTGAGCAGAGAAGATTAACAGTAATCTCTGGAATCAGTGGATTTATACTCATTTGGACTGAGAGCTCGCCAAATTGCTGACTGACATTTGTTACGGCGCGTCACACAGCTCTTAACCCTCTCGGTCTCGTTTTGATAAAAGGACGAACAACTAAGTCCTTCAGGGGTGCTTCTGAGTTAAAAAATGCTCATGAGATACTTGTGTGGAGTAACCAGGTAGGTAGGTTTTAACTGTTGCAGATCTGCGATGCCTGCCTCCAGAGGGTTAAAACACAATCACATCTCAGTTTGGTGGGACTTCTGCCTGTTTGAGGATGAAAAGCAGACGTGCGAACAAATATCAGGACTCAGATTAATACGTTTCTGTGGCAAAGCCGCAGGAAAGCTAAAAACAGGAGAGCTTTGTCTATTTTGTTCAAATCTATAATTGTTTTTCTACGTCTTTTTATAGGAGTTTTTTTTAAGTGCATTATATTTTACATCGGGGGTTCCCAATCCTGGCCCTGGAGGGCTGGTATCCAGCAGGTTTTGTGGTTTTTCTGCTCCAACAGACTTGATTCAGTGGTTGAAACGCCTGTGCAGCAGCTCATCAGGCTCTGCAGAAGCCTGTTAATGAGCTGCTGATTGAAATCAGGTGTGTTGAAACAGAATTCAAACTAAAACATGCAGGATACCGG

>GFP-positive_#10

AAGTGCCCCTTGTGGTTTATCTCTCTTACGCCAAACACCACAACAGCAGAGGACTTGCCCTTACATGCCTGTGAGAGATTATGCCCAGACATGTACCAGAGAGGAGGGCTAGTGACTCACTGCTGCTGCTGCACTGCATTATAAAAGCCCGTCAGCTCACAGAAGCAGTCTAGTTCACTGAGGAGCTGTTAGGCTAGAACCATGGTGAGTCTGACTAAACTTTGTTTAAATCACTGGTTTGAAAATATTAAAAACATTTAGTTTGTGTACTTTTTAGACTGTGGACAAAATAGATTGTGGCTTTTGAAACTAATCAGAGTTTTCCTGTTTTTACCTACAGTGCAGAGGGATGGCTACACTTCACAAGCGAGCCCTCAGTACTCTAAGAAGGAACGGTCCCCCTCGGCGGAGCCTGTTTGGCCCAGTGGACCGAGAACAGCTCCAGATGGAGTACCGGACTGCCCTGCGTAAAGATCTGGAGGAGGCTTCCCAACGCTGGGGGTTCGACTTCTTCTCCGACAAACCTCTGGAGAGCGGTGATTTCCAGTGGGAGATTGTCCCAGGTACCAGGGTGCCACTGCCCTACAGATCCAGCGTCATCTGTGCAGGACATGCAGAGGGTCAAAGGTCAGCAGGTGCAACCAAAAGAGGAAGGGTGGTAGTACCAGAGAGGGAGAAAGAGAACTTCCCCCAAACTCTAGAGAAATGTTCTCTGAGTCTGGAGAACATGGAGACAACATCAGAGACGGAAGACAAATCAGGAATGAAGAGGAAACAGACAAACATTACAGGTATGTTTAGATATTTTTTATATCAAATTAGAAACACTCATCTTTTCTCATAAGCTAAGTATCCTCTTCTTTAACCCAACAGATTTCTATCAGGCTAAAAGAAGAGTTGTCTGGCTGCCGAGGAAATCCGGGGAGGGAAGCGGAGCTACTAACTTCAGCCTGCTGAAGCAGGCTGGAGACGTGGAAGGAGAACCCTGGGCCCATGGTGAGCAAGGGCGAGGAGCTGTTCACCGGGGTGGTGCCCATCCTGGTCGAGCTGGACGGCGACGTAAACGGTCCACAAGTTCAGCGTGTCCGGCGAGGGCGAGGGCGATGCCACCTACGGCAAGCTGACCCTGAAGTTCATCTGCACCAACGGGAAGCTGCCCGTGCCCTGGGCCACCCTCGGGACCCCCTGGAACTACGGGGGGGAAGG
