# Supplementary material for: Generation of a transparent killifish line through multiplex CRISPR/Cas9mediated gene inactivation
Source: eLife journal article supplement (doi:10.7554/elife.81549), 2023-02-23
Supplement: fig5-figsupp2-data1 [file cells Mtz_ qRT-data_calculation_table-AKR1.xlsx]

## Sheet: (1) primer efficiency
genes meta:	ref. gene 1	ref. gene 2	gene 1	gene 2	gene 3	gene 4	gene 5	gene 6	gene 7	gene 8	gene 9	gene 10	gene 11	gene 12
	rpl13a	ref. gene 2	p21	gfp	ntr	gene 4	gene 5	gene 6	gene 7	gene 8	gene 9	gene 10	gene 11	gene 12
tec. Rep. = technical replicate		data input				ref. = reference				primer efficiency												Remark: To autofill the names of newly added genes (13+), define a name for the respective data input cell (e.g. cell_name) by selecting it, going to the tab "Formulas" and "Define Name". By entering "=cell_name" into any cell throughout the workbook, you can autofill the gene name from the data input cell. For inspiration on cell names, see "Formulas", "Name Manager".
		Ct values
		rpl13a					y=mx+b			E=10^(-1/m)	E%=(E-1)*100
cDNA input (ng)	log cDNA input	tec. Rep. 1	tec. Rep. 2	tec. Rep. 3	mean		m	b	R2	E	E%
0.87	-0.0604807	25.7841	25.809	25.7986	25.7972		-2.89491	25.4859	0.983779	2.2153	121.53
0.435	-0.361511	26.2177	26.4954	26.3734	26.3622
0.2175	-0.662541	27.3711	27.312	27.3248	27.336
0.10875	-0.963571	28.1847	28.4962	28.4515	28.3775
		ref. gene 2					y=mx+b			E=10^(-1/m)	E%=(E-1)*100
cDNA input (ng)	log cDNA input	tec. Rep. 1	tec. Rep. 2	tec. Rep. 3	mean		m	b	R2	E	E%
0.87	-0.0604807				#DIV/0!		#DIV/0!	#DIV/0!	#DIV/0!	#DIV/0!	#DIV/0!
0.435	-0.361511				#DIV/0!
0.2175	-0.662541				#DIV/0!
0.10875	-0.963571				#DIV/0!
		p21					y=mx+b			E=10^(-1/m)	E%=(E-1)*100
cDNA input (ng)	log cDNA input	tec. Rep. 1	tec. Rep. 2	tec. Rep. 3	mean		m	b	R2	E	E%
0.87	-0.0604807	26.9676	27.0498	27.2735	27.097		-3.10398	26.7275	0.973282	2.09975	109.975
0.435	-0.361511	27.5218	27.8378	27.5832	27.6476
0.2175	-0.662541	28.4893	28.6022	28.8371	28.6429
0.10875	-0.963571	29.7021	29.9926	29.9449	29.8799
		gfp					y=mx+b			E=10^(-1/m)	E%=(E-1)*100
cDNA input (ng)	log cDNA input	tec. Rep. 1	tec. Rep. 2	tec. Rep. 3	mean		m	b	R2	E	E%
0.87	-0.0604807	27.5347	27.4627	27.5019	27.4998		-3.04908	27.2144	0.991686	2.12798	112.798
0.435	-0.361511	28.1611	28.2053	28.2248	28.1971
0.2175	-0.662541	29.0249	29.2207	29.2671	29.1709
0.10875	-0.963571	30.0909	30.3541	30.259	30.2347
		ntr					y=mx+b			E=10^(-1/m)	E%=(E-1)*100
cDNA input (ng)	log cDNA input	tec. Rep. 1	tec. Rep. 2	tec. Rep. 3	mean		m	b	R2	E	E%
0.87	-0.0604807	27.0698	27.0345	27.3391	27.1478		-3.3231	26.9571	0.983427	1.99951	99.9511
0.435	-0.361511	28.0338	28.0487	28.079	28.0538
0.2175	-0.662541	29.7338	29.3496	29.1129	29.3988
0.10875	-0.963571	30.0402	29.8581	30.2036	30.034
		gene 4					y=mx+b			E=10^(-1/m)	E%=(E-1)*100
cDNA input (ng)	log cDNA input	tec. Rep. 1	tec. Rep. 2	tec. Rep. 3	mean		m	b	R2	E	E%
0.87	-0.0604807				#DIV/0!		#DIV/0!	#DIV/0!	#DIV/0!	#DIV/0!	#DIV/0!
0.435	-0.361511				#DIV/0!
0.2175	-0.662541				#DIV/0!
0.10875	-0.963571				#DIV/0!
		gene 5					y=mx+b			E=10^(-1/m)	E%=(E-1)*100
cDNA input (ng)	log cDNA input	tec. Rep. 1	tec. Rep. 2	tec. Rep. 3	mean		m	b	R2	E	E%
0.87	-0.0604807				#DIV/0!		#DIV/0!	#DIV/0!	#DIV/0!	#DIV/0!	#DIV/0!
0.435	-0.361511				#DIV/0!
0.2175	-0.662541				#DIV/0!
0.10875	-0.963571				#DIV/0!
		gene 6					y=mx+b			E=10^(-1/m)	E%=(E-1)*100
cDNA input (ng)	log cDNA input	tec. Rep. 1	tec. Rep. 2	tec. Rep. 3	mean		m	b	R2	E	E%
0.87	-0.0604807				#DIV/0!		#DIV/0!	#DIV/0!	#DIV/0!	#DIV/0!	#DIV/0!
0.435	-0.361511				#DIV/0!
0.2175	-0.662541				#DIV/0!
0.10875	-0.963571				#DIV/0!
		gene 7					y=mx+b			E=10^(-1/m)	E%=(E-1)*100
cDNA input (ng)	log cDNA input	tec. Rep. 1	tec. Rep. 2	tec. Rep. 3	mean		m	b	R2	E	E%
0.87	-0.0604807				#DIV/0!		#DIV/0!	#DIV/0!	#DIV/0!	#DIV/0!	#DIV/0!
0.435	-0.361511				#DIV/0!
0.2175	-0.662541				#DIV/0!
0.10875	-0.963571				#DIV/0!
		gene 8					y=mx+b			E=10^(-1/m)	E%=(E-1)*100
cDNA input (ng)	log cDNA input	tec. Rep. 1	tec. Rep. 2	tec. Rep. 3	mean		m	b	R2	E	E%
0.87	-0.0604807				#DIV/0!		#DIV/0!	#DIV/0!	#DIV/0!	#DIV/0!	#DIV/0!
0.435	-0.361511				#DIV/0!
0.2175	-0.662541				#DIV/0!
0.10875	-0.963571				#DIV/0!
		gene 9					y=mx+b			E=10^(-1/m)	E%=(E-1)*100
cDNA input (ng)	log cDNA input	tec. Rep. 1	tec. Rep. 2	tec. Rep. 3	mean		m	b	R2	E	E%
0.87	-0.0604807				#DIV/0!		#DIV/0!	#DIV/0!	#DIV/0!	#DIV/0!	#DIV/0!
0.435	-0.361511				#DIV/0!
0.2175	-0.662541				#DIV/0!
0.10875	-0.963571				#DIV/0!
		gene 10					y=mx+b			E=10^(-1/m)	E%=(E-1)*100
cDNA input (ng)	log cDNA input	tec. Rep. 1	tec. Rep. 2	tec. Rep. 3	mean		m	b	R2	E	E%
0.87	-0.0604807				#DIV/0!		#DIV/0!	#DIV/0!	#DIV/0!	#DIV/0!	#DIV/0!
0.435	-0.361511				#DIV/0!
0.2175	-0.662541				#DIV/0!
0.10875	-0.963571				#DIV/0!
		gene 11					y=mx+b			E=10^(-1/m)	E%=(E-1)*100
cDNA input (ng)	log cDNA input	tec. Rep. 1	tec. Rep. 2	tec. Rep. 3	mean		m	b	R2	E	E%
0.87	-0.0604807				#DIV/0!		#DIV/0!	#DIV/0!	#DIV/0!	#DIV/0!	#DIV/0!
0.435	-0.361511				#DIV/0!
0.2175	-0.662541				#DIV/0!
0.10875	-0.963571				#DIV/0!
		gene 12					y=mx+b			E=10^(-1/m)	E%=(E-1)*100
cDNA input (ng)	log cDNA input	tec. Rep. 1	tec. Rep. 2	tec. Rep. 3	mean		m	b	R2	E	E%
0.87	-0.0604807				#DIV/0!		#DIV/0!	#DIV/0!	#DIV/0!	#DIV/0!	#DIV/0!
0.435	-0.361511				#DIV/0!
0.2175	-0.662541				#DIV/0!
0.10875	-0.963571				#DIV/0!

## Sheet: (2a) fold change n<=12
Cts = means of (1-3) technical replicates per biological replicate, external calculation;								ref.= reference;		cond.= condition;		FC = fold change
data input				data output columns
choose ref. genes (1/2/b for both):				Remark for the addition of further genes by extending the spread sheet to the right: The E formula needs to be altered by changing the row number of the cells from column J and K of tab "(1) primer efficiency" to the respective value in row 10 of the current tab (automatically calculated).
	rpl13a	ref. gene 2	p21			gfp			ntr			gene 4			gene 5			gene 6			gene 7			gene 8			gene 9			gene 10			gene 11			gene 12
E =	2.2153	2	2.09975	(1) J & K:	24	2.12798	(1) J & K:	31	1.99951	(1) J & K:	38	2	(1) J & K:	45	2	(1) J & K:	52	2	(1) J & K:	59	2	(1) J & K:	66	2	(1) J & K:	73	2	(1) J & K:	80	2	(1) J & K:	87	2	(1) J & K:	94	2	(1) J & K:	101
ref. cond. mean Ct:	22.9423	#DIV/0!	26.7152			27.2665			26.2723			#DIV/0!			#DIV/0!			#DIV/0!			#DIV/0!			#DIV/0!			#DIV/0!			#DIV/0!			#DIV/0!			#DIV/0!
DNMSO non-irr	Cts	Cts	Cts	FC	log2(FC)	Cts	FC	log2(FC)	Cts	FC	log2(FC)	Cts	FC	log2(FC)	Cts	FC	log2(FC)	Cts	FC	log2(FC)	Cts	FC	log2(FC)	Cts	FC	log2(FC)	Cts	FC	log2(FC)	Cts	FC	log2(FC)	Cts	FC	log2(FC)	Cts	FC	log2(FC)
DMSO nonr #1	22.4737		25.327	1.92926	0.948047	26.0643	1.70783	0.772164	25.5478	1.13803	0.186544		#DIV/0!	#DIV/0!		#DIV/0!	#DIV/0!		#DIV/0!	#DIV/0!		#DIV/0!	#DIV/0!		#DIV/0!	#DIV/0!		#DIV/0!	#DIV/0!		#DIV/0!	#DIV/0!		#DIV/0!	#DIV/0!		#DIV/0!	#DIV/0!
DMSO nonr #2	22.2004		28.5842	0.138559	-2.85143	28.6004	0.202429	-2.30451	26.8536	0.370512	-1.43241		#DIV/0!	#DIV/0!		#DIV/0!	#DIV/0!		#DIV/0!	#DIV/0!		#DIV/0!	#DIV/0!		#DIV/0!	#DIV/0!		#DIV/0!	#DIV/0!		#DIV/0!	#DIV/0!		#DIV/0!	#DIV/0!		#DIV/0!	#DIV/0!
DMSO nonr #3	22.6073		26.8093	0.714487	-0.48502	27.5073	0.638738	-0.646704	25.9921	0.930251	-0.104309		#DIV/0!	#DIV/0!		#DIV/0!	#DIV/0!		#DIV/0!	#DIV/0!		#DIV/0!	#DIV/0!		#DIV/0!	#DIV/0!		#DIV/0!	#DIV/0!		#DIV/0!	#DIV/0!		#DIV/0!	#DIV/0!		#DIV/0!	#DIV/0!
DMSO nonr #4	24.4876		26.1405	5.23577	2.3884	26.8941	4.52856	2.17905	26.6955	2.54943	1.35017		#DIV/0!	#DIV/0!		#DIV/0!	#DIV/0!		#DIV/0!	#DIV/0!		#DIV/0!	#DIV/0!		#DIV/0!	#DIV/0!		#DIV/0!	#DIV/0!		#DIV/0!	#DIV/0!		#DIV/0!	#DIV/0!		#DIV/0!	#DIV/0!
				4.80568	2.26474		10.4118	3.38015		0.957043	-0.0633444		#DIV/0!	#DIV/0!		#DIV/0!	#DIV/0!		#DIV/0!	#DIV/0!		#DIV/0!	#DIV/0!		#DIV/0!	#DIV/0!		#DIV/0!	#DIV/0!		#DIV/0!	#DIV/0!		#DIV/0!	#DIV/0!		#DIV/0!	#DIV/0!
				4.80568	2.26474		10.4118	3.38015		0.957043	-0.0633444		#DIV/0!	#DIV/0!		#DIV/0!	#DIV/0!		#DIV/0!	#DIV/0!		#DIV/0!	#DIV/0!		#DIV/0!	#DIV/0!		#DIV/0!	#DIV/0!		#DIV/0!	#DIV/0!		#DIV/0!	#DIV/0!		#DIV/0!	#DIV/0!
				4.80568	2.26474		10.4118	3.38015		0.957043	-0.0633444		#DIV/0!	#DIV/0!		#DIV/0!	#DIV/0!		#DIV/0!	#DIV/0!		#DIV/0!	#DIV/0!		#DIV/0!	#DIV/0!		#DIV/0!	#DIV/0!		#DIV/0!	#DIV/0!		#DIV/0!	#DIV/0!		#DIV/0!	#DIV/0!
				4.80568	2.26474		10.4118	3.38015		0.957043	-0.0633444		#DIV/0!	#DIV/0!		#DIV/0!	#DIV/0!		#DIV/0!	#DIV/0!		#DIV/0!	#DIV/0!		#DIV/0!	#DIV/0!		#DIV/0!	#DIV/0!		#DIV/0!	#DIV/0!		#DIV/0!	#DIV/0!		#DIV/0!	#DIV/0!
				4.80568	2.26474		10.4118	3.38015		0.957043	-0.0633444		#DIV/0!	#DIV/0!		#DIV/0!	#DIV/0!		#DIV/0!	#DIV/0!		#DIV/0!	#DIV/0!		#DIV/0!	#DIV/0!		#DIV/0!	#DIV/0!		#DIV/0!	#DIV/0!		#DIV/0!	#DIV/0!		#DIV/0!	#DIV/0!
				4.80568	2.26474		10.4118	3.38015		0.957043	-0.0633444		#DIV/0!	#DIV/0!		#DIV/0!	#DIV/0!		#DIV/0!	#DIV/0!		#DIV/0!	#DIV/0!		#DIV/0!	#DIV/0!		#DIV/0!	#DIV/0!		#DIV/0!	#DIV/0!		#DIV/0!	#DIV/0!		#DIV/0!	#DIV/0!
				4.80568	2.26474		10.4118	3.38015		0.957043	-0.0633444		#DIV/0!	#DIV/0!		#DIV/0!	#DIV/0!		#DIV/0!	#DIV/0!		#DIV/0!	#DIV/0!		#DIV/0!	#DIV/0!		#DIV/0!	#DIV/0!		#DIV/0!	#DIV/0!		#DIV/0!	#DIV/0!		#DIV/0!	#DIV/0!
				4.80568	2.26474		10.4118	3.38015		0.957043	-0.0633444		#DIV/0!	#DIV/0!		#DIV/0!	#DIV/0!		#DIV/0!	#DIV/0!		#DIV/0!	#DIV/0!		#DIV/0!	#DIV/0!		#DIV/0!	#DIV/0!		#DIV/0!	#DIV/0!		#DIV/0!	#DIV/0!		#DIV/0!	#DIV/0!
DMSO irr	Cts	Cts	Cts	FC	log2(FC)	Cts	FC	log2(FC)	Cts	FC	log2(FC)	Cts	FC	log2(FC)	Cts	FC	log2(FC)	Cts	FC	log2(FC)	Cts	FC	log2(FC)	Cts	FC	log2(FC)	Cts	FC	log2(FC)	Cts	FC	log2(FC)	Cts	FC	log2(FC)	Cts	FC	log2(FC)
DMSO irr #1	22.8092		25.6367	2.00211	1.00152	26.3069	1.85678	0.8928	25.4101	1.6348	0.709113		#DIV/0!	#DIV/0!		#DIV/0!	#DIV/0!		#DIV/0!	#DIV/0!		#DIV/0!	#DIV/0!		#DIV/0!	#DIV/0!		#DIV/0!	#DIV/0!		#DIV/0!	#DIV/0!		#DIV/0!	#DIV/0!		#DIV/0!	#DIV/0!
DMSO irr #2	23.3065		25.9233	2.40418	1.26555	26.3404	2.68873	1.42692	25.8114	1.83871	0.878696		#DIV/0!	#DIV/0!		#DIV/0!	#DIV/0!		#DIV/0!	#DIV/0!		#DIV/0!	#DIV/0!		#DIV/0!	#DIV/0!		#DIV/0!	#DIV/0!		#DIV/0!	#DIV/0!		#DIV/0!	#DIV/0!		#DIV/0!	#DIV/0!
DMSO irr #3	25.6834		26.6427	9.33805	3.22312	27.1363	9.76286	3.2873	27.5662	3.60992	1.85197		#DIV/0!	#DIV/0!		#DIV/0!	#DIV/0!		#DIV/0!	#DIV/0!		#DIV/0!	#DIV/0!		#DIV/0!	#DIV/0!		#DIV/0!	#DIV/0!		#DIV/0!	#DIV/0!		#DIV/0!	#DIV/0!		#DIV/0!	#DIV/0!
DMSO irr #4	23.9979		25.3451	6.39805	2.67763	26.0259	5.90909	2.56294	25.614	3.65356	1.8693		#DIV/0!	#DIV/0!		#DIV/0!	#DIV/0!		#DIV/0!	#DIV/0!		#DIV/0!	#DIV/0!		#DIV/0!	#DIV/0!		#DIV/0!	#DIV/0!		#DIV/0!	#DIV/0!		#DIV/0!	#DIV/0!		#DIV/0!	#DIV/0!
				4.80568	2.26474		10.4118	3.38015		0.957043	-0.0633444		#DIV/0!	#DIV/0!		#DIV/0!	#DIV/0!		#DIV/0!	#DIV/0!		#DIV/0!	#DIV/0!		#DIV/0!	#DIV/0!		#DIV/0!	#DIV/0!		#DIV/0!	#DIV/0!		#DIV/0!	#DIV/0!		#DIV/0!	#DIV/0!
				4.80568	2.26474		10.4118	3.38015		0.957043	-0.0633444		#DIV/0!	#DIV/0!		#DIV/0!	#DIV/0!		#DIV/0!	#DIV/0!		#DIV/0!	#DIV/0!		#DIV/0!	#DIV/0!		#DIV/0!	#DIV/0!		#DIV/0!	#DIV/0!		#DIV/0!	#DIV/0!		#DIV/0!	#DIV/0!
				4.80568	2.26474		10.4118	3.38015		0.957043	-0.0633444		#DIV/0!	#DIV/0!		#DIV/0!	#DIV/0!		#DIV/0!	#DIV/0!		#DIV/0!	#DIV/0!		#DIV/0!	#DIV/0!		#DIV/0!	#DIV/0!		#DIV/0!	#DIV/0!		#DIV/0!	#DIV/0!		#DIV/0!	#DIV/0!
				4.80568	2.26474		10.4118	3.38015		0.957043	-0.0633444		#DIV/0!	#DIV/0!		#DIV/0!	#DIV/0!		#DIV/0!	#DIV/0!		#DIV/0!	#DIV/0!		#DIV/0!	#DIV/0!		#DIV/0!	#DIV/0!		#DIV/0!	#DIV/0!		#DIV/0!	#DIV/0!		#DIV/0!	#DIV/0!
				4.80568	2.26474		10.4118	3.38015		0.957043	-0.0633444		#DIV/0!	#DIV/0!		#DIV/0!	#DIV/0!		#DIV/0!	#DIV/0!		#DIV/0!	#DIV/0!		#DIV/0!	#DIV/0!		#DIV/0!	#DIV/0!		#DIV/0!	#DIV/0!		#DIV/0!	#DIV/0!		#DIV/0!	#DIV/0!
				4.80568	2.26474		10.4118	3.38015		0.957043	-0.0633444		#DIV/0!	#DIV/0!		#DIV/0!	#DIV/0!		#DIV/0!	#DIV/0!		#DIV/0!	#DIV/0!		#DIV/0!	#DIV/0!		#DIV/0!	#DIV/0!		#DIV/0!	#DIV/0!		#DIV/0!	#DIV/0!		#DIV/0!	#DIV/0!
				4.80568	2.26474		10.4118	3.38015		0.957043	-0.0633444		#DIV/0!	#DIV/0!		#DIV/0!	#DIV/0!		#DIV/0!	#DIV/0!		#DIV/0!	#DIV/0!		#DIV/0!	#DIV/0!		#DIV/0!	#DIV/0!		#DIV/0!	#DIV/0!		#DIV/0!	#DIV/0!		#DIV/0!	#DIV/0!
				4.80568	2.26474		10.4118	3.38015		0.957043	-0.0633444		#DIV/0!	#DIV/0!		#DIV/0!	#DIV/0!		#DIV/0!	#DIV/0!		#DIV/0!	#DIV/0!		#DIV/0!	#DIV/0!		#DIV/0!	#DIV/0!		#DIV/0!	#DIV/0!		#DIV/0!	#DIV/0!		#DIV/0!	#DIV/0!
Mtz non-irr	Cts	Cts	Cts	FC	log2(FC)	Cts	FC	log2(FC)	Cts	FC	log2(FC)	Cts	FC	log2(FC)	Cts	FC	log2(FC)	Cts	FC	log2(FC)	Cts	FC	log2(FC)	Cts	FC	log2(FC)	Cts	FC	log2(FC)	Cts	FC	log2(FC)	Cts	FC	log2(FC)	Cts	FC	log2(FC)
Mtz non #1	22.2807		26.3312	0.785592	-0.348149	26.9132	0.771563	-0.374144	25.6239	0.925996	-0.110923		#DIV/0!	#DIV/0!		#DIV/0!	#DIV/0!		#DIV/0!	#DIV/0!		#DIV/0!	#DIV/0!		#DIV/0!	#DIV/0!		#DIV/0!	#DIV/0!		#DIV/0!	#DIV/0!		#DIV/0!	#DIV/0!		#DIV/0!	#DIV/0!
Mtz non #2	22.6504		28.1413	0.275259	-1.86114	28.3849	0.340717	-1.55336	26.9291	0.502924	-0.991586		#DIV/0!	#DIV/0!		#DIV/0!	#DIV/0!		#DIV/0!	#DIV/0!		#DIV/0!	#DIV/0!		#DIV/0!	#DIV/0!		#DIV/0!	#DIV/0!		#DIV/0!	#DIV/0!		#DIV/0!	#DIV/0!		#DIV/0!	#DIV/0!
Mtz non #3	23.6741		26.04	2.95353	1.56244	26.5016	3.18902	1.67311	26.0144	2.13987	1.09752		#DIV/0!	#DIV/0!		#DIV/0!	#DIV/0!		#DIV/0!	#DIV/0!		#DIV/0!	#DIV/0!		#DIV/0!	#DIV/0!		#DIV/0!	#DIV/0!		#DIV/0!	#DIV/0!		#DIV/0!	#DIV/0!		#DIV/0!	#DIV/0!
Mtz non #4	23.143		27.8785	0.494939	-1.01468	28.1842	0.586619	-0.769504	26.9133	0.75234	-0.410543		#DIV/0!	#DIV/0!		#DIV/0!	#DIV/0!		#DIV/0!	#DIV/0!		#DIV/0!	#DIV/0!		#DIV/0!	#DIV/0!		#DIV/0!	#DIV/0!		#DIV/0!	#DIV/0!		#DIV/0!	#DIV/0!		#DIV/0!	#DIV/0!
				4.80568	2.26474		10.4118	3.38015		0.957043	-0.0633444		#DIV/0!	#DIV/0!		#DIV/0!	#DIV/0!		#DIV/0!	#DIV/0!		#DIV/0!	#DIV/0!		#DIV/0!	#DIV/0!		#DIV/0!	#DIV/0!		#DIV/0!	#DIV/0!		#DIV/0!	#DIV/0!		#DIV/0!	#DIV/0!
				4.80568	2.26474		10.4118	3.38015		0.957043	-0.0633444		#DIV/0!	#DIV/0!		#DIV/0!	#DIV/0!		#DIV/0!	#DIV/0!		#DIV/0!	#DIV/0!		#DIV/0!	#DIV/0!		#DIV/0!	#DIV/0!		#DIV/0!	#DIV/0!		#DIV/0!	#DIV/0!		#DIV/0!	#DIV/0!
				4.80568	2.26474		10.4118	3.38015		0.957043	-0.0633444		#DIV/0!	#DIV/0!		#DIV/0!	#DIV/0!		#DIV/0!	#DIV/0!		#DIV/0!	#DIV/0!		#DIV/0!	#DIV/0!		#DIV/0!	#DIV/0!		#DIV/0!	#DIV/0!		#DIV/0!	#DIV/0!		#DIV/0!	#DIV/0!
				4.80568	2.26474		10.4118	3.38015		0.957043	-0.0633444		#DIV/0!	#DIV/0!		#DIV/0!	#DIV/0!		#DIV/0!	#DIV/0!		#DIV/0!	#DIV/0!		#DIV/0!	#DIV/0!		#DIV/0!	#DIV/0!		#DIV/0!	#DIV/0!		#DIV/0!	#DIV/0!		#DIV/0!	#DIV/0!
				4.80568	2.26474		10.4118	3.38015		0.957043	-0.0633444		#DIV/0!	#DIV/0!		#DIV/0!	#DIV/0!		#DIV/0!	#DIV/0!		#DIV/0!	#DIV/0!		#DIV/0!	#DIV/0!		#DIV/0!	#DIV/0!		#DIV/0!	#DIV/0!		#DIV/0!	#DIV/0!		#DIV/0!	#DIV/0!
				4.80568	2.26474		10.4118	3.38015		0.957043	-0.0633444		#DIV/0!	#DIV/0!		#DIV/0!	#DIV/0!		#DIV/0!	#DIV/0!		#DIV/0!	#DIV/0!		#DIV/0!	#DIV/0!		#DIV/0!	#DIV/0!		#DIV/0!	#DIV/0!		#DIV/0!	#DIV/0!		#DIV/0!	#DIV/0!
				4.80568	2.26474		10.4118	3.38015		0.957043	-0.0633444		#DIV/0!	#DIV/0!		#DIV/0!	#DIV/0!		#DIV/0!	#DIV/0!		#DIV/0!	#DIV/0!		#DIV/0!	#DIV/0!		#DIV/0!	#DIV/0!		#DIV/0!	#DIV/0!		#DIV/0!	#DIV/0!		#DIV/0!	#DIV/0!
				4.80568	2.26474		10.4118	3.38015		0.957043	-0.0633444		#DIV/0!	#DIV/0!		#DIV/0!	#DIV/0!		#DIV/0!	#DIV/0!		#DIV/0!	#DIV/0!		#DIV/0!	#DIV/0!		#DIV/0!	#DIV/0!		#DIV/0!	#DIV/0!		#DIV/0!	#DIV/0!		#DIV/0!	#DIV/0!
Mtz irr	Cts	Cts	Cts	FC	log2(FC)	Cts	FC	log2(FC)	Cts	FC	log2(FC)	Cts	FC	log2(FC)	Cts	FC	log2(FC)	Cts	FC	log2(FC)	Cts	FC	log2(FC)	Cts	FC	log2(FC)	Cts	FC	log2(FC)	Cts	FC	log2(FC)	Cts	FC	log2(FC)	Cts	FC	log2(FC)
Mtz irr #1	23.4742		25.6994	3.24347	1.69754	26.4212	2.89055	1.53134	26.0247	1.81233	0.857845		#DIV/0!	#DIV/0!		#DIV/0!	#DIV/0!		#DIV/0!	#DIV/0!		#DIV/0!	#DIV/0!		#DIV/0!	#DIV/0!		#DIV/0!	#DIV/0!		#DIV/0!	#DIV/0!		#DIV/0!	#DIV/0!		#DIV/0!	#DIV/0!
Mtz irr #2	23.9924		25.9599	4.03747	2.01345	26.61	3.78504	1.92031	25.9939	2.79578	1.48325		#DIV/0!	#DIV/0!		#DIV/0!	#DIV/0!		#DIV/0!	#DIV/0!		#DIV/0!	#DIV/0!		#DIV/0!	#DIV/0!		#DIV/0!	#DIV/0!		#DIV/0!	#DIV/0!		#DIV/0!	#DIV/0!		#DIV/0!	#DIV/0!
Mtz irr #3	23.2567		27.4321	0.75451	-0.406388	30.586	0.104697	-3.25571	26.4151	1.16318	0.218079		#DIV/0!	#DIV/0!		#DIV/0!	#DIV/0!		#DIV/0!	#DIV/0!		#DIV/0!	#DIV/0!		#DIV/0!	#DIV/0!		#DIV/0!	#DIV/0!		#DIV/0!	#DIV/0!		#DIV/0!	#DIV/0!		#DIV/0!	#DIV/0!
Mtz irr #4	24.9161		30.1543	0.374884	-1.41548	29.9158	0.650066	-0.621343	28.6752	0.909389	-0.137031		#DIV/0!	#DIV/0!		#DIV/0!	#DIV/0!		#DIV/0!	#DIV/0!		#DIV/0!	#DIV/0!		#DIV/0!	#DIV/0!		#DIV/0!	#DIV/0!		#DIV/0!	#DIV/0!		#DIV/0!	#DIV/0!		#DIV/0!	#DIV/0!
				4.80568	2.26474		10.4118	3.38015		0.957043	-0.0633444		#DIV/0!	#DIV/0!		#DIV/0!	#DIV/0!		#DIV/0!	#DIV/0!		#DIV/0!	#DIV/0!		#DIV/0!	#DIV/0!		#DIV/0!	#DIV/0!		#DIV/0!	#DIV/0!		#DIV/0!	#DIV/0!		#DIV/0!	#DIV/0!
				4.80568	2.26474		10.4118	3.38015		0.957043	-0.0633444		#DIV/0!	#DIV/0!		#DIV/0!	#DIV/0!		#DIV/0!	#DIV/0!		#DIV/0!	#DIV/0!		#DIV/0!	#DIV/0!		#DIV/0!	#DIV/0!		#DIV/0!	#DIV/0!		#DIV/0!	#DIV/0!		#DIV/0!	#DIV/0!
				4.80568	2.26474		10.4118	3.38015		0.957043	-0.0633444		#DIV/0!	#DIV/0!		#DIV/0!	#DIV/0!		#DIV/0!	#DIV/0!		#DIV/0!	#DIV/0!		#DIV/0!	#DIV/0!		#DIV/0!	#DIV/0!		#DIV/0!	#DIV/0!		#DIV/0!	#DIV/0!		#DIV/0!	#DIV/0!
				4.80568	2.26474		10.4118	3.38015		0.957043	-0.0633444		#DIV/0!	#DIV/0!		#DIV/0!	#DIV/0!		#DIV/0!	#DIV/0!		#DIV/0!	#DIV/0!		#DIV/0!	#DIV/0!		#DIV/0!	#DIV/0!		#DIV/0!	#DIV/0!		#DIV/0!	#DIV/0!		#DIV/0!	#DIV/0!
				4.80568	2.26474		10.4118	3.38015		0.957043	-0.0633444		#DIV/0!	#DIV/0!		#DIV/0!	#DIV/0!		#DIV/0!	#DIV/0!		#DIV/0!	#DIV/0!		#DIV/0!	#DIV/0!		#DIV/0!	#DIV/0!		#DIV/0!	#DIV/0!		#DIV/0!	#DIV/0!		#DIV/0!	#DIV/0!
				4.80568	2.26474		10.4118	3.38015		0.957043	-0.0633444		#DIV/0!	#DIV/0!		#DIV/0!	#DIV/0!		#DIV/0!	#DIV/0!		#DIV/0!	#DIV/0!		#DIV/0!	#DIV/0!		#DIV/0!	#DIV/0!		#DIV/0!	#DIV/0!		#DIV/0!	#DIV/0!		#DIV/0!	#DIV/0!
				4.80568	2.26474		10.4118	3.38015		0.957043	-0.0633444		#DIV/0!	#DIV/0!		#DIV/0!	#DIV/0!		#DIV/0!	#DIV/0!		#DIV/0!	#DIV/0!		#DIV/0!	#DIV/0!		#DIV/0!	#DIV/0!		#DIV/0!	#DIV/0!		#DIV/0!	#DIV/0!		#DIV/0!	#DIV/0!
				4.80568	2.26474		10.4118	3.38015		0.957043	-0.0633444		#DIV/0!	#DIV/0!		#DIV/0!	#DIV/0!		#DIV/0!	#DIV/0!		#DIV/0!	#DIV/0!		#DIV/0!	#DIV/0!		#DIV/0!	#DIV/0!		#DIV/0!	#DIV/0!		#DIV/0!	#DIV/0!		#DIV/0!	#DIV/0!
cond. 4	Cts	Cts	Cts	FC	log2(FC)	Cts	FC	log2(FC)	Cts	FC	log2(FC)	Cts	FC	log2(FC)	Cts	FC	log2(FC)	Cts	FC	log2(FC)	Cts	FC	log2(FC)	Cts	FC	log2(FC)	Cts	FC	log2(FC)	Cts	FC	log2(FC)	Cts	FC	log2(FC)	Cts	FC	log2(FC)
				4.80568	2.26474		10.4118	3.38015		0.957043	-0.0633444		#DIV/0!	#DIV/0!		#DIV/0!	#DIV/0!		#DIV/0!	#DIV/0!		#DIV/0!	#DIV/0!		#DIV/0!	#DIV/0!		#DIV/0!	#DIV/0!		#DIV/0!	#DIV/0!		#DIV/0!	#DIV/0!		#DIV/0!	#DIV/0!
				4.80568	2.26474		10.4118	3.38015		0.957043	-0.0633444		#DIV/0!	#DIV/0!		#DIV/0!	#DIV/0!		#DIV/0!	#DIV/0!		#DIV/0!	#DIV/0!		#DIV/0!	#DIV/0!		#DIV/0!	#DIV/0!		#DIV/0!	#DIV/0!		#DIV/0!	#DIV/0!		#DIV/0!	#DIV/0!
				4.80568	2.26474		10.4118	3.38015		0.957043	-0.0633444		#DIV/0!	#DIV/0!		#DIV/0!	#DIV/0!		#DIV/0!	#DIV/0!		#DIV/0!	#DIV/0!		#DIV/0!	#DIV/0!		#DIV/0!	#DIV/0!		#DIV/0!	#DIV/0!		#DIV/0!	#DIV/0!		#DIV/0!	#DIV/0!
				4.80568	2.26474		10.4118	3.38015		0.957043	-0.0633444		#DIV/0!	#DIV/0!		#DIV/0!	#DIV/0!		#DIV/0!	#DIV/0!		#DIV/0!	#DIV/0!		#DIV/0!	#DIV/0!		#DIV/0!	#DIV/0!		#DIV/0!	#DIV/0!		#DIV/0!	#DIV/0!		#DIV/0!	#DIV/0!
				4.80568	2.26474		10.4118	3.38015		0.957043	-0.0633444		#DIV/0!	#DIV/0!		#DIV/0!	#DIV/0!		#DIV/0!	#DIV/0!		#DIV/0!	#DIV/0!		#DIV/0!	#DIV/0!		#DIV/0!	#DIV/0!		#DIV/0!	#DIV/0!		#DIV/0!	#DIV/0!		#DIV/0!	#DIV/0!
				4.80568	2.26474		10.4118	3.38015		0.957043	-0.0633444		#DIV/0!	#DIV/0!		#DIV/0!	#DIV/0!		#DIV/0!	#DIV/0!		#DIV/0!	#DIV/0!		#DIV/0!	#DIV/0!		#DIV/0!	#DIV/0!		#DIV/0!	#DIV/0!		#DIV/0!	#DIV/0!		#DIV/0!	#DIV/0!
				4.80568	2.26474		10.4118	3.38015		0.957043	-0.0633444		#DIV/0!	#DIV/0!		#DIV/0!	#DIV/0!		#DIV/0!	#DIV/0!		#DIV/0!	#DIV/0!		#DIV/0!	#DIV/0!		#DIV/0!	#DIV/0!		#DIV/0!	#DIV/0!		#DIV/0!	#DIV/0!		#DIV/0!	#DIV/0!
				4.80568	2.26474		10.4118	3.38015		0.957043	-0.0633444		#DIV/0!	#DIV/0!		#DIV/0!	#DIV/0!		#DIV/0!	#DIV/0!		#DIV/0!	#DIV/0!		#DIV/0!	#DIV/0!		#DIV/0!	#DIV/0!		#DIV/0!	#DIV/0!		#DIV/0!	#DIV/0!		#DIV/0!	#DIV/0!
				4.80568	2.26474		10.4118	3.38015		0.957043	-0.0633444		#DIV/0!	#DIV/0!		#DIV/0!	#DIV/0!		#DIV/0!	#DIV/0!		#DIV/0!	#DIV/0!		#DIV/0!	#DIV/0!		#DIV/0!	#DIV/0!		#DIV/0!	#DIV/0!		#DIV/0!	#DIV/0!		#DIV/0!	#DIV/0!
				4.80568	2.26474		10.4118	3.38015		0.957043	-0.0633444		#DIV/0!	#DIV/0!		#DIV/0!	#DIV/0!		#DIV/0!	#DIV/0!		#DIV/0!	#DIV/0!		#DIV/0!	#DIV/0!		#DIV/0!	#DIV/0!		#DIV/0!	#DIV/0!		#DIV/0!	#DIV/0!		#DIV/0!	#DIV/0!
				4.80568	2.26474		10.4118	3.38015		0.957043	-0.0633444		#DIV/0!	#DIV/0!		#DIV/0!	#DIV/0!		#DIV/0!	#DIV/0!		#DIV/0!	#DIV/0!		#DIV/0!	#DIV/0!		#DIV/0!	#DIV/0!		#DIV/0!	#DIV/0!		#DIV/0!	#DIV/0!		#DIV/0!	#DIV/0!
				4.80568	2.26474		10.4118	3.38015		0.957043	-0.0633444		#DIV/0!	#DIV/0!		#DIV/0!	#DIV/0!		#DIV/0!	#DIV/0!		#DIV/0!	#DIV/0!		#DIV/0!	#DIV/0!		#DIV/0!	#DIV/0!		#DIV/0!	#DIV/0!		#DIV/0!	#DIV/0!		#DIV/0!	#DIV/0!
cond. 5	Cts	Cts	Cts	FC	log2(FC)	Cts	FC	log2(FC)	Cts	FC	log2(FC)	Cts	FC	log2(FC)	Cts	FC	log2(FC)	Cts	FC	log2(FC)	Cts	FC	log2(FC)	Cts	FC	log2(FC)	Cts	FC	log2(FC)	Cts	FC	log2(FC)	Cts	FC	log2(FC)	Cts	FC	log2(FC)
				4.80568	2.26474		10.4118	3.38015		0.957043	-0.0633444		#DIV/0!	#DIV/0!		#DIV/0!	#DIV/0!		#DIV/0!	#DIV/0!		#DIV/0!	#DIV/0!		#DIV/0!	#DIV/0!		#DIV/0!	#DIV/0!		#DIV/0!	#DIV/0!		#DIV/0!	#DIV/0!		#DIV/0!	#DIV/0!
				4.80568	2.26474		10.4118	3.38015		0.957043	-0.0633444		#DIV/0!	#DIV/0!		#DIV/0!	#DIV/0!		#DIV/0!	#DIV/0!		#DIV/0!	#DIV/0!		#DIV/0!	#DIV/0!		#DIV/0!	#DIV/0!		#DIV/0!	#DIV/0!		#DIV/0!	#DIV/0!		#DIV/0!	#DIV/0!
				4.80568	2.26474		10.4118	3.38015		0.957043	-0.0633444		#DIV/0!	#DIV/0!		#DIV/0!	#DIV/0!		#DIV/0!	#DIV/0!		#DIV/0!	#DIV/0!		#DIV/0!	#DIV/0!		#DIV/0!	#DIV/0!		#DIV/0!	#DIV/0!		#DIV/0!	#DIV/0!		#DIV/0!	#DIV/0!
				4.80568	2.26474		10.4118	3.38015		0.957043	-0.0633444		#DIV/0!	#DIV/0!		#DIV/0!	#DIV/0!		#DIV/0!	#DIV/0!		#DIV/0!	#DIV/0!		#DIV/0!	#DIV/0!		#DIV/0!	#DIV/0!		#DIV/0!	#DIV/0!		#DIV/0!	#DIV/0!		#DIV/0!	#DIV/0!
				4.80568	2.26474		10.4118	3.38015		0.957043	-0.0633444		#DIV/0!	#DIV/0!		#DIV/0!	#DIV/0!		#DIV/0!	#DIV/0!		#DIV/0!	#DIV/0!		#DIV/0!	#DIV/0!		#DIV/0!	#DIV/0!		#DIV/0!	#DIV/0!		#DIV/0!	#DIV/0!		#DIV/0!	#DIV/0!
				4.80568	2.26474		10.4118	3.38015		0.957043	-0.0633444		#DIV/0!	#DIV/0!		#DIV/0!	#DIV/0!		#DIV/0!	#DIV/0!		#DIV/0!	#DIV/0!		#DIV/0!	#DIV/0!		#DIV/0!	#DIV/0!		#DIV/0!	#DIV/0!		#DIV/0!	#DIV/0!		#DIV/0!	#DIV/0!
				4.80568	2.26474		10.4118	3.38015		0.957043	-0.0633444		#DIV/0!	#DIV/0!		#DIV/0!	#DIV/0!		#DIV/0!	#DIV/0!		#DIV/0!	#DIV/0!		#DIV/0!	#DIV/0!		#DIV/0!	#DIV/0!		#DIV/0!	#DIV/0!		#DIV/0!	#DIV/0!		#DIV/0!	#DIV/0!
				4.80568	2.26474		10.4118	3.38015		0.957043	-0.0633444		#DIV/0!	#DIV/0!		#DIV/0!	#DIV/0!		#DIV/0!	#DIV/0!		#DIV/0!	#DIV/0!		#DIV/0!	#DIV/0!		#DIV/0!	#DIV/0!		#DIV/0!	#DIV/0!		#DIV/0!	#DIV/0!		#DIV/0!	#DIV/0!
				4.80568	2.26474		10.4118	3.38015		0.957043	-0.0633444		#DIV/0!	#DIV/0!		#DIV/0!	#DIV/0!		#DIV/0!	#DIV/0!		#DIV/0!	#DIV/0!		#DIV/0!	#DIV/0!		#DIV/0!	#DIV/0!		#DIV/0!	#DIV/0!		#DIV/0!	#DIV/0!		#DIV/0!	#DIV/0!
				4.80568	2.26474		10.4118	3.38015		0.957043	-0.0633444		#DIV/0!	#DIV/0!		#DIV/0!	#DIV/0!		#DIV/0!	#DIV/0!		#DIV/0!	#DIV/0!		#DIV/0!	#DIV/0!		#DIV/0!	#DIV/0!		#DIV/0!	#DIV/0!		#DIV/0!	#DIV/0!		#DIV/0!	#DIV/0!
				4.80568	2.26474		10.4118	3.38015		0.957043	-0.0633444		#DIV/0!	#DIV/0!		#DIV/0!	#DIV/0!		#DIV/0!	#DIV/0!		#DIV/0!	#DIV/0!		#DIV/0!	#DIV/0!		#DIV/0!	#DIV/0!		#DIV/0!	#DIV/0!		#DIV/0!	#DIV/0!		#DIV/0!	#DIV/0!
				4.80568	2.26474		10.4118	3.38015		0.957043	-0.0633444		#DIV/0!	#DIV/0!		#DIV/0!	#DIV/0!		#DIV/0!	#DIV/0!		#DIV/0!	#DIV/0!		#DIV/0!	#DIV/0!		#DIV/0!	#DIV/0!		#DIV/0!	#DIV/0!		#DIV/0!	#DIV/0!		#DIV/0!	#DIV/0!

## Sheet: (3a_1) FC box plot 1 n<=12
	condition
gene	DNMSO non-irr	DMSO irr	Mtz non-irr	Mtz irr	cond. 4	cond. 5
p21	1.92926	2.00211	0.785592	3.24347	4.80568	4.80568
p21	0.138559	2.40418	0.275259	4.03747	4.80568	4.80568
p21	0.714487	9.33805	2.95353	0.75451	4.80568	4.80568
p21	5.23577	6.39805	0.494939	0.374884	4.80568	4.80568
p21	4.80568	4.80568	4.80568	4.80568	4.80568	4.80568
p21	4.80568	4.80568	4.80568	4.80568	4.80568	4.80568
p21	4.80568	4.80568	4.80568	4.80568	4.80568	4.80568
p21	4.80568	4.80568	4.80568	4.80568	4.80568	4.80568
p21	4.80568	4.80568	4.80568	4.80568	4.80568	4.80568
p21	4.80568	4.80568	4.80568	4.80568	4.80568	4.80568
p21	4.80568	4.80568	4.80568	4.80568	4.80568	4.80568
p21	4.80568	4.80568	4.80568	4.80568	4.80568	4.80568
gfp	1.70783
gfp	0.202429
gfp	0.638738
gfp	4.52856
gfp	10.4118
gfp	10.4118
gfp	10.4118
gfp	10.4118
gfp	10.4118
gfp	10.4118
gfp	10.4118
gfp	10.4118
ntr	1.13803
ntr	0.370512
ntr	0.930251
ntr	2.54943
ntr	0.957043
ntr	0.957043
ntr	0.957043
ntr	0.957043
ntr	0.957043
ntr	0.957043
ntr	0.957043
ntr	0.957043
gene 4	#DIV/0!
gene 4	#DIV/0!
gene 4	#DIV/0!
gene 4	#DIV/0!
gene 4	#DIV/0!
gene 4	#DIV/0!
gene 4	#DIV/0!
gene 4	#DIV/0!
gene 4	#DIV/0!
gene 4	#DIV/0!
gene 4	#DIV/0!
gene 4	#DIV/0!
gene 5	#DIV/0!
gene 5	#DIV/0!
gene 5	#DIV/0!
gene 5	#DIV/0!
gene 5	#DIV/0!
gene 5	#DIV/0!
gene 5	#DIV/0!
gene 5	#DIV/0!
gene 5	#DIV/0!
gene 5	#DIV/0!
gene 5	#DIV/0!
gene 5	#DIV/0!
gene 6	#DIV/0!
gene 6	#DIV/0!
gene 6	#DIV/0!
gene 6	#DIV/0!
gene 6	#DIV/0!
gene 6	#DIV/0!
gene 6	#DIV/0!
gene 6	#DIV/0!
gene 6	#DIV/0!
gene 6	#DIV/0!
gene 6	#DIV/0!
gene 6	#DIV/0!
gene 7	#DIV/0!
gene 7	#DIV/0!
gene 7	#DIV/0!
gene 7	#DIV/0!
gene 7	#DIV/0!
gene 7	#DIV/0!
gene 7	#DIV/0!
gene 7	#DIV/0!
gene 7	#DIV/0!
gene 7	#DIV/0!
gene 7	#DIV/0!
gene 7	#DIV/0!
gene 8	#DIV/0!
gene 8	#DIV/0!
gene 8	#DIV/0!
gene 8	#DIV/0!
gene 8	#DIV/0!
gene 8	#DIV/0!
gene 8	#DIV/0!
gene 8	#DIV/0!
gene 8	#DIV/0!
gene 8	#DIV/0!
gene 8	#DIV/0!
gene 8	#DIV/0!
gene 9	#DIV/0!
gene 9	#DIV/0!
gene 9	#DIV/0!
gene 9	#DIV/0!
gene 9	#DIV/0!
gene 9	#DIV/0!
gene 9	#DIV/0!
gene 9	#DIV/0!
gene 9	#DIV/0!
gene 9	#DIV/0!
gene 9	#DIV/0!
gene 9	#DIV/0!
gene 10	#DIV/0!
gene 10	#DIV/0!
gene 10	#DIV/0!
gene 10	#DIV/0!
gene 10	#DIV/0!
gene 10	#DIV/0!
gene 10	#DIV/0!
gene 10	#DIV/0!
gene 10	#DIV/0!
gene 10	#DIV/0!
gene 10	#DIV/0!
gene 10	#DIV/0!
gene 11	#DIV/0!
gene 11	#DIV/0!
gene 11	#DIV/0!
gene 11	#DIV/0!
gene 11	#DIV/0!
gene 11	#DIV/0!
gene 11	#DIV/0!
gene 11	#DIV/0!
gene 11	#DIV/0!
gene 11	#DIV/0!
gene 11	#DIV/0!
gene 11	#DIV/0!
gene 12	#DIV/0!	#DIV/0!	#DIV/0!	#DIV/0!	#DIV/0!	#DIV/0!
gene 12	#DIV/0!	#DIV/0!	#DIV/0!	#DIV/0!	#DIV/0!	#DIV/0!
gene 12	#DIV/0!	#DIV/0!	#DIV/0!	#DIV/0!	#DIV/0!	#DIV/0!
gene 12	#DIV/0!	#DIV/0!	#DIV/0!	#DIV/0!	#DIV/0!	#DIV/0!
gene 12	#DIV/0!	#DIV/0!	#DIV/0!	#DIV/0!	#DIV/0!	#DIV/0!
gene 12	#DIV/0!	#DIV/0!	#DIV/0!	#DIV/0!	#DIV/0!	#DIV/0!
gene 12	#DIV/0!	#DIV/0!	#DIV/0!	#DIV/0!	#DIV/0!	#DIV/0!
gene 12	#DIV/0!	#DIV/0!	#DIV/0!	#DIV/0!	#DIV/0!	#DIV/0!
gene 12	#DIV/0!	#DIV/0!	#DIV/0!	#DIV/0!	#DIV/0!	#DIV/0!
gene 12	#DIV/0!	#DIV/0!	#DIV/0!	#DIV/0!	#DIV/0!	#DIV/0!
gene 12	#DIV/0!	#DIV/0!	#DIV/0!	#DIV/0!	#DIV/0!	#DIV/0!
gene 12	#DIV/0!	#DIV/0!	#DIV/0!	#DIV/0!	#DIV/0!	#DIV/0!

## Sheet: (2b) fold change open n
Cts = means of (1-3) technical replicates per biological replicate, external calculation;								ref.= reference;		cond.= condition;		FC = fold change
data input		use function AVERAGE on respective ref. cond. Cts							data output colums
choose ref. genes (1/2/b for both):				Remark for the addition of further genes by extending the spread sheet to the right: The E formula needs to be altered by changing the row number of the cells from column J and K of tab "(1) primer efficiency" to the respective value in row 10 of the current tab (automatically calculated).
	rpl13a	ref. gene 2	p21			gfp			ntr			gene 4			gene 5			gene 6			gene 7			gene 8			gene 9			gene 10			gene 11			gene 12
E =	2.2153	2	2.09975	(1) J & K:	24	2.12798	(1) J & K:	31	1.99951	(1) J & K:	38	2	(1) J & K:	45	2	(1) J & K:	52	2	(1) J & K:	59	2	(1) J & K:	66	2	(1) J & K:	73	2	(1) J & K:	80	2	(1) J & K:	87	2	(1) J & K:	94	2	(1) J & K:	101
ref. cond. mean Ct:
sample	Cts	Cts	Cts	FC	log2(FC)	Cts	FC	log2(FC)	Cts	FC	log2(FC)	Cts	FC	log2(FC)	Cts	FC	log2(FC)	Cts	FC	log2(FC)	Cts	FC	log2(FC)	Cts	FC	log2(FC)	Cts	FC	log2(FC)	Cts	FC	log2(FC)	Cts	FC	log2(FC)	Cts	FC	log2(FC)
				1	0		1	0		1	0		1	0		1	0		1	0		1	0		1	0		1	0		1	0		1	0		1	0
				1	0		1	0		1	0		1	0		1	0		1	0		1	0		1	0		1	0		1	0		1	0		1	0
				1	0		1	0		1	0		1	0		1	0		1	0		1	0		1	0		1	0		1	0		1	0		1	0
				1	0		1	0		1	0		1	0		1	0		1	0		1	0		1	0		1	0		1	0		1	0		1	0
				1	0		1	0		1	0		1	0		1	0		1	0		1	0		1	0		1	0		1	0		1	0		1	0
				1	0		1	0		1	0		1	0		1	0		1	0		1	0		1	0		1	0		1	0		1	0		1	0
				1	0		1	0		1	0		1	0		1	0		1	0		1	0		1	0		1	0		1	0		1	0		1	0
				1	0		1	0		1	0		1	0		1	0		1	0		1	0		1	0		1	0		1	0		1	0		1	0
				1	0		1	0		1	0		1	0		1	0		1	0		1	0		1	0		1	0		1	0		1	0		1	0
				1	0		1	0		1	0		1	0		1	0		1	0		1	0		1	0		1	0		1	0		1	0		1	0
				1	0		1	0		1	0		1	0		1	0		1	0		1	0		1	0		1	0		1	0		1	0		1	0
				1	0		1	0		1	0		1	0		1	0		1	0		1	0		1	0		1	0		1	0		1	0		1	0
				1	0		1	0		1	0		1	0		1	0		1	0		1	0		1	0		1	0		1	0		1	0		1	0
				1	0		1	0		1	0		1	0		1	0		1	0		1	0		1	0		1	0		1	0		1	0		1	0
				1	0		1	0		1	0		1	0		1	0		1	0		1	0		1	0		1	0		1	0		1	0		1	0
				1	0		1	0		1	0		1	0		1	0		1	0		1	0		1	0		1	0		1	0		1	0		1	0
				1	0		1	0		1	0		1	0		1	0		1	0		1	0		1	0		1	0		1	0		1	0		1	0
				1	0		1	0		1	0		1	0		1	0		1	0		1	0		1	0		1	0		1	0		1	0		1	0
				1	0		1	0		1	0		1	0		1	0		1	0		1	0		1	0		1	0		1	0		1	0		1	0
				1	0		1	0		1	0		1	0		1	0		1	0		1	0		1	0		1	0		1	0		1	0		1	0
				1	0		1	0		1	0		1	0		1	0		1	0		1	0		1	0		1	0		1	0		1	0		1	0
				1	0		1	0		1	0		1	0		1	0		1	0		1	0		1	0		1	0		1	0		1	0		1	0
				1	0		1	0		1	0		1	0		1	0		1	0		1	0		1	0		1	0		1	0		1	0		1	0
				1	0		1	0		1	0		1	0		1	0		1	0		1	0		1	0		1	0		1	0		1	0		1	0
				1	0		1	0		1	0		1	0		1	0		1	0		1	0		1	0		1	0		1	0		1	0		1	0
				1	0		1	0		1	0		1	0		1	0		1	0		1	0		1	0		1	0		1	0		1	0		1	0
				1	0		1	0		1	0		1	0		1	0		1	0		1	0		1	0		1	0		1	0		1	0		1	0
				1	0		1	0		1	0		1	0		1	0		1	0		1	0		1	0		1	0		1	0		1	0		1	0

## Sheet: (3b) box plot open n
mean Ct = mean of 3 technical replicates
E	1.97			E	2.01			E	2.05
	rpl13a				dmrt1				cyp19a1a					mean folds
sample	mean Ct	delta Ct		sample	mean Ct	delta Ct	folds	sample	mean Ct	delta Ct	folds			dmrt1	cyp19a1a
ovary 1	17.6448	-0.0462145		ovary 1	26.63	0.486667	1.44932	ovary 1	24.12	-0.38	0.785493		ovary	1.04418	1.0196
ovary 2	16.7081	0.890504		ovary 2	26.75	0.366667	0.706234	ovary 2	22.9	0.84	0.999194		testis	58.3627	0.28763
ovary 3	18.4429	-0.84429		ovary 3	27.97	-0.853333	0.976984	ovary 3	24.2	-0.46	1.27411
testis 1	18.1075	-0.508856		testis 1	21.74	5.37667	60.2595	testis 1	28.17	-4.43	0.058718			SEM
testis 2	18.1201	-0.521473		testis 2	21.52	5.59667	70.8669	testis 2	24.76	-1.02	0.684805			dmrt1	cyp19a1a
testis 3	16.2318	1.36684		testis 3	20.37	6.74667	43.9616	testis 3	25.41	-1.67	0.119366		ovary	0.177282	0.11547
													testis	6.38873	0.162775
average
ovaries	17.5986				27.1167				23.74
	dmrt1
	cyp19a1a
		ovary	testis			dmrt1	cyp19a1a
	dmrt1	1.44932	60.2595		ovary	1.44932	0.785493
	dmrt1	0.706234	70.8669		ovary	0.706234	0.999194
	dmrt1	0.976984	43.9616		ovary	0.976984	1.27411
	cyp19a1a	0.785493	0.058718		testis	60.2595	0.058718
	cyp19a1a	0.999194	0.684805		testis	70.8669	0.684805
	cyp19a1a	1.27411	0.119366		testis	43.9616	0.119366
		ovary	testis			dmrt1	cyp19a1a
	dmrt1	0.535375	5.91312		ovary	0.535375	-0.34833
	dmrt1	-0.501783	6.14704		ovary	-0.501783	-0.00116348
	dmrt1	-0.0335928	5.45817		ovary	-0.0335928	0.349494
	cyp19a1a	-0.34833	-4.09005		testis	5.91312	-4.09005
	cyp19a1a	-0.00116348	-0.546234		testis	6.14704	-0.546234
	cyp19a1a	0.349494	-3.06653		testis	5.45817	-3.06653
